# Supplementary material for: Single-cell transcriptome analysis reveals heterogeneity and convergence of the tumor microenvironment in colorectal cancer
Source: Frontiers journal article supplement (doi:10.3389/fimmu.2022.1003419), 2023-01-04
Supplement: Data_Sheet_1.ZIP [file Data_Sheet_1.ZIP]

## Sheet: Table_S1
Naïve CD8+ T cells			Tem			Teff			Tex			Naïve CD4+ T cells			Tfh			Th1			Treg			Follicular_cells			Plasma_cells			DCs			Macrophages			Mast_cells			Monocytes			TAMs			NK_cells			ILCs
p_value	avg_logFC	Marker	p_value	avg_logFC	Marker	p_value	avg_logFC	Marker	p_value	avg_logFC	Marker	p_value	avg_logFC	Marker	p_value	avg_logFC	Marker	p_value	avg_logFC	Marker	p_value	avg_logFC	Marker	p_value	avg_logFC	Marker	p_value	avg_logFC	Marker	p_value	avg_logFC	Marker	p_value	avg_logFC	Marker	p_value	avg_logFC	Marker	p_value	avg_logFC	Marker	p_value	avg_logFC	Marker	p_value	avg_logFC	Marker	p_value	avg_logFC
3.47451e-88	0.911449	CXCR4	7.8442e-214	3.89064	CX3CR1	7.11987e-180	2.73843	GPR15	4.58464e-113	2.18186	HAVCR2	3.3146e-148	1.60118	RPS3A	1.45571e-110	1.38627	SRGN	3.08233e-217	2.18266	ANXA1	0	4.22297	FOXP3	7.96725e-148	6.08021	MS4A1	2.98236e-136	9.43627	JCHAIN	1.64545e-75	1.32622	PPP1R14A	4.00689e-106	3.11808	IL1B	9.02579e-258	5.9406	TPSD1	2.44108e-173	1.78178	FCN1	4.75476e-179	4.33842	TREM2	2.63259e-12	4.43776	GNG2	1.1303e-43	5.56711
6.3447e-85	0.980328	DNAJB1	5.46255e-176	2.04422	S1PR1	3.15938e-136	3.44719	TMIGD2	3.74667e-112	2.36674	VCAM1	3.93348e-138	1.48383	RPS6	3.80986e-84	1.10928	CXCR4	2.48747e-110	3.01017	CCL5	1.13933e-259	5.40464	CCR8	1.33663e-140	5.67679	HLA-DRB5	9.73414e-136	7.20916	MZB1	3.36554e-68	2.22147	CD1C	9.69916e-92	2.18778	PLAUR	2.8989e-257	2.34831	GATA2	1.35586e-137	1.83198	S100A9	2.05757e-174	3.01744	C1QC	5.6143e-12	4.08036	CCL5	6.65951e-23	4.13999
8.49646e-79	0.936005	GZMK	2.65465e-167	2.70001	FGFBP2	2.73023e-134	2.14434	SPRY1	1.91517e-109	3.09164	CXCL13	1.07997e-134	1.47345	RPL13	4.84342e-84	1.66965	NR4A2	3.61649e-78	1.89923	FKBP11	1.39038e-247	3.43011	IKZF2	7.56437e-139	6.815	HLA-DRA	4.50238e-132	5.84211	SSR4	4.73585e-68	2.14172	NAPSB	4.36252e-89	2.59526	CXCL2	1.6696e-256	1.48761	SLC45A3	5.57978e-136	1.97353	CLEC12A	1.68664e-163	3.84604	APOC1	9.70579e-12	7.64124	CCL4	7.59901e-23	3.95276
1.00003e-72	1.6219	LMNA	4.82151e-161	1.76158	TXNIP	2.83736e-114	1.67996	ITGA1	1.10695e-81	1.52787	RBPJ	8.68107e-133	1.82276	CCR7	2.13662e-81	1.7199	YPEL5	7.49197e-70	1.8678	ERN1	4.25924e-227	3.87712	IL2RA	7.69379e-138	5.76098	HLA-DRB1	5.78116e-129	6.41578	FKBP11	1.95784e-67	2.22183	CD1E	3.65496e-76	2.14703	CXCL8	8.22242e-250	3.95603	IL1RL1	4.67811e-126	2.24083	S100A8	5.36644e-155	3.85575	GPNMB	2.10603e-09	1.66593	SYNE2	1.41673e-20	4.8249
1.05139e-60	1.10096	DUSP2	5.5065e-156	2.18091	PLEK	1.30916e-91	1.34928	CAPG	1.5908e-79	1.6331	GOLIM4	1.13889e-126	1.35995	RPL7	1.44119e-70	1.85572	ZNF331	3.66035e-68	1.84667	STOM	2.00455e-217	1.69886	IL32	2.48229e-137	3.62175	CD74	1.3184e-124	6.09086	DERL3	4.09869e-60	1.73582	HLA-DRA	8.77203e-76	3.22444	OLR1	2.94316e-249	3.03429	SIGLEC6	6.12549e-120	4.38005	PPBP	2.87141e-151	2.6032	C1QB	3.26083e-09	7.17292	ALOX5AP	5.27402e-20	2.39274
2.27069e-60	1.16328	TUBA4A	5.33938e-141	2.21048	FCGR3A	6.89505e-86	1.91422	CD160	6.60318e-77	0.811537	CCL31	2.43018e-125	2.38436	TCF7	2.14744e-70	1.56114	JUNB	3.31129e-67	2.56299	GZMA	3.09859e-170	4.56727	LAYN	1.60606e-136	5.4779	BANK1	5.90038e-123	6.00269	XBP1	3.47764e-58	1.66555	HLA-DRB5	3.11657e-75	2.63843	G0S2	6.66929e-233	3.4917	SIGLEC17P	2.20318e-107	2.0008	MNDA	4.23375e-143	2.48251	C1QA	2.36169e-08	5.49494	FCGR3A	1.16521e-17	2.81398
1.57987e-57	2.12413	ENC1	1.00151e-139	2.18757	S1PR5	2.41783e-84	1.8488	LDLRAD4	2.40975e-73	2.28172	MYO7A	1.51645e-123	1.07267	EEF1A1	1.46664e-67	1.6156	RNF19A	5.22081e-67	2.11244	SYTL2	1.25931e-160	4.80796	TNFRSF4	1.32954e-134	5.87958	LTB	6.85336e-117	4.68584	TXNDC5	4.07939e-57	1.58762	CD74	1.03172e-71	3.8019	EREG	1.6783e-232	3.41793	HPGDS	3.37478e-104	2.81765	LRRK2	1.95353e-135	1.3283	FPR3	5.48226e-08	2.59734	GZMB	2.03537e-16	5.3117
9.94432e-57	1.42326	GPR183	5.47226e-136	2.5095	FGR	8.62125e-84	1.21949	CD7	8.85951e-72	1.08226	DUSP41	3.00642e-121	1.32261	RPL3	2.92434e-65	1.21176	FOS	2.98733e-64	1.8954	PTGER2	4.83839e-158	3.61345	TNFRSF18	8.42126e-134	6.07335	HLA-DPB1	1.63367e-112	4.90803	PRDX4	7.81403e-57	2.18279	PLD4	4.28384e-71	2.14912	IER3	5.91216e-222	1.26122	MAOB	2.65662e-102	1.79898	FAM65B	8.72786e-128	1.96708	MRC1	3.50895e-07	0.912085	TMSB4X	1.17529e-15	1.88802
8.67072e-55	0.941384	CD44	4.45447e-128	2.21833	LINC00861	1.03949e-81	0.901771	FOS1	3.63108e-71	1.27715	CD82	7.31672e-120	1.30187	RPS3	3.92707e-60	1.91681	RGS2	7.59629e-63	3.74624	MYBL1	8.65744e-157	2.82469	BATF	3.57695e-132	4.28998	CD52	3.67686e-110	2.59713	SLAMF7	4.50784e-56	2.18326	FLT3	1.11532e-70	2.5842	NLRP3	1.13297e-221	4.77737	HDC	4.40834e-102	1.9201	POU2F2	1.33953e-126	2.09535	PLA2G7	3.9278e-07	5.15389	PRDM1	1.99071e-14	2.4371
2.3511e-43	0.717624	SKIL	7.24176e-126	1.72782	FAM65B	2.18074e-77	1.25254	CD69	2.05333e-67	0.768733	NAB1	7.37984e-118	2.38059	LEF1	4.52846e-58	1.94576	NR3C1	1.596e-61	0.884313	SH3BGRL3	1.69842e-152	3.96199	IL1R2	2.97998e-129	5.21557	HLA-DQB1	6.58565e-110	4.11235	PRDM1	6.82839e-56	1.76338	HLA-DPB1	2.55136e-68	1.90571	HBEGF	1.05456e-219	2.34826	TIMP3	4.01882e-101	1.25402	VCAN	1.7303e-121	3.23568	APOE	4.03464e-07	2.73102	ZEB2	7.53836e-13	3.11059
9.68926e-43	0.923551	RGCC	4.04252e-124	1.7763	KLRG1	2.64696e-75	1.2377	PTGER4	3.11965e-63	2.43071	AFAP1L2	8.31161e-118	2.44806	LINC00861	8.50593e-52	2.80328	CXCR5	4.74579e-61	1.15751	IL7R	5.17509e-149	3.03633	F5	7.95302e-129	4.67035	LAPTM5	2.55305e-107	3.73046	SEC11C	9.20613e-56	1.80997	HLA-DQB2	3.34847e-67	1.77424	SOD2	2.75347e-208	2.68062	SLC18A2	7.99344e-92	1.49652	HK3	2.47806e-114	1.96658	MAF	7.85061e-07	3.77857	ANXA2	1.82115e-12	2.42742
4.66377e-42	0.639821	CREM	6.29973e-120	1.72811	A2M	3.76986e-73	0.963186	ITGAE	2.08433e-61	0.805218	GAPDH	4.18663e-114	2.01208	SELL	1.4725e-50	1.6475	AREG	2.16567e-60	0.715492	MYL12A	5.46103e-145	2.39932	STAM	2.14865e-124	4.31672	HLA-DPA1	1.32215e-106	4.00054	SSR3	2.6939e-55	1.77954	HLA-DQA1	6.3623e-67	2.66673	IL1RN	1.46849e-205	2.61084	LTC4S	3.13713e-89	1.63186	LILRA1	1.45663e-112	0.589099	TMEM51	1.35197e-06	2.53834	GLIPR1	3.70479e-12	6.43671
3.00613e-41	0.380024	ZFP36	1.37239e-108	1.56647	FCRL6	2.33924e-72	0.979172	FOSB1	4.78463e-61	3.42116	TNFSF4	3.55624e-112	1.38789	RPL9	2.00363e-48	1.72493	LRMP	1.55046e-55	0.916759	CD99	4.42287e-139	4.68668	TNFRSF9	3.6143e-122	5.73709	HLA-DQB2	3.33468e-105	3.01177	FKBP2	1.86353e-51	1.85709	HLA-DQB1	1.5883e-66	2.42894	PPIF	6.248e-196	2.32254	VWA5A	5.33309e-89	1.74478	LYST	3.2282e-111	1.85309	SLAMF8	1.98545e-06	1.69178	CD99	5.04125e-12	2.20801
1.15123e-40	0.882391	DDIT4	4.54457e-106	1.95916	PLAC8	2.50687e-68	1.49244	NR4A1	4.66019e-60	0.756934	HLA-DRA1	8.34149e-107	1.23573	RPL10	1.51205e-47	3.22965	ZBTB10	3.51373e-55	1.74939	MYO1F	6.47358e-131	1.68345	TIGIT	2.43773e-120	5.584	HLA-DQA1	1.55613e-103	3.24461	PPIB	6.92418e-51	1.31497	HLA-DQA2	4.00451e-65	3.88614	IL1A	8.19887e-195	1.906	SLC24A3	3.20171e-85	1.10671	LILRB2	5.53135e-111	0.867983	SLC7A8	2.22595e-06	2.92922	PYHIN1	7.10539e-11	0.936831
5.15072e-40	0.539285	YPEL5	9.94363e-104	1.63807	FCGR3B	4.76823e-67	2.19021	KLRC1	3.47568e-59	0.952053	GZMB	1.25277e-105	1.37957	EEF1G	2.11152e-44	2.47507	TOX2	1.14409e-54	1.38545	THEMIS	2.14481e-127	1.46453	CTLA4	1.1101e-119	5.7271	BCL11A	4.42085e-103	4.99156	SDF2L1	8.22618e-50	0.876643	ADAM19	3.31186e-64	2.45788	AQP9	2.22273e-187	4.10816	RAB27B	7.15407e-84	1.54122	CFP	2.17161e-105	1.97409	PLTP	3.34345e-06	2.90039	S100A6	1.50321e-10	4.35096
8.19124e-39	1.23965	CD28	1.39107e-103	1.11906	PZP	1.6278e-65	1.74496	IL12RB2	4.63563e-58	0.93326	FABP5	2.50229e-105	1.45214	RPL5	2.58624e-44	1.06471	DUSP1	6.94357e-54	1.10667	PARP8	5.38986e-124	2.32949	CARD16	7.30884e-118	1.78776	HLA-DRB6	1.80962e-102	10.7486	SDC1	3.20336e-49	1.62743	HLA-DPA1	9.81519e-59	2.5009	TIMP1	1.65174e-185	3.91928	KIT	4.07842e-83	1.3217	CX3CR1	3.78488e-104	1.69547	LGMN	4.31402e-06	1.8664	GZMA	3.05478e-10	2.17337
8.21452e-39	0.478938	EIF1	3.10178e-99	1.62825	PXN	4.0044e-64	1.89922	ATP8B4	1.93006e-55	1.30851	PHLDA11	2.95008e-104	2.55499	TXK	2.82859e-43	0.992546	BTG2	9.73609e-54	0.97644	S100A11	8.39697e-122	2.74949	RTKN2	1.50998e-110	5.23486	HLA-DMB	5.98278e-102	4.0139	ANKRD28	1.41424e-48	1.42788	HLA-DRB1	4.32993e-58	2.39244	GK	7.943e-185	4.21167	CTSG	1.23321e-77	1.90806	S100A12	3.13126e-103	0.42764	SLCO2B1	4.81154e-06	1.83636	CD247	4.59963e-10	1.66277
6.53181e-38	0.424036	SRGN	1.53608e-90	0.93605	NKG7	4.01684e-64	1.13669	JAML	2.77209e-54	1.11874	APOBEC3C	4.44798e-104	1.50692	RPL32	4.88416e-42	2.08462	TOX	8.66828e-53	0.881699	MGAT4A	1.77266e-121	2.52985	DUSP4	3.23751e-108	4.44594	IRF8	4.11408e-100	3.48233	HSP90B1	3.82404e-45	1.37435	HLA-DOA	7.96852e-58	2.30526	PDE4B	1.24782e-183	3.61035	CALB2	1.74566e-74	1.24211	FGR	7.42452e-102	0.995379	DOCK4	4.82711e-06	3.56103	PTPN22	2.30089e-09	2.09195
1.27648e-37	0.511809	BTG2	1.34859e-88	1.196	GIMAP4	1.69552e-63	0.97832	ZFP361	4.01911e-54	1.37434	ACP5	1.66033e-103	3.15965	LDLRAP1	1.32577e-41	2.2892	PTPN13	7.25944e-51	1.41236	KLRB1	8.59716e-119	2.6478	PMAIP1	5.88228e-108	4.44169	CD22	4.19294e-98	5.90786	TRIB1	6.44038e-45	1.47157	HLA-DOB	7.43249e-57	2.24082	CCL3L3	1.25585e-182	3.70628	HPGD	2.43473e-74	1.76247	PRAM1	1.31024e-101	1.44461	SCD	5.49827e-06	2.63095	GZMH	6.26427e-09	2.20657
2.1717e-36	0.520964	FOSB	8.86232e-88	2.38372	KLRF1	3.97199e-63	1.90895	KIR2DL4	1.23668e-50	0.958062	CD271	2.60249e-103	1.48271	TXNIP	4.1104e-39	2.1255	PDCD1	1.24275e-50	1.99672	ADAM19	2.47605e-118	2.97929	LAIR2	1.44591e-107	3.79517	TNFRSF13C	2.52718e-96	3.09442	RRBP1	2.31154e-39	0.897087	HLA-DMA	2.72959e-55	1.78441	TNFAIP3	6.8273e-176	7.48546	CPA3	2.92817e-71	1.83822	HRH2	1.35605e-101	1.24928	CD81	6.19992e-06	2.01547	LITAF	9.90573e-09	3.06222
4.38289e-36	1.19512	ELL2	3.25786e-87	1.07106	ITGB2	1.33698e-61	1.58934	ANKRD28	4.69685e-49	0.80034	HLA-DRB11	1.74178e-102	1.17437	RPL13A	8.22901e-39	1.15023	TMEM2	4.25191e-50	0.853472	CD52	6.89485e-114	2.31865	TNFRSF1B	1.84061e-106	4.26446	CD37	1.50065e-94	5.32555	TNFRSF17	1.24738e-38	0.759004	MCOLN2	3.52949e-55	1.94529	ICAM1	1.71129e-175	4.87973	BACE2	3.05495e-71	1.58657	MYO1F	1.56575e-100	1.52171	VSIG4	6.31815e-06	1.58529	ACTG1	1.28494e-08	0.893563
4.38687e-35	0.624901	AIM1	5.57719e-84	1.22257	TRAF3IP3	1.44805e-61	0.911718	NR4A21	2.18957e-48	0.458005	ADAM19	1.47501e-98	1.25811	RPL18A	5.18076e-38	2.33411	SMCO4	3.57847e-49	0.708704	ALOX5AP	2.81743e-113	2.25385	SAT1	1.17043e-105	3.84369	CXCR4	2.67893e-93	3.98665	PDIA4	1.7475e-38	1.75351	PKIB	5.17959e-55	1.87021	BCL2A1	7.49828e-175	4.97805	CNRIP1	1.52156e-70	1.37106	FYB	6.5039e-96	0.931193	CCL3	8.14017e-06	13.115	CCL3	1.54791e-08	1.67318
1.02638e-34	0.413998	NR4A2	1.48604e-80	1.2455	TGFBR3	2.27073e-58	1.66028	ASB2	3.85733e-48	0.852503	APOBEC3G	4.43032e-97	2.38199	PRKCQ-AS1	1.16926e-37	1.7781	BCL6	8.52316e-48	2.42562	ANKRD28	3.74478e-111	1.74824	HLA-DRB1	9.71445e-101	3.67907	CXCR5	2.15691e-92	3.3428	MYDGF	2.25663e-38	1.12412	HLA-DMB	5.94531e-55	2.68222	CCRL2	2.83454e-174	4.2285	TPSB2	6.91593e-70	0.970904	S100A4	1.11411e-95	1.78356	OLFML3	9.48321e-06	4.2693	IKZF3	2.58176e-08	2.10775
2.69967e-34	0.783066	RNF19A	8.63395e-78	1.31792	ADD3	6.70839e-58	0.719083	TNFAIP31	3.46408e-47	1.91098	KRT86	9.05576e-94	1.34022	RPS14	3.76605e-36	0.905882	SARAF	3.77472e-46	3.08669	HOPX	5.95623e-111	1.21678	S100A4	1.92109e-99	3.10066	AFF3	2.38808e-92	4.53623	FNDC3B	7.10473e-38	0.444043	NRARP	5.48946e-54	1.94192	CCL3	2.74822e-168	4.62275	TPSAB1	5.61373e-69	1.45416	ITGAL	1.58759e-95	1.30885	CTSL	1.08081e-05	1.54177	UBC	3.0941e-08	2.52057
2.8479e-34	0.887838	JUNB	5.97452e-77	0.916705	EMP3	1.10371e-53	1.36666	PFKFB3	4.86295e-46	1.34954	PDCD1	1.84606e-92	1.86747	PLAC8	1.75112e-35	1.96548	AHI1	4.52676e-46	1.05265	SCML4	1.6139e-110	0.816682	HLA-A	3.43553e-96	4.46842	NAPSB	7.97698e-89	4.33493	ITM2C	2.82156e-37	1.17157	LSP1	6.17849e-54	2.05409	C15ORF48	1.50037e-160	3.13939	MS4A2	8.27212e-69	2.3136	MEGF9	5.80565e-94	3.10897	SPP1	1.08536e-05	4.61172	LGALS1	3.55943e-08	0.447421
1.22517e-33	0.754179	LDHA	2.14485e-76	1.14227	BIN2	1.35908e-53	1.2911	GPR65	1.0818e-45	1.55565	NDFIP2	2.42863e-87	1.80107	FAM65B	3.00248e-35	1.31148	SLC2A3	2.8971e-45	1.20448	PTGER4	9.84929e-109	3.33472	ZBTB32	1.03059e-95	5.05639	FCRL1	5.32644e-88	3.27696	DUSP5	6.10301e-37	2.83881	IRF4	1.92177e-53	1.69107	SERPINB9	1.46563e-159	1.33951	CSF1	4.37481e-68	1.51026	CSF3R	8.86337e-92	1.5202	SDS	1.17992e-05	4.80749	ADGRG1	3.82182e-08	2.61722
3.98401e-33	0.536834	SRSF7	9.41018e-76	1.58882	ADGRG1	4.36156e-53	0.754567	PABPC11	1.84575e-45	1.26127	SARDH	9.07809e-86	1.18904	RPL19	3.99624e-35	1.8694	PASK	3.2035e-45	1.23434	ID2	1.49335e-106	1.62038	HLA-DRB5	2.0073e-94	5.5727	HLA-DQA2	2.66031e-86	4.44899	ANKRD36BP2	1.28556e-36	1.99132	CLEC10A	9.84267e-52	1.68938	DUSP2	1.10275e-154	2.0381	EPB41L1	1.17937e-67	1.27084	LST1	7.89634e-91	1.51273	CTSB	1.5488e-05	3.44949	ABI3	6.0608e-08	1.84215
1.09448e-32	0.492205	NR4A3	1.99245e-75	3.0417	ITGAM	2.55775e-51	1.19282	NFKBIZ	5.19263e-45	1.10482	MIR155HG	2.26416e-82	1.24383	RPL34	7.2934e-35	1.26051	ITM2A	5.18513e-45	0.827702	PIP4K2A	3.16181e-106	1.66225	CD74	4.46957e-93	2.88302	LINC00926	5.15266e-86	2.91189	PDIA6	1.61403e-36	1.56355	GPR183	4.5037e-51	3.2957	TMEM52B	3.50656e-152	1.96184	IL18R1	8.14127e-67	1.51971	NCF2	4.19229e-90	1.74483	MSR1	2.02292e-05	1.16162	ACTB	6.78722e-08	1.40525
2.41943e-32	0.477658	SARAF	2.73452e-75	1.13762	GIMAP7	8.16268e-51	1.18413	NR4A31	1.33355e-44	0.46755	RGS11	3.13752e-82	1.13312	RPS4X	1.12121e-34	1.52657	FAAH2	6.21909e-44	1.22544	ADGRE5	1.38601e-103	1.97397	MIR4435-2HG	2.73661e-90	4.24977	FAM65B	9.45196e-82	3.01058	RPN1	2.67075e-36	2.32504	CD1A	9.27503e-51	1.37515	NFKBIA	1.16924e-149	1.86959	CRLF2	2.70326e-65	5.49556	PF4	1.16142e-89	0.3456	PLAU	2.12184e-05	10.5706	CCL3L3	7.64827e-08	3.05253
4.17611e-32	0.49637	PDE4B	5.26496e-75	2.18852	A2MP1	1.33408e-50	1.29527	KLRC2	7.18328e-44	1.0992	ZNF683	8.48875e-80	1.31746	RPL31	1.66842e-34	0.361547	CD69	3.72562e-43	1.01425	VIM	1.51317e-98	2.25422	CTSC	5.99682e-89	2.22552	ACTB	1.19282e-80	2.57763	HM13	1.18904e-35	1.70614	PPA1	5.78891e-50	1.80076	ATP13A3	4.64851e-147	1.33348	SMYD3	1.205e-64	1.45123	UBXN11	5.19828e-89	1.89082	FOLR2	4.22184e-05	1.56521	CST7	1.14637e-07	3.00142
5.1399e-32	0.60914	BTG1	1.12184e-73	2.46881	RAP1GAP2	6.48153e-48	1.34158	IL18RAP	2.55897e-42	0.694221	SAMSN11	4.22209e-79	1.2622	RPL11	9.02434e-34	0.624289	RASGEF1B	5.40324e-43	2.34261	A2M	4.71244e-97	1.62197	TBC1D4	1.14954e-87	3.84819	REL	2.15116e-79	2.41461	P4HB	3.451e-35	1.14268	RNASE6	1.46641e-48	2.48027	VEGFA	2.67976e-145	3.02694	LIF	1.87221e-64	1.04171	CYP1B1	1.58664e-88	0.970272	C1ORF54	4.60318e-05	1.58611	S100A4	1.19606e-07	2.41077
2.87416e-31	0.437965	H3F3B	4.19864e-73	1.13664	SYNE1	7.55284e-48	0.778881	ID2	1.13768e-41	0.760475	HLA-DRB5	4.37078e-79	1.53499	RPS5	2.97052e-33	0.753968	FYN	8.066e-43	1.06609	CD40LG	1.15993e-96	2.14311	IL12RB2	1.24104e-86	6.90619	SELL	6.00634e-79	1.93776	SEL1L	1.99131e-33	1.4378	SEL1L3	8.09896e-47	1.89066	ETS2	2.99565e-145	0.721581	AKAP2	3.39713e-64	1.47173	C11ORF21	7.05012e-88	1.92426	MMP9	5.6786e-05	1.0888	ARPC2	1.48598e-07	1.51204
4.06414e-31	0.668606	PIK3R1	2.70215e-71	1.20494	SAMD3	1.09777e-47	1.37459	PDE4A	1.42888e-41	0.616447	ITGAE1	2.3481e-78	1.09423	RPL6	4.5244e-33	1.78769	NAB1	1.40681e-42	1.33393	PPP3CA	4.07415e-94	2.27081	GLRX	1.11439e-85	1.9502	TMSB4X	1.06243e-78	3.78972	CRELD2	1.52798e-31	0.714757	CFL1	1.66711e-44	2.74361	TNFAIP6	3.02512e-145	1.98687	ADAM12	8.52228e-64	0.834375	LYZ	1.10166e-87	0.707207	NRP2	5.82853e-05	2.82735	SYNGR1	1.6997e-07	2.9505
1.01549e-30	1.41557	DKK3	1.46903e-70	1.27913	MYO1F	2.07539e-47	1.51389	RBKS	2.8046e-41	0.793845	CXCR61	2.6567e-77	1.03384	RPS27	2.07813e-32	0.821108	PTGER4	8.29574e-42	0.929609	AHNAK	1.11002e-93	2.8678	GADD45A	1.19564e-82	3.49727	FCMR	1.70173e-78	2.48803	SPCS3	1.62139e-30	0.739245	CACNA2D3	9.82738e-42	2.23761	SNAI1	8.68772e-139	1.10364	COL13A1	4.1245e-63	0.768253	JAML	7.90426e-86	1.40826	RGL1	6.60461e-05	5.7881	FCGR3B	1.74627e-07	1.23512
1.12813e-30	0.624823	SRSF2	3.58175e-70	0.984675	S100A4	2.64188e-47	0.738665	PTPN22	2.07105e-40	0.945787	DUSP10	5.12386e-77	1.04404	RPL21	3.07788e-32	1.31798	FKBP5	7.71122e-41	1.78815	GPR65	4.18548e-93	4.55773	FANK1	7.13178e-82	3.49388	HLA-DMA	7.97764e-78	2.49803	CD63	6.13365e-30	0.698984	LGALS2	7.29191e-41	1.89778	KDM6B	3.53828e-133	1.46604	CLU	5.59931e-63	1.25683	CSTA	4.76873e-85	0.426443	OLFML2B	7.09296e-05	3.24167	ATP1B3	1.78622e-07	1.55619
1.4734e-30	0.787359	TMEM2	1.25993e-68	1.96538	PTGDR	2.49396e-45	0.61872	RASGEF1B1	2.44384e-38	2.011	MKI67	1.77083e-75	1.28273	LDHB	3.53892e-31	1.29603	IL6ST	7.93362e-41	0.438037	TC2N	4.52634e-93	1.67389	GBP5	7.61274e-82	2.88035	SWAP70	2.78497e-75	2.44298	PDK1	6.16577e-30	3.10061	CCR6	1.08907e-39	1.12384	SOCS3	2.27485e-130	0.48885	ENPP3	9.36636e-63	1.5372	C19ORF38	4.56592e-84	1.71019	ACP5	8.07618e-05	2.0077	PPP2R5C	2.25161e-07	2.78714
3.34242e-30	0.585584	CSRNP1	3.30844e-68	0.307021	B2M	2.98892e-45	0.895117	ABCB1	5.67328e-38	0.700037	FKBP1A	1.80553e-75	1.31518	RPS12	1.03109e-30	1.08866	ARID5A	9.65088e-41	0.653795	LCP1	2.66161e-88	1.68681	IL2RB	1.67945e-78	4.49837	SPIB	4.47601e-75	2.52652	DNAJC3	3.34314e-29	1.2321	HLA-DPB2	4.7884e-39	1.58854	PTGS2	3.26158e-129	2.45746	SYTL2	3.94631e-62	1.36391	FAM157A	4.81523e-83	0.58546	MERTK	0.000100129	2.64512	SAMSN1	2.74298e-07	0.782298
4.95985e-30	0.577242	DNAJA1	3.5929e-65	0.905399	C1ORF21	3.25206e-44	2.42055	GPR34	2.5792e-37	2.66552	ETV1	2.76481e-75	2.12439	NOSIP	2.2273e-30	0.427299	RGS1	7.02946e-40	1.04362	RORA	1.06395e-86	1.44786	GK	3.21191e-77	5.41079	CIITA	4.6912e-74	2.34454	SEC61A1	3.97159e-29	2.00816	CST7	3.8048e-37	1.09906	NAMPT	9.89939e-129	2.18741	KCNH2	9.14322e-62	1.17119	ITGB2	1.69722e-82	0.901449	CCL3L3	0.000106915	4.51093	TMEM2	3.5538e-07	1.07958
2.71269e-29	0.631838	HSPA8	5.77459e-64	1.01275	CDC25B	3.45696e-44	0.709347	CD96	1.69339e-36	0.861632	APOBEC3H	3.18179e-75	2.15396	MYC	2.80929e-30	0.91525	ELF1	1.22641e-39	0.915715	ITGB7	4.91335e-86	2.71847	ACP5	2.59387e-76	1.46182	RPS27	5.25928e-74	2.79769	LIME1	4.39996e-29	0.696837	PFN1	3.94197e-37	1.68342	PFKFB3	8.72539e-128	1.02273	TNIK	5.81771e-61	1.29163	SELL	2.17891e-82	1.50734	MS4A4A	0.000112908	0.791306	CFL1	3.68108e-07	2.17591
1.00731e-28	0.797861	TC2N1	1.35099e-63	1.37744	RASGRP2	4.52664e-44	1.66408	MSH3	3.34927e-36	0.780527	ITM2A	1.62942e-74	1.12962	RPL4	3.88839e-30	1.0299	ALOX5AP	4.65885e-39	0.840405	ANXA2	3.05692e-85	3.84579	CD80	1.63822e-75	1.68264	RPL13A	1.49283e-73	2.80223	HSPA5	8.40211e-29	0.756954	PPIA	1.10298e-36	3.15635	CCL20	1.15732e-127	2.12133	CDK15	1.69858e-60	0.974109	AIF1	3.49797e-82	2.6804	MMP12	0.000140051	5.10186	CREM	5.26112e-07	1.68484
1.98921e-28	0.957464	SC5D	2.02138e-61	1.87703	PATL2	2.4461e-43	0.726095	PER11	6.06772e-36	0.593704	HLA-DMA	3.63792e-74	1.42054	GIMAP7	9.68807e-30	2.58524	CXCL13	6.46352e-39	3.03645	KLRG1	7.92633e-84	1.65109	LGALS1	3.19146e-75	2.53585	BTG1	6.32599e-73	2.22385	FAM46C	2.18921e-28	1.16237	JAML	3.24276e-36	4.73431	ACOD1	1.15751e-127	6.82546	TPSG1	3.83649e-60	1.41027	TKT	8.47417e-81	1.26066	PMP22	0.000144204	1.93446	CYTIP	7.8971e-07	3.08615
1.32963e-27	0.617551	FAM177A1	5.70494e-60	1.14164	GZMH	8.96773e-43	0.743661	RGS1	8.24229e-35	1.05731	HLA-DQA1	1.33166e-73	1.24739	RPL30	1.66446e-29	1.3992	MAF	7.56706e-39	3.65793	AUTS2	3.92497e-83	0.436319	B2M	5.0192e-75	5.35544	CD83	2.08491e-72	3.9643	CREB3L2	3.62835e-28	0.483497	CYP2S1	3.48402e-36	3.11025	ADRA2B	2.58702e-126	2.86786	CD69	1.45804e-59	1.65501	NLRP1	7.26167e-80	1.56488	GAL3ST4	0.000145875	8.29293	PHLDA1	1.41719e-06	1.23948
3.05973e-27	0.576705	FOS	1.31704e-59	1.13888	AES	2.19342e-42	0.840702	PPP1R15A1	8.63166e-35	0.884752	LGALS31	7.33524e-73	1.17392	RPS18	7.63112e-29	0.395566	CREM	1.64475e-38	1.6499	BHLHE40	5.5699e-83	1.40941	CD27	6.68065e-75	1.8994	SNX2	2.20441e-71	1.57507	KDELR2	1.05192e-27	0.86065	CLECL1	6.93656e-36	1.77823	UPP1	3.58478e-126	2.77419	NTRK1	2.3971e-59	1.31942	NRGN	1.43162e-79	0.548319	NRP1	0.000146343	4.96498	SPON2	1.59226e-06	1.9625
4.4909e-27	0.490066	TSPYL2	2.18727e-58	0.643768	MYL12A	8.14258e-42	1.25181	PRMT9	1.42369e-33	0.994535	SEMA4A	1.42635e-72	1.09126	RPL23A	4.74541e-28	1.52909	WDR74	4.29846e-38	0.815597	S100A10	1.05731e-82	1.53687	HLA-DPA1	2.7002e-74	2.29767	2022-03-01	2.29041e-71	2.1901	LMAN1	2.48295e-27	0.648772	HINT1	1.29874e-35	1.9693	ITGAX	1.20899e-123	1.24214	HS6ST1	1.15868e-58	1.33459	CFD	2.4003e-79	1.55828	CTSD	0.000153733	1.73272	SLA	1.65346e-06	1.07749
5.08573e-27	0.450146	MYADM	6.02431e-55	1.30856	RASA3	2.61055e-41	0.870709	BTG21	2.54151e-33	0.644812	LYST1	2.10975e-72	2.43647	ACTN1	1.27988e-27	0.501455	ICOS	1.54217e-37	1.74158	CD69	1.16579e-82	2.57558	VDR	4.09631e-74	4.11827	CCR7	3.11002e-71	2.44311	CD38	4.82713e-27	2.938	DNASE1L3	2.11107e-35	1.51489	MXD1	1.29361e-120	1.2239	GRAP2	3.02742e-57	0.773087	SLC11A1	1.55063e-78	0.41249	LHFPL2	0.000155086	1.76022	CSF1R	1.65365e-06	1.94902
9.63125e-27	0.396869	ZNF331	8.14651e-54	0.59355	KLF2	4.52967e-41	1.01061	FOSL21	3.2818e-33	0.97963	CPNE7	2.05127e-71	1.32598	RPLP2	1.3403e-26	1.63998	SH3TC1	1.02735e-35	1.01298	ZFP36L2	7.15959e-82	1.36612	GBP2	3.04901e-73	2.97445	ITPR1	3.22098e-70	2.31559	DNAJB9	6.21377e-27	2.00763	PLAC8	5.24107e-35	3.18829	LYPD3	1.93535e-120	1.52355	PZP	1.82425e-56	1.61833	SMAP2	1.23372e-77	2.49899	ADAMDEC1	0.000169013	2.06204	RARRES3	2.05772e-06	1.35617
7.32702e-26	0.446009	TSC22D3	1.2402e-53	1.20772	STK38	1.34876e-40	1.19831	MAP3K8	1.90505e-32	1.05377	SIRPG1	9.88396e-70	2.01448	RASGRP2	2.89967e-26	0.622592	JUND	1.03903e-35	1.6812	CAPG	3.11418e-81	8.58767	CD177	1.37201e-72	3.46126	LCP1	5.17632e-70	2.5171	RPN2	8.77227e-27	0.625059	TMSB4X	7.9083e-35	1.64275	NR4A3	2.39881e-120	3.65285	IL1RAPL1	1.53019e-53	1.20896	CTSS	2.65717e-77	0.965271	CCL4	0.000177069	6.16774	GTF3C1	2.37678e-06	3.2378
1.50695e-25	0.973829	ANXA1	3.98303e-53	1.10967	TSPAN32	2.27133e-40	0.756088	JUND1	2.1266e-32	0.61705	SLC27A2	1.80962e-69	1.54307	AES	4.80875e-26	1.49034	USP36	3.23605e-34	2.98743	ABCB1	1.14172e-80	2.81832	CRADD	4.47325e-72	4.08313	TRIM22	2.66647e-69	2.75815	RABAC1	2.13812e-26	0.590276	RPS5	1.59217e-34	1.89656	METRNL	6.49172e-120	0.318858	C1ORF186	1.688e-53	1.10533	TXNIP	5.1118e-77	0.682618	CXCL3	0.000252804	7.31536	RAPGEF1	2.40025e-06	2.18077
1.85115e-25	0.590386	DUSP1	4.56508e-51	2.5623	OSBPL5	2.78467e-40	1.04138	CD101	4.6727e-32	1.34399	GEM	1.88327e-69	2.05985	MAL	9.41476e-26	1.04017	PER1	1.16051e-33	0.637462	RARRES3	1.94048e-80	2.12131	CD79B	6.60593e-72	1.77001	CFL1	5.28047e-69	6.68366	CHPF	2.95852e-26	1.23831	CXCR4	3.9138e-34	0.859632	MALAT1	9.07543e-118	0.776458	CTTNBP2	3.49174e-52	2.40674	CLEC1B	1.35096e-76	3.43804	TDRD6	0.000266547	5.01401	GADD45B	2.52059e-06	1.45201
2.14479e-25	0.708933	RALGAPA1	2.12176e-50	1.02042	CCND3	6.76248e-40	0.736716	HOPX	5.80507e-32	0.589666	CD741	1.42881e-68	1.22788	RPL10A	2.36801e-25	3.01031	CD200	4.9425e-33	0.473152	CRIP1	2.3616e-80	2.03652	HTATIP2	1.13723e-71	2.20522	ARHGDIB	1.13385e-68	3.3902	HIST2H2AA4	1.06025e-25	0.61425	ADAM28	4.1966e-34	1.88045	EHD1	1.16422e-116	2.65992	DLC1	5.19976e-52	1.54687	MIS18BP1	6.09734e-75	1.51432	CMKLR1	0.000268974	1.17029	SH3BGRL3	2.59009e-06	4.52835
4.89496e-25	0.715527	USP36	1.33457e-49	0.822409	PRF1	1.30867e-39	1.07511	PELO	1.72815e-31	0.281567	PAG1	4.08615e-68	2.45855	TCEA3	5.92003e-25	1.36443	ATP1B3	7.05177e-33	0.896938	TMEM71	4.35969e-80	1.771	DNPH1	6.13946e-69	2.71127	BLK	1.47211e-68	2.00983	SPCS1	1.64651e-25	1.35659	SLC41A2	6.35768e-34	3.04857	ALDH1A2	8.69748e-112	0.714678	ITM2C	7.13503e-52	1.03393	SERPINA1	7.01008e-75	0.618653	ADAM9	0.000286455	6.5805	ATXN1	2.64565e-06	1.59814
5.64981e-25	0.783006	SLC38A2	5.1277e-49	1.22851	P2RY8	1.61335e-38	1.54804	FURIN	4.5405e-31	1.48505	TNFRSF18	9.45799e-68	1.11036	RPL18	1.30207e-24	1.52914	ICA1	1.29676e-32	1.50115	LYAR	5.26837e-80	3.23561	GCNT1	1.33785e-68	3.49597	B4GALT1	4.94477e-68	3.10384	MEI1	2.80062e-25	1.06001	CD86	7.87673e-34	1.43903	PNRC1	2.2412e-109	1.49793	LGALS12	9.44332e-52	1.36017	IL17RA	2.29624e-74	0.583643	A2M	0.000322388	2.191	DOK2	3.03281e-06	0.995587
8.69317e-25	0.421253	TNFAIP3	7.13252e-49	2.87948	VCL	2.42414e-38	2.37246	B3GNT7	1.00096e-30	1.30832	NELL21	1.80975e-67	1.18445	RPL14	2.10393e-24	0.70961	FAM46C	2.059e-31	0.827004	GPR171	4.90749e-78	2.45258	TYMP	2.13376e-68	5.06131	PAX5	6.72586e-68	1.99807	SPCS2	2.92571e-25	0.671535	RPL10A	1.9774e-33	2.3626	CXCL3	9.30595e-109	2.90281	RGS13	1.43971e-51	1.78043	GIMAP7	6.79972e-74	1.04087	ENPP2	0.000333855	1.08271	FYN	3.50044e-06	0.972844
9.50672e-25	0.670704	JMJD6	7.53819e-49	0.892006	UCP2	2.70675e-38	1.01265	RANBP2	1.43753e-30	2.49894	CTLA4	2.61313e-66	1.45815	GIMAP5	3.60822e-24	0.891161	SDCBP	3.60169e-31	1.62313	MYADM	1.81063e-77	2.95059	PHLDA2	7.07635e-68	2.38708	EBF1	8.6026e-68	2.55561	SRPRB	3.24187e-25	0.684354	RPS3A	2.05317e-33	1.69653	IVNS1ABP	2.81447e-108	3.29203	ADAMTS7	2.12585e-51	1.16105	EVI2B	1.24528e-73	0.538562	SPRED1	0.000341348	5.62622	S1PR5	4.68067e-06	1.50133
1.03606e-24	0.976494	PLK3	8.04024e-47	1.1798	ADRB2	9.99622e-38	0.745969	CSRNP11	2.39492e-30	0.809588	CD38	8.19184e-66	1.43215	EEF1B2	5.1008e-24	0.794847	EZR	3.63226e-31	0.893449	OSTF1	1.34825e-76	1.1127	GAPDH	1.15361e-67	2.34584	PTPRC	4.36142e-67	1.93122	SEC61B	6.03228e-25	0.769419	HLA-DRB6	6.97204e-33	2.18467	SPHK1	1.97117e-107	1.10279	PTGS1	3.44138e-51	1.87864	NACC2	1.26452e-72	0.85473	TSPAN15	0.000388589	2.18427	SDCBP	4.83878e-06	1.12488
1.25143e-24	0.545063	FAM46C	1.61216e-45	1.22235	ST6GAL1	2.37887e-37	0.523844	RPLP1	5.25812e-30	2.21435	MYO5B	8.75067e-64	1.16765	RPS13	8.5359e-24	0.589333	KLRB1	7.11847e-31	1.79144	DPP4	1.58097e-76	3.75221	EBI3	3.13825e-67	3.13176	PARP15	5.407e-67	9.13492	IGLL5	1.17136e-24	0.926039	ARL4C	1.93376e-32	1.50935	CD44	8.13833e-106	1.4301	CD82	4.85494e-51	1.42194	SLC24A4	2.98838e-72	0.806441	SERPING1	0.000487245	2.38548	SLAMF7	5.23267e-06	1.08421
9.22473e-24	0.789744	IFRD1	4.07899e-45	0.846358	SLC9A3R1	3.09743e-37	0.89546	MYADM1	2.32545e-29	1.00354	TOX2	3.34127e-63	1.18863	RPS9	9.4263e-24	0.548565	EIF1	3.56777e-30	1.04438	CLEC2B	2.19305e-76	7.05956	IL1RN	9.61374e-67	2.06723	PFN1	7.30138e-67	2.2567	LMAN2	1.62492e-24	0.738217	SUB1	9.59529e-32	2.20897	ACSL1	1.33784e-105	1.4291	KIAA1522	3.22086e-50	0.327187	MITF	5.89893e-72	1.30352	PTMS	0.000489356	2.00716	HSPA8	5.708e-06	0.750781
1.24014e-23	0.526277	EZR	4.81922e-45	0.691089	PYHIN1	7.51984e-37	0.839961	ZNF3311	7.93769e-29	0.398343	OASL1	3.5774e-61	0.902693	RPL8	1.40825e-23	1.11234	SOCS3	3.85804e-30	0.916113	C16ORF54	4.13444e-76	1.47896	PTTG1	1.20331e-66	2.29666	CD53	2.4114e-66	1.95355	CCPG1	1.65328e-24	1.01604	SPINT2	4.62928e-31	1.75272	NFKB1	1.52228e-105	0.731459	CD9	1.10125e-49	0.66158	GM2A	8.61553e-72	0.809946	LGALS3BP	0.000549476	6.17548	MIR4435-2HG	5.93674e-06	1.23431
3.66138e-23	0.604651	DNAJB6	1.64961e-44	1.31124	SH3BP5	2.15719e-36	0.91875	GPR171	1.98021e-28	0.791784	CTSD	4.6203e-61	1.4031	TRAF3IP3	1.636e-23	0.4431	H3F3B	3.94615e-30	1.3524	RBMS1	8.87755e-76	1.54908	PRDM1	1.35935e-65	4.61472	TRAF5	1.26567e-65	2.02204	TMEM59	4.3033e-24	1.42187	DUSP5	4.76673e-31	1.75676	OSM	4.21802e-102	6.09095	GATA1	1.47833e-49	0.402578	TPM4	1.12995e-71	1.55817	GPR34	0.000560659	1.23539	NAPB	6.62935e-06	3.80029
4.1463e-23	1.47094	EPHA4	2.07622e-44	0.489794	RPL7	2.38838e-36	0.944295	RHOC	2.33333e-28	0.421527	TANK1	1.04428e-60	1.12835	S1PR1	2.93167e-23	0.397045	DUSP2	5.56731e-30	1.13118	SNHG16	1.50558e-74	3.69882	ENTPD1	2.55993e-65	6.59428	LY86	4.7839e-64	3.71541	MANF	9.63149e-24	2.21785	SLC38A1	9.06458e-31	1.68236	CD300E	1.35424e-101	1.44813	MLPH	1.01518e-48	0.618575	APOBEC3A	1.72701e-71	0.936878	CD74	0.000576757	0.870171	VAV3	6.78726e-06	1.54833
4.24952e-23	0.883114	ITPRIP	3.24853e-44	1.57015	CEP78	3.0084e-35	0.700346	EGR11	8.2509e-28	2.11154	TNFRSF9	1.04957e-60	4.57293	IGF1R	3.53205e-23	0.81009	DDIT4	9.03275e-30	3.36272	CD300A	7.38442e-74	2.28905	LY75	2.88712e-65	1.59146	PIKFYVE	7.57346e-64	2.30777	TXNDC11	1.07914e-23	1.24697	CHAF1A	1.52248e-30	2.30314	CYB5D1	1.73761e-101	1.06121	DUSP10	1.03531e-48	1.2893	GIMAP4	1.04071e-70	0.815262	CREG1	0.000592062	1.31308	PRF1	6.82972e-06	4.04774
8.78055e-23	0.591948	SLC7A5	2.63488e-43	1.70573	CD300A	3.38563e-35	0.479484	RGS2	3.0887e-27	0.483544	HLA-DPA1	5.78312e-60	1.33788	LIMD2	4.44351e-23	0.902306	STK17A	5.70841e-29	0.374519	S100A4	7.9916e-74	1.79562	PHLDA1	3.07451e-65	4.61171	MTSS1	1.69526e-63	2.01031	TMED2	3.16115e-23	0.665173	GSTP1	1.65107e-30	1.49814	TREM1	2.70905e-101	1.54135	ACSL4	5.1284e-48	1.79081	GPBAR1	1.64417e-70	1.18593	FABP5	0.000615885	0.889738	UBB	7.6855e-06	1.32058
1.26002e-22	0.790329	HNRNPLL	3.35203e-43	1.2094	CMC1	4.03664e-35	1.39257	ADRB1	5.72974e-27	0.514748	BHLHE401	6.46873e-60	1.09422	RPS2	4.73044e-23	2.36436	PDE7B	8.33427e-29	0.876285	LINC01138	1.15546e-73	2.27939	CD274	3.73574e-65	3.37107	VPREB3	3.90193e-63	2.02231	HDLBP	3.21042e-23	3.19446	FCER1A	3.73954e-30	2.58741	THAP2	3.73229e-101	2.47248	KLRG1	1.29763e-47	1.70471	RCSD1	1.39418e-69	0.883357	HLA-DRB1	0.000631207	6.96266	RGS1	7.81493e-06	1.77504
1.36807e-22	0.539347	HSP90AB1	4.93082e-43	1.50691	LILRB1	1.80026e-34	0.487791	CLDND11	8.04793e-27	1.21129	ZNRF1	1.04133e-59	1.18372	RPS23	6.47663e-23	0.742781	TRAT1	8.57379e-29	2.91127	ADRB2	1.52164e-73	4.40326	CSF2RB	1.19161e-64	1.1812	EEF1A1	5.01404e-63	1.80979	UBE2J1	1.51813e-22	0.544959	EEF1B2	1.02618e-29	1.98679	LDLR	2.76283e-100	1.42687	EPAS1	2.26027e-47	1.95643	CD36	2.05898e-69	0.580469	C15ORF48	0.000658008	1.90679	TNFRSF1B	8.29657e-06	0.842553
3.45331e-22	1.00233	HSPH1	1.46086e-42	1.30479	RPS6KA1	2.75355e-33	0.622344	MCL11	8.79269e-27	1.32211	CCR1	4.91124e-59	1.66694	ATM	8.08939e-23	0.823687	FYB	1.58973e-28	4.36418	NKG7	1.64598e-73	2.57749	SDC4	6.30473e-64	1.64368	RPS3A	8.39878e-63	2.89005	CALU	1.57881e-22	0.465366	GABARAPL2	1.23716e-29	1.35422	CFLAR	3.11832e-100	1.89263	LMNA	6.73635e-47	1.75838	NFE2	4.92786e-69	1.04337	MMP19	0.00073242	0.551417	DMC1	8.72601e-06	0.801375
4.20204e-22	0.620177	ATP1B3	1.779e-42	0.479459	PFN1	1.02374e-32	0.984117	TIPARP1	1.02338e-26	0.617661	CD631	1.72289e-58	0.842603	RPL15	1.12721e-22	1.43065	SC5D	4.50811e-28	0.531077	CD96	1.02957e-68	2.32662	SYNGR2	2.2163e-63	1.47827	RPS3	2.26173e-62	2.21411	HERPUD1	1.86735e-22	1.53731	CST3	1.64767e-29	1.44248	SEMA6B	5.36712e-99	2.30359	TESPA1	1.48679e-46	1.64783	SIRPB1	1.14476e-68	1.27275	FTL	0.000745105	0.786712	LCP1	8.78085e-06	1.6347
1.5655e-21	0.456694	CCNH	2.84356e-42	1.41427	TTC38	1.32921e-32	0.901234	REL	2.32999e-26	1.42891	TBC1D4	3.84854e-57	0.945206	RPS27A	6.0522e-22	1.62362	DUSP6	6.59058e-28	1.17477	JAML	1.40676e-68	1.24135	ENO1	1.29158e-62	4.36728	SNX29P2	2.49151e-62	1.45788	FNDC3A	3.6677e-22	0.776278	ACTG1	3.39863e-29	0.474306	SEMA4F	1.7985e-98	0.765144	GMPR	1.80428e-45	0.96829	AHI1	1.48694e-68	0.938803	ATF3	0.000752761	0.901908	MYL6	9.545e-06	0.929622
1.92259e-21	0.72562	DDIT3	2.86866e-41	0.910829	FLNA	1.90722e-32	0.46715	ABLIM1	2.90254e-26	0.977605	TTC24	4.20832e-57	1.78752	C1ORF162	1.50232e-21	0.771973	TIGIT	7.78813e-28	2.45374	CYB561	3.05194e-67	2.66328	ID3	1.61744e-62	3.10022	SP110	4.25151e-62	1.98435	GSTP1	4.1832e-22	0.711992	RPLP0	5.95913e-29	1.94545	THBD	2.5536e-98	0.273026	FCER1A	3.33439e-45	0.258188	PTGS1	3.32723e-68	1.24899	TMEM37	0.000781744	3.44284	IFI6	9.77224e-06	1.09756
2.23236e-21	0.830544	AMD1	3.66396e-41	0.743621	MBP	4.55622e-32	0.64227	YPEL51	3.12075e-26	1.04404	RUNX21	5.14234e-57	3.12938	AIF1	2.19789e-21	1.31942	BCAS2	9.22168e-28	2.64719	IL18RAP	5.15012e-67	1.63116	DUSP10	2.91811e-62	7.42865	HLA-DOA	1.95507e-61	5.63029	CCR10	4.95042e-22	1.87151	PARM1	1.24805e-28	0.835773	CCL4	1.13511e-96	1.82209	LEO1	8.75978e-45	1.6991	RASGRP2	3.78954e-68	0.915531	HLA-DRA	0.000821254	6.17803	BCL11B	1.1193e-05	1.31389
2.62041e-21	0.95743	SOCS3	6.2331e-41	0.494974	TMSB10	1.38585e-30	0.565083	CKLF	6.40988e-26	0.355489	BTG3	1.54056e-55	0.99914	RPL27A	2.46248e-21	0.537058	PPP2R5C	2.01366e-27	1.04619	PTPN4	1.07751e-64	1.76825	IL1R1	1.34672e-61	2.43114	LIMD2	5.55878e-61	2.49874	KDELR1	5.19919e-22	0.591917	RPL18A	1.30065e-28	1.59731	TRAF1	1.44064e-96	1.32277	ADCYAP1	9.18339e-45	0.459525	BMP2K	9.59378e-68	0.932692	HLA-DRB5	0.000911601	1.54671	RGS2	1.16934e-05	1.58153
3.06336e-21	0.542809	SERTAD1	1.49056e-40	1.14319	SYTL1	1.49456e-30	0.851464	SLA2	1.1042e-25	0.447536	PTTG1	5.46747e-55	1.74893	ABLIM1	2.98175e-21	0.556799	PTPRC	2.06621e-27	1.0467	CDC42EP3	4.62602e-64	1.93159	SLC35F2	5.5613e-61	2.38181	CORO1A	1.99286e-60	1.81401	DNAJC1	7.64302e-22	0.537098	RPS18	2.83891e-27	1.70677	SAMSN1	2.10063e-96	1.26649	LAT	1.49626e-44	0.927932	CYBB	1.03647e-67	2.76574	HSD17B14	0.000912816	4.95904	FGFBP2	1.41531e-05	0.255591
7.30939e-21	0.571873	PER1	1.45813e-39	0.594756	CTSW	2.12021e-30	0.844899	RGPD5	1.41391e-25	1.2042	CSF1	6.69695e-55	1.03044	RPS10	5.893e-21	0.835765	CNOT6L	4.3828e-27	0.799439	GLIPR1	5.55784e-64	1.21945	ARID5B	1.65469e-60	1.57151	PTMA	4.02615e-60	2.20032	PSAP	1.06165e-21	0.999062	CTSH	3.20365e-27	1.64499	FLNA	5.40988e-95	2.36701	CADPS	1.73737e-44	1.68762	LTA4H	1.10657e-67	1.31566	SLC40A1	0.000928671	4.28283	MT2A	1.42773e-05	1.45322
1.28849e-20	0.75848	NEU1	2.66022e-39	0.999663	EFHD2	8.13251e-30	1.40659	ENTPD1	2.26896e-25	0.941435	CCND2	4.86562e-53	2.42188	TRABD2A	6.93364e-21	0.692203	CLK1	6.28566e-27	0.396504	TRAT1	7.08452e-64	1.91445	IL21R	3.20847e-60	3.28009	PKIG	1.68731e-59	3.01856	MANEA	1.30427e-21	0.55935	DBI	8.37291e-27	1.84841	ELL2	2.1717e-94	1.19659	P2RX1	2.47336e-44	1.87075	MAP3K3	2.43017e-67	0.617195	CXCL8	0.00100268	1.58046	LCK	1.44867e-05	4.22298
1.7957e-20	0.364017	PMAIP1	2.77571e-39	0.355488	SHE	1.85541e-29	0.824172	CD551	2.30963e-25	0.576873	NAMPT1	5.60379e-53	1.09697	RPL29	1.46087e-20	1.43838	SLC9A9	6.41788e-27	0.357836	GIMAP7	1.30005e-63	1.4018	HSPA1A	3.73109e-60	1.38276	RPL31	1.06607e-58	1.79107	TMED10	1.33353e-21	0.616798	CIITA	1.23408e-26	2.18684	TNIP1	3.56358e-94	1.31213	CD22	3.20353e-44	0.914608	GABBR1	6.92129e-67	0.830861	IL4I1	0.0010196	4.53257	CX3CR1	1.51381e-05	2.20991
1.8956e-20	0.754029	TOB1	2.79915e-39	0.679545	LIMD2	2.27362e-29	0.831014	GPR18	3.19125e-25	0.58147	PKM	1.55641e-52	2.03916	TMEM204	1.52889e-20	1.05254	PRMT9	7.30181e-27	1.17451	TSEN54	4.29351e-62	1.9049	HLA-DMA	8.98834e-60	1.43956	RPS6	4.51225e-58	2.9032	NUCB2	1.61521e-21	0.577512	RPL15	1.29077e-26	1.54613	LCP2	9.81479e-94	0.629589	SYTL3	5.72737e-44	1.2564	LMO2	8.28071e-67	0.654169	AKR1B1	0.00107285	1.72004	VIM	1.66076e-05	1.98959
8.21507e-20	0.758319	DTHD1	1.09488e-38	1.25999	C11ORF21	5.19823e-29	0.517369	SAMSN1	3.43247e-25	0.578647	HLA-DMB	7.02277e-52	0.972511	RPS25	3.47503e-20	1.18139	SH2D1A	1.98535e-26	0.783517	ARHGAP15	9.35167e-62	2.1281	ATP13A3	1.43427e-59	1.46361	RPL7	6.95905e-58	2.37756	ALG5	2.47419e-21	0.814585	TRAF4	1.52817e-26	2.75794	IRAK2	1.72107e-93	1.7489	STAP1	2.58116e-43	1.85217	PECAM1	1.66264e-66	1.90179	CCL18	0.00115544	2.23775	CYCS	1.67296e-05	0.983428
1.04941e-19	0.468291	MCL1	5.73684e-37	1.09249	EOMES	7.99864e-29	1.63717	UBASH3B	7.78604e-25	1.35209	SQLE	2.98575e-51	1.08631	RPS20	9.30072e-20	0.77099	EML4	2.29249e-26	0.635619	PDIA3	4.88802e-61	1.70276	NAMPT	4.5698e-59	1.28243	MT-CO3	4.11678e-57	1.43292	LGALS1	7.7557e-21	0.497109	RPL19	2.69106e-26	1.91467	CSRNP1	2.03264e-93	1.52629	ABCC4	1.35406e-42	0.615651	S100A6	1.14293e-65	0.964878	ACP2	0.001157	0.485971	TCF4	1.83421e-05	1.26995
1.17083e-19	1.63318	TSC22D2	8.89364e-37	1.26393	FCRL3	1.34937e-28	0.97551	MGAT5	1.68386e-24	0.678574	ANXA5	5.56703e-51	1.10124	GIMAP4	1.07648e-19	2.02188	SGK1	2.4521e-26	0.848813	KLF6	6.71205e-61	1.35023	FAM129A	1.35873e-58	2.06237	KIAA0922	1.70046e-56	2.65041	UAP1	1.18561e-20	0.491856	NME2	4.32835e-26	1.62741	WTAP	3.33702e-93	3.19004	ERG	1.52921e-42	1.62766	ATG16L2	1.34568e-65	1.23026	CD68	0.00119203	2.93407	PPP1CB	2.06953e-05	1.54608
1.34742e-19	0.752638	SLC2A3	1.54836e-36	1.03062	HMGN3	6.96477e-28	0.877633	KDM6B1	1.75123e-24	0.515004	CD70	1.35323e-50	1.47974	FOXP1	2.31645e-19	1.44675	DTHD1	4.04277e-26	0.919222	C9ORF142	1.68591e-60	1.11144	HLA-DPB1	1.62471e-58	1.36814	RPL23A	2.46924e-56	1.87856	OSTC	1.84503e-20	0.971007	TOMM34	6.46494e-26	2.26802	ADORA2A	3.47417e-92	2.71763	LAX1	1.99701e-41	1.09645	RAB24	2.52555e-65	1.61568	ME1	0.00120538	1.11584	ILDR2	2.14015e-05	1.20528
1.89485e-19	0.920016	HSPD1	3.52516e-36	1.07401	PIK3R5	3.14048e-27	0.742579	SCML4	4.91387e-24	0.878432	TNFSF10	2.02772e-50	4.5343	AK5	3.58961e-19	1.22683	RAPGEF6	5.46075e-26	1.13384	GLIPR2	3.30365e-58	3.74083	SLCO4A1	8.72843e-57	3.51144	CD82	1.0934e-55	1.9193	DDOST	1.99871e-20	0.362999	SUSD3	6.92348e-26	0.486642	NEAT1	7.6826e-92	0.883131	PIK3R6	2.91026e-41	0.933935	NBPF9	8.3095e-65	1.02232	HLA-DQA1	0.00124995	0.354164	VANGL1	2.37735e-05	1.97066
2.34892e-19	0.591848	EML4	8.58596e-36	0.550551	LITAF	3.14087e-27	1.33561	AHR	5.08677e-24	0.947165	TTN	4.00617e-50	1.07959	RPL12	3.83461e-19	1.01159	PNPLA8	8.87104e-26	2.41092	CTSH	3.88327e-58	2.15752	MAP1LC3A	8.91351e-57	1.53703	RPL32	2.18144e-55	1.57878	TRAM1	2.84649e-20	0.540452	MYL12A	7.14582e-26	0.426278	CRTAM	5.64003e-91	1.83022	RHOBTB3	1.09982e-40	1.59986	STK38	1.17505e-64	1.09367	HLA-DQA2	0.00125235	0.997596	FTL	2.48199e-05	1.49378
3.12754e-19	0.80584	CHD1	1.89686e-35	0.685284	ARHGAP25	4.88987e-27	0.627025	KLF61	6.34296e-24	0.630447	IFI27L2	4.28744e-50	0.901209	RPS29	4.32944e-19	1.06638	CTLA4	1.78506e-25	2.07549	GPR15	5.82519e-58	1.06904	LGALS3	1.84049e-56	1.5791	RPL30	3.81206e-55	4.68983	SPAG4	3.2312e-20	0.432408	HDAC9	1.25146e-25	1.27957	CDKN1A	1.34021e-89	1.39225	SOCS1	1.31226e-40	0.826037	AHR	2.96164e-64	1.40661	APOC4-APOC2	0.00126648	1.13839	HSP90B1	2.81776e-05	0.748655
9.71824e-19	0.773895	HSP90AA1	4.09449e-35	0.751822	SASH3	5.31738e-27	1.57914	XCL1	3.90682e-23	0.928698	FUT8	7.77522e-50	2.11296	LINC01550	2.1546e-18	1.19942	ARAP2	3.09496e-25	0.607202	S100A6	1.79515e-57	1.18647	PIM2	5.06309e-56	2.33425	MYL12A	6.9896e-55	2.17959	ERLEC1	4.05461e-20	0.711191	CYTIP	2.23327e-25	1.42745	NFKB2	2.03784e-89	1.52507	IL9R	1.35672e-40	0.814774	ALCAM	9.31703e-64	0.802345	LACC1	0.00135769	5.26745	OAT	2.85735e-05	0.932925
1.27307e-18	0.880773	GPCPD1	7.06086e-35	0.431779	RPS3	5.33744e-27	0.532051	NPIPB5	5.30536e-23	0.5844	ALOX5AP1	2.52151e-47	1.69298	LINC00273	3.10561e-18	1.24939	ASAP1	3.37819e-25	1.56166	ITGA1	2.68506e-57	3.21989	LAPTM4B	8.19995e-56	1.15488	RPL21	4.59275e-54	3.2643	SEMA4A	5.88504e-20	0.585997	BID	2.25129e-25	0.704703	SAT1	5.14415e-88	1.01807	ELL2	3.81995e-40	1.02252	LIMD2	1.37844e-63	0.967359	TMEM86A	0.00136458	1.30162	FTH1	2.99004e-05	1.20405
1.55139e-18	0.528341	ARID5B	1.23206e-34	0.406774	RPL3	6.75484e-27	0.28017	TMSB4X	5.9135e-23	1.15071	HSPB1	1.79866e-46	1.49866	KLF2	6.04149e-18	1.42575	DCTN6	3.96182e-25	2.4485	IL4I1	4.81875e-57	3.48765	HLA-DQA2	1.19268e-55	1.74598	TTN	4.95726e-54	3.19103	GAB1	6.32578e-20	0.907576	IL1R2	2.35551e-25	2.02773	SLC25A37	5.36044e-88	1.33193	PRG2	5.82512e-40	1.68852	RGS18	3.12753e-63	0.760173	UGCG	0.00137363	8.94105	MIAT	3.09413e-05	1.17582
2.82262e-18	0.579432	BIRC3	1.29118e-34	1.05662	CCM2	1.20316e-26	1.01066	PPP1CB	9.27052e-23	0.71962	FASLG1	2.50946e-46	2.32484	PDK1	7.11282e-18	0.83478	RGCC	4.06112e-25	2.37066	TGFBR3	6.24921e-57	1.39395	RHOC	4.84143e-55	1.5039	CD79A	5.89414e-54	2.53425	CHID1	7.60783e-20	0.653563	CBX6	5.58233e-25	2.07449	AREG	1.52867e-87	2.11938	ITM2A	5.85651e-40	1.57787	PLXNB2	1.35506e-62	0.832458	HLA-DPA1	0.00138247	3.02165	DUSP4	3.12608e-05	1.15305
5.91822e-18	0.575644	ADGRE5	1.57307e-34	1.32885	THEMIS2	1.26554e-26	0.751765	G3BP2	2.61998e-22	0.636967	PRDX6	2.75187e-46	5.36558	CA6	1.07302e-17	0.285528	ZFP36	8.1604e-25	0.721453	STAT4	1.03417e-56	1.16984	BIRC3	1.15571e-53	2.50366	CD19	8.20749e-54	1.05191	PLPP5	9.28842e-20	0.567408	RALA	9.0982e-25	0.858154	FOSB	2.86238e-87	0.445323	EMID1	6.18996e-40	2.24734	SH2D3C	1.43243e-62	0.515583	CXCL2	0.00143278	3.09583	TIGIT	4.16603e-05	1.14212
8.33465e-18	0.550226	TUBB4B	1.62866e-34	0.759839	FRG1HP	3.86684e-26	0.662444	OSTF1	3.74808e-22	0.544018	TIGIT	3.16152e-45	1.06526	RPL23	1.63749e-17	0.789402	AKAP13	3.1269e-24	0.501855	TAGLN2	5.35794e-56	1.50029	RHBDD2	1.38569e-53	4.6192	PLEKHG1	1.40151e-53	1.67266	B4GALT3	1.09911e-19	0.627082	ALDH2	1.91925e-24	2.14032	GPR132	3.21227e-87	1.25398	TSC22D1	1.15287e-39	1.56394	RAB3D	2.8124e-61	0.626371	HLA-DQB1	0.00149598	2.69497	NCF2	4.19795e-05	1.03239
8.85035e-18	0.543891	JUN	2.76976e-34	1.1938	PRKCB	4.25583e-26	0.573083	IL7R1	5.75238e-22	0.775057	BATF	4.59605e-44	1.42471	LRRC75A	2.10932e-17	2.06331	FABP5	3.18655e-24	0.347505	GIMAP5	2.07498e-55	1.80705	SLC16A1	1.79528e-53	2.14498	ARPC3	6.26015e-53	2.10084	HSPA13	1.11196e-19	0.729559	ENO1	7.95567e-24	1.2491	CD83	2.30843e-85	3.06924	STXBP6	2.20542e-39	0.402831	EDEM1	6.19057e-61	1.06908	SUCNR1	0.00151282	1.36031	AUTS2	4.2187e-05	1.85354
1.35364e-17	0.57459	SLA	7.83963e-34	0.69457	LIME1	1.00079e-25	0.521282	NEDD9	6.1802e-22	0.922355	SCCPDH	5.9505e-44	2.42413	ITGA6	2.13089e-17	1.20192	SARDH	4.10351e-24	0.494859	IFITM2	3.22408e-55	0.823008	IL2RG	1.84973e-53	2.57964	COTL1	9.44416e-53	2.23835	PIM2	1.6256e-19	1.0373	C1QBP	8.49518e-24	2.94884	SLC7A5	3.37809e-85	2.14331	SLC9A5	2.42147e-39	1.70527	LILRA2	2.41131e-60	0.974984	LIPA	0.00160081	4.74113	FAM118A	4.4049e-05	1.2029
1.35717e-17	0.7836	GGA2	5.63861e-33	2.89991	PRSS23	1.30556e-25	0.650732	PDCD4	9.05464e-22	0.29063	HMGB2	6.84964e-44	0.908779	RPSA	2.67766e-17	0.982451	HIF1A	6.99236e-24	0.623663	ARRB2	6.91558e-55	2.09867	HS3ST3B1	4.42766e-53	1.33085	RPL19	3.25416e-52	2.20616	ERGIC3	1.83449e-19	1.09769	DAPP1	1.12478e-23	1.69784	RNF19B	4.60978e-85	1.32458	TSPYL2	3.8815e-39	1.18094	PLCB2	5.02457e-60	1.45355	CLDN1	0.00163114	2.84171	PAK2	4.48529e-05	1.44778
1.65159e-17	0.639274	SH2D1A	5.8927e-33	1.45605	C1ORF162	1.34506e-25	0.602779	BRE	1.11425e-21	0.614257	IDH2	1.08272e-43	0.814889	RPL37	1.21737e-16	0.65872	CD6	7.71558e-24	0.40053	TMSB4X	7.17827e-55	1.02043	PELI1	3.47935e-52	5.08832	MGAT5	1.69703e-51	7.59928	HIST1H2BG	2.02242e-19	0.543163	CLIC2	4.13131e-23	3.48343	MIR3945HG	7.44723e-85	4.50065	ZBTB32	6.58461e-39	1.88646	CDA	1.57153e-59	1.13881	CD276	0.00171312	2.05234	SH3KBP1	4.55589e-05	2.25938
1.6968e-17	0.347913	PPP1R15A	6.67836e-33	0.691489	PRMT2	1.38962e-25	1.68966	ADAM28	1.48391e-21	0.955342	RGS21	1.50959e-43	1.17691	LUC7L3	1.34069e-16	0.519754	DUSP5	9.17452e-24	0.53899	MYL12B	1.02465e-54	1.07428	GRINA	9.74525e-52	3.26907	LRRFIP1	2.47722e-51	2.28151	STT3A	2.57141e-19	1.81213	IDO1	4.25138e-23	1.17775	LITAF	3.18998e-83	1.32938	SDPR	7.59766e-39	2.06391	S100Z	1.63151e-59	1.16627	ABL2	0.00177353	3.62299	HLA-DQB1	4.56494e-05	2.6805
2.00584e-17	0.579874	IDI1	8.14929e-33	0.774757	C12ORF75	1.56185e-25	0.645105	NR3C1	1.85042e-21	0.404269	CLEC2B	2.23991e-43	4.87126	NOG	4.29444e-16	0.539391	TNFSF8	1.43572e-23	1.78789	CTSW	2.87529e-54	1.3018	CXCR6	1.1087e-51	1.2086	RPL13	3.69929e-51	1.38325	TMEM258	2.5845e-19	0.884825	SYNGR2	4.96125e-23	1.14279	NR4A1	2.55795e-82	1.53365	2022-03-03	1.37506e-38	0.688914	MAOB	1.73844e-59	0.865591	SOD2	0.0018437	1.81483	FCRL6	5.05083e-05	1.57468
2.83234e-17	0.840981	TUBB2A	9.86536e-33	2.98089	PLEKHG3	1.65114e-25	1.0878	ATF3	4.0475e-21	0.358206	CRIM1	5.17872e-43	1.78255	PCED1B	6.17828e-16	0.474165	RGPD5	1.67757e-23	0.590741	EMB	4.579e-54	1.72567	ERI1	3.75982e-51	1.4565	RPS23	8.67207e-51	2.16543	TMBIM6	2.63225e-19	1.80733	P2RY14	7.10404e-23	1.1389	PHACTR1	2.74215e-82	1.00754	ACOT7	4.32375e-38	0.942213	PTPRC	2.8176e-59	0.476581	DNPH1	0.00191873	8.2201	PELO	5.69562e-05	0.975164
6.48102e-17	0.547519	SNHG1	1.55406e-32	1.16801	GIMAP1-GIMAP5	2.07152e-25	0.381012	MT-ATP6	5.00078e-21	0.549051	ATP8B41	5.96397e-43	0.952653	RPS7	6.96597e-16	0.468629	PPP1R15A	2.82852e-23	0.551372	PLAC8	5.49152e-54	1.32951	NCF4	4.09101e-51	0.348563	SESN3	2.58662e-50	2.37397	ITGA6	2.91348e-19	0.819023	NHP2	1.29581e-22	1.56044	FOSL2	2.53116e-81	0.692273	TSEN54	5.08744e-38	0.555746	PTPN7	3.15849e-59	0.48299	C3AR1	0.00210222	3.54169	TTC38	6.28768e-05	3.34499
7.60246e-17	0.436627	LRIG1	2.77076e-32	0.791867	TMEM173	5.18992e-25	1.9911	SMIM3	9.04995e-21	0.439619	ADCY3	6.80014e-43	0.893238	RPL17	2.64595e-15	0.828138	DNAJB1	3.31959e-23	4.13625	SLAMF7	1.20876e-53	2.40145	IKZF4	4.41754e-51	1.55655	RPL11	4.73909e-50	1.83623	KRTCAP2	4.80369e-19	0.480715	RPS23	1.46266e-22	1.58349	DSE	3.17533e-81	2.2442	A2M	5.81651e-38	1.68612	MAP3K1	6.53365e-59	0.528728	YWHAH	0.00213109	2.17844	RORA	6.53096e-05	3.06429
8.57131e-17	0.468307	DENND4A	7.40072e-32	0.606929	ITGAL	1.00259e-24	0.563545	CD63	1.13844e-20	0.375009	CCL51	8.82997e-43	2.25679	PRKCA	3.12431e-15	1.27755	MYO7A	3.3296e-23	1.37749	PNP	1.29821e-52	1.65357	DUSP16	7.26122e-51	6.89404	ARHGAP24	8.50783e-50	1.57751	DAD1	4.96213e-19	1.49473	UGCG	4.40212e-22	1.19511	GRINA	1.29529e-80	0.858821	NDST2	7.25898e-38	1.33452	AOAH	6.61296e-59	0.285909	TIMP2	0.00220869	1.49082	HLA-DPB1	7.92343e-05	1.93956
8.7098e-17	0.3445	CLK1	6.1532e-31	1.1082	RAB37	1.03081e-24	2.66185	GFPT2	1.2237e-20	0.399618	CLIC1	2.01457e-42	0.950223	RPS21	3.8592e-15	0.789274	HSP90AA1	5.08814e-23	0.585592	MSN	1.59796e-52	1.64359	BACH1	9.02868e-51	0.767108	MAP4K4	1.72898e-49	1.95822	LAMP2	6.29281e-19	0.885808	ARHGAP5	5.80508e-22	1.271	SLC2A3	1.51486e-79	0.281322	ATP2A3	7.78648e-38	1.34255	ZNF106	9.58029e-59	0.491102	HLA-DQB2	0.00224612	0.894152	OAZ1	7.92414e-05	1.11701
1.01062e-16	2.64293	CCR7	6.8351e-31	1.23903	USP28	1.8275e-24	1.26781	CHD7	2.20042e-20	0.371971	SH3BGRL3	4.05203e-42	2.7882	APBA2	3.98967e-15	0.375113	JUN	1.6904e-22	0.949001	TRADD	3.51808e-51	1.18466	TRAF3	2.86154e-50	2.76672	UCP2	2.3326e-49	2.86764	TPST2	1.09338e-18	0.514598	RPL27	7.96546e-22	1.77557	MMP19	4.38826e-79	2.28947	TCTEX1D1	2.05104e-37	0.324148	SLC3A2	2.12165e-58	0.906271	NPC2	0.0023709	10.4999	IFNG	8.4173e-05	2.15405
1.03685e-16	0.445088	FYN	1.11369e-30	0.722121	AHNAK	2.14226e-24	0.3954	CREM1	2.51428e-20	0.586514	CCDC167	5.87998e-42	0.921887	RPL39	6.13029e-15	0.887556	TSPYL1	3.1756e-22	0.52294	MBP	5.34593e-51	1.10323	CD58	5.22847e-50	2.0728	ZFP36L1	1.52659e-48	5.57133	KCNN3	1.20966e-18	0.45059	RPS11	1.01991e-21	1.14302	TNF	7.21434e-79	1.72273	ANKRD28	4.7853e-37	0.261242	HMGN1	4.95638e-58	0.882087	TMEM176A	0.00239049	11.925	RGCC	8.66334e-05	0.728544
1.18856e-16	0.491253	KPNA2	1.9567e-30	1.01195	AGTPBP1	2.70178e-24	1.53808	PRKCA	3.6769e-20	0.697591	GALNT21	6.30906e-42	1.65926	MIR663AHG	6.281e-15	1.12435	LRRC8D	5.49599e-22	0.500204	HNRNPUL1	9.07947e-51	1.19429	CALM3	6.06416e-50	1.59514	FTH1	2.22355e-48	4.19634	HIST1H1C	1.23405e-18	1.86143	P2RY6	1.21951e-21	1.57807	GPR84	1.03061e-78	3.12498	GCSAML	6.31e-37	1.26603	CLEC7A	5.41417e-58	1.52526	CXCL1	0.00239667	3.25976	RAB8B	8.85533e-05	0.921141
1.45225e-16	0.30155	P2RY81	1.95766e-30	0.564859	LUC7L3	1.36764e-23	0.963062	RGPD6	3.78094e-20	1.07162	ID31	6.57446e-42	0.929818	RACK1	7.92226e-15	0.7416	SKIL	6.50226e-22	0.925411	FLNA	8.81502e-50	1.5301	AKIRIN2	6.84404e-50	4.20857	CCR6	6.12266e-48	1.9654	CPEB4	1.26088e-18	0.428705	RPS6	1.22049e-21	2.15081	SH3BP5	1.46548e-78	1.87787	CMA1	6.51708e-37	0.782804	MCOLN2	5.52222e-58	1.35718	CTSC	0.00248628	0.461267	ZNF33B	9.02699e-05	0.730241
1.81529e-16	0.710049	SAT1	2.10844e-30	0.653905	RAP1B	2.00392e-23	0.655441	SYTL3	4.88597e-20	0.475398	LSP1	1.90785e-41	0.473879	MALAT1	9.46734e-15	0.499748	CSRNP1	8.37357e-22	1.72822	C10ORF128	5.24551e-49	1.10018	TXN	2.83834e-49	1.33161	RPLP2	9.82758e-48	2.06986	SIL1	1.27754e-18	0.482707	RPL10	1.65632e-21	1.85442	USP36	1.99052e-78	0.92611	PPM1H	6.73996e-37	0.553575	DDAH2	7.66477e-58	0.558797	TRPM2	0.00252453	0.862273	LAT2	9.17613e-05	1.40331
2.00433e-16	1.03089	SMAD7	2.36509e-30	0.976092	SPON2	2.16769e-23	0.923113	DUSP5	5.61571e-20	0.278835	SGMS1	2.18939e-41	1.89412	GIMAP1	1.3066e-14	1.03425	IKZF3	1.14259e-21	0.606742	ARL4C	2.62338e-48	1.26948	SH2D2A	3.9574e-49	3.60088	EVL	1.05007e-47	2.10943	BSCL2	1.36179e-18	0.539122	TMEM14C	2.90412e-21	1.17264	NFE2L2	2.30444e-78	0.94769	LAPTM4A	8.55353e-37	0.894803	NBPF10	8.62617e-58	0.686977	FMNL2	0.00256186	3.01651	ZFAND5	9.93892e-05	0.634517
2.69431e-16	1.36203	PGAP1	2.6223e-30	0.391818	PTPRCAP	2.31443e-23	0.772124	SYTL2	8.44012e-20	0.888954	SNAP47	2.37055e-41	3.16368	GPA33	2.15299e-14	0.828056	CD40LG	1.36477e-21	0.30288	CD6	3.17998e-48	0.834162	CLIC1	1.67325e-48	1.35138	RPL9	3.94137e-47	1.80345	HIST1H2AC	1.5386e-18	0.582188	SNX8	4.25505e-21	1.209	PLEK	4.74496e-78	1.58794	ARHGEF6	2.63707e-36	1.39361	EHBP1L1	1.41927e-57	0.723567	GNPDA1	0.00268055	4.02208	ARNTL	0.000104112	1.32579
2.70297e-16	0.764739	PPP1R16B	4.84661e-30	0.831136	IL16	2.39206e-23	0.359845	MT-ND4	2.05619e-19	0.419461	LAG3	5.43965e-41	0.845702	RPL36	2.45769e-14	0.88663	SOCS1	2.05102e-21	1.95183	TNFSF14	1.81371e-47	1.5989	ADAM12	3.05644e-48	7.56446	CR1	4.54479e-47	2.78116	ERN1	1.57033e-18	2.96952	CCR7	2.07745e-20	0.754743	SLC43A2	6.31212e-78	0.995945	VAT1	2.74977e-36	0.944395	TCIRG1	1.91356e-57	1.32317	IL18BP	0.00268736	1.2771	SHISA5	0.00010868	1.22869
3.33341e-16	0.803659	ATG2A	7.51993e-30	1.46331	GSAP	2.63829e-23	0.535517	DUSP11	2.56655e-19	0.615223	ICOS1	5.91238e-41	1.29743	ADD3	3.01324e-14	0.364315	ARID5B	3.86533e-21	0.628648	S1PR1	2.33746e-47	0.767624	MYL6	7.41656e-48	2.29317	ARHGAP17	6.92114e-47	2.06608	CD27	1.72577e-18	0.483692	RPS10	2.90431e-20	1.47846	ZC3H12A	3.01508e-77	3.75687	MAST4	2.93118e-36	0.934972	LILRA5	4.68855e-57	1.24514	TMEM176B	0.0028506	1.4828	TPP1	0.000109026	3.62285
4.80459e-16	1.0669	MAF	7.77418e-30	1.17705	GIMAP1	3.24102e-23	0.377717	JUNB1	8.45876e-19	0.574322	SUPT3H	7.3935e-41	0.945262	RPS15A	3.03908e-14	6.94852	GNG4	4.3631e-21	1.37224	MCOLN2	2.40829e-47	2.24303	C15ORF53	2.85599e-47	3.38667	PLAC8	2.03798e-46	3.00625	HSPA1B	2.72499e-18	0.405749	GSN	3.46444e-20	1.70708	EMP1	3.31504e-77	1.74382	GALNT6	5.29275e-36	0.624266	LRP1	4.79421e-57	0.617336	HLA-DPB1	0.002916	2.38266	HSPE1	0.000109257	0.631105
5.70536e-16	0.935468	PAPD5	7.94322e-30	0.882622	SELL	4.13563e-23	0.483002	IVNS1ABP	1.02321e-18	0.370895	CKS2	9.90724e-41	0.768254	RPLP0	4.00898e-14	0.730823	TSPYL2	8.12313e-21	0.451044	RPLP0	5.30036e-47	0.644376	OAZ1	4.11243e-47	2.22833	SP100	3.25921e-46	2.97507	SLC38A5	3.00191e-18	0.594345	MAD2L2	3.73963e-20	2.00728	MCEMP1	3.98837e-77	0.552531	FER	7.4372e-36	1.60366	SP110	6.46961e-57	0.933881	ABHD12	0.00300135	1.95686	CD151	0.000120709	2.04588
6.49335e-16	0.560335	DNAJB9	1.01366e-29	0.79789	RASSF1	4.19749e-23	0.592855	RIN3	1.17533e-18	0.387969	HERPUD11	2.17924e-40	1.11168	LINC00869	4.58813e-14	1.9113	KIAA1324	1.50172e-20	0.347729	CALM1	6.03102e-47	1.3233	CCND2	6.40344e-47	1.15167	RPL34	3.68617e-46	1.32279	HMCES	3.00254e-18	0.509449	ARPC5	3.96916e-20	1.00872	SLC11A1	5.03156e-77	0.943783	GALC	8.4107e-36	1.49535	S1PR4	9.68493e-57	0.829169	FRMD4A	0.00304155	0.415194	TMEM231	0.000124738	1.64768
7.66463e-16	0.427973	CD74	1.58059e-29	0.421435	RPS14	6.10795e-23	0.97731	PERP	1.28034e-18	0.325156	TNIP31	2.41475e-40	2.93976	FHIT	4.93838e-14	1.19261	TBXAS1	1.98427e-20	0.470385	UTRN	7.99022e-47	1.72518	PDE4A	3.30443e-46	1.28212	RPS27A	6.6928e-46	1.53106	SURF4	3.07085e-18	0.841258	UBE2E2	4.48701e-20	1.33165	GPCPD1	1.03644e-75	1.24341	UBB	1.4033e-35	1.83699	SYTL1	1.28609e-56	0.872711	PXDC1	0.00309031	2.62092	SAFB2	0.000127544	1.0922
8.04918e-16	0.373369	FAM53C	2.04923e-29	0.423879	RPS3A	6.16881e-23	0.480952	CDIP1	1.38912e-18	0.586105	PLA2G16	2.97364e-40	1.0298	RPL7A	6.01006e-14	0.980251	GK	3.43569e-20	0.998797	ZEB2	1.84902e-46	1.37457	HLA-DRB6	7.64775e-46	2.83896	LYN	1.04904e-45	4.56504	TIMP1	5.23163e-18	0.598092	NPM1	5.45728e-20	1.38984	PIM3	3.06323e-75	0.659505	RHBDD2	1.51369e-35	0.817695	LINC01001	1.82764e-56	0.25082	FCGR3A	0.00311574	1.56296	CC2D2A	0.000130367	1.8251
1.27182e-15	0.715423	SIRT1	2.25188e-29	0.381087	HLA-C	8.28617e-23	0.779833	ODF2L	1.74013e-18	0.817013	BCL2L11	1.63503e-39	0.925292	RPS15	6.77303e-14	1.02583	FBLN7	3.6239e-20	0.34347	TPT1	1.95666e-46	1.50658	CORO1B	1.31679e-45	1.61148	YWHAZ	3.07302e-45	2.12558	TXNDC15	5.32277e-18	1.24921	TCTN3	7.01135e-20	1.65264	ATP1B3	2.36202e-74	1.08361	NR4A1	2.03204e-35	0.696861	MPEG1	2.48965e-56	1.03504	CCL2	0.00318718	2.84161	WIPI1	0.00013184	3.43021
1.68484e-15	0.481976	NFKBIA	2.62621e-29	0.948564	ARPC5L	1.32574e-22	0.288956	ITM2C1	2.45801e-18	0.52555	PGAM1	6.07534e-39	0.733808	RPL41	1.05457e-13	1.13593	TP53INP1	4.47593e-20	1.27341	CD226	2.10587e-46	0.999668	HAPLN3	1.46933e-45	1.2373	RPL27A	3.1743e-45	2.90995	GPR15	5.70146e-18	0.7235	ETV3	1.03619e-19	1.0387	ABL2	3.50288e-74	1.00406	DDIT4	3.13996e-35	1.39244	USP3	3.46117e-56	1.45692	FUCA1	0.00322521	3.49525	PPDPF	0.00013838	0.701733
2.13736e-15	0.70392	BCL6	4.9988e-29	1.07558	RAB29	1.50558e-22	1.86378	THBS1	2.58606e-18	0.39061	NOP10	3.54963e-37	1.56886	OXNAD1	1.76084e-13	1.0297	SNHG1	4.75796e-20	1.00041	MGAT5	1.00902e-45	1.73266	CSF1	1.69113e-45	3.83426	DEK	5.4938e-45	5.22721	PYCR1	6.20795e-18	0.960418	FAM60A	1.42018e-19	2.41434	ASTL	1.27866e-73	0.643631	MITF	9.41364e-35	1.39935	SSH2	4.05407e-56	0.737337	SIGLEC1	0.00333898	0.264789	GAB3	0.000141546	0.75031
2.26282e-15	0.365044	CNOT6L	8.20721e-29	0.881039	ATM	1.74299e-22	0.370037	MT-ND4L	3.20625e-18	0.515309	TBCD1	4.04158e-37	0.894355	RPL36A	1.84769e-13	0.92299	IQGAP2	5.61041e-20	0.510653	ATP2B4	1.27852e-45	1.54691	SHE	2.16866e-45	1.36168	RPS20	1.09175e-44	1.6203	TMEM208	6.28781e-18	0.557499	LY86	2.02252e-19	2.02799	RABGEF1	2.87983e-73	0.557152	ALOX5AP	1.01012e-34	1.4693	ARHGAP27	7.61403e-56	0.733937	PLD3	0.00341736	2.62357	NAA50	0.000149113	0.736758
2.47009e-15	0.471331	HERPUD1	1.05667e-28	0.479438	RPL6	3.19689e-22	0.395881	TPT1	3.73289e-18	1.15173	SRGAP31	1.32128e-36	1.45232	TMEM63A	2.07072e-13	1.49894	RANBP2	6.44731e-20	0.814838	PRKX	3.43351e-45	1.47144	SERPINB9	9.1365e-45	2.87007	HVCN1	2.73527e-44	2.79584	HID1	6.40733e-18	0.426475	RPL13A	3.84934e-19	2.08191	ETV3	5.79904e-72	1.37135	RAC2	1.55462e-34	0.851321	2022-03-01	1.0268e-55	1.29335	MRC2	0.00347025	1.45705	SHISA2	0.000152837	0.546514
2.82839e-15	0.559326	IFNGR1	2.13147e-28	0.832801	RAP2B	3.34209e-22	0.967973	SERPINB9	4.0729e-18	0.765431	CDK6	3.2972e-36	1.29229	PCED1B-AS1	4.19823e-13	1.22092	TGIF1	6.39194e-19	0.510981	PPP2R5C	5.03976e-45	4.53243	CTTNBP2NL	1.44439e-44	3.10259	STAT6	4.19376e-44	3.13917	WARS	7.37297e-18	0.959327	PIM2	5.85912e-19	0.714166	ANPEP	8.94165e-72	1.16408	PLPP1	1.70478e-34	1.27057	LUC7L3	1.39422e-55	1.12286	ABCA1	0.00353777	0.925075	ACSM3	0.000157601	1.44482
2.8425e-15	1.14211	RARA	6.61824e-28	0.51277	HLA-DPB1	5.27419e-22	0.864145	ARL4A	4.60539e-18	0.420738	MYL6	3.50734e-36	1.31334	RPL22	5.25394e-13	0.585275	GPRIN3	8.60011e-19	1.67804	C12ORF75	6.06452e-45	1.46839	CD83	2.07445e-44	3.03947	RASGRP2	5.38364e-44	2.25237	IFNAR2	9.9411e-18	0.436493	SEC61B	1.87741e-18	0.985689	LINC00910	2.017e-71	1.38114	ADRB2	3.2419e-34	1.54443	KDM1B	1.67301e-55	1.02884	CD40	0.0036241	1.03494	GAPDH	0.000159598	0.982138
3.4288e-15	0.646517	HNRNPUL1	8.07612e-28	1.19652	ZNF33B	8.54028e-22	0.344429	PTMA	6.13389e-18	0.263419	CALM3	2.18157e-35	1.27157	LINC01138	5.34439e-13	0.872797	ALG13	1.60312e-18	0.634491	EMP3	7.75146e-45	1.80102	SEC14L1	4.41647e-44	4.20451	CYB561A3	7.78572e-44	2.37325	ZBP1	1.26229e-17	0.60575	GDI2	2.30992e-18	1.16794	ADM	4.31187e-71	1.92277	HEG1	6.21472e-34	0.258885	CD300E	2.50386e-55	1.41733	CXCL9	0.00376121	0.965377	PRR5L	0.000169422	1.66467
5.25542e-15	0.706696	SMCHD1	8.5128e-28	0.430866	CST7	1.02992e-21	1.20289	DAPK2	8.71246e-18	0.448165	CTSW1	3.16706e-35	0.771478	RPS19	6.06683e-13	1.01648	FAM177A1	1.94979e-18	0.388953	RBL2	2.00577e-44	1.51368	PIM3	1.94483e-43	6.08101	SCIMP	9.75305e-44	1.4169	ACADVL	1.79654e-17	0.386717	SNRPA	8.02315e-18	1.37468	BTG1	2.13088e-70	1.54241	SIGLEC8	7.69626e-34	0.789066	COTL1	3.63708e-55	0.328591	ARHGAP18	0.00376241	0.725864	SEC14L6	0.000173756	1.8959
5.72812e-15	0.512905	DUSP4	1.05151e-27	1.12839	CYTH4	1.75346e-21	0.85034	LIMS1	9.06925e-18	0.393115	NUSAP11	4.13802e-35	0.59831	RPL37A	6.11396e-13	0.748986	RABGAP1L	3.56462e-18	2.80132	PLEK	2.10115e-44	1.53762	FAM110A	2.35216e-43	5.64951	FAM129C	1.32475e-43	1.62248	TECR	2.2369e-17	0.534629	SLC25A6	1.4917e-17	1.61255	MIR155HG	2.47246e-70	0.954517	RGS1	9.44583e-34	1.56985	TSPAN32	9.89607e-55	0.289523	CD109	0.00376956	3.83696	PPP1R16B	0.00017403	2.06575
6.79199e-15	0.610537	ATP2B1	1.17765e-27	0.674762	KLRD1	4.23816e-21	0.530672	ARHGAP9	1.27105e-17	0.354202	CKAP2	9.92475e-35	1.01858	DGKA	8.99693e-13	1.45098	CD38	4.52832e-18	0.766337	XBP1	2.95609e-44	2.31396	PTP4A3	3.38213e-43	2.13709	WDFY4	1.6905e-43	2.07662	DNAJB11	2.34688e-17	1.07388	UBL7	1.65616e-17	0.826121	FGF23	6.41921e-70	4.35565	FERMT2	1.24672e-33	0.77185	SAMHD1	1.0958e-54	0.577927	IER3	0.00388262	3.59583	BTG2	0.000181516	2.81992
6.97938e-15	0.459789	TRAT1	1.44654e-27	0.99348	RCBTB2	7.76348e-21	1.0303	ARL5B	1.49755e-17	0.397346	ZNF397	1.93985e-34	2.4076	PLEKHB1	1.03195e-12	0.681891	FTH1	5.63859e-18	0.589859	YWHAQ	3.96012e-44	1.12007	FAM53B	6.80554e-43	1.13531	RPS14	1.90658e-43	4.08468	PTCH2	2.66215e-17	0.523817	RPL7	1.96395e-17	1.38493	ZFYVE16	9.88061e-70	1.95232	EDARADD	1.4388e-33	1.325	DOCK8	2.34842e-54	0.284548	ARHGAP10	0.00388854	0.873394	PTPRCAP	0.000184744	1.40674
1.11809e-14	0.83217	YBX3	4.37905e-27	0.720147	APMAP	3.0766e-20	0.476497	ZFP36L21	1.72661e-17	0.44	IVNS1ABP1	2.28163e-34	0.974079	RPS8	1.15784e-12	1.14877	GPR183	1.04966e-17	0.442955	ARHGDIA	4.76567e-44	1.28589	IFI6	8.11439e-43	3.77865	ABLIM1	5.12411e-43	1.47981	SSR2	2.88621e-17	0.258806	PSMB3	2.93564e-17	1.28765	SMG6	7.67608e-69	1.66772	CYP7B1	1.72585e-33	1.4297	FBXL5	1.44574e-53	0.730793	CD63	0.00389874	0.52368	ABCA7	0.000191325	2.13478
1.24779e-14	0.744755	GPR132	6.15187e-27	0.828688	FCMR	4.38496e-20	0.316036	ALOX5AP	1.86574e-17	0.516277	ACOT71	5.04222e-34	1.47075	NSUN5P1	1.17571e-12	0.396105	FBXO34	1.2739e-17	0.428064	SYNE2	9.85309e-44	2.05934	ADAT2	2.37179e-42	5.16599	S1PR1	7.98181e-43	1.85778	CD59	2.89749e-17	0.539926	BTF3	5.07846e-17	1.32989	NINJ1	8.44818e-69	2.19474	A2MP1	1.99093e-33	2.00108	ZNF579	2.12026e-53	1.46213	ARL4C	0.00394397	7.50743	CSF1	0.000195685	1.30837
1.44376e-14	0.470613	IQGAP2	6.7238e-27	0.622957	NLRC5	4.96185e-20	0.538531	NFKBIA1	1.90504e-17	0.60891	RALA	1.30613e-33	1.40061	RBL2	1.38865e-12	0.84707	DNAJB9	1.37132e-17	1.30446	DHRS3	1.34363e-43	1.33942	ACSL4	2.89063e-42	1.05605	PPIA	1.29343e-42	8.6906	IGF1	3.91697e-17	0.473245	RPS12	6.65006e-17	1.37409	ANXA5	2.44151e-68	0.50025	SAMSN1	3.23325e-33	1.53548	P2RY13	3.15607e-53	3.93685	RNASE1	0.0039814	1.72842	DGKD	0.000211223	1.02367
1.8742e-14	0.404173	KDM6B	6.78376e-27	0.416057	IFITM1	5.36866e-20	0.72767	FKBP11	2.25503e-17	0.783519	TRAF5	1.38757e-33	1.17985	RASA3	1.8286e-12	0.873284	TLE3	6.99777e-17	0.724011	RGS19	1.72251e-43	1.06571	ZNF282	4.37222e-42	2.4499	FGD2	2.74547e-42	1.44866	MGAT1	4.14362e-17	0.561626	H2AFZ	1.01598e-16	1.8906	FPR2	3.09365e-68	1.43275	BIRC3	3.78129e-33	0.884796	RXRA	6.09466e-53	0.636071	CD14	0.00399868	2.96641	FAS	0.000220135	1.76334
3.95387e-14	0.605132	ARID5A	1.0425e-26	1.08203	PLEKHF1	6.54169e-20	0.470088	LINC00273	2.26397e-17	1.10139	AKAP51	3.75938e-33	1.98704	NELL2	1.92019e-12	0.779968	STAT3	9.45849e-17	1.08444	TNFAIP3	4.55685e-43	1.36748	KCNN4	6.954e-42	0.452948	SHE	2.79123e-42	0.262717	ARFGAP3	4.32962e-17	1.33634	IRF8	1.04206e-16	2.23556	NAF1	3.49708e-68	0.466694	CTNNBL1	5.69098e-33	0.590449	MALT1	9.87763e-53	0.80038	HSPB1	0.0040236	0.666151	ELOVL6	0.000223061	0.645937
4.75787e-14	0.955755	TMEM39A	1.05483e-26	0.821697	DAXX	1.56669e-19	0.819325	AUTS2	2.69873e-17	0.582079	SLF1	1.45104e-32	2.68976	FAM153A	1.9335e-12	0.68074	MAPRE2	1.40128e-16	1.27108	IFNGR1	8.36261e-43	0.935132	LYST	9.61269e-42	2.00854	FCRLA	3.97643e-42	1.59344	CALR	4.99329e-17	0.39178	RPSA	1.49817e-16	1.53998	CTSL	2.10192e-66	0.825844	CREM	7.32256e-33	0.510386	NBEAL2	1.00623e-52	0.687049	ID3	0.00412323	6.52808	PMAIP1	0.000230412	1.22199
5.94066e-14	0.321254	LEPROTL1	1.6948e-26	0.656402	LPCAT1	1.76293e-19	0.672836	ZFAND5	2.95666e-17	0.524767	SRGAP2	1.49819e-32	1.19186	TMEM123	2.2443e-12	0.271055	UBC	3.39497e-16	1.10683	MRPL10	1.04075e-42	0.75657	TPP1	1.14257e-41	2.31814	SH3BGRL3	9.03283e-42	1.00061	CLPTM1L	5.56443e-17	0.510705	GLIPR1	1.5648e-16	1.2658	MAP3K8	5.82789e-66	1.67584	ANXA1	9.66341e-33	0.595699	TNFAIP2	1.97706e-52	0.675813	HTRA1	0.00417307	1.64207	SH2D2A	0.00024292	0.666279
7.62656e-14	1.32273	KLF31	1.786e-26	0.922258	SORL1	1.93965e-19	0.377638	MIR663AHG	4.08507e-17	0.420653	TPI11	2.93811e-32	1.2354	TC2N	2.52556e-12	0.717365	C9ORF72	4.79408e-16	0.41247	ITM2B	1.4328e-42	1.19627	PKM	1.58794e-41	2.72828	SLC44A2	2.21077e-41	2.46789	TRAM2	6.63328e-17	0.916297	SNRNP25	1.67379e-16	1.73915	DOT1L	7.75402e-66	0.616985	MAPRE3	1.17686e-32	1.1043	SECTM1	1.17455e-51	0.655429	HLA-DMA	0.00438225	2.90227	DNAJB1	0.000254433	0.802654
9.13452e-14	0.626202	LYST	2.26914e-26	0.706101	GIMAP5	3.43823e-19	0.80478	PDE4D	4.98855e-17	0.316229	HLA-DPB11	2.15553e-31	1.19159	CAMK4	3.57143e-12	0.488776	ZFP36L2	6.50971e-16	1.60546	CD200R1	2.77779e-42	2.0867	ACOT9	2.75237e-41	3.10713	PRKCB	2.24002e-41	0.857015	GALNT2	6.64505e-17	0.659958	CORO1A	2.06057e-16	3.8901	TNIP3	1.02711e-65	1.7938	TMEM233	2.72206e-32	1.29476	KLF13	1.74811e-51	1.0921	PRDX1	0.00455939	2.04234	RNF149	0.000269509	1.22272
9.38938e-14	0.549222	NFKB1	8.64087e-26	0.643594	RCSD1	3.53553e-19	0.341759	MT-CYB	5.04856e-17	0.3277	PGK11	3.7165e-31	0.638615	RPL35A	4.61879e-12	1.16407	CHD1	6.93234e-16	2.59601	HIST2H2AA4	7.40958e-42	1.94722	FRMD4B	2.78814e-41	4.60519	TLR10	2.95137e-41	1.46498	SSR1	6.92519e-17	2.13829	NET1	2.3747e-16	1.93392	SLC30A4	1.72286e-65	0.728837	CD63	3.60269e-32	1.44631	CASP1	2.9875e-51	0.710514	CD72	0.00462326	1.92616	PDE4D	0.000269753	2.58865
9.60925e-14	0.668805	IER2	2.06167e-25	1.1034	GIMAP6	7.34335e-19	0.958152	RAB11FIP1	5.59326e-17	0.723311	PTMS	3.8241e-31	2.07658	SVIL	4.8925e-12	0.603085	PDCD4	7.36695e-16	1.63836	VCL	2.97093e-41	0.973707	PARK7	3.44946e-41	1.41441	RPS10	3.54172e-41	0.985389	CISD2	6.93895e-17	0.850569	CD101	2.94517e-16	1.47802	PHLDA1	2.08039e-65	0.432365	BHLHE40	4.2887e-32	1.85204	VNN2	6.82861e-51	0.404503	CD9	0.00467441	0.641658	TPTEP1	0.000272672	3.13585
1.12606e-13	0.543703	EIF4A3	2.38035e-25	1.23108	SH2D3C	7.96738e-19	0.430125	DOCK10	9.19038e-17	1.21344	ADGRG51	5.77288e-31	2.09736	DPEP2	5.83965e-12	0.818169	ELMO1	9.45364e-16	1.20976	GZMK	3.79291e-41	1.36802	CD7	1.17614e-40	2.71131	CLEC2D	1.33223e-40	2.01163	SPATS2	7.52744e-17	0.582355	RPL3	3.66727e-16	1.22923	PNP	2.74997e-65	1.07767	FOXP1	6.32088e-32	1.58764	GIMAP8	2.0435e-50	0.4151	RNASE6	0.00473943	0.887865	ADGRE2	0.000282503	1.12951
1.77433e-13	0.299807	SDCBP	2.99445e-25	0.459434	S100A6	1.35075e-18	0.683671	IRF4	1.40714e-16	0.310917	EPSTI1	7.49785e-31	0.931226	NPM1	6.1031e-12	0.262701	HNRNPA1L2	9.75071e-16	0.493911	MACF1	4.38909e-41	0.785183	LSP1	6.70987e-40	2.7485	GPSM3	1.49895e-40	0.66975	CECR1	7.54943e-17	1.05814	MEF2C	3.95834e-16	1.09362	ATP2B1	2.95898e-65	1.13286	RAB37	1.35974e-31	1.18603	AGTPBP1	2.8846e-50	0.794263	CTSH	0.00480059	5.27003	TMEM263	0.000283275	0.984938
2.46417e-13	0.440491	RUNX3	3.02545e-25	0.60406	KLRC4-KLRK1	1.746e-18	0.451758	FAM46C1	1.43045e-16	0.293478	AKIRIN2	8.61935e-31	1.46459	TMC8	1.17135e-11	0.567102	CCR4	1.05753e-15	0.32007	LINC00869	5.01599e-41	1.05027	TFRC	9.96786e-40	4.1309	BACH2	1.50126e-40	2.37367	GMPPB	7.93638e-17	0.441777	RPS3	3.97146e-16	1.8259	NOTO	3.30118e-65	1.24011	ALDH1A1	1.43018e-31	0.394284	TMSB10	6.05154e-50	0.909034	RGS1	0.00482373	4.4573	TSPYL2	0.000283999	1.48955
3.53838e-13	0.574239	RHOH	3.2509e-25	0.850257	LYAR	1.78381e-18	1.07516	ISYNA1	1.54722e-16	0.369545	PARK7	1.1193e-30	1.01271	BACH2	1.36044e-11	2.34912	LGMN	1.13369e-15	4.02453	GZMH	6.23359e-41	1.11625	SNX9	1.78638e-39	1.08617	RPS18	7.29627e-40	1.99518	TMED9	8.49262e-17	1.33477	GPAT3	6.0692e-16	1.22712	SPAG9	3.87226e-65	1.45029	ATP6V0A2	2.43612e-31	0.976747	FGD2	9.64983e-50	0.51906	HEXA	0.00490705	1.35978	FLNA	0.000295229	1.87478
5.42024e-13	0.676469	CHMP1B	4.02761e-25	1.13845	ARHGAP1	3.58564e-18	1.37501	MMD	1.64375e-16	0.801131	RAB3GAP11	1.13121e-30	1.23244	PIK3IP1	1.49499e-11	0.836134	ARID4B	1.20774e-15	0.711455	FKBP2	6.41513e-41	1.09225	JAKMIP1	1.94298e-39	2.62601	CD79B	1.13563e-39	2.10547	SEC24D	8.91534e-17	0.475259	ARPC2	6.72492e-16	1.32944	BRE	1.09777e-63	0.580289	BMP2K	3.2972e-31	1.44045	SMARCD3	1.63615e-49	0.273862	NECTIN2	0.00494019	1.21528	ZC3H6	0.000300586	0.815498
5.69922e-13	0.451898	CCNL1	6.84357e-25	0.593717	PCED1B-AS1	4.19314e-18	0.698389	PVT1	1.7976e-16	0.609462	DNPH11	1.91845e-30	0.832717	RPL27	1.53379e-11	0.895707	NAP1L4	1.23466e-15	0.409555	PPIB	8.00922e-41	1.44871	MAST4	1.94949e-39	2.67597	PDE7A	1.31061e-39	1.24122	ICAM2	9.21366e-17	0.395073	HMGN1	6.78143e-16	1.2597	C5AR1	1.15072e-62	1.41989	GLUL	4.90415e-31	1.08436	CCR2	1.89361e-49	0.625852	LINC00998	0.00499178	0.873944	APOBEC3C	0.000310228	1.86497
6.0831e-13	0.58374	GABRE	7.05989e-25	0.346484	IL32	4.75568e-18	0.813067	KLRC3	1.84009e-16	0.614287	BST2	2.14472e-30	1.47644	IDO2	1.63291e-11	0.382594	CYTIP	1.25951e-15	0.575276	CD48	3.74769e-40	1.71507	ZC2HC1A	2.82119e-39	1.88949	EML4	1.7644e-39	1.92946	GSTM2	1.20543e-16	0.481218	2022-09-06	1.00347e-15	1.3955	ARL5B	1.27552e-62	0.753491	PRPF40B	9.97482e-31	1.45406	DPEP2	2.89777e-49	0.859772	SORBS3	0.00510779	3.83436	NR4A2	0.000310752	0.544174
9.48552e-13	1.05218	ANK3	8.97887e-25	0.368214	RPS27	6.44407e-18	0.371352	SH2D2A	3.16819e-16	0.337698	PCED1B1	1.55365e-29	1.83087	CLUAP1	1.87548e-11	0.798751	IDI1	1.61162e-15	0.571669	RNF125	3.82676e-40	1.08268	RPS27L	3.50286e-39	2.54943	BCAS4	2.04888e-39	1.22845	NPC2	1.39221e-16	0.6511	RPL5	1.25529e-15	0.977173	RASGEF1B	1.78858e-62	0.971814	TMOD1	1.14094e-30	0.517929	NDEL1	3.04908e-49	0.402532	VKORC1	0.00512242	4.41692	NR4A1	0.000312607	1.77119
9.90411e-13	0.687527	ETV3	1.03093e-24	0.550081	PPP1CA	7.71361e-18	0.392936	CDKN1A1	3.31016e-16	0.250675	CXCR41	1.75391e-29	1.3413	PRMT2	2.33507e-11	0.637785	CCNH	1.85658e-15	0.431003	P2RY8	4.31989e-40	1.16175	BTG3	4.51146e-39	2.67526	STK17A	2.2713e-39	1.43143	ARSA	1.46267e-16	1.60761	RAB30	1.33075e-15	0.983759	NR4A2	2.40176e-62	0.87931	SRGN	1.78022e-30	0.332212	SYTL3	4.27676e-49	0.933412	DBNDD2	0.00532124	0.296435	E2F3	0.000320454	1.89907
1.21994e-12	0.773929	EGR1	1.47691e-24	0.786668	HEATR5B	8.40402e-18	1.9362	CCR6	3.54059e-16	0.404288	SMC4	1.8581e-29	0.791606	RPS16	2.75888e-11	0.831301	HMGB2	2.12947e-15	1.5593	PELO	5.99324e-40	1.0664	EPSTI1	5.40967e-39	2.57621	ARAP2	2.43516e-39	4.44113	AQP3	3.60389e-16	0.726749	HIST1H2BK	1.57136e-15	1.22765	PRDM1	1.07695e-61	2.58712	PAQR5	4.3084e-30	1.06199	LILRB3	4.48021e-49	0.862379	MIR155HG	0.00538034	0.97731	TBL2	0.000322979	1.79882
1.58172e-12	0.350928	PPP2R5C1	2.3871e-24	1.49237	KLRA1P	9.52582e-18	0.717242	SIK11	4.2825e-16	0.347854	CD2	4.02816e-29	0.849597	EEF1D	3.11631e-11	0.633349	LIMS1	3.53593e-15	0.550429	PIM1	1.4792e-39	1.07665	GPX1	7.32011e-39	1.08985	RPL18A	2.94959e-39	1.61933	UBC	5.00303e-16	0.719087	SLC2A1	1.5894e-15	1.21072	RAPGEF1	1.70867e-61	0.685351	CACNA2D1	4.40808e-30	0.902676	ZNF302	6.13857e-49	0.379887	HEXB	0.0053942	1.90864	LYZ	0.000341792	0.951841
1.62497e-12	0.316623	RASGEF1B	2.86835e-24	0.605664	CAPN2	1.01563e-17	0.833489	MPZL31	4.33595e-16	0.739626	CCDC141	8.5444e-29	0.950297	CDC25B	3.40982e-11	1.07366	SEC14L2	5.11944e-15	0.536129	P4HB	5.26654e-39	1.85121	OAS1	8.59618e-39	3.21037	SMIM14	4.16568e-39	2.80135	H1FX	5.07632e-16	0.7831	TSPAN33	1.9774e-15	1.61884	YBX3	2.30132e-61	0.783148	SQSTM1	4.59878e-30	0.320204	RELB	8.62757e-49	0.795892	SDSL	0.00544558	3.8531	GPR141	0.000363186	1.14698
1.77263e-12	0.571303	GTF2B	3.17397e-24	0.807163	PTGER2	1.2017e-17	0.791524	RGL4	4.72858e-16	0.663825	CBLB1	1.08764e-28	2.59387	NUAK2	3.53398e-11	1.12086	KPNA2	7.25316e-15	0.450794	LRRFIP1	1.14651e-38	0.912809	CASP1	8.98859e-39	2.84222	INPP5D	6.06591e-39	0.654265	LRRC59	6.34269e-16	0.548026	RPL23A	2.6408e-15	0.859748	SPAG16	8.07188e-61	0.583456	ARHGAP18	7.52248e-30	1.57875	OAS1	3.2479e-48	0.610643	TNFSF12	0.00550019	6.58628	SBF1	0.00037128	0.837724
1.79771e-12	0.487959	ERO1B	3.26428e-24	0.724038	ITGB1	1.9483e-17	0.31964	GTF3C4	6.06844e-16	0.469447	PELO1	1.51175e-28	0.76859	UBA52	3.5361e-11	1.3939	SIAH2	7.56174e-15	0.541851	RAP1B	1.18041e-38	4.13945	LMCD1	1.40133e-38	1.43259	RPS12	1.03446e-38	1.60439	HIST1H2BK	7.45511e-16	0.407028	TOMM6	5.15159e-15	1.32792	ZNF267	5.48983e-59	0.883941	PRNP	7.68309e-30	1.13519	SH3BP2	4.6972e-48	0.545611	SGK1	0.0060522	0.730513	HUWE1	0.000396769	1.84647
1.79874e-12	0.386326	OAT	5.44203e-24	0.827345	S1PR4	2.80034e-17	0.662411	NPIPB3	6.67044e-16	2.03503	TIAM1	1.95937e-28	3.12222	VNN2	3.87582e-11	0.816138	AIM1	1.26516e-14	0.74526	GSTP1	7.50088e-38	1.3391	UTS2	1.41957e-38	5.409	PIK3CD	1.06627e-38	0.815622	SRPRA	7.58239e-16	0.834084	GRASP	6.22891e-15	0.967597	ITGA5	5.72799e-59	0.493922	PTPN7	8.82088e-30	1.06566	KIAA1551	4.92029e-48	0.346492	CLEC5A	0.00623874	2.0921	PRDX6	0.000400977	3.0405
2.09846e-12	1.51545	CXCR5	7.69109e-24	0.790901	BTN3A1	4.16518e-17	0.891956	SOCS1	8.13014e-16	0.484875	TMEM70	2.92446e-28	0.700153	SRSF5	4.08702e-11	1.08397	METTL8	1.67606e-14	1.47939	CCL4	8.22428e-38	3.06377	CD70	1.67721e-38	3.47329	SYPL1	1.71407e-38	1.68035	SEC61G	7.67918e-16	1.02731	MIR181A1HG	6.50299e-15	1.17479	CREM	1.29768e-57	0.623748	NMT2	8.82598e-30	0.426065	DEGS1	4.98574e-48	0.764554	TSPAN4	0.00626008	4.65644	AP3M1	0.000401632	1.68322
2.10095e-12	0.358025	ATF4	8.07142e-24	1.27912	TYROBP	4.54489e-17	1.39421	PLPP1	9.06068e-16	0.732833	OAS3	3.52458e-28	0.747233	RPS24	5.91063e-11	0.941922	H2AFZ	2.10468e-14	1.04083	ABI3	8.5216e-38	1.83574	MAGEH1	1.78677e-38	2.26399	ARHGAP15	2.7293e-38	0.660211	CANX	7.79395e-16	0.289983	LAP3	7.75301e-15	2.18805	SDC4	1.60978e-57	0.731578	RHOH	1.37313e-29	1.21136	SULT1A1	5.01634e-48	1.7252	DFNA5	0.00634161	0.436371	PINK1	0.000417118	1.10855
2.41447e-12	0.430149	STAT4	1.92609e-23	0.743456	CRBN	4.59026e-17	0.622907	ARHGEF7	1.05561e-15	0.264415	PSME2	6.03213e-28	0.763953	RPL26	7.20944e-11	0.606798	RGPD6	2.21794e-14	0.34027	CCND3	1.09104e-37	1.04196	CTNNB1	3.10193e-38	2.42225	TRIM38	4.16267e-38	2.08373	IDH2	8.77789e-16	0.472803	SNRPD2	9.35597e-15	0.359337	2022-03-01	2.17755e-57	0.832418	IDS	1.62343e-29	1.52292	NCF1C	5.23124e-48	1.18555	GATM	0.00637443	3.41202	NAMPT	0.000459403	0.8422
3.10145e-12	0.583392	KDM2A	2.20433e-23	0.310506	EEF1A1	5.18599e-17	0.506894	TUBA1A1	1.10446e-15	1.62192	TNS3	1.59088e-27	1.88315	ADTRP	8.1423e-11	0.675912	TIPARP	2.29807e-14	2.12712	F2R	1.16133e-37	4.29128	CADM1	3.57709e-38	1.88425	STX7	5.3203e-38	0.852202	CTSD	9.12573e-16	0.768102	CCDC50	1.21489e-14	0.812126	GYPA	3.29808e-57	1.0756	SYCP2L	2.10915e-29	0.369132	SMYD3	8.59875e-48	0.710769	TNS3	0.00643194	9.58473	RGS16	0.00049981	0.952272
3.23843e-12	0.341944	ELF1	2.43515e-23	0.761473	SLAMF6	6.97292e-17	1.39401	TXK	1.10687e-15	0.543194	PDCL31	1.61492e-27	2.53321	RNF144A	8.28578e-11	1.26467	CDK16	2.88164e-14	0.273828	RNF149	1.22934e-37	1.51783	INPP1	4.88466e-38	2.47817	PRR13	5.75646e-38	1.90066	HIST1H4I	9.92537e-16	0.380876	HIST1H4C	1.51662e-14	0.950469	GADD45B	3.56143e-57	0.740714	SERTAD1	2.30604e-29	1.32523	TRAF3IP3	8.79746e-48	1.00228	LILRB4	0.00654864	1.69253	AGTRAP	0.000506839	1.43409
3.63739e-12	0.697738	SLFN11	2.89881e-23	0.92719	RGS19	7.1786e-17	0.2856	EIF11	1.1342e-15	0.364731	PRDX51	2.27791e-27	0.879284	FCMR	8.59401e-11	1.0287	CCR7	3.41661e-14	2.07599	GAB3	1.83337e-37	1.7092	APLP2	7.01946e-38	1.1441	SSH2	8.2238e-38	5.05851	HIST1H2BD	1.00977e-15	0.677072	SLC25A5	1.57594e-14	1.51765	DCUN1D3	4.02921e-57	0.52196	TNFAIP3	3.49504e-29	0.569049	HLA-B	1.36499e-47	0.86604	BLNK	0.0067946	1.36737	GBP2	0.000514629	1.03294
4.71628e-12	0.576252	AKNA	3.95756e-23	0.507715	GMFG	7.18512e-17	1.40628	XCL2	1.19636e-15	1.84912	VDR	2.6711e-27	0.975229	EIF3E	9.71737e-11	0.621324	SESN1	4.32782e-14	0.776022	KCNA3	3.20912e-37	1.06173	ICOS	9.63087e-38	1.01815	RPL15	8.89988e-38	1.65028	SLC1A5	1.15591e-15	0.451248	BRK1	1.71581e-14	1.50211	RALGDS	2.11217e-56	1.09824	NSMCE1	4.57419e-29	1.27908	ICAM3	2.00766e-47	0.624234	MARCKS	0.00683822	9.81457	KIR2DL3	0.000541073	1.28492
4.72568e-12	0.65808	MARCKSL1	4.35736e-23	1.58114	LGR6	8.62931e-17	0.420685	SMG1P3	1.28178e-15	0.48533	SP140	4.30976e-27	2.67617	C1ORF228	1.01105e-10	1.71615	GPR18	5.03868e-14	0.458149	TAGAP	6.74165e-37	1.08585	TRAF1	1.08954e-37	3.57789	SLC2A3	2.04246e-37	1.43966	COPE	1.17596e-15	0.752907	TUBA1B	2.09005e-14	2.17225	OXSR1	2.74301e-56	0.885558	MYADM	4.93494e-29	0.996606	HSD17B12	2.13606e-47	0.402663	ADPRH	0.00695789	10.0459	IL6ST	0.000544819	0.447747
6.99826e-12	0.690058	TAGAP	4.87695e-23	0.589752	IL10RA	9.78171e-17	1.52685	ABHD15	1.56014e-15	0.34166	ITM2C2	5.68151e-27	1.25338	LRRC75A-AS1	1.52436e-10	1.29288	GEM	5.06971e-14	0.749155	MPZL3	8.3403e-37	0.926605	FAS	1.25655e-37	1.18828	RPS2	2.43634e-37	1.88643	ST6GALNAC4	1.20757e-15	1.70117	AFF3	2.22582e-14	0.751972	REEP2	2.93185e-56	0.463362	CAPG	6.00078e-29	2.11871	MXD3	2.99746e-47	0.778154	CXCL16	0.0070666	2.45821	PLA2G16	0.00057195	2.47924
8.11009e-12	0.456754	CD55	5.76711e-23	0.324758	RPS6	2.43469e-16	0.325037	STK17B	1.60472e-15	0.838105	TOX	5.96143e-27	1.79153	GIMAP1-GIMAP5	1.55319e-10	0.760039	SESN3	5.98239e-14	0.397129	PSME1	9.44763e-37	2.79841	SERPINE2	1.39507e-37	2.83744	PIK3AP1	3.44618e-37	2.6697	ENAM	1.30689e-15	0.411631	MRPL18	2.64077e-14	1.14208	KYNU	4.67158e-56	0.383023	ELOVL7	6.06711e-29	0.785443	AGO4	4.38004e-47	1.22619	GPR84	0.00711839	1.18442	BSG	0.000593721	2.88199
9.39975e-12	0.796805	CDKN1A	1.01152e-22	0.671729	PRR5L	2.92397e-16	0.90493	IRF8	1.94342e-15	0.324893	PDE4D1	7.23473e-27	1.25198	GLTSCR2	2.2523e-10	0.549439	SLA	6.09964e-14	0.729676	GRAP2	1.04161e-36	0.947716	NCOA3	1.42472e-37	1.14881	RPL23	8.05977e-37	1.56846	FCRL5	1.36729e-15	0.455572	PSME2	4.15e-14	0.666683	TREML2	2.0331e-55	0.467355	SPTBN1	8.9774e-29	0.782364	CORO1A	4.93956e-47	0.637272	MFSD1	0.00717058	2.41297	CXCR4	0.000598844	0.312414
9.73894e-12	1.06246	KLF21	1.49292e-22	0.604005	BTN3A2	3.05957e-16	0.534577	CAMK4	2.04876e-15	0.520908	TSPO1	9.02789e-27	1.03866	PNISR	2.58267e-10	0.746993	CHMP1B	1.01847e-13	1.73806	IL23R	1.88885e-36	1.24391	ZC3H7A	1.77262e-37	2.63605	NIN	1.17387e-36	1.1623	SRGN	1.36978e-15	1.20254	CPVL	4.59523e-14	0.907923	PPP1R15A	7.18709e-55	1.09511	BTG2	2.95848e-28	0.888175	IFITM2	8.70584e-47	0.5594	ADAM28	0.00742517	0.296374	QKI	0.000619225	1.31941
9.74318e-12	0.64118	FAM160B1	3.68652e-22	0.658664	CASP1	4.39102e-16	0.545177	SDCBP1	2.3947e-15	0.636271	SYNGR2	1.02031e-26	0.629143	HNRNPA1	3.49328e-10	0.645174	LEPROTL1	1.026e-13	1.12326	SH3BP5	3.17572e-36	0.84067	GALM	2.64468e-37	2.45945	ADAM28	1.86148e-36	2.30156	HIST1H2BC	1.41854e-15	0.586852	GPRIN3	5.25865e-14	1.66295	DENND5A	4.14222e-54	1.04661	VIM	3.69489e-28	1.49548	WASF2	8.962e-47	1.26166	TCEAL9	0.00743216	0.641813	NKG7	0.000641183	0.644399
9.77815e-12	0.265499	TIPARP	7.21352e-22	0.425527	RPS29	8.80551e-16	0.285399	CCL5	2.88135e-15	0.430007	DYNLL1	1.65137e-26	1.03649	CCND3	3.78629e-10	1.13796	DDIT3	1.15408e-13	0.364523	FLT3LG	3.24665e-36	1.25494	TRIB1	9.18244e-37	2.7694	DCK	2.24282e-36	2.35696	SLC35B1	1.54687e-15	1.40223	SLAMF7	5.4052e-14	1.75759	APLP1	8.70916e-54	0.950625	ST3GAL3	4.81419e-28	0.457216	SMIM3	9.98419e-47	0.258253	SMPDL3A	0.0075062	1.95004	IDS	0.000643119	0.825891
1.00697e-11	0.522813	GADD45B	1.09282e-21	0.360467	RPL13A	9.90629e-16	0.596306	SIRPG	2.88552e-15	0.403154	CAPG1	2.22331e-26	1.14564	LINC00959	4.27724e-10	0.521198	CKS2	1.18422e-13	0.854681	ADAM8	3.38246e-36	2.33752	SOX4	1.53909e-36	3.26923	RILPL2	2.54262e-36	1.23314	FBXW7	2.1459e-15	0.388267	RPL4	8.22191e-14	1.44043	BCL6	1.30579e-53	0.491692	SMIM3	5.6412e-28	1.04749	GMFG	1.07361e-46	1.45585	C2	0.00755594	3.10525	MTSS1	0.000644047	1.01299
1.16643e-11	0.532048	ZNF10	1.12448e-21	0.939195	NPRL2	1.05506e-15	0.477178	PLXDC1	3.45239e-15	0.436527	ATP5J2	2.70356e-26	3.42498	TSHZ2	4.65457e-10	0.5846	EVI2A	1.39127e-13	1.38499	SAMD3	4.58804e-36	0.911362	APOBEC3C	1.6578e-36	1.70448	PRDM2	3.35161e-36	1.7039	RGCC	2.34443e-15	0.581379	RPS7	8.77194e-14	0.893198	BTBD19	6.29862e-53	1.18378	SKAP1	6.33272e-28	0.773419	NBPF14	1.1616e-46	0.644964	CISD2	0.00786387	3.80288	PLCXD2	0.000681509	1.12431
1.24786e-11	0.63894	FTH1	1.371e-21	0.718186	TBX21	1.75734e-15	1.52396	AREG	3.49864e-15	0.283044	ADORA2A	3.0267e-26	1.4402	TTC3	4.82635e-10	0.455589	HSPA5	1.45923e-13	0.715753	SLF1	7.73359e-36	2.129	HPGD	2.79982e-36	2.06167	CYBB	3.53509e-36	4.05878	GAS6	2.71349e-15	0.695625	DUSP4	1.11186e-13	1.13876	NFAT5	6.78308e-53	0.82023	H3F3B	6.9505e-28	0.910531	PLPPR2	2.63765e-46	1.42621	BHLHE41	0.00795484	1.53741	PSMA5	0.000687407	1.81857
1.32563e-11	0.38135	SLC38A1	1.83203e-21	0.46799	PSMB9	2.16816e-15	0.368682	FYN1	4.30836e-15	0.368941	DUSP161	7.31866e-26	0.991755	CEPT1	5.15654e-10	0.638131	SOWAHC	1.53221e-13	3.21489	FCRL6	8.53652e-36	1.84114	TRIM16	2.88187e-36	2.32189	ITSN2	3.85335e-36	1.69898	NME1	3.33031e-15	0.572826	UCHL3	1.2873e-13	1.0309	REL	8.93125e-53	1.07765	ALS2	9.33537e-28	1.49187	TMEM170B	5.3507e-46	0.783646	EGR2	0.00815387	1.44059	BRD2	0.000691438	0.592412
1.42163e-11	0.733993	CD6	1.84233e-21	2.24353	PTCH1	3.95036e-15	0.60903	LAIR11	4.32071e-15	0.396793	IFI6	9.12074e-26	0.784907	RPS28	7.01389e-10	0.387656	CD2	1.68637e-13	1.35018	GLUL	1.08043e-35	1.13582	CACYBP	3.16823e-36	5.82526	CNR2	4.33631e-36	1.85012	COPG1	3.36383e-15	0.396367	CHCHD2	1.42583e-13	1.0516	TNFAIP2	1.11465e-52	0.628473	PLIN2	9.48234e-28	0.420925	FGF23	5.38639e-46	0.726553	CAPG	0.00823254	0.491171	FAM98C	0.000706012	0.676103
1.5779e-11	0.491511	KMT5C	1.9704e-21	0.461564	GPSM3	4.45135e-15	0.745476	VPS37B1	6.75934e-15	0.986116	CLECL1	2.09463e-25	0.995907	SATB1	7.12066e-10	0.771359	NPIPB5	2.2534e-13	0.275453	CFL1	2.90606e-35	1.42457	TMEM154	5.7013e-36	1.36917	RPL10A	5.97718e-36	2.1883	PARM1	3.46727e-15	0.490228	PSMB9	1.49419e-13	1.03533	JUND	4.90264e-52	0.694334	NR4A2	1.01053e-27	0.611853	RPL37	1.4776e-45	0.552873	CREBL2	0.00848493	0.720333	SCAMP4	0.000717918	2.96857
1.63535e-11	0.725151	NEK7	2.88826e-21	0.406257	APOL2	5.47551e-15	0.292974	PHLDA1	8.15187e-15	0.885358	ARL3	2.43514e-25	0.562685	TPT1	7.20032e-10	0.637572	COTL1	2.57654e-13	0.541892	TIMP1	2.92434e-35	2.16975	LTA	5.8043e-36	4.21614	ATP8B1	9.02935e-36	1.70677	CSF2RB	4.27692e-15	1.76728	LTB	1.87436e-13	1.35877	VDR	5.59952e-52	0.753653	PPP1R15A	1.4739e-27	1.3442	FGD3	2.60063e-45	0.731536	GPR137B	0.00851632	0.766925	PDP2	0.000750935	0.387661
1.75683e-11	0.508282	ZC3HAV1	3.18318e-21	0.657121	MYO1G	6.52904e-15	0.796438	SNHG161	8.3661e-15	0.290357	IFI16	2.86743e-25	1.16688	C6ORF48	7.71498e-10	0.430607	BTG1	2.91719e-13	0.733095	MBNL2	9.10254e-35	0.894824	TTN	6.56819e-36	3.73429	PARVG	9.5006e-36	2.85692	SLC44A1	6.41926e-15	0.646162	OTUD1	2.942e-13	1.66164	FAM129B	1.3984e-50	0.703189	FAM46A	2.13595e-27	1.48759	OSCAR	8.19884e-45	0.77242	ATP6V1F	0.00853049	1.81828	HN1	0.000761394	1.12469
2.69092e-11	0.559788	NXF1	5.14011e-21	0.6498	SIGIRR	8.16538e-15	0.311124	MT-CO2	8.97491e-15	0.832526	CD91	3.56002e-25	1.72533	GIMAP8	7.72985e-10	1.21409	HSPE1	3.02082e-13	0.527728	MAP3K4	1.04417e-34	0.868281	ZC3H12D	7.32237e-36	2.24525	SNX10	1.13616e-35	4.24788	C4B	7.4182e-15	0.743826	SSR1	4.05482e-13	0.519662	FTH1	3.11913e-50	1.08324	PTGS2	2.55483e-27	0.79927	HCK	9.36426e-45	0.855886	GGTA1P	0.00863986	0.467233	TENM4	0.000770207	0.827947
3.08722e-11	0.35777	DDX3X	6.48323e-21	0.347031	ADGRG5	9.16101e-15	0.28046	SARAF1	1.19397e-14	0.324012	HNRNPLL1	4.65639e-25	0.889749	SCML4	8.48613e-10	0.269164	SRSF7	3.80474e-13	0.37703	ABRACL	1.2826e-34	2.18356	RBBP8	2.66733e-35	3.57102	SPOCK2	1.62953e-35	2.31937	RAB30	8.64622e-15	0.421479	RPS15A	6.70215e-13	0.531354	SRGN	2.8532e-49	0.842517	SARAF	2.73466e-27	1.05166	TCF7L2	2.39733e-44	0.269119	TGFBI	0.00888337	2.7147	CD6	0.000777437	0.59622
4.81967e-11	0.50078	JUND	6.84862e-21	0.6522	NDUFB7	9.1667e-15	1.49867	P2RY11	1.34855e-14	0.43809	GSTO1	4.69979e-25	1.59181	NSUN5P2	9.69685e-10	0.313493	PPP1R16B	3.87395e-13	0.949384	TIPARP	2.08182e-34	1.33075	CXCR3	2.95623e-35	2.8444	ATAD2B	1.69604e-35	1.63989	SEC13	9.003e-15	0.715394	YDJC	7.32029e-13	1.59112	ACSL5	3.54723e-49	1.12836	TANC1	2.85049e-27	0.875638	PCSK5	3.03089e-44	0.832722	PAPSS2	0.00900006	4.10034	PTGER4	0.000827547	0.721124
6.26457e-11	0.631502	ATXN7	7.05807e-21	0.663108	DENND2D	9.31064e-15	0.678149	JMY	2.29396e-14	0.440493	SEL1L3	4.79154e-25	1.42056	STMN3	9.8166e-10	0.779396	PTP4A1	5.27125e-13	0.421424	TAPBP	2.13468e-34	2.28249	ETV7	3.58726e-35	0.714097	MT-CO1	1.86487e-35	1.29825	REEP5	9.55421e-15	1.00907	GOLGA8A	8.10159e-13	1.31878	BHLHE40	6.71788e-49	1.28279	PKIG	4.14992e-27	0.322379	PRDX6	9.65512e-44	0.402587	TTYH3	0.00908853	2.44573	YPEL5	0.000849308	1.41205
6.68901e-11	1.04013	UAP1	8.26566e-21	0.788701	CALHM2	1.33262e-14	0.314318	MT-ATP8	2.58381e-14	0.316397	GNG5	4.92667e-25	2.20009	EPHX2	9.95697e-10	0.70794	ITPKB	6.05795e-13	0.48294	REEP5	5.79112e-34	1.70161	CREB3L2	4.719e-35	4.38731	KYNU	4.59222e-35	4.75238	C4A	1.04269e-14	0.373548	HMGN3	8.61328e-13	2.55653	CDC42EP2	2.70281e-48	0.785246	EGR1	7.3989e-27	1.82264	BIN2	1.62196e-43	0.488512	CCND1	0.00912996	8.30715	LILRB1	0.000867749	0.849142
7.03298e-11	0.51523	ZC3H12A	1.10715e-20	0.357077	RPL34	1.7058e-14	0.396124	PGK1	2.90728e-14	0.490838	S100A11	7.80566e-25	0.928084	EIF3L	1.05178e-09	0.665631	GPCPD1	6.66863e-13	1.23983	ADA	6.03399e-34	0.972364	PTPRJ	5.05189e-35	2.74335	FOXP1	6.82727e-35	2.9053	MIR4435-2HG	1.15999e-14	0.437872	RBM3	1.00744e-12	1.0593	OSBPL6	3.2493e-48	1.25141	ARHGAP6	7.80334e-27	0.586482	GNA12	1.85599e-43	0.689215	SLC29A3	0.00917983	1.53984	C12ORF75	0.00091147	1.14584
7.14867e-11	0.39833	MAP3K2	1.35915e-20	0.635112	SPN	2.06269e-14	0.8588	APOBR	3.04495e-14	0.356286	PLSCR1	8.47708e-25	0.952489	SERINC5	1.1631e-09	0.612232	DNAJB6	9.52561e-13	0.895654	ITGA5	7.19032e-34	2.8632	HLA-DQA1	5.84746e-35	3.99364	TUBA1A	9.91381e-35	2.76316	TNFRSF18	1.20473e-14	0.588892	ACTB	1.05136e-12	1.71204	VPS37B	9.50505e-48	1.55369	TAL1	8.69665e-27	1.03697	ST14	2.22651e-43	0.845828	HLA-DMB	0.00918185	8.61796	GPR171	0.000931415	0.521738
8.12796e-11	0.318156	NAMPT	1.4417e-20	0.631006	RBL2	3.67412e-14	0.279477	MT-ND2	3.0793e-14	0.45948	CTSC1	1.38024e-24	1.23942	STAG3L3	1.26878e-09	1.3072	BTLA	9.73371e-13	0.817296	DSTN	7.78811e-34	1.22507	MAP2K3	8.26934e-35	1.94773	ATP2B1	1.58875e-34	3.47137	MAN1A1	1.25067e-14	0.937886	GNL3	1.54216e-12	1.9609	INHBA	1.97458e-47	0.370238	LAT2	9.17578e-27	0.937511	CHST15	3.55419e-43	0.685473	CTSZ	0.00941158	8.16124	RAP1GAP2	0.000945765	0.64738
1.09478e-10	0.313069	CCL4	1.62402e-20	1.03786	ING4	4.003e-14	0.284351	MT-ND3	4.39638e-14	0.369828	SLA1	1.85734e-24	1.3214	ZRANB2	1.3166e-09	0.810182	SSH2	1.07113e-12	0.283866	RPS19	9.81587e-34	1.73471	HLA-DQB1	1.14313e-34	4.09142	CD72	1.7517e-34	1.29559	TMEM39A	1.36354e-14	0.322256	NDRG2	1.99076e-12	1.37576	ZNF331	2.67263e-47	1.58696	MAP1A	2.53206e-26	1.39155	ANKRD13D	1.55822e-42	0.714162	MYDGF	0.00941676	3.66465	LBH	0.000955547	3.01476
1.13226e-10	0.264896	HSPA1B	1.977e-20	0.78939	TPST2	4.06428e-14	0.576048	OXNAD1	4.8182e-14	0.762533	BARD1	2.99881e-24	1.4525	GIMAP2	1.54076e-09	0.593606	TBC1D4	1.18701e-12	0.424908	PDCD4	1.01124e-33	1.47328	OTUD5	1.49925e-34	8.49138	GAPT	2.30306e-34	1.28954	PHPT1	1.45913e-14	0.384751	STK38L	3.9419e-12	1.05348	CLEC5A	2.79172e-47	0.44604	ST8SIA6	2.83159e-26	1.27395	IRAK3	6.69469e-42	0.449131	VOPP1	0.00951001	1.76624	ADAL	0.000970342	2.10599
1.15908e-10	0.660318	UBE2S	2.63251e-20	0.682672	FBXW5	5.17471e-14	0.321085	CD3D	4.9063e-14	0.675841	IGFLR1	5.91926e-24	1.10074	ST6GAL1	1.78021e-09	0.950997	ZBTB21	1.61407e-12	0.401957	GSTK1	4.20642e-33	1.29635	UGP2	2.74602e-34	2.64802	SMAP2	2.69776e-34	0.643617	OSBPL3	1.63073e-14	0.382383	PLSCR1	4.57514e-12	0.940936	ZNF385C	5.58374e-47	0.757692	YWHAZ	3.59389e-26	0.499816	CLK1	1.17697e-41	0.970593	SASH1	0.00960371	4.57966	SLCO4C1	0.000986938	3.31729
1.17177e-10	0.615107	F2RL2	2.73369e-20	0.321765	RPL27A	5.19949e-14	0.857424	RELB	6.38316e-14	0.331753	POMP	7.4284e-24	0.923926	EVL	1.87608e-09	0.574751	NXF1	1.97871e-12	0.292714	CAMK4	6.07824e-33	1.60305	KLHL2	9.36198e-34	2.77786	PTK2	2.86939e-34	1.89795	RGS1	1.67194e-14	0.378076	PSMA2	5.44097e-12	1.75133	FNDC3B	3.03942e-46	0.866829	ANAPC1	6.60209e-26	0.370508	TCEAL4	2.60198e-41	0.62084	LAMP2	0.00972619	7.42969	JAKMIP1	0.00101855	2.9879
1.4523e-10	0.328406	HLA-DRB6	6.09813e-20	0.757488	TES	5.71867e-14	0.693862	SUSD3	9.44287e-14	0.526427	AHI11	9.01046e-24	0.726903	MGAT4A	2.22558e-09	0.359839	SMAP2	2.61189e-12	2.06881	LPGAT1	1.47879e-32	0.526052	RGS1	9.96318e-34	4.22506	CLEC17A	3.04658e-34	1.41772	SLC17A9	1.80958e-14	0.615334	HIVEP2	6.38053e-12	1.08831	LCAT	3.14606e-46	0.806149	TRIB2	1.42902e-25	1.55747	CCDC88C	2.67592e-41	0.517489	PLBD2	0.00992632	7.68607	NINJ1	0.00104274	1.23511
1.54906e-10	0.313874	SATB1	7.38956e-20	0.854191	HIST1H1E	1.06122e-13	0.735807	KLRB1	1.27084e-13	0.274858	RNF19A1	1.19349e-23	1.1023	STK38	2.41934e-09	0.753256	RBM8A	2.98169e-12	0.57033	SPN	1.63519e-32	1.47285	HAVCR2	1.05386e-33	1.78414	RPSA	3.80177e-34	0.962086	NEAT1	1.81982e-14	0.394395	SLC7A1	6.86456e-12	1.70352	ICAM4	3.74963e-46	1.19444	MCTP2	1.53274e-25	0.332254	SPRED1	1.18169e-40	1.71916	NR1H3	0.00996422	0.314045	ARHGAP12	0.00105039	0.684248
1.64453e-10	0.736677	H2AFX	5.52581e-19	0.3124	RPL23A	1.08657e-13	1.50594	RBBP8	1.6546e-13	0.570107	SMARCAD1	1.55327e-23	1.11658	LY9	2.49865e-09	0.295715	RPLP1	3.99778e-12	0.47906	TMED2	3.3827e-32	1.29486	DDHD1	1.0875e-33	2.58036	LAT2	4.2062e-34	1.69182	LY96	1.96436e-14	0.505255	RPL7A	6.99703e-12	1.0262	TNFRSF1B	5.16993e-46	1.73152	PTRF	1.89866e-25	1.44295	UTRN	1.34781e-40	0.463264	LITAF				0.00105358	0.313088
1.67023e-10	0.511332	NFE2L2	6.84772e-19	0.742675	GAB3	1.36859e-13	0.889445	PITPNC1	1.88665e-13	0.426853	ETNK1	1.89754e-23	0.63943	RPS11	3.71428e-09	0.297702	SNX9	5.09602e-12	1.00309	APOL3	3.74301e-32	1.83112	DPYSL2	1.32487e-33	1.21666	RPL12	4.45717e-34	0.912665	RTN3	2.02774e-14	1.53409	DCK	7.72348e-12	1.40449	PMAIP1	7.15506e-46	1.01838	MAPK6	2.89899e-25	0.930303	NDRG2	1.9147e-40	1.92798	CXCL10				0.00106066	0.771602
2.33934e-10	0.594952	NAA50	7.54818e-19	0.918151	DSTN	1.4869e-13	0.310861	MT-ND5	1.96622e-13	1.55177	CHN1	2.30359e-23	0.42802	FTL	4.23485e-09	0.817217	NFATC1	6.00098e-12	0.610744	GZMM	4.14428e-32	1.19345	COX17	1.44667e-33	1.06376	IFITM2	5.35316e-34	1.42552	TXN	2.05945e-14	0.688284	IL2RG	9.24449e-12	0.656895	PPP1R15B	1.33727e-45	0.6589	C1ORF228	3.57907e-25	1.10947	LILRB1	2.03214e-40	0.29326	CTSA				0.00106405	1.08093
2.3945e-10	0.44619	ZBTB21	9.09057e-19	2.3196	TTC16	2.06321e-13	1.03	CHN2	2.08643e-13	0.542812	ASXL2	4.76198e-23	0.616392	IFITM1	4.34677e-09	0.631653	MRPL1	6.16144e-12	3.664	ELOVL6	4.71569e-32	1.15907	GATA3	1.52087e-33	3.7087	IL4R	3.60096e-33	2.76577	HSPA1A	2.0913e-14	0.722211	NME1	1.09954e-11	1.62049	PDE4A	1.45763e-45	0.26682	DNAJB1	4.4151e-25	0.342843	ARHGAP10	2.52024e-40	0.601455	IL18				0.00107337	0.807153
2.40342e-10	0.544886	MAFF	1.1177e-18	0.803889	LINC00944	3.85392e-13	0.512727	SURF4	2.32758e-13	0.309429	SLC7A51	5.29957e-23	0.666917	RPL28	5.47264e-09	0.807379	HSPH1	6.29299e-12	0.986271	CALHM2	5.83229e-32	1.8333	NRIP1	1.83842e-33	2.3447	RCSD1	4.33508e-33	2.34526	NCLN	2.22595e-14	0.259602	RGS10	1.26201e-11	0.334816	MIER1	2.03411e-45	1.83886	KIAA1549	4.89103e-25	0.308609	GALC	4.15117e-40	0.637677	RALA				0.00108127	1.10688
2.49945e-10	0.453604	BRD2	1.14503e-18	0.738277	CDC42SE1	3.90632e-13	0.516995	SERTAD11	2.3331e-13	0.60229	SNX91	7.45796e-23	1.5739	ADPRM	6.31945e-09	0.527114	ZDHHC13	6.43791e-12	0.430716	HCST	8.16501e-32	0.823494	SQSTM1	2.13056e-33	1.84811	TPM3	5.19052e-33	4.6212	HIST2H2BE	2.2891e-14	1.07691	KBTBD8	1.32577e-11	0.323066	PID1	4.51878e-45	0.624205	NFKBIA	5.3344e-25	1.49277	ZNF467	4.89316e-40	0.54848	FCGR2A				0.00114835	0.293046
2.81666e-10	0.352266	CRTAM	1.25267e-18	1.02543	MYBL1	4.06649e-13	0.492653	ATF7IP	2.48568e-13	0.420249	HLA-DRB61	1.63831e-22	1.44016	PIK3CD	6.86055e-09	0.803753	TRPS1	6.97739e-12	0.491682	RGS14	1.26556e-31	0.591049	UBC	2.92798e-33	1.73808	RAC2	7.05225e-33	1.32488	ZBTB38	2.71757e-14	0.577752	PRMT9	1.45787e-11	1.51149	ISG20	8.98471e-45	1.21961	MAGED2	6.00959e-25	1.61561	SULT1A3	1.04713e-39	0.790322	GLA				0.0011743	0.473546
2.82669e-10	0.299226	BRAF	1.378e-18	0.446624	ZAP70	4.47634e-13	0.803876	TSPYL21	2.82311e-13	0.606842	RANBP1	1.64612e-22	2.86059	SLC40A1	6.99634e-09	0.301836	PTMA	8.22279e-12	0.366413	CDC14A	3.62571e-31	1.37604	HSPB1	1.28482e-32	1.29116	RPL14	8.1234e-33	1.44153	CITED2	2.97842e-14	0.432492	OSTC	1.651e-11	0.809556	BEST1	9.51671e-45	0.510525	MORF4L2	7.80847e-25	1.51694	CARS2	1.06589e-39	0.898527	LGALS3				0.00120453	0.984894
2.83129e-10	0.516285	TRDMT1	2.6946e-18	0.471694	GNLY	4.81392e-13	0.780285	GLA	3.58053e-13	0.385864	MYO1E1	1.79614e-22	1.0736	KLF3	7.46342e-09	0.949061	CEP128	1.08511e-11	0.74617	IER2	1.00791e-30	0.366638	HLA-C	2.12273e-32	1.01245	RPS11	1.02311e-32	1.36277	VKORC1	3.37219e-14	0.268375	GSTM4	2.02579e-11	1.29034	DMD	1.01126e-44	0.65263	ELF1	1.0638e-24	1.62967	NDFIP2	1.338e-39	0.756795	SGPL1				0.00120513	1.45127
3.22674e-10	0.419534	SLC16A1	6.42497e-18	0.915961	LAIR2	4.84572e-13	1.2728	LAYN	4.20071e-13	0.30439	IL2RG	3.0585e-22	1.13266	DENND2D	9.0889e-09	0.871837	BEST1	1.16505e-11	1.54436	SMAD3	1.09052e-30	1.53454	BCL2L1	2.49988e-32	3.90078	FMNL3	1.15857e-32	1.38134	ARMCX3	3.47828e-14	0.748258	TLR10	2.17968e-11	1.15979	MAP2K3	1.11705e-44	1.0367	TLDC2	1.28864e-24	1.14537	IMPDH1	2.4796e-39	0.35884	GADD45B				0.00120535	1.29058
3.4918e-10	0.413567	SORL11	7.52136e-18	1.45137	GUSBP2	4.88182e-13	1.30733	NFKBID	5.3106e-13	0.425628	CCR5	5.54008e-22	1.27546	THEM4	9.45343e-09	0.352817	GLCCI1	1.25542e-11	0.337004	CD47	1.56862e-30	1.75857	CCNG2	3.72929e-32	1.95234	ELOVL5	3.68779e-32	0.466024	MARS	3.7108e-14	0.426726	PSMB4	2.2505e-11	2.07542	NFIL3	1.26736e-44	1.38202	GPR65	1.64841e-24	2.26192	MSRB1	3.04783e-39	0.776537	ANXA2				0.00123838	1.47759
3.55572e-10	0.460974	MALT1	8.75364e-18	1.48249	FUT11	6.40562e-13	0.317956	STAT41	5.7578e-13	0.442288	PMF1	5.83282e-22	0.825639	PFDN5	9.66526e-09	0.281336	ZNF33B	1.25628e-11	0.555821	CLDND1	3.56263e-30	2.39061	ATP1B1	4.34204e-32	2.44544	COL19A1	6.13804e-32	1.42805	HSD17B8	3.7357e-14	0.527111	CDC42SE2	2.74319e-11	0.767735	LINC00707	1.40104e-44	0.532836	FOSB	1.99002e-24	0.566204	FPR1	3.89758e-39	0.618721	HLA-DOA				0.00124416	0.586891
3.89667e-10	0.391203	PDE7A	9.20876e-18	0.555905	PTP4A2	6.76125e-13	0.889837	P2RX4	7.14266e-13	1.56814	HAPLN3	6.39757e-22	1.52379	TMIGD2	9.97711e-09	0.363276	P2RY10	1.49466e-11	1.45706	BCL2A1	8.27288e-30	0.656202	SLC41A1	5.69085e-32	1.23485	RPL28	6.34241e-32	1.33801	NANS	3.74912e-14	0.520275	RAN	3.3563e-11	0.456955	TNRC6B	1.67655e-44	0.725445	HSP90AB1	2.46625e-24	0.254866	ACTB	5.34529e-39	0.492893	GPR183				0.00126006	1.40082
4.23272e-10	0.684111	HSPE1	1.22084e-17	0.440529	SYNE2	6.97374e-13	0.614824	SLC12A6	7.65506e-13	0.281888	CD8A	6.71617e-22	0.995163	GIMAP6	1.08228e-08	2.17232	CHI3L2	1.67711e-11	0.682396	RASSF1	1.06841e-29	1.29045	IL18R1	6.7379e-32	1.24618	HLA-A	7.36356e-32	1.51494	MIR155HG	4.00517e-14	1.03195	GNG7	3.57338e-11	0.84402	GPR183	2.02953e-44	0.760788	TMEM255B	2.64036e-24	1.26877	ERICH1	7.73697e-39	1.66695	SLC16A10				0.00126445	1.55937
4.64715e-10	0.51975	SBDS	1.34876e-17	0.32106	HLA-E	9.22955e-13	0.403881	CLIC5	9.44816e-13	0.310974	CD71	7.57549e-22	1.35741	NIPAL3	1.11517e-08	0.526979	SIK1	1.89276e-11	0.26164	MT-ND2	1.29661e-29	0.504174	PFN1	7.62107e-32	3.68865	GSAP	8.41717e-32	0.688228	OS9	4.13349e-14	0.453998	RPS4X	3.68609e-11	0.383781	DNAH2	2.60576e-44	1.12539	C10ORF128	2.71584e-24	1.13063	CEBPD	8.92335e-39	1.1085	HSPA1B				0.0012909	2.19033
5.74579e-10	0.283835	VPS37B	1.34963e-17	0.309641	RPL18A	1.00608e-12	0.375804	PPP1R15B1	1.06e-12	0.256338	DRAP1	8.63421e-22	0.576406	RPL24	1.11679e-08	0.973048	MAN2A1	2.30269e-11	0.379061	PRKCB	1.95487e-29	0.841785	IGFLR1	8.96322e-32	2.55398	SIPA1L1	8.66641e-32	0.743745	TMEM205	4.15739e-14	1.80078	SERPINF1	3.8519e-11	1.48149	GRASP	6.03183e-44	0.515539	ZC3H12A	2.98084e-24	1.13767	CCND2	1.09351e-38	0.486314	SLC38A6				0.001298	0.796254
5.8255e-10	0.428634	IKZF5	2.20736e-17	0.552122	PTPN4	1.20705e-12	0.301577	MT-ND1	1.26817e-12	0.612187	ARID5B1	1.19375e-21	0.876709	GPSM3	1.21371e-08	1.02678	CYCS	3.67173e-11	0.516839	ANXA6	3.03026e-29	1.26693	RAB33A	1.0788e-31	1.80665	IFI16	1.24754e-31	0.529105	ATXN1	4.26443e-14	0.402475	RPS2	3.86989e-11	0.65804	VCAN	7.92121e-44	0.891338	SDCBP	3.00419e-24	1.45848	CDKN1C	2.17871e-38	0.629999	GPRIN3				0.00133935	1.975
6.13642e-10	0.825142	HEXIM1	2.92492e-17	1.13952	LPAR6	1.82251e-12	0.576857	GALNT2	1.36205e-12	0.840706	PDLIM71	1.83792e-21	2.00865	FAM117B	1.25656e-08	0.49111	IVNS1ABP	3.92957e-11	0.87235	DYNLT3	5.38799e-29	1.57212	PHACTR2	1.15656e-31	2.37599	LBH	1.32992e-31	3.48591	RUNX2	4.32998e-14	0.640407	CDK2AP2	4.22423e-11	1.64174	TMEM88	8.44306e-44	0.578023	BEX4	3.05217e-24	1.62577	MBD2	3.9312e-38	0.684211	IFI30				0.00133951	1.10301
7.38998e-10	0.497258	ARIH1	5.284e-17	0.550758	PSMB8-AS1	2.34822e-12	0.365975	GLIPR1	1.48833e-12	0.325333	GTF3C6	2.16072e-21	0.435652	MT-CYB	1.28769e-08	1.09646	SYAP1	5.18581e-11	2.89648	PLEKHG3	5.70816e-29	0.697955	SOD1	1.20668e-31	0.83352	ADGRD1	1.33393e-31	0.352039	LGALS3	5.40316e-14	0.468298	PEA15	4.48892e-11	1.07152	CD93	1.13973e-43	0.48027	TSC22D2	3.37802e-24	1.04833	EIF5	8.5121e-38	1.5839	IGFBP4				0.00134422	0.675467
7.77485e-10	0.547546	SYAP1	5.45675e-17	0.721416	GVINP1	2.36172e-12	0.68014	IKZF2	1.55588e-12	0.267626	RAB27A	2.78602e-21	1.5965	STAG3L1	1.30095e-08	1.21389	AGPAT5	5.96679e-11	0.828037	MAP3K8	6.46262e-29	1.52919	MICAL2	1.36296e-31	6.10052	CCDC141	1.53801e-31	1.28036	MIF	5.74512e-14	1.38395	MCM6	5.00996e-11	2.26817	THBS1	1.43565e-43	1.2589	PRKD3	4.2479e-24	0.753734	MTRNR2L8	1.08917e-37	1.4333	KCNMA1				0.00137376	0.770777
7.7795e-10	0.64188	TOB2	6.94985e-17	0.416288	ANXA6	2.97494e-12	0.534046	MORF4L2	2.31755e-12	0.500508	CRTAM1	2.85065e-21	1.27798	GVINP1	1.43642e-08	0.281377	PDE4D	7.03333e-11	1.26468	SPG20	1.04913e-28	1.02628	TSPAN5	1.65407e-31	2.92482	LPP	2.25168e-31	1.05707	CLIC4	6.25667e-14	0.494663	PARK7	5.15964e-11	0.327779	SOS2	2.69052e-43	0.622653	TAGLN2	4.59145e-24	1.36866	PLEKHO1	1.98097e-37	0.654491	PHLDA1				0.00140264	0.321829
8.47023e-10	0.599	CHORDC1	7.36046e-17	0.314504	CYTH1	3.00638e-12	0.676475	EVI2A	2.4382e-12	0.408942	EIF4EBP1	3.08696e-21	1.21606	SRSF1	1.56932e-08	0.830491	HSPD1	7.36389e-11	0.689305	ITGB1	1.27654e-28	1.03789	RAB11FIP1	1.91798e-31	0.920587	TMSB10	2.39737e-31	0.649577	ARF4	6.52646e-14	0.366404	POMP	5.28203e-11	2.41646	BASP1	3.14505e-43	0.87115	SNRPN	7.02359e-24	0.280911	TMEM109	8.94529e-37	0.536685	PCBD1				0.00141732	0.911635
9.04899e-10	0.311702	ZNF831	1.17881e-16	0.872461	ARHGAP10	3.00908e-12	0.342651	FAM3C	2.57348e-12	0.312122	CORO1A1	4.03631e-21	2.42928	RNF157	1.61074e-08	1.71694	PGAP1	1.1685e-10	0.755925	MAPK1	1.2773e-28	1.78327	2022-03-03	4.48111e-31	1.03529	RPS13	2.68838e-31	1.58775	VIM	6.66508e-14	0.305596	FABP5	5.6084e-11	1.60669	LPCAT1	3.39246e-43	1.11849	PDE7B	7.68518e-24	0.557514	FGL2	9.42365e-37	0.515754	TNFSF13				0.00149499	0.922981
9.19266e-10	0.893192	NAF1	1.31235e-16	1.05649	TNFRSF1A	3.26539e-12	0.368573	FAM53C1	2.74046e-12	0.93631	SLC35F2	4.56333e-21	0.92835	IL16	1.71896e-08	0.406115	HMGN1	1.38249e-10	0.679739	PPP1R15A	1.3514e-28	1.13228	HSPA1B	6.85486e-31	1.46206	UVRAG	3.14351e-31	1.19603	COX5A	6.89113e-14	0.943582	PALD1	6.6339e-11	0.665358	PLEKHG2	1.7757e-42	0.776642	LINC00863	7.95448e-24	1.20073	CD244	1.97444e-36	0.596652	BCAP31				0.00150557	2.14361
1.20143e-09	0.259485	AHNAK1	1.83512e-16	0.629336	MFNG	5.41343e-12	0.545499	IRF2BP2	2.86235e-12	0.275219	PSMB91	5.1757e-21	0.669314	RPL35	1.75166e-08	1.10839	ZNF10	1.49308e-10	0.852157	ANK3	1.41827e-28	1.59032	SHMT2	9.39595e-31	0.728578	RPS29	3.44186e-31	4.1704	HIST1H2BJ	7.32964e-14	0.650787	IDH2	6.76842e-11	2.29244	FLT1	3.25518e-42	1.1764	TMOD3	9.71717e-24	1.25331	VCL	2.0171e-36	0.887701	MGAT1				0.0015448	0.861199
1.28316e-09	0.551334	FOXP1	1.88017e-16	0.426245	PYCARD	6.071e-12	0.937979	C10ORF128	3.27597e-12	0.634805	ARPP19	5.81389e-21	0.598201	FAU	1.84541e-08	0.50835	RARRES3	2.02106e-10	0.962518	TNFSF10	1.41927e-28	0.646566	PRDX1	9.89787e-31	1.22523	UBA52	3.8244e-31	0.749522	ERGIC2	7.4198e-14	0.936495	GEM	8.1222e-11	0.718268	MCL1	3.30481e-42	0.817997	PAG1	1.01499e-23	2.0591	GZMH	4.4116e-36	0.822924	AMDHD2				0.00155019	0.653706
1.28899e-09	0.926085	ITGA5	2.43215e-16	0.330959	PPP1R18	6.50948e-12	0.458119	NME7	4.71924e-12	0.427452	USP18	9.46958e-21	1.0571	INPP4B	2.48358e-08	1.3747	IRF2BP2	3.11225e-10	0.519505	AIM1	1.46051e-28	0.692914	TMEM173	1.58815e-30	1.48492	PIK3IP1	5.56414e-31	0.869904	TMEM263	8.4874e-14	0.410256	RPL6	1.33013e-10	0.816549	TOMM40L	3.92498e-42	0.497759	CSF2RB	1.06338e-23	1.10928	ARHGEF1	4.87e-36	1.38689	HSPA1A				0.00156598	1.82915
1.41258e-09	0.373066	BCAS2	3.34111e-16	0.423034	GTF3A	7.86809e-12	1.12425	ZNF250	4.97466e-12	0.637226	PDE4DIP	1.55585e-20	0.976148	MDM4	2.55839e-08	0.391079	MAP3K8	3.57432e-10	0.80337	PITPNC1	1.4676e-28	0.794984	NFAT5	2.00087e-30	0.947899	RPS19	7.4271e-31	0.582476	P2RX1	8.93511e-14	0.712756	UCP2	1.45615e-10	1.32749	ACACB	1.23934e-41	0.973878	RALGAPA1	1.71998e-23	1.33305	NHSL2	8.39505e-36	1.29676	CSTB				0.0015999	0.828105
1.52817e-09	0.266757	PTPRC	3.60107e-16	0.699555	C5ORF56	7.87302e-12	0.780408	TRAF1	5.17972e-12	0.286097	RHOA	1.67694e-20	1.12923	BEX3	2.59167e-08	0.888722	ZNF410	3.61674e-10	0.716903	SEC61A1	1.60484e-28	0.59887	NEDD9	2.52258e-30	1.04283	RPL26	8.06085e-31	1.61261	JUN	9.41507e-14	1.25712	RAB9A	1.49207e-10	1.85606	FAM86B3P	1.40452e-41	1.8527	TOX	2.0254e-23	0.926217	NUP214	9.02975e-36	0.732164	MGST3				0.00160828	1.17239
1.57838e-09	0.511143	RNF138	3.70174e-16	0.724494	FLOT2	8.75262e-12	0.512065	DNAAF2	5.95593e-12	0.318128	HLA-DQA2	1.89989e-20	1.46969	PDE3B	2.59435e-08	0.444453	RIN3	3.75111e-10	0.345322	CYBA	1.91743e-28	0.968286	ZBTB38	2.52645e-30	4.43139	SNX29P1	8.187e-31	1.73378	SAR1B	1.0577e-13	0.414385	RPS19	1.59771e-10	0.373725	KCNJ14	2.63584e-41	0.592638	PMEPA1	2.21513e-23	0.908924	TMEM71	9.08906e-36	0.341688	MS4A7				0.00162127	0.285571
1.83274e-09	0.354664	BTBD19	3.77897e-16	0.727258	LEF1	1.28093e-11	0.512958	ZC3H12A1	6.50461e-12	0.562245	ERI1	9.42998e-20	1.629	MLLT3	2.61998e-08	0.337354	DDX5	3.77825e-10	0.445284	RPS6KA3	4.75493e-28	0.797431	SPOCK2	2.84116e-30	3.92383	TCL1A	1.20382e-30	0.601189	MLEC	1.11721e-13	1.07682	UCK2	1.62361e-10	2.18651	HCAR2	1.08608e-40	0.360055	NR4A3	2.54172e-23	0.271202	HSCB	2.41452e-35	0.914246	HLA-DPB2				0.0016368	2.45698
2.30278e-09	0.319147	ISG20	4.15436e-16	0.707489	TMEM223	1.55593e-11	0.306376	CYTIP	6.64197e-12	0.382199	PSMA2	1.23387e-19	1.65172	LINC01089	3.16467e-08	0.415991	PTPN22	4.05669e-10	0.942903	CA5B	5.45645e-28	1.10684	LY75-CD302	3.23871e-30	2.43268	ARPC1B	1.20587e-30	1.25985	DERL1	1.16199e-13	0.480164	SRP14	1.87144e-10	0.663335	OLFML2A	1.10906e-40	0.461093	LDHB	2.93052e-23	0.786957	MTRNR2L1	2.5343e-35	0.353938	RALGDS				0.00165944	1.45542
2.79753e-09	2.83907	NTRK3	4.6189e-16	0.491505	DGKZ	1.7098e-11	0.433749	TMEM123	7.69473e-12	0.378535	COTL11	1.38912e-19	1.16066	THEMIS2	3.5781e-08	0.843668	EMD	4.40071e-10	0.419431	MYO1G	6.26722e-28	0.957574	SLAMF1	4.0734e-30	4.63599	MCOLN2	1.43205e-30	1.73586	FICD	1.17913e-13	0.400568	PPIB	1.91399e-10	0.864121	CTNNB1	1.14007e-40	1.91215	C5ORF30	2.98966e-23	1.06357	CDKN2D	2.65452e-35	0.580402	GAS6				0.00180124	0.671148
2.86524e-09	0.481911	RASA1	4.77338e-16	1.12186	GIMAP8	2.43248e-11	0.304261	TPI1	8.00659e-12	0.599129	PLPP11	1.42741e-19	0.523738	FYB	5.87379e-08	1.32021	ZNRF1	4.53564e-10	0.521186	CKLF	6.47547e-28	0.808719	EFHD2	4.46023e-30	2.66539	MBP	1.5609e-30	2.31456	SEC24A	1.26188e-13	0.300663	OFD1	2.03173e-10	0.297095	SF3B1	1.732e-40	0.798631	SERINC3	3.57582e-23	0.742936	SVIL	3.24442e-35	0.347088	HSP90AA1				0.00180653	3.38726
3.10805e-09	0.391899	TUBA1C	5.4426e-16	0.314975	KLF3	2.44499e-11	1.28917	SSH1	8.26272e-12	0.262733	ARPC2	1.76727e-19	1.73721	ANKRD55	6.88084e-08	0.399836	DNAJB14	4.56227e-10	0.299511	RPLP1	8.07096e-28	1.15828	TBC1D8	4.84227e-30	0.988306	RPS25	1.67218e-30	1.27207	BST2	1.31204e-13	0.311457	RPL13	2.48157e-10	1.41184	CDC37	1.76862e-40	0.619434	S1PR1	4.50001e-23	0.80579	SULF2	3.26102e-35	1.1422	LSS				0.00182956	1.30527
3.11281e-09	0.369287	TUBA1A	5.75878e-16	1.03353	PLEKHA1	2.49464e-11	0.514148	DOCK5	1.06722e-11	0.336613	FAM3C1	2.0922e-19	1.7781	RASA4	7.50669e-08	0.474871	SERINC5	4.73947e-10	1.33512	PPP2R2B	1.01967e-27	0.498219	ACTB	8.0704e-30	2.42413	ZC3H12D	1.90134e-30	1.21956	TMEM147	1.33026e-13	1.20958	MYCL	2.83248e-10	1.82858	PAPSS2	1.89359e-40	0.438027	2022-09-02	5.06841e-23	0.843419	CTNNBL1	4.9706e-35	0.778354	ATOX1				0.00184414	2.79298
3.49511e-09	0.543283	ARHGAP26	5.82463e-16	0.529543	IQSEC1	4.11061e-11	0.420445	TNIP3	1.25222e-11	0.715586	KDM5B	2.12633e-19	0.508907	CD27	8.65545e-08	0.412142	ATG2A	5.36648e-10	1.1544	JUN	1.09729e-27	1.37449	CCDC141	8.3275e-30	0.916326	RPL39	2.3513e-30	0.932534	BSG	1.4742e-13	0.325691	ATP5J	3.01433e-10	0.617835	FCGR2A	4.07474e-40	0.993345	WDR35	7.49569e-23	0.622707	MYO1G	1.4438e-34	0.442257	AKR1A1				0.00185432	0.708688
3.70496e-09	0.87284	STX11	6.04537e-16	0.606836	ZRANB2	4.43929e-11	0.376327	RPS16	1.4176e-11	0.356894	GALM1	2.5305e-19	1.33498	CCDC18-AS1	9.07094e-08	0.815204	MTHFD2	5.6301e-10	0.443256	STK10	1.47022e-27	1.66568	HLA-DRA	8.36664e-30	1.71276	SNX9	3.41624e-30	1.27219	FTL	1.53031e-13	0.695678	YPEL5	3.31455e-10	0.382509	TPCN1	6.94453e-40	1.12272	SEMA4A	8.65493e-23	1.22886	ARAP1	1.57018e-34	1.18538	TFRC				0.00186537	1.06001
3.84649e-09	0.581385	HBP1	7.69563e-16	0.622151	SAMHD1	4.60295e-11	0.531778	P2RY10	1.59763e-11	1.0134	MCM5	2.64583e-19	1.27494	SYNJ2BP	9.51077e-08	1.42351	SREBF2	6.85182e-10	0.397033	PATJ	1.68911e-27	0.676707	TNIP1	8.48496e-30	1.11234	EEF1G	3.53817e-30	1.06461	LRPAP1	1.63279e-13	2.36451	S100B	3.38132e-10	2.3022	NEBL	1.39252e-39	3.76102	SORBS1	1.04458e-22	1.15242	APBB1IP	2.38341e-34	0.968407	ABCG1				0.00186935	1.11679
4.40792e-09	0.563129	ATP5E	8.70057e-16	0.479681	TC2N	4.768e-11	1.00848	BLM	1.89269e-11	0.416346	RHBDD2	5.15567e-19	1.48017	LRRN3	9.51938e-08	0.935935	PPP1CB	8.027e-10	0.305177	MT-ND6	1.82508e-27	0.848876	PPM1G	1.08651e-29	4.83911	ARRDC2	4.21559e-30	0.972476	CUTA	2.24562e-13	0.305312	TXNDC17	3.75598e-10	0.337637	RGPD4-AS1	1.4464e-39	0.693345	HSPA5	1.13739e-22	2.55106	NLRP12	3.60295e-34	1.09727	ATP1B1				0.00188308	1.52044
4.45861e-09	0.577381	ADAMTSL4	1.19688e-15	0.318914	RPL5	4.79606e-11	0.338343	CLK11	2.05623e-11	1.08378	LAYN1	8.37665e-19	1.03623	EIF2S3	9.57031e-08	0.899613	SESN2	9.68034e-10	0.760235	TTC39C	3.09814e-27	1.03588	CFLAR	1.11573e-29	0.916915	MIPOL1	4.87856e-30	0.794511	AKR1A1	2.27986e-13	0.478648	RAB11A	3.77175e-10	1.45867	CHD1	2.02379e-39	0.809864	STXBP5	1.7193e-22	1.11781	AGTRAP	5.43164e-34	0.542906	ALOX5AP				0.00198967	0.637206
4.54094e-09	0.430998	RBM47	1.26136e-15	0.330836	CEPT1	5.83064e-11	0.869264	LIMS3	2.12323e-11	1.07633	CD200R1	9.27558e-19	1.06974	PIM1	1.08693e-07	0.482886	IFI16	9.8016e-10	0.687334	C1GALT1	3.42005e-27	0.892867	COX5A	1.47948e-29	2.80498	NFATC1	5.14828e-30	1.38901	CASP10	2.30618e-13	0.463551	RPS16	3.93759e-10	0.572026	BRD3	2.75086e-39	0.938158	RBBP8	1.79662e-22	1.94443	ADD3	6.52606e-34	0.902246	EPB41L2				0.00199622	1.18069
4.57994e-09	1.0609	TNF	1.423e-15	0.562861	STK10	6.56646e-11	0.528537	DENND4A1	2.1377e-11	0.33109	TXN	9.79943e-19	1.03212	ZNF740	1.09814e-07	0.825467	IFNG	1.09961e-09	0.60982	DANCR	5.0479e-27	1.98383	CEACAM1	3.43683e-29	3.97479	SNX22	5.70864e-30	1.26506	DSTN	2.30759e-13	0.321446	CXORF21	4.21625e-10	1.81874	KLHL21	5.67192e-39	0.796611	CD84	1.91852e-22	0.270989	TMBIM6	7.26599e-34	0.603704	GNB4				0.00214083	2.23355
4.59472e-09	0.56655	TBCD	1.92535e-15	0.667503	ZNF276	6.92145e-11	0.685635	TTC39C	2.14694e-11	0.860994	PELI1	9.9962e-19	0.383502	RPL38	1.36031e-07	0.81163	ABCG1	1.14006e-09	0.620131	CHD7	5.15134e-27	0.947334	LRRC61	3.57817e-29	1.57828	RUNX3	5.72325e-30	0.977447	ANXA5	2.72057e-13	0.324206	LSM5	5.13202e-10	0.89024	MARCKS	6.68404e-39	0.322571	PHF20	1.96702e-22	0.619681	RPL34	7.26636e-34	0.808667	LAMP1				0.00218703	1.19214
4.65358e-09	0.507154	NOP56	2.32987e-15	0.285771	PPIA	7.94429e-11	0.413339	HERC1	2.1904e-11	0.354622	BLOC1S1	1.04023e-18	1.21326	STAG3L2	1.37908e-07	1.58644	CITED2	1.22637e-09	1.4666	ABCA2	5.80135e-27	1.18746	PXK	5.47222e-29	4.23045	DOPEY2	6.31183e-30	1.56471	TYRO3	2.95282e-13	0.46634	RACK1	9.55097e-10	1.59306	RETN	7.55404e-39	0.568624	ELOVL5	2.06956e-22	1.20768	UBE2S	1.59053e-33	0.791039	DNAJB1				0.00222934	1.92076
4.72102e-09	0.343057	ATXN7L11	2.49505e-15	0.550347	LINC00987	8.53348e-11	1.16993	CD9	2.25734e-11	0.323802	ATXN11	1.95765e-18	1.31742	DPH5	1.52822e-07	0.673616	RNF149	1.44544e-09	1.64416	RASGEF1B	7.18066e-27	1.35167	SMS	5.64743e-29	1.48855	PTPRCAP	6.51673e-30	0.867104	SERP1	3.08889e-13	0.302364	POLR2G	1.11767e-09	1.59682	PNPLA8	7.91245e-39	0.772	MYH10	2.23885e-22	1.33363	YPEL3	2.13795e-33	0.315704	GRN				0.00223554	0.645516
4.93316e-09	0.623623	MYLIP	2.99242e-15	0.912951	NSUN5P2	9.80552e-11	0.365607	ABI3	2.66114e-11	0.351332	NDUFB3	2.05857e-18	0.910746	DDX17	1.67019e-07	1.33249	PHLDB3	1.55033e-09	0.453974	MAP4	8.06339e-27	0.799712	MYO1G	5.8681e-29	1.01289	HLA-E	9.49643e-30	0.386087	SEC14L1	3.37041e-13	0.403281	SUMO3	1.14732e-09	1.69768	RGCC	8.57609e-39	1.15766	MAPK1	2.43437e-22	0.904529	USP53	5.07733e-33	0.863467	SNX9				0.00224676	0.735595
5.25187e-09	0.323732	ZFP36L2	4.21323e-15	0.707214	PCMTD2	1.08567e-10	0.419831	CCDC138	3.42292e-11	0.324824	CYTIP1	2.2481e-18	0.802744	P2RY8	1.69938e-07	0.827849	NSMCE3	1.57806e-09	0.57436	CCDC107	8.3451e-27	1.37529	INPP5F	6.3777e-29	4.22469	SIGLEC10	1.28801e-29	6.90477	SCNN1B	3.59627e-13	0.696361	IL13RA1	1.63987e-09	0.330778	PIK3R6	1.07266e-38	0.995634	TSPYL1	2.71093e-22	0.581695	RGPD4-AS1	6.03853e-33	0.559296	PLA1A				0.00225189	1.83794
6.08052e-09	0.306183	EIF5	5.41729e-15	0.758145	SLFN5	1.09291e-10	0.517602	TMEM184C	4.04082e-11	0.496956	SLC5A31	2.80209e-18	0.980235	POLR2J3	1.71391e-07	0.554681	GTF2B	1.85586e-09	0.689304	KDM4C	1.01907e-26	0.541253	GEM	7.16914e-29	3.15806	FCRL3	1.40044e-29	0.97948	TFG	4.55905e-13	0.514814	GAS6	2.0663e-09	1.1685	PLK3	1.25176e-38	1.22118	ATP10A	3.50545e-22	2.0908	EIF4E3	7.40801e-33	0.553433	EIF4A3				0.0022721	0.879817
7.22339e-09	0.304064	PABPC1	6.81363e-15	0.315393	RPL14	1.21404e-10	0.573165	TP53I13	4.32728e-11	0.273572	SH2D1A1	2.82852e-18	1.08588	IL6ST	2.46596e-07	0.683957	PABPC1	2.18214e-09	0.417079	CST7	1.27066e-26	1.34171	EZH2	8.77189e-29	4.14729	SORL1	1.95325e-29	2.28581	GMPPA	4.6153e-13	0.382626	ALG2	2.37674e-09	0.936997	SKIL	2.92014e-38	0.313065	RFX2	4.00615e-22	1.20649	FMN1	9.93146e-33	0.582823	HLA-DRB6				0.00230787	1.49664
7.9648e-09	0.409623	HSPA1A	7.84998e-15	0.57823	KIF2A	1.39323e-10	0.468749	TCIRG1	4.36445e-11	0.330923	CKLF1	2.87699e-18	1.18847	TOMM7	2.50872e-07	1.14557	RAB27A	2.25869e-09	0.345389	LY9	1.39429e-26	0.841128	IFI27L2	9.15798e-29	2.27786	ELMSAN1	3.66602e-29	1.06941	EDEM2	4.86606e-13	0.447057	TMED10	2.88258e-09	1.06953	CEBPB	4.06859e-38	0.889145	CYTH3	6.0221e-22	0.493946	GOLIM4	1.47532e-32	0.432244	PDIA4				0.00245489	0.563883
8.18121e-09	0.48826	NFATC2	8.33759e-15	0.516472	TBC1D10C	1.58655e-10	0.796988	CCDC69	4.39095e-11	0.413822	MX1	5.55849e-18	1.39851	NUCB2	2.66085e-07	0.296537	DGKA	3.3566e-09	0.599676	SSBP4	1.44599e-26	1.92855	VAV3	1.0432e-28	3.82784	GRAP	4.16031e-29	0.78303	EDEM3	4.88841e-13	0.286554	CIB1	3.54214e-09	0.864571	FSIP2	4.19306e-38	1.76284	HSPG2	1.0066e-21	1.69079	KCNE3	6.94288e-32	0.513921	CD59				0.0025303	1.56961
8.53553e-09	1.35601	PPP1R13B	9.09176e-15	0.650048	RPA2	1.71198e-10	0.363066	DNAJA11	4.9525e-11	0.799918	APOBEC3F	7.9713e-18	1.52148	PRR4	2.93715e-07	0.256989	KLF6	3.38373e-09	0.849601	NMRK1	2.95727e-26	1.95115	FNDC3B	1.80789e-28	1.63191	ANKRD44	7.50689e-29	0.834427	NDUFC2	5.23446e-13	0.404118	CD80	3.73056e-09	1.19758	GSDMA	5.47157e-38	0.694775	AHNAK	1.08993e-21	0.8955	RAB11FIP1	7.71943e-32	1.69757	GAS2L3				0.0025587	1.31082
9.11052e-09	0.462433	PPP1R2	1.00415e-14	1.07816	TENM1	2.51085e-10	0.484447	UBAC2	5.80783e-11	0.640035	MT1X	8.78609e-18	1.36107	ZNF302	3.13284e-07	0.634909	NDUFV2	3.92606e-09	0.591663	TGFB1	3.4558e-26	0.347133	S100A6	1.81652e-28	1.00637	RPS9	7.67926e-29	1.22924	INSR	6.46297e-13	0.907163	PTMS	3.95368e-09	1.87994	STX4	1.387e-37	0.540846	PTMA	1.19681e-21	1.09577	PNISR	1.07422e-31	0.294922	FAM20A				0.00255929	0.952883
1.05094e-08	0.403952	NOP58	1.10805e-14	0.505636	DECR1	2.78249e-10	0.694573	PLCG2	6.62144e-11	0.273295	HMGN1	1.0582e-17	2.86906	MDS2	3.16994e-07	0.517917	IFITM1	3.92978e-09	0.299196	NFATC2	3.93082e-26	0.799208	PHTF2	2.20698e-28	4.7421	SCML4	1.04311e-28	0.936166	MPC1	6.53026e-13	0.279806	COX5A	4.35297e-09	1.08251	ANKEF1	1.99659e-37	0.885791	PDIA3	1.21055e-21	1.59088	CR1	1.24419e-31	0.330947	PEA15				0.00257852	2.16647
1.08024e-08	0.729712	METRNL	1.22405e-14	0.486615	ARHGAP30	2.90054e-10	0.356589	CYCS1	6.75752e-11	0.55286	CTSA	1.40912e-17	1.30623	C11ORF21	3.17784e-07	0.313038	MCL1	3.95597e-09	0.575241	SND1	4.00899e-26	0.749108	TXNDC17	2.25461e-28	1.90359	NPIPB5	1.15281e-28	1.27028	SUB1	8.14298e-13	0.368229	SNRPB	4.36964e-09	0.572491	PLSCR1	2.14562e-37	1.16186	P2RY14	1.39941e-21	1.24093	C15ORF39	1.29359e-31	0.547862	SLC37A4				0.0026597	1.33177
1.12021e-08	0.268008	FOSL2	1.3264e-14	0.741227	ACAA2	2.96914e-10	0.400376	CITED2	8.97008e-11	0.474459	KIR2DL41	2.24701e-17	1.51885	OXLD1	3.73058e-07	0.465342	TIAM1	4.13647e-09	0.371217	GNG2	6.81092e-26	0.740063	IL10RA	4.34335e-28	0.810276	MAN1C1	1.24284e-28	0.98112	TM9SF1	8.16544e-13	0.324549	UBE2L3	5.22806e-09	0.850436	RASEF	2.38604e-37	0.751956	RRAD	1.78025e-21	0.374665	GPBP1	1.41675e-31	0.551497	ATP6AP2				0.0027031	1.95539
1.16982e-08	0.491797	DUSP6	1.35471e-14	0.949078	CTDSP1	3.13473e-10	1.71232	GPR35	9.60801e-11	0.360901	LAMTOR5	2.26167e-17	3.96666	SULT1B1	4.66467e-07	0.451873	RBM39	4.31753e-09	1.53808	FOSB	1.09534e-25	0.803614	DOK2	4.83231e-28	1.16934	RPL36A	3.81064e-28	1.05469	IL10RA	9.31702e-13	0.289106	ATP5O	5.60489e-09	1.24094	GCH1	3.83952e-37	0.957918	PRKCA	1.8417e-21	0.921274	CARD16	1.57747e-31	0.431358	ARL6IP1				0.00271029	1.29622
1.33325e-08	0.399138	PBX4	1.9709e-14	0.911336	PAFAH2	4.23845e-10	0.665638	ESYT2	1.06218e-10	0.264736	ATP5G3	2.54691e-17	1.25665	ITFG2	5.04693e-07	0.963148	IL6R	4.78326e-09	0.456924	SLC9A3R1	1.1086e-25	1.34616	RBKS	5.11041e-28	1.1048	DDX5	4.00907e-28	1.03776	COMMD3	9.40619e-13	0.306057	MIF	6.59743e-09	0.729529	GABARAPL1	5.48225e-37	0.384115	DNAJA1	2.10439e-21	0.280493	GMPR	3.96529e-31	0.538679	EBI3				0.0028214	0.730016
1.41353e-08	0.267463	CST71	2.16982e-14	0.390013	ARPC1B	4.51942e-10	0.56074	BCL2A1	1.09872e-10	0.556424	CASS4	2.58951e-17	0.888087	RNPC3	5.30051e-07	0.486711	ZNF431	7.909e-09	0.285094	RUNX3	1.35577e-25	1.05242	ACOX3	5.14922e-28	1.16312	C4ORF32	1.04616e-27	2.66277	WIPI1	9.53341e-13	0.425378	RPS14	6.85974e-09	0.438908	ZNF780A	5.72399e-37	0.584795	GALNT3	2.8424e-21	1.18719	STXBP2	4.19491e-31	1.51266	MB21D2				0.00284709	0.62827
1.47917e-08	0.855736	ERN1	2.58898e-14	0.282616	HCST	4.75296e-10	0.578935	GPR155	1.16955e-10	0.440193	GALNT12	2.95506e-17	1.00264	RCAN3	5.33593e-07	0.724205	TBC1D2B	9.21612e-09	0.458856	EIF4ENIF1	1.58335e-25	0.642407	TPI1	5.23294e-28	2.26566	NUP88	1.71534e-27	0.475742	TMC8	1.57168e-12	0.454518	ASF1A	8.22046e-09	1.13894	STARD7	6.17494e-37	0.422697	AKAP13	4.34481e-21	0.507308	MGAT4A	4.46772e-31	0.562537	ORMDL2				0.00287556	2.70254
1.59256e-08	0.256043	WDR74	2.89045e-14	0.29427	RPL26	5.54736e-10	0.532609	ME2	1.26175e-10	0.344925	JAML1	2.98065e-17	1.07921	RUNDC3B	8.28167e-07	0.876976	ASB2	9.78639e-09	0.557916	PQLC3	3.72627e-25	0.906712	IKBKE	9.40137e-28	1.08732	GLB1L3	2.00619e-27	9.6303	AMPD1	1.59218e-12	1.71671	AXL	9.19765e-09	1.10018	CD55	6.94332e-37	1.6137	RNF144A	4.60089e-21	1.19458	ARRB2	5.02554e-31	0.260915	GNG10				0.00290013	1.54027
1.86814e-08	0.528427	PLEKHA2	4.45494e-14	0.300552	EEF1G	6.3236e-10	1.09868	LRRN3	1.29504e-10	1.34981	ACSL1	3.14287e-17	0.989476	PTPN6	8.45768e-07	0.800097	INTS6L	1.0275e-08	0.454091	ODF2L	3.73366e-25	0.881676	CHST11	1.04269e-27	1.85068	CHPT1	5.22476e-27	0.665689	GORASP2	1.70123e-12	0.747277	CYC1	9.58173e-09	2.08486	PHLDB1	8.36951e-37	0.634301	SYAP1	4.73488e-21	1.71789	SIRPB2	2.47979e-30	0.358516	LAIR1				0.00292965	1.44383
2.19564e-08	0.574102	HECA	4.81276e-14	0.281815	RPL35	7.00169e-10	0.608594	SLC7A5P2	1.35487e-10	0.399469	HAUS31	3.31638e-17	1.31857	EPB41	8.79997e-07	0.302673	DDX3X	1.13492e-08	1.1811	PERP	4.20964e-25	1.20072	ODF3B	1.52995e-27	2.10281	SP140	5.75404e-27	2.21477	IGFLR1	1.91605e-12	0.700323	PTPN1	1.1553e-08	1.16603	TAGAP	1.08007e-36	0.893936	EGR3	4.78369e-21	0.380164	CD99	2.68186e-30	0.32988	DBI				0.00295144	0.965216
2.33178e-08	0.682394	NUP98	4.89523e-14	0.697893	RNF126	7.32461e-10	0.71054	SNX9	1.60307e-10	0.273507	CD961	4.31473e-17	1.06616	TESPA1	9.01558e-07	0.461643	STK4	1.19123e-08	0.579917	MFSD10	7.03559e-25	0.856847	NOP58	1.60962e-27	1.53963	HIF1A	7.38285e-27	1.11034	SLC39A8	1.98228e-12	0.456031	ENTPD1	1.38175e-08	0.305623	CAST	1.3662e-36	0.888996	FOSL1	5.50245e-21	0.793987	TGFBR1	2.7403e-30	0.262954	CD83				0.00296471	0.712297
2.47879e-08	1.25031	BANP	6.70379e-14	0.352064	SNRPA	7.38423e-10	2.05433	MYO1E	1.78331e-10	0.418142	PRDX3	5.39434e-17	0.776556	SPTBN1	1.11039e-06	0.667287	TGFBR2	1.21957e-08	0.679909	C5ORF56	7.09657e-25	1.02411	MIIP	1.69539e-27	0.888501	RPL18	7.9801e-27	0.966175	SEC23B	2.00708e-12	1.29543	ABCE1	1.4531e-08	0.718896	KIDINS220	1.74016e-36	0.792806	BATF	5.61228e-21	0.34276	LRRC75A-AS1	3.73663e-30	0.612523	PSAP				0.00300926	0.568767
2.68306e-08	0.548458	DEDD2	7.35918e-14	0.534304	UBE2L3	7.77999e-10	0.589463	DZIP3	2.11937e-10	0.442702	CARD16	9.58395e-17	1.76662	RASA4B	1.2092e-06	0.698386	IFRD1	1.24931e-08	0.857462	GCLM	7.1289e-25	1.486	MBOAT7	1.7676e-27	3.59321	PLEKHA2	1.53245e-26	0.671537	ATRAID	2.03733e-12	0.365729	MIF4GD	1.55029e-08	0.726405	MGEA5	2.08951e-36	0.779474	ANKRD37	5.96036e-21	0.923441	TSPO	5.52472e-30	1.07036	GCHFR				0.00303104	1.88664
3.03124e-08	1.30018	TGFB1	7.83422e-14	0.260847	RPL10	9.59837e-10	0.571714	CRY1	2.62094e-10	0.419527	ANAPC11	9.58566e-17	0.374783	MT-CO3	1.22261e-06	1.17376	PLSCR1	1.30477e-08	0.95386	ATP2A3	7.53386e-25	0.510867	ARPC1B	1.77442e-27	1.0932	RPL5	1.55859e-26	2.21653	BCKDK	2.11213e-12	0.568768	MAP4K1	1.57231e-08	1.46788	EPB41L3	2.55675e-36	2.3504	PLAT	6.3831e-21	1.77253	TMEM263	6.11955e-30	0.317346	VAT1				0.00308557	1.07323
3.12857e-08	0.704393	FAM133B	8.39126e-14	0.476183	PPP3CC	1.13811e-09	0.655581	CYSTM1	2.8713e-10	0.278137	TMEM14C1	1.15341e-16	0.415261	MIPOL1	1.35673e-06	1.18832	RGPD8	1.30805e-08	0.398854	PAG1	8.45408e-25	0.802296	HERPUD1	2.24571e-27	1.69763	SMG1	1.9186e-26	2.7692	GLA	2.28277e-12	0.451088	TIMM17B	1.57568e-08	0.486679	VAMP2	2.69627e-36	0.550003	DNAJB9	8.00453e-21	0.66347	TGIF2	6.17512e-30	0.56773	GALM				0.00314896	2.34622
3.39627e-08	0.489353	AP1S3	8.98911e-14	0.28706	RPS18	1.56248e-09	0.521953	MAFF1	3.04873e-10	0.358228	DPP3	1.27582e-16	0.821783	CTC1	1.42897e-06	0.851655	RNF139	1.31912e-08	0.457875	CD63	9.10691e-25	0.810176	GTF3C6	2.50306e-27	1.18639	MYH9	2.0091e-26	5.55943	HIST1H2AE	2.33918e-12	0.7939	P2RY10	1.57833e-08	0.354377	IL17RA	2.93539e-36	0.497951	ABCC1	8.87534e-21	0.794301	PEPD	6.40598e-30	0.894242	VMO1				0.00319186	0.804653
4.40938e-08	0.615582	GRAMD1B	1.20157e-13	0.27288	RPL11	1.57713e-09	1.15406	MLF1	3.43425e-10	0.424437	CSRP1	1.32892e-16	1.01721	FLT3LG	1.47053e-06	0.480025	RHOH	1.32288e-08	0.389573	HMOX2	1.13867e-24	1.15331	NSF	2.6437e-27	2.47609	LINC00869	2.17094e-26	1.93996	SLC1A4	2.49309e-12	0.616889	HSD17B10	1.61394e-08	0.958402	FGD4	3.71603e-36	0.374868	IL4R	1.0258e-20	1.09883	ARHGAP30	8.22167e-30	0.464463	SMS				0.00321403	0.666096
4.4958e-08	0.83333	DENND3	1.23025e-13	0.611437	ICAM2	1.82285e-09	0.494747	TANK	3.56923e-10	0.266056	GGA21	1.5622e-16	1.4264	ABCD2	1.47366e-06	0.566886	TUBA4A	1.45757e-08	0.6582	TANK	1.2323e-24	0.627668	YWHAE	3.2297e-27	2.47682	ARHGAP22	2.20601e-26	0.697638	TMEM214	2.7e-12	0.679257	PXDC1	1.85431e-08	0.30408	PPP2R5C	4.80896e-36	0.319455	TNS1	1.04456e-20	0.63583	NOP58	1.22755e-29	0.440292	HSP90AB1				0.00323952	1.18444
5.23771e-08	0.516735	HLA-DRA	1.35257e-13	0.391281	ARL4C	1.93059e-09	0.355406	LEPROTL11	3.56932e-10	0.328657	PSTPIP1	1.94402e-16	2.20166	CFP	1.61954e-06	1.11968	SLC25A46	1.83013e-08	0.356557	GPR183	1.77715e-24	0.750636	RHOG	3.53094e-27	2.17904	FAM49B	2.22709e-26	1.24632	MGAT2	2.72927e-12	0.262093	RFX5	1.85631e-08	0.399692	HERC1	6.55766e-36	0.986685	ID2	1.40038e-20	1.03139	USP15	1.44354e-29	0.362746	ATP6V0E1				0.00324239	0.312761
5.52235e-08	0.520202	SFPQ	1.52851e-13	0.98423	CISD3	2.08402e-09	1.19441	ZNF609	4.39075e-10	0.372869	SQRDL	1.95156e-16	1.02281	CRBN	1.76423e-06	0.638154	ARHGAP18	1.84472e-08	0.273564	ATP2B1	2.0166e-24	0.695314	ANXA2	3.72638e-27	1.3836	CALM2	5.20181e-26	0.256759	RPS27L	2.77691e-12	0.252666	RPL26	1.99426e-08	2.39306	HES1	8.96854e-36	0.729678	SRSF3	1.41695e-20	1.6998	PELI2	1.66386e-29	0.777868	FRMD4B				0.00344548	1.54311
5.89549e-08	0.424381	ANKRD37	1.67909e-13	0.500296	NFATC3	2.09154e-09	0.402349	PNRC11	4.56723e-10	0.325236	NDUFB6	2.13467e-16	0.922009	TMEM243	1.91947e-06	0.983735	RRN3P1	1.88062e-08	0.359177	GABRE	2.04048e-24	0.844037	UXS1	4.24784e-27	2.46883	MAPRE2	6.44736e-26	1.1887	ARL1	3.19289e-12	0.71759	RGS1	2.10024e-08	0.797556	AKR1B1	1.10846e-35	0.670906	ARHGDIB	1.64653e-20	0.938017	LINC01002	1.83037e-29	1.24964	LINC01094				0.00344577	1.12388
6.55089e-08	0.484646	SPOCK2	2.03635e-13	0.679363	FLI1	2.2896e-09	0.326125	EIF4A31	4.8346e-10	0.377013	DBI	2.19359e-16	0.357934	GAS5	1.91951e-06	1.57204	SLC43A2	2.00691e-08	0.459727	SYNE1	3.88918e-24	2.70828	CLEC7A	5.11139e-27	2.10547	PDE6A	1.07172e-25	3.09007	CEP128	3.7828e-12	0.579272	BAK1	2.12991e-08	0.539523	ATF3	1.14174e-35	0.304359	DENND4A	1.79384e-20	0.568885	RPLP2	2.72209e-29	0.67794	MAFF				0.00348621	1.37095
6.72337e-08	0.276396	SLC24A1	2.39396e-13	0.338734	RPL37A	2.29627e-09	0.446597	PHF20	5.0592e-10	0.350761	SFXN1	2.52287e-16	1.13131	TPP2	1.94492e-06	0.880379	ANKRD37	2.05645e-08	0.294577	SEC61B	4.40476e-24	1.24126	SLC12A6	7.2803e-27	1.99955	KPNA5	1.28326e-25	1.94336	MCEE	4.34534e-12	0.768498	ABHD15	2.18735e-08	1.73585	ARID5A	1.65379e-35	0.775415	SWAP70	1.88581e-20	2.08546	RBP7	4.84059e-29	0.454945	TMEM251				0.00350822	2.612
7.60781e-08	0.5995	FRMD4B	2.56693e-13	1.43873	CBR4	2.37508e-09	0.327844	ELF11	5.36104e-10	0.263134	TMEM14A	2.55522e-16	1.01607	ARHGEF18	1.94762e-06	0.437263	TLK1	2.24772e-08	0.475425	SMURF2	5.24193e-24	1.23301	GRAMD3	7.39554e-27	2.44279	SASH3	1.45277e-25	0.802563	CDK2AP2	4.67556e-12	0.397219	PRCP	2.25487e-08	0.407347	PCDHA4	2.56311e-35	0.349526	STX3	2.98606e-20	0.396192	DNPH1	9.68753e-29	0.550753	CALU				0.00351631	0.804213
8.01959e-08	1.63242	CCR4	3.26622e-13	0.363137	LAT	2.57778e-09	0.343591	DDX24	5.93682e-10	0.367719	GBP2	3.48685e-16	0.941661	SESN3	2.42994e-06	0.486531	BCLAF1	2.3039e-08	0.353881	CAPN2	7.43078e-24	0.850887	POU2F2	7.69196e-27	0.809772	RPL37	1.7088e-25	2.13631	SRM	5.56234e-12	0.252996	POLR2J	2.42634e-08	0.387782	CCT3	2.78524e-35	0.371166	MT-CO1	3.09752e-20	1.14854	KIAA0922	1.08074e-28	0.254383	JUN				0.00355846	1.10371
9.22771e-08	0.552822	TNRC18	3.62112e-13	0.575604	CASP8	2.83071e-09	0.389207	MT-ND6	5.99009e-10	0.501783	HIF1A	3.64698e-16	0.625695	LIME1	2.51781e-06	0.299741	ZC3H12D	2.64383e-08	0.575875	MPP7	1.13819e-23	0.771687	SDF4	1.05784e-26	0.474361	TMEM2	2.27407e-25	0.876889	TMED4	5.69087e-12	1.00278	CD180	2.68241e-08	1.05042	RIPK2	6.29719e-35	0.727383	CDCP1	3.256e-20	0.931537	NADK	1.52004e-28	0.621458	TPD52L2				0.0035869	1.08321
1.00599e-07	0.314359	MPZL3	3.656e-13	0.359602	SELPLG	2.83491e-09	0.258976	RPLP0	6.23961e-10	0.485834	PPT1	4.09263e-16	1.91374	RIC3	2.5204e-06	0.60756	GSPT1	2.80154e-08	0.395465	DRAP1	1.30815e-23	0.988386	LTB	1.53939e-26	0.400223	MALAT1	2.36427e-25	7.07516	WFS1	5.72406e-12	0.856252	PHB	3.2594e-08	1.31176	RAB20	9.26147e-35	0.558415	RASGEF1B	3.95403e-20	1.27133	SMCHD1	1.9374e-28	1.43626	RAB13				0.00359772	0.717075
1.00624e-07	0.349167	F2R	4.20926e-13	0.439914	ARL14EP	3.35037e-09	0.340474	ITM2B	7.56818e-10	0.776944	ATP10D	4.52098e-16	1.82011	BEX2	2.54143e-06	0.38453	ATXN1	3.33943e-08	1.21875	GYG1	1.51471e-23	3.81747	MYO1E	2.94978e-26	5.1245	PLEKHA1	2.70578e-25	1.22881	AARS	6.3693e-12	0.478693	PPA2	3.41818e-08	2.43786	AGAP3	1.0753e-34	0.511454	PDCD4	4.976e-20	0.903655	TRIM22	2.22362e-28	1.05786	PI4K2A				0.00360055	2.21642
1.00895e-07	0.505059	CLDND1	4.5098e-13	0.382999	PTPN6	3.50811e-09	0.282985	USP20	7.59497e-10	0.433903	MPG	4.80876e-16	0.955744	ZNF493	2.66523e-06	0.623737	SS18	3.55748e-08	0.390685	SOS1	1.63702e-23	1.13167	GRSF1	2.97081e-26	0.72724	RPL41	3.69806e-25	2.72024	GADD45A	7.01988e-12	0.420067	TMEM109	3.59319e-08	0.551383	P4HA2	1.0764e-34	0.4591	EEF1A1	5.44316e-20	0.682577	WAS	2.40094e-28	0.420235	TMED10				0.00369466	1.38742
1.02666e-07	0.272119	IL7R	4.89498e-13	0.401178	KIAA1551	3.64713e-09	0.424229	MPC1	7.70326e-10	0.546396	AGFG1	5.46337e-16	1.58	NBPF15	2.77601e-06	0.838346	NDFIP2	3.7365e-08	0.538506	RASSF2	1.7412e-23	0.553172	NAB1	3.11198e-26	3.24487	INPP5F	4.09291e-25	1.42789	CFLAR	7.13136e-12	1.33694	TXN	3.83076e-08	1.06695	LCA5L	1.51001e-34	0.928727	PAQR3	5.73219e-20	1.5186	RAP1GAP2	2.61762e-28	0.403836	GPX4				0.00389049	0.879864
1.27584e-07	0.268328	TBC1D15	5.50943e-13	0.459307	SIT1	4.64422e-09	0.658037	SKAP21	7.80957e-10	0.405575	COX8A	5.46768e-16	1.09191	CENPK	2.81328e-06	1.16858	SRGAP3	3.77049e-08	0.275967	DOCK10	1.94991e-23	0.657921	FOSL2	5.49886e-26	1.49069	SF1	5.25705e-25	1.11393	HYOU1	7.40873e-12	0.317768	RPL29	4.36769e-08	0.376386	PRMT2	1.74359e-34	3.12778	IL5RA	5.98936e-20	0.385394	ANP32E	3.3402e-28	2.51243	LILRB5				0.00390058	0.845415
1.33222e-07	0.815115	KCTD21	5.94175e-13	0.909408	ZBTB44	4.67294e-09	0.547559	TYMP	7.85008e-10	0.388311	PTPN7	5.85121e-16	0.496963	PCSK5	2.92181e-06	0.581388	HLA-L	3.96308e-08	0.448986	APOBEC3G	2.00813e-23	1.09765	IRF5	5.62399e-26	2.5587	ZNF28	8.49452e-25	1.09168	USP48	7.63051e-12	0.386738	YIF1B	4.41238e-08	0.33935	C4ORF32	2.16464e-34	1.05255	LMO4	7.99419e-20	1.3667	2022-09-11	3.38282e-28	0.664887	LPAR6				0.00390071	0.380887
1.34457e-07	0.274335	NCOA2	6.04632e-13	0.42405	ATP5A1	5.79259e-09	0.441767	GLO1	8.03017e-10	0.304059	COPE	9.38426e-16	1.71329	LCLAT1	3.25762e-06	0.416569	DNAJA1	4.35355e-08	0.556604	DEGS1	2.30495e-23	1.8524	CUL9	5.69708e-26	0.782018	RPL8	1.09052e-24	1.2338	PIP5K1B	7.69893e-12	0.889295	DCTPP1	4.6785e-08	0.864523	CXCR4	2.79761e-34	1.2594	SLC26A2	1.0468e-19	1.17227	TLR8	4.04469e-28	0.753319	OTUD1				0.00390433	0.272668
1.46074e-07	0.412445	SLC1A5	6.93625e-13	0.342152	PSMB10	5.81253e-09	1.47747	ADH4	8.47112e-10	0.316737	CRIP1	1.16212e-15	2.88762	FAM153B	3.30912e-06	0.518441	PPP1R2	4.42299e-08	0.933436	TBCD	2.30876e-23	0.739578	SIRPG	9.12694e-26	2.73076	WDFY2	1.25232e-24	0.415818	UQCRQ	7.80973e-12	0.276247	RPL8	4.81465e-08	1.43767	MFSD2A	3.2801e-34	2.88517	ITGA2B	1.27226e-19	0.780666	CAST	4.55742e-28	0.279836	MAFB				0.00399588	0.41458
1.64207e-07	0.681618	NCK2	8.67528e-13	1.0678	MTSS1	6.1062e-09	0.277422	DDX3X1	8.83779e-10	0.456485	IQGAP1	1.38679e-15	1.57915	ANKRD26	3.36385e-06	0.748016	NPIPB3	6.38146e-08	0.719131	GLO1	2.40872e-23	0.888167	ARPP19	9.88046e-26	1.92489	HLA-DOB	1.30117e-24	1.14668	ELL2	8.82432e-12	0.420567	NDUFA7	4.82826e-08	0.95476	RHBDF2	3.39162e-34	0.652384	HSPA2	1.3291e-19	0.326632	IGFLR1	4.68004e-28	0.694688	S100B				0.0040043	2.38841
1.65015e-07	0.669593	PLP2	8.69352e-13	0.778115	ADHFE1	6.3627e-09	0.686902	MPP7	9.95182e-10	0.504892	LRMP	1.6214e-15	1.16407	VAMP2	3.41115e-06	0.541817	EIF4A3	7.18372e-08	0.538006	NR1D2	2.41533e-23	0.560479	ZC3H12A	1.34817e-25	1.16904	SLC9A7	1.43809e-24	1.51562	ALG2	9.95882e-12	2.64432	SPIB	5.10518e-08	0.97994	NDRG1	3.41888e-34	0.449748	JUN	1.96721e-19	0.273361	MDH1	5.27622e-28	0.926005	MGLL				0.00401798	0.777962
2.20659e-07	0.425164	ODC1	9.06951e-13	0.866655	RASSF7	6.39452e-09	1.26646	ZNF571	1.19973e-09	2.23535	ITGA2	1.74265e-15	1.2749	CISH	3.42877e-06	0.611019	TMEM243	7.45788e-08	2.1933	MATK	3.35894e-23	0.873658	CST7	1.47469e-25	1.23752	HNRNPA1	1.82155e-24	2.39724	LAX1	1.02859e-11	0.443418	EEF1G	5.63495e-08	3.21777	TGM2	3.47307e-34	0.559041	IER2	2.11013e-19	0.745274	NFAM1	5.39325e-28	0.599523	STAB1				0.00403822	0.791453
2.36961e-07	0.79476	ZRANB1	1.08053e-12	0.337775	TRPV2	6.69656e-09	0.582195	NMUR11	1.26747e-09	0.49535	SHMT2	1.86557e-15	1.01529	TNRC6C	3.49672e-06	0.481625	SMG1P3	7.50015e-08	2.34885	CLU	3.39597e-23	0.556675	ACTN4	1.54158e-25	1.30475	PCSK5	2.30405e-24	0.527585	PSENEN	1.19343e-11	0.359469	ARPC3	6.85114e-08	1.63543	JOSD1	4.43746e-34	0.486553	STMN1	2.71067e-19	1.58968	YPEL2	5.57467e-28	0.808295	SLAMF7				0.00414626	1.51264
2.45383e-07	0.607547	PRKX	1.18397e-12	0.773198	CDC16	6.75947e-09	0.561527	MED29	1.26883e-09	0.307493	NDUFA13	1.98975e-15	0.256587	FGF23	3.67528e-06	0.714926	RNF138	8.52652e-08	0.702646	CASP10	3.60671e-23	0.616187	ITGB1	1.88832e-25	1.98883	MYL12B	5.91396e-24	0.851336	COMMD3-BMI1	1.28193e-11	0.414523	HNRNPA1	8.21593e-08	2.68774	EIF2AK3	4.77074e-34	0.366149	NFKBIZ	2.86719e-19	1.05642	PTPN6	5.59748e-28	0.834513	DNASE2				0.00422143	0.751331
2.51416e-07	0.667278	HLA-DQB1	1.27926e-12	0.509047	KCNAB2	6.96619e-09	0.675011	CXCR6	1.30955e-09	0.268709	TFRC	2.05649e-15	1.27403	SDR39U1	3.92816e-06	0.386065	CIRBP	9.71747e-08	0.301688	MYH9	3.77076e-23	0.659934	CD82	2.6855e-25	3.49938	PRKCE	7.90999e-24	0.822273	PRDX2	1.30436e-11	0.653213	LDHA	8.37792e-08	0.718247	UBXN4	1.72167e-33	1.87384	ITK	3.00844e-19	0.821321	GNAI2	5.72565e-28	0.614189	KIF1B				0.00422874	0.483885
2.51461e-07	0.327896	IDS	1.45369e-12	0.757153	LINC01138	8.07005e-09	0.601931	CPD	1.34704e-09	0.471248	OSER1	2.82912e-15	0.625181	BTF3	4.30286e-06	0.706967	NCDN	9.92663e-08	1.64783	PRF1	3.81472e-23	0.755257	HNRNPLL	2.97776e-25	2.15935	PROSER3	1.12507e-23	1.16444	CASP3	1.32129e-11	0.349585	HINT2	8.62664e-08	0.328896	UPF2	2.20277e-33	0.40638	SRSF2	3.74727e-19	1.7156	NCF1	6.69303e-28	0.65586	SGPP1				0.00424116	3.05001
2.72153e-07	0.268151	SNHG16	1.45468e-12	0.433872	UTRN	9.09973e-09	0.308145	ODC11	1.59749e-09	0.268921	UBE2L6	4.18865e-15	1.26027	MAML2	4.31822e-06	0.445068	ISG20L2	1.12083e-07	1.87783	ZDHHC2	4.31463e-23	1.12688	DAPP1	3.66356e-25	2.94772	GNB5	1.12846e-23	1.54919	ODF3B	1.53167e-11	0.304585	PSMA6	8.69316e-08	1.2952	BCL3	3.24735e-33	0.60139	BZW1	3.85816e-19	1.00498	DMXL2	8.89948e-28	0.822592	EGR1				0.00428684	1.14742
2.83784e-07	1.81546	LHFPL2	1.46982e-12	0.304287	YWHAB	1.04711e-08	1.24331	LAT2	1.60671e-09	1.18981	MAST4	4.27512e-15	1.53249	TOM1L2	4.57403e-06	0.427219	ATF7IP	1.23636e-07	0.299374	NFATC3	4.55039e-23	2.22131	MZB1	4.237e-25	1.97315	2022-09-07	1.22172e-23	6.57162	TNFRSF4	1.5446e-11	0.615592	TRADD	9.41855e-08	0.518766	ARHGEF39	3.32525e-33	1.09828	CD38	4.35842e-19	1.03167	ACAP2	9.031e-28	0.959694	WDR74				0.00429684	5.35977
2.92355e-07	0.570124	CCSER2	1.47511e-12	0.486096	NLRP1	1.1042e-08	0.262916	IL2RB	1.66627e-09	0.294398	HSP90AB11	4.43547e-15	0.511096	GUSBP2	5.05478e-06	0.666337	TRIM13	1.24436e-07	1.15434	RHBDF2	4.55497e-23	0.566789	VCP	4.47026e-25	1.48283	NAP1L1	1.33173e-23	1.06923	ANXA2	1.73419e-11	0.29684	RPS15	1.02021e-07	0.867397	MMP9	3.53349e-33	1.63789	LINC00987	4.48908e-19	0.511985	TYROBP	9.79101e-28	0.254195	SLC43A3				0.00429782	0.440541
3.0873e-07	0.436971	TRA2B	1.49351e-12	1.03936	NCR3	1.17738e-08	0.536138	RLF	1.8111e-09	0.799746	APOBEC3D	4.83518e-15	1.30326	CHMP7	5.50958e-06	0.499421	CBLB	1.51543e-07	0.501582	DNAJC1	5.94452e-23	0.748544	HDAC7	4.94869e-25	1.20592	RPS7	1.67958e-23	1.51028	BIK	1.88561e-11	0.4481	NDUFA12	1.04005e-07	0.647296	PCDHGA8	3.54169e-33	0.445362	GNPTAB	4.91328e-19	0.291382	OAT	1.62285e-27	0.565335	HMOX1				0.0043247	1.27268
3.13629e-07	0.46673	TTC39B	1.86267e-12	0.406306	NDUFB9	1.35406e-08	0.418286	RNF1391	1.81644e-09	0.348567	ITGB11	4.99581e-15	1.13303	EGLN2	6.17735e-06	0.484944	SFPQ	1.6239e-07	0.409195	TNFSF8	7.30539e-23	1.13608	IL15RA	5.17635e-25	2.1346	CCND3	2.05244e-23	0.495089	EIF2AK4	1.89952e-11	0.38546	LYRM4	1.13464e-07	0.466753	LCORL	5.02296e-33	0.470738	NBAS	5.64159e-19	0.454066	TNFRSF1B	1.90567e-27	0.424877	PRDX3				0.00433407	1.96922
3.16899e-07	0.327685	DDX27	2.02245e-12	0.718228	YPEL1	1.39588e-08	0.841533	TMEM14C	1.87129e-09	0.276751	REEP5	5.49362e-15	1.21449	ZNF101	6.22414e-06	0.685552	ODC1	1.70616e-07	0.284527	CANX	1.32787e-22	1.12263	ISOC1	5.198e-25	2.87652	FAM53B	3.29919e-23	1.75282	CSRP1	1.94466e-11	0.782359	AKR7A2	1.28191e-07	1.23692	NCOR2	7.33787e-33	0.453545	DDX5	5.9165e-19	0.466737	DENND4B	1.99152e-27	0.634731	PDXK				0.00439115	0.362254
3.18224e-07	0.47382	REEP2	2.2117e-12	1.0139	SLC15A4	1.53513e-08	1.30647	HPGD	2.00314e-09	0.289679	ZFYVE28	6.29035e-15	1.12115	POLR2J2	6.32229e-06	0.452433	PELI1	1.77498e-07	0.419932	CLUHP3	1.44363e-22	0.992044	PICALM	6.42454e-25	1.9404	IL24	4.23953e-23	1.06793	NDUFB7	2.473e-11	0.290641	TMEM243	1.43171e-07	1.38137	ERN1	1.65927e-32	0.5052	SLC44A1	5.95463e-19	0.851649	CD302	2.04344e-27	0.315293	HSPE1				0.00443737	2.77933
3.21754e-07	0.30546	GAS5	2.25995e-12	0.424164	BTN3A3	1.60329e-08	0.311667	VIM	2.11243e-09	0.402626	GBP11	6.58131e-15	0.730293	GLG1	6.81057e-06	0.598868	NUP98	2.12092e-07	1.90144	KIAA0825	1.71918e-22	0.669703	SFT2D1	8.9532e-25	1.68639	PPP1R16B	4.42754e-23	4.85134	JSRP1	2.59671e-11	0.289815	PSMA7	1.43862e-07	1.52463	WWP2	2.77128e-32	1.91989	TIE1	8.87529e-19	1.1395	RNF213	2.64867e-27	0.420642	MYO1E				0.00449386	0.805735
3.21898e-07	0.628116	TP53BP2	2.50847e-12	0.277237	ARHGEF2	1.6538e-08	0.436911	PPP3CA	2.16463e-09	1.76674	CLNK	6.79855e-15	1.27755	TNFAIP8L2	7.04055e-06	0.49804	PNRC1	2.18495e-07	0.772637	AOAH	1.76418e-22	1.49536	ST6GALNAC4	9.50399e-25	2.11906	ZNF493	4.61393e-23	0.740084	WDR45	2.61673e-11	0.365096	PSME1	1.49114e-07	0.481349	KMT5B	2.95786e-32	0.264089	KMT2E	8.94561e-19	1.18442	2022-12-01	2.92805e-27	0.441627	FCER1G				0.00456294	0.47933
3.36816e-07	0.617365	BORCS5	2.74185e-12	0.360251	ZNF215	1.7066e-08	0.477476	PTPN61	2.21942e-09	0.35818	ASNA1	6.86692e-15	1.05542	BBS2	7.16771e-06	0.283805	CALM2	2.2317e-07	0.274848	TLN1	2.04897e-22	0.625887	NINJ2	9.6354e-25	2.38431	SMC6	5.41152e-23	1.15156	NEU1	2.89169e-11	0.875501	IL18BP	1.55045e-07	1.19304	DHX34	3.54906e-32	0.567857	G3BP2	9.40342e-19	0.433466	DNAJC3	3.26487e-27	0.312863	TMBIM6				0.00467131	1.52001
3.69192e-07	0.35831	KAT6A	2.75448e-12	0.513928	ORMDL1	1.80758e-08	0.875609	CENPBD1P1	2.39909e-09	0.273932	HSD17B10	7.99778e-15	1.02612	STAT6	7.19312e-06	0.436339	CIB1	2.40375e-07	0.440763	HERPUD2	2.06415e-22	0.706654	PSMB8	9.68817e-25	2.49179	C2CD3	5.64164e-23	0.518474	DTNB	3.16702e-11	0.265783	COX6C	1.56538e-07	1.15161	ZMIZ1	5.19963e-32	0.482314	MYLIP	1.1645e-18	0.499689	HEXB	8.17546e-27	0.383412	SLC39A1				0.00470309	1.64314
3.69704e-07	0.566638	SLC25A4	3.21851e-12	0.759228	GIMAP2	1.85407e-08	0.841441	MROH1	2.41243e-09	0.709756	SGK11	9.05154e-15	1.12593	TNRC6B	7.31529e-06	0.574015	EIF1B	2.40459e-07	0.370017	IDH2	2.87576e-22	1.33942	FCRL3	1.0331e-24	4.13326	BCL2A1	8.44409e-23	0.46006	MAGED2	3.18255e-11	0.583421	PSMB1	1.62555e-07	1.11028	EIF4A3	5.2124e-32	0.291488	SLC39A11	1.19024e-18	0.578498	TNFSF10	9.97873e-27	0.601936	RCAN1				0.0048313	1.17714
3.82219e-07	0.679791	KCNK6	3.35801e-12	0.282192	RPS7	1.9467e-08	0.30229	RDH13	2.45876e-09	0.314874	ATP6V0E2	9.42271e-15	1.1065	ZNF276	7.41699e-06	0.32829	LAMTOR2	2.82858e-07	0.640734	GALC	2.93219e-22	0.330695	HLA-B	1.13005e-24	1.75993	TBC1D10C	1.39613e-22	1.4277	STX11	3.25857e-11	0.568218	SNRPD1	1.63527e-07	1.40398	JMJD1C	5.58256e-32	0.501127	MRPS6	1.39222e-18	1.18006	ARHGAP4	1.00429e-26	0.38935	LAP3				0.0048635	2.40007
4.10218e-07	0.93842	EHD4	4.07813e-12	0.28529	SP110	1.9961e-08	0.579729	GADD45B1	2.49701e-09	0.534732	MRPL12	1.04114e-14	0.886826	BIN1	7.64705e-06	0.469055	SLC3A2	2.97184e-07	0.369446	CCDC85B	3.05399e-22	0.796766	CAST	1.13085e-24	2.11178	GGA2	1.69163e-22	3.74083	ZNF215	3.26771e-11	0.447601	RPS13	1.73101e-07	2.11174	PPARD	8.64506e-32	1.09531	SLC10A7	1.60648e-18	1.2744	CKAP4	1.0051e-26	0.669858	S100A11				0.00489141	2.26703
4.63728e-07	0.55127	CAMK1D	4.25354e-12	0.506295	WASF2	2.00312e-08	0.345033	BIRC31	2.70424e-09	0.30327	THEMIS	1.08307e-14	1.42737	TRMT13	7.67038e-06	0.682613	CTSB	2.975e-07	0.341391	TRAM1	3.13977e-22	0.856977	CDK6	1.27445e-24	0.439478	FRK	1.79603e-22	0.919359	PSMB5	3.5073e-11	0.580086	RNF139	1.75991e-07	1.11589	NBEAL2	9.12099e-32	2.41294	TNFRSF9	1.64541e-18	0.962623	TNFSF13B	1.26087e-26	0.879968	PLIN2				0.00489757	1.10108
4.68123e-07	0.262724	HLA-DRB1	4.47844e-12	0.648055	MAD1L1	2.72902e-08	0.680493	H1FX	2.77265e-09	0.322298	UTS21	1.16743e-14	0.264102	TMSB10	8.05374e-06	0.598766	SYPL1	3.11425e-07	0.953992	TPD52	3.25852e-22	1.12438	TTC7A	1.75478e-24	0.533187	ZBTB8B	2.06896e-22	1.21714	MRPL36	3.87775e-11	0.590371	SAMHD1	2.05003e-07	1.03698	PRRG3	1.19301e-31	1.09997	TTC39B	1.79745e-18	0.845883	TNK2	1.2872e-26	0.400235	NEU1				0.00491202	1.53268
5.54553e-07	0.654954	SRRT	5.44236e-12	0.533553	MED15	2.79455e-08	0.732585	KCTD9	2.88246e-09	1.13677	RFX7	1.47444e-14	0.944602	TMEM71	8.12731e-06	0.508371	DOCK11	3.1365e-07	0.957889	KLF10	3.53621e-22	1.29204	CD59	1.82033e-24	3.14193	TTC39C	2.43934e-22	1.2254	TMEM184B	4.21332e-11	0.538495	ITGB7	2.12363e-07	1.73264	OASL	1.30478e-31	0.470207	CD44	2.20617e-18	1.2477	RNPC3	1.77359e-26	1.28898	SIGLEC12				0.0049332	2.00051
5.69984e-07	0.691129	ADGRE2	5.75174e-12	0.597247	C1ORF174	2.80197e-08	1.34386	NUGGC	3.03316e-09	0.326776	SLC25A5	1.5437e-14	0.931273	PSIP1	8.23456e-06	0.62536	RLF	3.6149e-07	1.60726	SPON2	3.59076e-22	0.789771	FAM173A	2.66897e-24	2.15352	MX2	2.68972e-22	0.804218	SDF4	4.47989e-11	0.657323	HERPUD1	2.32187e-07	0.492015	NDUFA13	1.37102e-31	2.55708	CCDC141	2.20895e-18	1.32758	SCLT1	1.8142e-26	0.507266	PALD1				0.00495252	0.975391
5.84887e-07	0.774375	B3GNT2	6.31771e-12	0.609974	MRFAP1L1	3.02065e-08	0.358908	LPIN1	3.60062e-09	0.25041	TRAT11	1.71837e-14	1.24514	ZNF91	8.25584e-06	0.684612	UAP1	4.30016e-07	0.62078	CERK	4.09291e-22	0.598379	FOXN3	2.734e-24	0.749593	TMEM154	2.79273e-22	0.547284	SRP54	4.77189e-11	0.587647	TMEM184B	2.37721e-07	0.417559	ZFP36	1.60389e-31	0.577083	LAPTM5	2.25744e-18	0.271804	CUTA	2.28861e-26	0.546935	TM2D2				0.0049846	2.03367
6.10715e-07	0.62207	USP53	6.52937e-12	0.699107	DENND4B	3.90663e-08	0.370843	ETF1	4.51621e-09	1.65614	PTPRK	1.84861e-14	0.991358	NBPF9	8.47852e-06	0.273332	HIST1H4C	4.45415e-07	0.694688	ADGRE2	4.21938e-22	0.867778	KAT2B	2.95309e-24	1.68348	ZNF737	3.17122e-22	1.81386	CKAP4	4.9568e-11	0.568115	AIM1	2.38615e-07	2.56943	TWISTNB	1.67262e-31	0.451287	HNRNPC	2.37419e-18	1.95095	ASGR1	2.59172e-26	0.499864	RAP2B				0.0050083	1.30448
6.17844e-07	0.436213	CDK16	7.42945e-12	0.402376	DIP2A	3.98082e-08	0.265662	SAT11	4.54893e-09	0.284718	NDUFA11	1.97868e-14	0.907411	KCNA3	8.52797e-06	0.403704	CLEC2D	4.99342e-07	0.770132	EPHA4	4.58949e-22	0.949763	MAN1A2	3.09291e-24	2.94362	RASSF2	3.27218e-22	5.79234	BLOC1S5-TXNDC5	5.2504e-11	0.30346	ATP5L	2.43028e-07	1.79558	PHLDA2	1.94557e-31	0.893816	PEBP1	2.56939e-18	1.04286	THEMIS2	4.31939e-26	0.854461	ACOT13				0.00513383	0.923
6.4886e-07	0.419682	ICOS	7.53803e-12	0.292118	C9ORF142	4.25012e-08	0.686101	RCAN3	4.86933e-09	0.487921	EED	2.4617e-14	0.410312	RASGRF2	9.67412e-06	0.352466	CCNL1	5.46696e-07	0.770427	IFI44	4.76683e-22	0.618887	STK17B	3.28748e-24	2.8632	ZEB2	3.32391e-22	2.89401	HYI	6.02381e-11	0.368908	LSM7	2.5615e-07	1.44974	N4BP1	1.98245e-31	0.499915	DDIT3	3.05182e-18	1.24016	JAK2	4.43437e-26	0.54576	PDIA6				0.00517994	1.09977
6.97276e-07	0.333635	INSIG1	7.99566e-12	0.431186	CALCOCO1	4.32722e-08	0.391461	NFKB21	5.148e-09	0.269991	GPRIN3	2.49325e-14	0.996185	BCL11B	1.01425e-05	0.38445	HIPK1	5.66195e-07	0.702866	TMEM184B	4.90484e-22	0.665347	UCP2	3.46307e-24	2.16091	MPV17L	3.4946e-22	1.27339	PREB	6.52235e-11	0.346127	IGSF6	2.58221e-07	1.78655	NECTIN2	2.00059e-31	0.591518	VAPA	3.32332e-18	1.38331	HHEX	4.49947e-26	0.582398	ARMCX1				0.00518446	1.66911
8.19159e-07	0.25849	NDEL1	8.28564e-12	0.620152	AXIN1	4.52413e-08	0.478655	CBLB	5.35407e-09	0.897272	HLA-DQB21	2.78264e-14	0.96707	TGFBR2	1.0269e-05	0.459394	CCDC59	5.68962e-07	4.36726	NHSL2	4.92413e-22	0.559122	HLA-H	4.17886e-24	1.80797	PSIP1	4.35009e-22	1.54833	POU2AF1	7.23525e-11	0.509495	RAB11FIP1	2.80863e-07	1.7392	TNS4	2.21918e-31	1.00983	NFATC1	3.36841e-18	0.911351	STK10	5.01758e-26	0.37562	ATP5G3				0.00551537	1.42665
8.28219e-07	0.592269	JMJD1C	1.22372e-11	0.283507	VAMP2	5.56553e-08	0.380751	PPCS	5.75422e-09	0.398225	CASP3	2.79703e-14	0.513639	PTPN4	1.07451e-05	0.585705	TFRC	5.9946e-07	0.385765	LIME1	5.03313e-22	0.80511	ANKRD10	4.45109e-24	0.817843	ABCA9	5.94384e-22	1.06906	FCGRT	7.34692e-11	0.542127	PON2	2.83544e-07	0.338787	SBK1	3.20049e-31	3.28561	ZNF704	3.54404e-18	0.742238	TBC1D10C	5.04256e-26	0.492424	PPIB				0.00557633	1.04012
8.3368e-07	1.08711	PLAUR	1.40137e-11	0.275063	RPS4X	8.32933e-08	0.593137	CCDC50	6.21137e-09	0.336497	EMC7	3.40379e-14	0.912118	LENG8	1.07562e-05	0.332156	RSRC2	6.1986e-07	0.380494	ATP1A1	5.24554e-22	0.733499	NOP10	4.71629e-24	0.419497	SLC35F2	6.91811e-22	0.355323	SEC63	7.49278e-11	0.42621	SP140	2.85031e-07	1.70331	B3GNT5	3.61196e-31	0.666576	PRDX1	3.85026e-18	1.06662	PRKCB	7.32515e-26	0.858165	TNF				0.00575254	1.1542
8.45804e-07	0.590019	ASAP1	1.49386e-11	0.541771	CD84	8.52072e-08	0.499495	DDX211	6.44373e-09	0.386901	PPM1G	3.59584e-14	1.08926	OXR1	1.10823e-05	0.481518	ANKRD12	6.31616e-07	0.383516	NLRC3	5.6157e-22	0.474039	H3F3A	6.00003e-24	3.9025	ANK3	7.19806e-22	4.88512	B9D1	7.76385e-11	0.540876	FH	3.33366e-07	0.426341	CHTF8	3.61485e-31	0.688435	DDX3X	4.19526e-18	0.747099	LRRFIP1	9.00162e-26	0.437093	THBD				0.00586899	1.44272
8.93199e-07	0.317893	SMAP2	1.50018e-11	0.935747	SLC25A20	9.84946e-08	0.294265	NUCB2	6.51017e-09	0.399906	RHOC1	4.32713e-14	1.5203	LINC00957	1.13043e-05	0.497676	SMG1P1	6.5177e-07	0.281886	SIGIRR	5.652e-22	0.828891	PTPN1	6.11799e-24	3.62085	HHEX	7.337e-22	0.651237	RAPGEF2	8.79433e-11	0.685607	DPYSL2	3.66357e-07	1.96289	RBKS	5.13454e-31	0.726876	PTP4A1	6.26334e-18	1.18861	FKBP15	1.09266e-25	0.333847	SDC4				0.00596768	1.25506
9.60369e-07	0.552096	SAFB2	1.55098e-11	0.338445	ARPC5	9.87201e-08	0.401155	SPDYA	6.62297e-09	0.315009	NAP1L4	4.47233e-14	1.24276	CDC42SE1	1.3432e-05	0.336044	SPOCK2	6.9093e-07	0.454393	GIMAP6	5.71343e-22	0.649493	TULP4	6.77989e-24	4.65798	STAG3	7.74952e-22	0.938304	ATF3	9.18259e-11	0.453015	DCXR	4.4629e-07	0.383584	PPP2R5A	5.69709e-31	0.433838	EHD1	6.39491e-18	0.899407	LAMTOR4	1.57318e-25	0.859447	GIMAP5				0.00599796	0.28696
9.77269e-07	0.470846	ITM2C	1.8112e-11	0.950117	KLRC4	1.07296e-07	0.253996	PRKAR1A	7.73893e-09	0.471834	MAD2L2	5.97512e-14	1.21784	GCNT4	1.40565e-05	0.471528	SF1	6.98661e-07	0.337527	TXNIP	5.93541e-22	3.64148	METTL7A	9.0514e-24	0.427268	ST8SIA5	9.09563e-22	2.48327	PECAM1	9.2843e-11	1.29009	NME4	4.50531e-07	1.39038	ADAM8	5.90718e-31	0.910624	CLCN3	6.5668e-18	0.760885	MEF2C	2.73424e-25	0.519064	TUBA1C				0.00602737	0.370805
1.07732e-06	0.352501	KANSL2	1.92261e-11	0.697563	MDM4	1.1122e-07	0.494342	POLR2L	8.84558e-09	0.468679	ATP6V0B	7.10493e-14	1.06797	AAK1	1.41699e-05	0.50629	PLIN2	8.46221e-07	0.793636	AHR	7.42795e-22	0.773629	PRDM2	9.17588e-24	1.74777	ARHGEF1	1.00714e-21	0.575123	TPD52	9.70416e-11	0.673328	COTL1	4.60351e-07	1.10399	LPXN	7.98168e-31	0.563471	RPL3	7.27802e-18	0.764608	SPI1	3.18703e-25	0.30854	DOCK1				0.00616642	0.78286
1.08717e-06	0.690397	PLA2G4C	2.03711e-11	0.927827	TMEM63A	1.2412e-07	0.430006	CHCHD10	8.9657e-09	0.707026	NME1	7.22469e-14	0.740448	BIN2	1.45967e-05	1.24076	CTTN	9.1535e-07	0.303709	RBM3	1.09274e-21	1.06396	EED	9.27576e-24	1.14564	PVRIG	1.12058e-21	0.717879	DPP7	1.01868e-10	0.331001	RPL11	4.72391e-07	0.499411	RNF187	9.27778e-31	0.385011	CKS2	8.44426e-18	1.36262	NAAA	4.8284e-25	1.19264	HSPH1				0.00624335	1.59749
1.09865e-06	0.409296	NDRG1	2.47863e-11	0.598287	HPS1	1.28267e-07	0.394359	C20ORF24	9.10419e-09	2.08024	LMCD1	9.22245e-14	0.858687	NPAT	1.4744e-05	0.531485	SPTLC3	1.00005e-06	0.280559	IDS	1.17026e-21	0.296929	IRF4	9.5081e-24	1.88472	SHISA9	1.27409e-21	1.79889	MAGEH1	1.11234e-10	0.540406	EIF3M	5.03353e-07	0.460093	DEDD2	9.3274e-31	0.568564	OSBPL8	9.05518e-18	0.892035	RNF149	5.09758e-25	0.352442	C3				0.00644704	2.39197
1.3063e-06	0.434567	ELOVL5	3.93184e-11	0.392621	ARPC4	1.71528e-07	0.257152	ZFP36L1	9.89885e-09	0.263142	SOD1	9.24324e-14	1.11412	RABL2B	1.49544e-05	0.412708	VAPA	1.0402e-06	0.326651	FLI1	1.23772e-21	0.824544	PMVK	9.93801e-24	2.32291	LYL1	1.44707e-21	0.344561	S100A11	1.19429e-10	0.342868	SEC13	5.4362e-07	0.332013	EYA1	1.37853e-30	0.512699	STK4	9.55207e-18	0.752632	USP9X	5.33091e-25	0.990906	ZNF267				0.00652844	0.523597
1.39015e-06	0.505177	CHD2	5.04223e-11	0.375026	ANXA2	1.82223e-07	0.405294	TSC22D31	1.04795e-08	0.433712	SLC3A21	9.75314e-14	1.55571	SH2D3A	1.49696e-05	0.731696	POMT1	1.16049e-06	0.74714	MAP3K13	1.46672e-21	0.769282	SLC5A3	1.08679e-23	3.02734	CYP3A5	1.66949e-21	0.410469	DERL2	1.48511e-10	0.920006	IL4I1	5.76779e-07	0.966505	DOCK4	1.49577e-30	0.560931	MAT2A	1.02701e-17	1.25499	CCM2	7.27231e-25	0.641634	TOR3A				0.00657496	1.63498
1.4519e-06	0.494938	SLC9A7	5.12813e-11	0.552086	CHST12	1.92712e-07	0.377675	ALG131	1.10262e-08	0.960192	RSAD2	1.21914e-13	1.28368	SPDYE1	1.56962e-05	0.984358	FAM53C	1.16936e-06	0.294554	UFM1	1.62284e-21	1.60643	LINC01619	1.09877e-23	1.48687	BTF3	1.73891e-21	0.982508	OST4	1.50603e-10	0.395925	C15ORF48	6.47862e-07	0.791434	NFKBIZ	1.54323e-30	1.55067	KRT19	1.06918e-17	0.511094	CPVL	8.00931e-25	0.968697	FILIP1L				0.00658009	2.20575
1.47749e-06	0.250013	PNPLA8	5.30469e-11	0.328673	DYRK2	2.07205e-07	0.676546	EGR21	1.19121e-08	0.351358	MTHFD21	1.33743e-13	0.388998	MT-ND2	1.62615e-05	0.253615	ZAP70	1.19812e-06	0.495176	LAIR1	1.8963e-21	0.609007	PAM	1.24299e-23	1.7609	COMMD6	2.09889e-21	1.46623	PIM1	1.51472e-10	0.386619	ASNA1	6.77884e-07	0.912335	MOB3B	3.21899e-30	0.779846	SERINC1	1.08488e-17	1.97021	GIMAP1	9.40479e-25	0.383434	PPT1				0.00670407	2.02831
1.48381e-06	0.760223	SIK1	5.35161e-11	0.401042	SLC44A2	2.1366e-07	0.495772	SSBP4	1.31575e-08	0.284599	SRI	1.48569e-13	1.53293	APBB1	2.04663e-05	0.59785	HBP1	1.20254e-06	1.95807	CCL20	2.27386e-21	1.08346	GNPTAB	1.28273e-23	0.74526	FRRS1L	2.3227e-21	0.26828	NOMO2	1.60729e-10	1.17518	SLC35F2	7.17245e-07	0.268875	CACNA1A	4.20066e-30	0.544747	HERC1	1.12028e-17	0.920452	NBPF20	1.88701e-24	0.36881	LRPAP1				0.0067863	0.549059
1.51697e-06	0.355812	CYP51A1	6.09675e-11	0.518676	SCP2	2.15131e-07	0.394365	NFE2L21	1.51293e-08	0.315745	CHST11	1.64534e-13	1.96666	OSER1-AS1	2.09765e-05	0.661323	POLR3E	1.2215e-06	0.727662	MID1IP1	2.72087e-21	0.518858	CD28	1.47724e-23	3.55866	QRSL1	2.39353e-21	0.97315	ATP5G1	1.74089e-10	0.619418	SNX3	8.28245e-07	0.529418	ARNTL	4.94278e-30	0.774123	HSPA1B	1.13374e-17	1.19217	DST	2.10194e-24	0.456822	TUBB				0.00682868	2.26999
1.59869e-06	0.476316	SFI1	6.11009e-11	0.299995	PRR13	2.21029e-07	0.727209	REPS1	1.57345e-08	1.51863	CSGALNACT1	1.81706e-13	1.10448	GIGYF1	2.37459e-05	0.73826	BIRC2	1.24815e-06	0.566396	CCR6	2.82491e-21	1.21884	LDLRAD4	1.79808e-23	2.38311	2022-03-03	3.36666e-21	0.503794	NDFIP1	1.79716e-10	0.767274	KLLN	8.52252e-07	0.259532	ORAOV1	5.44955e-30	0.530416	GSE1	1.27072e-17	0.795963	PILRA	2.24754e-24	0.399194	EEPD1				0.00687149	1.23253
1.66043e-06	0.411206	NASP	7.51025e-11	0.804269	ENPP4	2.22453e-07	0.630402	PSD4	1.62101e-08	0.377562	PSMB2	1.85466e-13	0.766999	SPDYE5	2.40435e-05	0.323434	RIF1	1.47033e-06	0.445199	CDC37	3.58181e-21	0.787095	HN1	2.00377e-23	1.56125	PKD1L2	3.54306e-21	1.16373	DNAJB1	2.09007e-10	0.420509	TNNI2	9.04133e-07	0.590683	ARL5A	5.73899e-30	0.250417	NEDD9	1.34664e-17	1.48758	TCHP	2.99671e-24	0.484437	NEK6				0.00690042	1.15213
1.77083e-06	0.552633	RLIM	7.92946e-11	0.869468	TRMT13	2.6642e-07	0.337494	PHYKPL	1.64094e-08	1.69122	WIPF3	1.93422e-13	1.60951	THOC3	2.52445e-05	0.593471	CEBPZ	1.83025e-06	0.968004	DUSP5	5.18674e-21	0.934391	NDFIP2	2.39078e-23	1.07719	PARP8	3.90328e-21	1.38964	ZFP36	2.17921e-10	0.399005	NUTF2	9.10973e-07	0.375693	TPT1	7.91158e-30	0.73769	ZNF597	1.55565e-17	1.48186	GIMAP2	3.01723e-24	0.550903	ITM2B				0.0069007	1.02883
1.78734e-06	0.285971	KLF6	8.35208e-11	0.446028	CCDC88C	2.74674e-07	0.64793	GALNT6	1.70139e-08	0.753173	SPIN1	2.28631e-13	1.66751	FCGRT	2.57397e-05	0.486658	PDK3	2.10622e-06	0.666726	ZBTB44	5.48187e-21	0.630644	GNA15	2.4951e-23	4.54386	FCER2	6.35793e-21	0.953878	NDUFB11	2.20319e-10	0.458716	NFATC2	9.45282e-07	1.46512	ECE1	8.54291e-30	0.49818	EIF1	1.57851e-17	0.860362	IQSEC1	4.44206e-24	1.55011	SPIRE1				0.00690138	0.788528
1.85463e-06	0.44959	ARF4	9.55008e-11	0.459968	PILRB	2.80783e-07	0.378137	RGS10	1.94988e-08	0.302164	EGR22	2.42808e-13	0.728683	PATJ	2.57951e-05	0.741916	PPP1CC	2.1171e-06	0.597361	CFAP97	5.80706e-21	0.954789	MALT1	2.73984e-23	2.39619	AIM1	6.89355e-21	1.97498	SLC7A5	2.21317e-10	0.610711	SRP19	9.69903e-07	1.11003	MGAT1	8.99646e-30	0.95662	ISYNA1	1.6261e-17	0.281237	PRMT1	5.08106e-24	0.31184	FMNL3				0.00691692	0.6863
1.85701e-06	0.319285	RASA31	1.108e-10	0.699619	PLCB2	3.10571e-07	0.386258	PIK3AP1	1.95343e-08	1.40303	GPD2	2.45589e-13	0.859092	AP1G2	2.77437e-05	1.27448	PCNX2	2.14057e-06	0.457147	CMPK1	6.65216e-21	0.544346	GBP4	3.07772e-23	5.30368	GPR18	6.92449e-21	1.47753	YIPF2	2.24628e-10	0.498353	CYCS	1.02471e-06	1.49248	MIR4435-2HG	9.22722e-30	0.325213	TEC	1.89874e-17	0.736517	RPS24	5.56859e-24	0.289592	CYP27A1				0.00700653	1.48583
1.92088e-06	0.438238	SLC20A1	1.12334e-10	1.24116	MAST3	3.32962e-07	0.539806	PIM3	2.08254e-08	0.282312	JAKMIP11	2.5338e-13	1.30565	B4GALNT2	2.89855e-05	1.09746	AOAH	2.3292e-06	3.40429	CX3CR1	7.40843e-21	0.858947	SNX10	3.14057e-23	2.459	CHD1	7.1075e-21	0.775912	ATP5A1	2.29514e-10	0.395288	DDOST	1.13889e-06	1.82308	STAT4	1.63926e-29	0.832574	ANTXR2	2.24837e-17	0.916882	HSH2D	6.07424e-24	0.652731	AMPD3				0.00705065	3.64916
1.96148e-06	0.465701	BEST1	1.43528e-10	0.26054	CTSC	3.34677e-07	0.267978	NAP1L1	2.16437e-08	0.691123	MCM6	2.59377e-13	1.23579	SLC8B1	3.13357e-05	0.663251	SMARCA5	2.61542e-06	0.263975	CD53	7.73781e-21	1.47183	SPATS2L	3.14378e-23	2.93969	ZNF318	7.18213e-21	1.9588	FGL2	2.37562e-10	2.44557	C12ORF75	1.14789e-06	1.15306	FFAR2	1.74374e-29	0.92017	ABHD2	2.24959e-17	0.628835	KLF2	6.72214e-24	0.382492	CD209				0.00709012	1.15295
2.02195e-06	0.325819	FAM122C	1.71773e-10	0.510405	VPS29	3.3629e-07	0.273925	RORA	2.24739e-08	0.573833	YIF1B	2.61252e-13	1.363	ZNF141	3.18333e-05	0.552127	LIMS3	2.64055e-06	0.615404	SPTY2D1	9.95416e-21	0.789781	RBPJ	3.79789e-23	1.56113	ZNF891	8.95251e-21	1.28967	R3HDM2	2.39546e-10	0.669613	OPN3	1.27819e-06	1.34973	NFKBID	2.63628e-29	0.579526	TOB1	2.31003e-17	0.60901	ZBTB7B	1.09312e-23	0.476845	POMP				0.00716425	1.8767
2.09501e-06	0.310073	ASPA	1.82417e-10	1.02446	SH3BP2	3.45176e-07	0.629254	DUSP16	2.27157e-08	0.522275	DGKH	2.8022e-13	0.866946	S1PR4	3.25119e-05	0.998104	DBF4B	2.97683e-06	0.437397	SLFN12L	1.01704e-20	0.698892	C4ORF48	3.80375e-23	2.8895	NLRC5	1.18806e-20	0.84112	GANAB	2.46417e-10	0.588543	SPCS1	1.32002e-06	1.32459	FADS6	3.69787e-29	0.297813	MATR3	3.34561e-17	0.995806	PPP1R9B	1.29161e-23	0.445935	TBC1D4				0.00729389	0.912093
2.10736e-06	0.454363	PALM	1.84534e-10	0.592769	ARHGEF18	3.56829e-07	0.292789	DOCK9	2.52734e-08	0.982399	TRPS11	2.89249e-13	0.632983	SLC25A6	3.32907e-05	0.751067	YTHDC2	2.97835e-06	0.471355	RNF166	1.02804e-20	0.420593	TMSB10	4.32365e-23	1.00052	LINC01551	1.50285e-20	0.388388	HEXB	2.63988e-10	0.254684	HNRNPLL	1.46853e-06	1.92479	CDC123	3.73746e-29	0.544665	C16ORF54	3.40133e-17	0.816912	GRK6	1.67425e-23	0.746567	ADM				0.00732222	0.86216
2.20773e-06	0.586496	STRC	1.87204e-10	0.464138	GLRX	3.88805e-07	0.576412	DCTN6	2.65981e-08	0.280431	NR3C11	3.25438e-13	0.315509	IL7R	3.44168e-05	0.545133	IDS	3.2698e-06	1.25594	ZNF652	1.13733e-20	0.885669	STAMBPL1	4.64704e-23	3.06204	FANCD2	1.86062e-20	1.50645	NENF	2.74475e-10	0.337484	RANBP1	1.69992e-06	0.791912	TMX4	3.89395e-29	0.940642	RBMX	3.52012e-17	2.0594	FAM198B	1.73503e-23	0.713995	IFI6				0.00734773	1.78282
2.26176e-06	0.429191	ASTE1	2.01899e-10	0.312315	SRP9	4.09061e-07	0.326705	2022-06-01	2.75635e-08	0.300055	PSMB101	3.32578e-13	1.20864	PILRB	3.59407e-05	0.951942	CCL4	3.51946e-06	0.659688	HELZ	1.29692e-20	0.693349	SURF4	5.07211e-23	2.68459	RHOG	2.25166e-20	1.12284	PYGB	2.77522e-10	0.995809	C1ORF54	1.88263e-06	1.19285	RPUSD4	3.97559e-29	0.41441	DNAJB14	3.68729e-17	1.07177	ARGLU1	1.75864e-23	0.873672	FCGR2B				0.00736867	0.65192
2.27943e-06	0.286024	CARMN	2.14816e-10	0.656834	SDAD1	4.30871e-07	0.305129	ABRACL	3.1062e-08	0.287739	UBE2A	3.42618e-13	0.989574	RPL23AP82	3.66407e-05	0.390185	MAGEH1	3.59833e-06	0.589084	HIPK1	1.37366e-20	0.606079	FKBP1A	5.19467e-23	0.891859	SLC4A7	2.29381e-20	3.09067	PDIA5	2.81527e-10	0.643696	ZBTB10	1.98669e-06	0.256059	AKAP9	4.11513e-29	0.523886	NFE2L3	3.69165e-17	0.963293	ADAP1	2.22615e-23	0.457208	RASGEF1B				0.00751889	1.23663
2.52801e-06	0.553718	NXT1	2.17605e-10	1.14338	GEMIN7	4.35532e-07	0.685142	PDLIM7	3.64369e-08	0.404776	TRIM59	4.22115e-13	0.332713	FRK	3.68908e-05	0.642781	CCDC6	3.62026e-06	0.487023	MAP4K5	1.8043e-20	0.944228	KDM5B	5.39033e-23	2.96288	ARHGAP9	2.34353e-20	0.76573	SLC3A2	2.88858e-10	0.405119	GLO1	2.06709e-06	0.945942	ADAM19	4.17697e-29	2.06711	PRELID2	3.94714e-17	0.903548	CREB3L2	2.96377e-23	0.422755	RHEB				0.00753609	0.516092
2.57624e-06	0.408503	NR1D2	2.61135e-10	0.585857	TRIM21	4.91778e-07	0.757298	MMP251	3.9271e-08	0.663484	FDFT1	4.37114e-13	0.826278	FGD3	3.81107e-05	0.36637	SOS1	3.66051e-06	0.256614	SLC39A8	1.97638e-20	0.691452	NUDT5	5.7387e-23	0.999171	HSD17B2	2.44464e-20	1.50063	GLRX	2.97686e-10	0.572538	N4BP2L1	2.11806e-06	1.31896	XPA	4.71019e-29	0.27712	SRSF7	4.25802e-17	0.531979	HLA-C	3.00287e-23	0.264593	CD4				0.00755816	0.491768
2.7878e-06	0.675861	MCOLN2	2.80197e-10	0.472556	TSC22D4	5.45122e-07	0.490326	BCAS4	4.16668e-08	0.257021	SUB1	6.08665e-13	0.840592	ZBED5	3.87356e-05	0.448092	SIRPG	3.67795e-06	0.579135	ADCY7	2.27604e-20	0.609477	CAPN2	7.59645e-23	2.77682	RABEP2	2.57e-20	0.371976	IER3IP1	3.20639e-10	0.302113	H3F3AP4	2.22632e-06	1.44188	SRC	5.52162e-29	1.01616	TNFSF10	4.31842e-17	0.767103	AP1S2	5.55669e-23	0.46806	ST3GAL6				0.00757596	1.96098
2.87163e-06	0.315323	NELL2	3.02399e-10	0.474215	TRANK1	5.5138e-07	0.344732	SLC31A1	4.31295e-08	0.295902	MRPL36	6.48701e-13	1.16133	OBSCN	4.05333e-05	2.81061	POU2AF1	4.16404e-06	1.40839	GZMB	2.46397e-20	0.608068	SELPLG	9.0345e-23	2.76999	MACF1	2.87991e-20	1.07602	C1GALT1C1	3.27233e-10	0.334339	MDH2	2.24784e-06	1.81409	SLC39A8	7.34596e-29	0.402256	TSTD1	5.77455e-17	1.16975	TLR2	5.68681e-23	0.369442	ARPIN				0.0075846	0.990467
3.01079e-06	1.29471	MCM9	3.66972e-10	0.2728	PIM1	5.59745e-07	0.295724	MICAL1	4.58211e-08	0.346363	YARS	7.47238e-13	1.27831	ALKBH7	4.08272e-05	0.73654	CRTAM	4.18392e-06	0.430024	CHD9	2.60853e-20	0.803394	RDX	1.0787e-22	0.574149	PHLDB1	4.31996e-20	2.31288	PSAT1	3.53976e-10	0.322804	PSMA5	2.26971e-06	1.36855	VPS9D1	7.37785e-29	0.77872	IFITM10	5.97898e-17	1.16238	DPYD	8.21904e-23	0.726657	AVPI1				0.00759794	2.78589
3.04079e-06	0.28098	PTP4A1	3.84039e-10	0.54006	GZMM	5.68805e-07	0.343915	GABRG2	4.73949e-08	0.792886	HSPA1A1	8.26136e-13	0.684381	LITAF	4.67011e-05	0.966791	AP3M2	4.64189e-06	0.380952	SERP1	2.64957e-20	0.713456	SAMSN1	1.21959e-22	1.6138	DNASE1	4.65479e-20	1.40349	ITM2A	4.46241e-10	0.512403	CNN2	2.29705e-06	1.3253	LINC01239	8.94383e-29	0.557664	SMAD3	6.24243e-17	0.693097	CECR1	1.34716e-22	0.316537	P2RY6				0.00760407	1.71862
3.10658e-06	0.578679	KIAA1683	4.44955e-10	0.679684	ELP3	5.82224e-07	0.552487	METTL9	5.20109e-08	0.737841	ST6GALNAC4	8.32456e-13	1.21741	MAPKAPK5-AS1	4.94698e-05	0.759756	THADA	4.64246e-06	0.370332	PTP4A2	3.80706e-20	0.981242	PEA15	1.33874e-22	4.52353	CD1C	4.73804e-20	0.649901	ADIPOR1	4.94786e-10	1.46961	SDHAF3	2.32716e-06	0.598158	AQR	1.0657e-28	0.488683	GBE1	6.79212e-17	1.28484	LILRA6	1.41143e-22	0.59009	SLC17A5				0.00760609	0.713316
3.21638e-06	0.376835	COTL1	4.96737e-10	0.844797	NSUN5P1	6.05134e-07	0.284221	NCL	5.75693e-08	0.617999	TSPAN5	8.58828e-13	1.23653	SSBP2	4.99903e-05	0.774587	GCNT4	5.40423e-06	0.537964	ZNF276	3.85525e-20	2.26948	ZBED2	1.60389e-22	3.05716	RBM38	5.41787e-20	2.31911	RNU12	5.11254e-10	0.395385	TMEM14B	2.35676e-06	0.740929	ERP44	1.33366e-28	0.753928	USP11	6.99351e-17	1.33826	ITGA4	1.82925e-22	0.379775	LAPTM5				0.0076232	0.804411
3.32059e-06	0.38769	DNTTIP2	5.21796e-10	1.28053	NUAK2	6.39565e-07	0.598001	ABCC1	5.96898e-08	0.280254	PARVG	8.63848e-13	0.925376	SLFN5	5.05722e-05	0.434566	CD84	5.59775e-06	0.991544	AKT3	4.31455e-20	0.625634	CISD2	1.62867e-22	1.13318	RNF180	6.38362e-20	0.650957	SLC9A3R1	5.34989e-10	1.00302	CHST12	2.39151e-06	1.26051	MEFV	1.37105e-28	0.464304	UNC13D	7.28127e-17	1.58758	AKAP10	3.2366e-22	0.517534	STOM				0.00762936	0.543036
3.42499e-06	0.923768	ELN	5.42375e-10	0.803773	TCHP	6.8547e-07	0.493278	TRIM28	6.16232e-08	0.640226	PPDPF	8.78375e-13	0.807911	CYTH4	5.1056e-05	1.64144	SGPP2	5.85379e-06	0.928759	PATL2	4.58134e-20	0.670197	PSMB6	1.80724e-22	2.53855	EXOSC3	8.3234e-20	0.775693	ANAPC11	6.06537e-10	1.59072	GPR157	2.45908e-06	0.631968	NUDCD3	1.38985e-28	0.351847	PLK3	8.99697e-17	1.10214	STK17B	3.37713e-22	0.449103	BEX3				0.00769056	1.74393
4.00117e-06	0.646731	SENP7	5.63239e-10	0.455219	TNIK	7.14895e-07	0.382843	MTFP11	6.35285e-08	0.273538	DCXR	9.13383e-13	1.0526	DENND5A	5.37379e-05	0.472524	GLB1L	6.02699e-06	0.328359	SLC20A1	6.90166e-20	1.73367	NPTN	1.93552e-22	1.30212	SLC1A6	8.83517e-20	1.01015	VOPP1	6.66534e-10	0.878144	ENPP2	2.51984e-06	0.739743	SFTPB	1.62626e-28	0.495448	CLIC1	1.17477e-16	0.368865	BTN2A2	4.29688e-22	1.20776	PAPSS1				0.00777717	1.33528
4.39462e-06	0.437748	TCP1	6.01052e-10	0.475085	LY9	7.46759e-07	0.446982	SDF4	6.397e-08	0.665035	CPNE2	1.24324e-12	0.958198	MRPS18B	5.92905e-05	0.805821	TOPORS	6.06531e-06	0.340242	MGST3	8.68506e-20	0.771337	BARD1	3.32784e-22	0.999761	RPS24	9.34461e-20	0.599741	LARP1B	6.88744e-10	0.6394	NDUFA8	2.56121e-06	0.421826	ACTR10	1.77024e-28	0.841751	CHD7	1.17836e-16	1.82619	IPCEF1	4.64712e-22	0.44512	B2M				0.00780763	0.703862
4.52871e-06	0.252791	ZNF574	6.33366e-10	0.904586	PRR4	7.59441e-07	0.369685	PLK31	6.48259e-08	0.295381	CLEC2D	1.30035e-12	0.957611	LBH	6.39034e-05	0.487879	MPP7	6.07186e-06	0.696726	RAB29	9.77528e-20	0.647225	OPTN	3.37782e-22	0.779889	ALDH7A1	9.35204e-20	0.550611	PQBP1	1.09473e-09	0.740554	RNF2	2.60611e-06	0.458419	NUB1	2.27161e-28	0.268981	NOP58	1.28278e-16	0.522623	H3F3A	4.83304e-22	0.924341	FNIP2				0.007909	0.934699
4.66918e-06	0.596579	MAN2A1	6.33748e-10	1.5431	CYB561	7.92172e-07	1.21703	MZB1	7.09617e-08	0.449497	CHIC2	1.3817e-12	1.45557	IFNGR2	6.49499e-05	0.757261	PCBP3	6.21125e-06	0.606233	PLEKHF1	1.02315e-19	0.402513	SEC24A	3.45258e-22	2.17163	GMIP	9.99556e-20	1.06524	UBA5	1.10595e-09	0.285835	CLEC4A	2.65801e-06	0.890155	WISP2	2.33044e-28	2.75203	IKZF3	1.44984e-16	1.11774	DENND1A	5.01702e-22	0.438528	CTTNBP2NL				0.00799638	0.583603
4.69215e-06	0.379558	GALNT11	6.98481e-10	0.986584	LY75	7.99428e-07	0.3515	PRDX5	7.40675e-08	0.345771	CCT8	1.54813e-12	1.04977	TTC14	6.67166e-05	0.793393	TOM1	6.52998e-06	0.274298	GNAI3	1.04357e-19	0.698452	OAS3	4.26745e-22	2.26202	P2RX5	1.28008e-19	2.61944	NT5DC2	1.14681e-09	0.278566	TOMM22	2.7732e-06	1.06677	NPFFR1	2.74976e-28	0.860473	RGS2	1.48573e-16	1.1876	LRRC25	6.60386e-22	1.05946	CKS2				0.00799735	0.479868
4.69418e-06	0.273636	RBM39	7.70807e-10	0.388146	RPS21	8.13499e-07	0.48139	FASLG	7.51333e-08	0.285972	IRF41	1.63219e-12	0.26682	PDE11A	7.28425e-05	1.81367	FRMD4A	6.80976e-06	0.264875	STK26	1.29464e-19	1.08981	C3AR1	4.89697e-22	2.85072	CARD11	1.43675e-19	0.293689	SPINK2	1.21938e-09	0.306211	RPL30	2.80459e-06	0.586455	IRS2	5.41054e-28	1.38177	DHRS9	1.55342e-16	0.779666	DAPP1	7.72292e-22	0.423922	TUBB2A				0.00829658	0.984994
4.96024e-06	0.3844	C16ORF72	8.17863e-10	0.397889	NDUFA12	8.5736e-07	0.673296	PPIAL4E	7.5824e-08	0.302969	FAM127A	1.6543e-12	0.741123	PNN	7.48776e-05	0.507099	ZBTB1	7.12169e-06	0.738417	ORAI1	1.4123e-19	0.529775	RAC1	5.34754e-22	1.54076	RPL22	1.58012e-19	1.90633	PDXK	1.24392e-09	0.288134	PPP1CA	2.84436e-06	0.445106	CSF2RA	6.40221e-28	0.31148	JMJD6	1.65583e-16	0.879464	TFPT	8.02844e-22	0.500791	PTCH2				0.00834648	1.30786
5.00997e-06	0.430072	CLIC2	8.48259e-10	0.339158	TMBIM4	8.74933e-07	0.763732	GNL3	7.67701e-08	0.318164	DUSP23	1.66654e-12	1.27129	ANKZF1	7.59094e-05	0.538964	RNASET2	7.31783e-06	0.967127	FURIN	1.56387e-19	0.863245	PBX4	5.72308e-22	1.21926	LINC00273	2.31222e-19	0.844401	PSMB6	1.55815e-09	0.440021	CD4	3.10071e-06	0.729293	RAF1	1.13964e-27	0.88211	HOXB2	1.78364e-16	2.1173	RAB27A	9.08105e-22	0.254257	IFNAR1				0.00835484	1.70591
5.16018e-06	0.363285	MAT2A	8.65754e-10	0.397306	C14ORF2	8.90554e-07	0.503655	ICAM11	7.89574e-08	0.309969	C20ORF241	1.69115e-12	0.451486	NDFIP1	7.63444e-05	0.305761	BRCC3	8.076e-06	0.515953	RAP2B	2.04274e-19	2.33495	HACD1	5.7974e-22	0.757936	RPS21	2.40239e-19	0.48855	ATF4	1.57105e-09	0.990827	DHTKD1	3.17524e-06	1.40856	MIR22HG	1.23772e-27	1.87715	MYO16	2.06725e-16	0.911115	PYCARD	9.42578e-22	0.321033	TUBB4B				0.00836516	0.719045
5.23013e-06	0.502521	MIAT	8.72783e-10	0.691974	HDDC2	8.96587e-07	0.901085	LETM2	8.1273e-08	0.3382	ATP5J	2.14616e-12	0.885444	SUSD3	8.3363e-05	0.705544	TNIK	8.12604e-06	0.545186	CTDSP1	2.24745e-19	0.829697	REL	6.05972e-22	5.39448	LYSMD2	2.82814e-19	1.40219	HSPB1	1.66303e-09	0.798534	PSMD14	3.18538e-06	1.14706	PTCH2	1.52419e-27	0.613097	PRKX	3.02874e-16	0.878421	ESYT1	9.50303e-22	0.41741	TUBA1B				0.00842984	1.44772
5.38276e-06	0.346132	RBM8A	8.87742e-10	0.736645	SGSH	9.06458e-07	0.690396	AKAP5	8.1466e-08	0.695871	UBE2F1	2.17247e-12	1.56083	TARBP1	8.83989e-05	0.354516	PRPF38B	8.1649e-06	0.320025	MYC	2.46083e-19	0.611883	SCAND1	7.16791e-22	1.86123	PTPN3	3.15205e-19	1.48407	ANKRD37	1.68261e-09	0.276278	MED30	3.31182e-06	0.549002	ZNF20	2.89402e-27	0.5561	BRAF	3.22933e-16	0.839088	BRI3	9.64911e-22	0.518137	PLA2G15				0.00849377	0.716715
5.75045e-06	0.396754	B4GALT1	9.02295e-10	0.257299	CORO1A	9.67996e-07	0.45782	SVIP	8.17075e-08	0.471893	PFDN2	3.49822e-12	1.16679	KIAA0922	8.9637e-05	0.859101	NUP58	9.1564e-06	1.09716	RCBTB2	2.78073e-19	0.744741	BRE	8.8368e-22	3.2341	ZNF43	3.43131e-19	0.763248	ALG3	1.70286e-09	0.81983	SNAP29	3.36342e-06	0.485237	FXYD3	3.13372e-27	1.77119	TNFRSF18	3.25079e-16	0.250524	SLC39A10	1.05268e-21	0.614983	RASAL2				0.00864333	2.46858
5.97559e-06	0.457801	TMEM43	9.35209e-10	0.461306	XPA	1.04421e-06	0.459221	PRDM21	8.41761e-08	0.780161	RAPGEF1	3.62847e-12	0.964714	KRI1	9.00127e-05	0.513532	MOB4	9.86897e-06	1.27046	ADGRG1	2.8768e-19	0.539294	PHF19	9.173e-22	2.37317	ARID4B	3.45707e-19	3.24347	IFI27L1	1.74017e-09	0.515923	HNRNPF	3.49763e-06	0.749098	ZBTB38	3.57716e-27	0.769297	HSP90B1	3.37284e-16	0.318206	RAB34	1.10943e-21	0.740551	RHOB				0.00868543	0.32147
6.15185e-06	0.791901	HIST2H2AA4	9.60801e-10	0.556638	RNF166	1.10948e-06	0.463668	STX16	8.82674e-08	0.370262	MRPL13	4.30325e-12	0.878915	CATIP	9.61737e-05	0.435205	RIC1	1.02392e-05	0.653825	TRPV2	3.19523e-19	0.523334	ZNF292	1.09192e-21	1.38175	TXNIP	3.64381e-19	1.66643	ALDH18A1	1.85156e-09	1.67314	ITM2C	3.622e-06	0.788569	IL6R	3.84754e-27	1.50351	ABCB8	3.93821e-16	0.28531	APEX1	1.26252e-21	1.66502	STON2				0.00876203	1.0601
6.22463e-06	0.875103	AP3M2	9.73173e-10	0.645238	CATIP	1.11521e-06	0.30487	PRKCH	8.99708e-08	0.325265	SIT11	4.39196e-12	1.47256	FXN	9.73247e-05	0.479823	PRPS1	1.10755e-05	0.660963	LIX1L	3.34653e-19	1.51057	IRAK2	1.12325e-21	3.96944	ZNF566	3.73445e-19	0.351029	C11ORF80	2.008e-09	0.351675	RSL1D1	3.8414e-06	1.30078	MX2	3.92267e-27	1.94993	SOX13	4.23022e-16	1.68066	GAS7	1.32347e-21	1.65868	ACVRL1				0.00883244	2.31235
6.28985e-06	0.550217	PTPRZ1	9.84359e-10	1.01428	TCEAL8	1.15812e-06	1.84186	HECW2	9.14174e-08	0.481476	DZIP31	4.54167e-12	2.06933	NBPF1	9.98385e-05	1.11687	ST8SIA1	1.10968e-05	0.451786	NCOA7	3.4017e-19	0.768744	ISG15	1.34082e-21	1.80222	DOCK8	3.75086e-19	1.34698	PLD3	2.0833e-09	0.812285	RPE	4.14265e-06	0.604585	MALT1	4.58082e-27	0.683843	ATP8B4	4.33186e-16	0.714527	FRMD4A	3.22198e-21	0.499612	LEKR1				0.008838	1.53191
6.87358e-06	0.424213	MAPK1IP1L	1.03844e-09	0.400606	PPP2R5C	1.20994e-06	0.558673	SPINT2	9.3702e-08	0.308442	SUMO1	4.58506e-12	0.855102	GCC2	0.000101963	0.265061	ATXN7	1.18339e-05	0.356275	ANXA5	3.81955e-19	0.68421	PSMA2	1.45397e-21	2.66823	RAB4B	3.779e-19	0.618153	CALCOCO1	2.28696e-09	0.375917	PSMB8	4.22638e-06	1.63442	HMGN2P46	4.93158e-27	2.68875	ITGAV	4.3778e-16	0.365413	PHF21A	3.9607e-21	0.940531	FGD5				0.00884344	1.49893
7.26042e-06	0.431061	TRAPPC10	1.08806e-09	0.712239	MRPL16	1.30623e-06	0.329611	UBE2S1	1.0727e-07	0.279732	ITK	4.73082e-12	2.092	IL24	0.00010442	0.865243	SNAPC1	1.18924e-05	0.263528	STAT1	4.3206e-19	1.41163	BEX3	1.61026e-21	2.63065	FAM102A	3.94767e-19	0.764755	GLCCI1	2.52852e-09	0.54985	PRPS2	4.26815e-06	0.435979	TSEN15	7.10688e-27	0.398777	PMP22	4.40084e-16	1.30865	PSTPIP1	4.14732e-21	0.251353	CALR				0.00886527	0.73914
7.65441e-06	0.376919	WSB1	1.14294e-09	0.60885	STAG3L3	1.31051e-06	0.768191	CCDC92	1.09478e-07	0.857953	ZMIZ11	4.81738e-12	0.771429	EIF3F	0.000104523	0.484864	LINC01578	1.20345e-05	1.50149	USP28	4.3336e-19	0.742432	AGTRAP	1.61984e-21	0.712838	MIR663AHG	4.24492e-19	0.594212	EMC7	2.5622e-09	0.398738	CKLF	4.34774e-06	0.586139	ADAMTS4	1.29137e-26	0.86417	ARMCX3	4.6932e-16	1.60378	MSL3	4.41803e-21	0.369883	NAGA				0.00887078	1.8966
7.73694e-06	0.31238	TXLNG	1.21939e-09	0.46109	SRPK2	1.33023e-06	0.763708	EIF2D	1.10607e-07	0.257437	PTPRA	4.86745e-12	2.0644	SULT1A1	0.000105816	0.757741	RAB30	1.35443e-05	0.577106	RMDN3	4.43386e-19	0.964943	HIVEP1	2.04018e-21	2.98042	PIGB	4.28471e-19	0.598019	FOSB	2.56543e-09	0.251522	EIF3L	4.85404e-06	0.633351	CTSB	1.4611e-26	0.311319	EIF4A2	5.12104e-16	0.443486	PACSIN2	4.95952e-21	2.07905	AIFM2				0.00888601	0.717479
8.24264e-06	0.683297	TLCD2	1.24211e-09	0.436747	SPDYE1	1.4429e-06	0.892606	GFOD1	1.13576e-07	0.459868	INTS6L	4.92697e-12	0.903851	TMEM192	0.00010924	0.288506	DMWD	1.37768e-05	1.54697	PRKY	5.70917e-19	1.1648	NINJ1	2.30931e-21	1.92702	BCL7A	4.32955e-19	0.25977	MRPL40	2.65766e-09	0.687508	SLC1A4	4.91295e-06	0.662352	2022-03-06	1.57586e-26	0.390531	RLF	5.30544e-16	0.768256	MERTK	5.00092e-21	0.584391	AMZ2P1				0.00902006	0.600571
8.24496e-06	0.452816	GLCCI1	1.35062e-09	0.440433	AGTRAP	1.46206e-06	0.289738	MAT2A1	1.24587e-07	0.52703	SREBF2	5.03801e-12	0.503243	SORL1	0.000110241	0.542778	RBPJ	1.49188e-05	1.08209	ZBTB16	7.09948e-19	0.54454	PSMB3	2.32568e-21	2.50705	PHTF2	5.09959e-19	0.718819	NUCB1	2.8017e-09	1.28881	LAMP3	4.99759e-06	0.275393	CNOT6L	2.84005e-26	0.746349	PLEKHF2	5.31853e-16	1.97966	APOL3	1.27954e-20	0.393035	STMN1				0.00902543	0.384183
9.05246e-06	0.38644	RNF139	1.37801e-09	0.462204	SRSF1	1.50319e-06	0.430676	SLC25A39	1.26152e-07	0.3208	NOP581	5.49018e-12	1.01968	CASP8AP2	0.000112791	0.419987	AP4B1	1.60855e-05	1.40291	PLAUR	7.86776e-19	0.488328	RYBP	2.55612e-21	2.04638	USP24	5.69677e-19	0.926205	BTG2	3.23138e-09	0.35771	RPL31	5.06395e-06	0.268221	PDCD4	3.19151e-26	0.428515	WBP2	6.6409e-16	0.628238	ALS2	1.65099e-20	0.644393	CLEC11A				0.00904379	2.40009
9.48347e-06	0.397147	GNE	1.40341e-09	0.481916	SPSB3	1.73999e-06	0.314659	ELL21	1.3458e-07	0.446569	TGIF1	5.7314e-12	1.10949	ZNF248	0.000113087	0.929589	CXORF40A	1.68979e-05	0.556196	SIGMAR1	8.18705e-19	0.816899	KIF20B	4.29564e-21	2.60269	PNRC2	6.48273e-19	0.540122	NDUFA1	3.91378e-09	0.663604	SLC20A1	5.10132e-06	1.40978	SRRM4	3.21096e-26	0.634419	NEU1	6.78418e-16	0.590251	ZEB2	2.13275e-20	0.854972	CANX				0.00912908	0.89223
9.54685e-06	0.378617	UBE2B	1.41219e-09	0.325409	YWHAQ	1.76341e-06	0.291169	EIF5AL1	1.63097e-07	0.360745	NDUFC2	6.81843e-12	1.34185	ACSL6	0.000115499	0.743726	VOPP1	1.8287e-05	0.676855	MAP7D1	9.01447e-19	0.512639	PPP1CA	4.63779e-21	0.564317	MT-ATP6	6.64397e-19	0.359058	THEMIS2	4.1405e-09	0.437286	SET	5.76577e-06	1.58069	SCUBE3	4.21815e-26	1.68142	CD200R1	7.39375e-16	0.560412	MGST2	2.82023e-20	0.877305	SMIM20				0.00922006	0.254508
9.58997e-06	0.422898	N4BP1	1.44191e-09	0.681807	MIB2	1.94318e-06	1.82917	SETD7	1.77201e-07	0.273865	NDUFS8	7.36269e-12	0.868746	SPINT2	0.000120351	0.768102	C9ORF16	2.00433e-05	0.264368	UBXN11	9.62291e-19	0.501111	PSMC2	4.67744e-21	1.39772	C12ORF50	6.92138e-19	0.309932	RER1	4.32445e-09	0.383077	EEF1A1	5.84503e-06	1.06861	EAF1	5.99035e-26	0.531379	CIRBP	7.76781e-16	2.00553	CD1D	3.00791e-20	0.699326	ZNF331				0.00934542	0.874102
9.62398e-06	0.310988	H2AFZ	1.59252e-09	0.479125	ZNF493	2.00454e-06	0.300066	ARHGAP18	1.87374e-07	0.652281	AGO21	7.69245e-12	1.11401	C2ORF68	0.000124622	2.14678	BCAT1	2.15776e-05	0.408242	SYTL3	9.66122e-19	0.813193	CSGALNACT2	6.18418e-21	1.26478	TMEM212	7.87623e-19	0.552806	NDUFS8	4.3311e-09	0.351584	TIMM23	5.98547e-06	0.7078	FPR1	7.73297e-26	0.89854	SRSF6	8.04037e-16	0.609488	PDXDC1	3.23391e-20	0.619967	SERPINF1				0.00935668	1.59055
1.0083e-05	0.4047	SPAG1	1.79421e-09	0.548507	PSMD4	2.20061e-06	0.462218	AMY2B	1.90568e-07	0.26388	MSN	8.4414e-12	0.719495	EIF3H	0.000126057	0.581882	STX5	2.16065e-05	0.538738	IMPDH1	9.81108e-19	0.543506	RNF187	6.50875e-21	0.69997	RPL10	7.93494e-19	0.849177	PDIA3	4.35864e-09	0.423079	POLR2E	6.55609e-06	0.877986	SNHG15	1.00371e-25	0.599452	ZNRF1	8.30511e-16	2.39507	PADI4	3.25702e-20	0.452067	LGALS1				0.0093864	2.11147
1.04341e-05	0.805719	NUFIP2	1.7958e-09	0.75133	COMMD3	2.20969e-06	0.25686	EZR1	2.05382e-07	1.93949	CAMK1	9.36076e-12	1.2276	KIAA1586	0.000138961	1.53181	KIAA1671	2.27894e-05	0.316498	RAPGEF1	1.01812e-18	1.0951	ATOX1	7.99219e-21	3.34373	PRDM4	8.10987e-19	3.3995	IQGAP2	4.66313e-09	0.502833	TPI1	6.78113e-06	0.525019	VAMP3	1.21645e-25	0.386333	SRSF5	1.02616e-15	1.2734	F13A1	5.13874e-20	0.637753	MRPL17				0.00947487	1.05798
1.04632e-05	0.578572	HDAC4	1.82396e-09	1.45937	ZNF641	2.27168e-06	0.334325	PPP1R16B1	2.19327e-07	0.534133	SLC25A46	9.70839e-12	1.15781	ARL17A	0.000145335	0.565123	AMD1	2.34706e-05	0.982417	AMPD2	1.22417e-18	0.800536	USP15	8.76851e-21	1.55783	SMAD3	8.43281e-19	0.594804	DPM2	4.67142e-09	0.371121	RPL27A	7.3668e-06	0.741469	PSMD1	1.2532e-25	0.641074	COPA	1.26627e-15	0.804139	FMNL1	5.15334e-20	0.366968	ASAH1				0.00966515	1.70093
1.04909e-05	0.926689	SHH	2.06007e-09	0.404016	N4BP2L2	2.27788e-06	0.324563	YBX1	2.48635e-07	0.45444	HDLBP	1.01682e-11	1.08956	HCG27	0.000150433	0.36103	MRFAP1	2.41157e-05	0.315285	ST3GAL1	1.9837e-18	0.625194	PBXIP1	9.04955e-21	2.53303	FMO5	8.48334e-19	0.860179	SOX13	4.95893e-09	0.54131	GADD45GIP1	7.65813e-06	1.28302	ATP1A1	1.84717e-25	0.283992	TUBB4B	1.27677e-15	0.803835	CD52	5.34357e-20	1.16901	MRAS				0.00973489	0.909828
1.05728e-05	0.446724	LINC01205	2.31326e-09	0.350483	TCF7	2.29955e-06	0.287661	TANC2	2.51192e-07	0.271866	FAM96A1	1.06118e-11	2.30491	KLF7	0.00015057	1.321	NRP1	2.58677e-05	0.269256	ARF6	3.996e-18	0.839759	BAK1	9.07196e-21	2.13054	CSK	9.60856e-19	1.72025	CPT1C	5.17233e-09	0.325455	MYL12B	7.73214e-06	0.667542	DDIT4	1.89336e-25	0.455365	MT-ND5	1.3112e-15	0.909673	TMEM70	6.15606e-20	0.411975	HSPA8				0.00974583	0.784425
1.11603e-05	0.414882	HSPA2	2.65818e-09	0.478787	TAOK3	2.38632e-06	0.482958	SLC16A3	2.80553e-07	0.291154	ZFP36L11	1.06797e-11	1.21638	ING4	0.000151519	2.14959	CPM	2.71311e-05	0.513203	NFKB1	4.04409e-18	0.584682	TAP1	1.00018e-20	1.79699	NCF1B	1.04149e-18	1.17933	KCNA3	6.0666e-09	0.605966	ATG4C	8.02349e-06	1.35968	XBP1	2.59311e-25	0.681732	LEPROTL1	1.3209e-15	0.596613	RPL39	7.57191e-20	0.448061	P4HA1				0.00988996	0.688167
1.14515e-05	0.496035	DNAJB4	3.04398e-09	0.359491	EIF4E3	2.38659e-06	0.534356	ZDBF2	3.15519e-07	0.435833	BLVRA	1.06996e-11	1.70032	CEP68	0.000154712	0.455513	PTPN9	2.99017e-05	0.71147	MCL1	5.29673e-18	0.289846	IQGAP1	1.05468e-20	0.644528	SFT2D2	1.08419e-18	0.561943	YIPF3	6.72e-09	0.625622	TPMT	8.17883e-06	0.966344	TMEM105	4.80262e-25	0.454949	SKP1	1.32885e-15	0.253531	PSME4	1.2223e-19	0.467437	NME1				0.0099146	1.55852
1.19082e-05	0.585403	ORAI1	3.23082e-09	0.830924	DCLRE1C	2.41006e-06	0.308108	PAF1	3.31384e-07	0.519632	BTN2A2	1.27626e-11	0.893368	FRG1HP	0.000155845	0.399401	OAT	3.00034e-05	0.265212	SRSF2	5.46004e-18	0.74523	RNF145	1.06774e-20	1.89543	PREX1	1.17201e-18	0.862071	RHOB	7.48639e-09	0.500485	ATP5F1	8.2041e-06	0.578493	RER1	5.22114e-25	0.335052	SLC38A2	1.343e-15	0.367823	GPR35	1.2731e-19	0.252224	NDUFB6
1.20233e-05	0.402101	CLCN2	3.25538e-09	0.339891	ARHGEF3	2.44662e-06	0.486339	ARSG	3.45508e-07	0.627194	YEATS4	1.33372e-11	2.084	ZNF585B	0.000158428	0.806581	DNM2	3.03773e-05	0.370123	C1ORF162	5.56515e-18	0.945975	ALDH3A2	1.09397e-20	1.44983	CNTRL	1.41564e-18	0.449241	SLC38A10	7.62802e-09	0.46629	MTHFD2	8.30695e-06	1.0772	IL3RA	6.10191e-25	1.18453	PHTF1	1.40731e-15	0.325859	ALG2	1.43568e-19	0.553928	RRAGD
1.21741e-05	0.438122	LDLR	3.69639e-09	0.252408	LCK	2.49368e-06	0.31197	P3H4	4.28489e-07	0.300129	SUSD6	1.35455e-11	0.569424	LPAR6	0.000162149	0.417108	PDE4B	3.09117e-05	2.08326	MCTP2	5.60264e-18	0.640955	SQRDL	1.15444e-20	0.643785	PLCD3	1.44257e-18	0.269541	GOLIM4	7.95376e-09	0.412777	RPL35A	8.43846e-06	0.45269	SPPL2A	6.99561e-25	0.398496	HNRNPA1	1.41078e-15	1.44013	PSIP1	1.86351e-19	0.524341	NENF
1.27627e-05	0.279392	SPTY2D1	3.91406e-09	0.690976	FADS1	2.51505e-06	0.528322	SLC37A1	4.29132e-07	0.388796	MIF	1.39995e-11	1.91052	N6AMT1	0.000179505	0.667793	USP3	3.11066e-05	0.471278	TIFA	6.78153e-18	0.956941	UBASH3B	1.2135e-20	2.14595	CMTM6	1.57591e-18	1.75569	CXORF21	8.29889e-09	1.08737	FCGR2B	9.10998e-06	0.449605	SEPT7P2	7.74391e-25	0.379767	ILF2	1.41208e-15	1.65013	ASGR2	2.02918e-19	0.912352	BOLA3
1.32662e-05	1.05576	ACOXL	4.33572e-09	0.408642	IFITM2	2.66079e-06	0.534497	ZBTB25	4.44086e-07	0.62433	PAM	1.46639e-11	0.768792	FAM102A	0.000184858	1.27202	CASS4	3.12637e-05	0.274139	SYTL1	6.99384e-18	0.610124	MEF2D	1.257e-20	2.2605	TBC1D5	2.13967e-18	1.40885	AIG1	9.86888e-09	0.257815	MCTS1	9.13334e-06	0.511444	ABHD3	1.18165e-24	0.296995	ELMO1	1.46996e-15	0.609645	RPL37A	2.05048e-19	1.22602	CDCP1
1.33187e-05	0.591398	PASK	4.35208e-09	0.484941	GUSBP3	2.85966e-06	0.429271	ZBED2	4.72061e-07	0.254846	ATP6V0C	1.55253e-11	0.808829	LINS1	0.000189911	0.357033	RAN	3.49549e-05	0.466115	OSTC	7.74272e-18	0.471763	PSAP	1.30496e-20	2.83905	MICAL3	2.52264e-18	1.42528	CD9	1.16517e-08	0.273271	RPL35	9.20162e-06	0.692381	PDLIM7	1.51774e-24	0.36922	EMD	1.48103e-15	0.814607	AAED1	2.77051e-19	0.665753	PLEKHO2
1.33948e-05	0.317499	ATP6V1A	4.3608e-09	0.539499	TADA3	2.90169e-06	0.474981	CLN6	5.44325e-07	0.272639	ATP5G2	1.59264e-11	1.05148	UBA7	0.000191267	0.481691	WIPF1	3.59803e-05	0.415009	ACAA2	7.94751e-18	0.437832	SUMO2	1.5114e-20	1.39965	ZNF431	2.60164e-18	6.04665	MDK	1.17605e-08	0.674091	EXOC5	9.38721e-06	0.477411	ABHD11	1.61182e-24	0.753553	ZFP36	1.54727e-15	1.10747	SRRM2	4.2425e-19	0.476558	NTAN1
1.35179e-05	0.622121	KLHL24	4.74729e-09	0.429242	VEZF1	3.08581e-06	0.281005	ZC3H12D	5.4593e-07	0.454772	TRIM44	1.63359e-11	1.75886	CYHR1	0.000193493	0.632977	DNTTIP2	4.38464e-05	0.289822	ARL2BP	9.99677e-18	0.614019	CREM	1.6033e-20	1.41153	SZT2	2.82811e-18	1.49561	EHMT1	1.19053e-08	0.592644	IL16	9.44371e-06	1.092	MARCKSL1	1.61638e-24	0.272159	RBM8A	1.60141e-15	0.530388	HNRNPLL	8.51239e-19	0.84398	TMEM107
1.45285e-05	0.315962	ARID4B	5.57761e-09	0.656039	STAG3L1	3.30446e-06	0.305896	C8ORF34	5.63089e-07	0.261855	GLIPR2	1.92539e-11	0.684195	EEF2	0.000224037	0.263036	SRSF3	4.52631e-05	0.722109	SLCO3A1	1.07077e-17	0.936346	DYNC1I2	1.62892e-20	0.871805	ANKLE1	2.85316e-18	3.23757	PLTP	1.25409e-08	0.318283	RPS27A	9.7997e-06	1.76202	TRIB1	1.69268e-24	0.587414	PBXIP1	1.61405e-15	2.25478	KLF11	1.05854e-18	0.543519	CHMP1B
1.49391e-05	0.251373	FAM69A	5.88171e-09	0.601629	UTS2	3.44146e-06	0.329822	PEBP1	5.67834e-07	0.46615	ECI2	1.94422e-11	1.20662	TPR	0.000224611	0.40833	HNRNPH2	4.60856e-05	0.261223	BIN1	1.2806e-17	1.13316	GLCCI1	1.63662e-20	2.51143	PXK	3.04206e-18	0.953513	TAPBPL	1.41024e-08	0.358195	UBE2N	1.00613e-05	1.39021	CHMP4B	1.70777e-24	0.832704	SVIP	1.63778e-15	1.14027	CDH23	1.23267e-18	0.264915	PHLDA2
1.50104e-05	0.288136	EIF4A2	6.1096e-09	0.392186	ARL6IP4	3.50415e-06	1.17828	HIP1	5.72972e-07	0.981426	ENTPD11	2.18682e-11	0.898526	C12ORF65	0.000236748	0.349533	HLA-J	4.62311e-05	0.710793	ELL	1.30452e-17	1.05195	THADA	1.70261e-20	1.96645	TMEM40	3.12468e-18	0.354034	SLC38A2	1.51956e-08	3.19413	TIGAR	1.00731e-05	1.21274	B4GALT1	1.76645e-24	0.339358	LRRC75A-AS1	1.83876e-15	2.1804	IL15	1.33675e-18	0.250345	CD164
1.51364e-05	0.399922	GRPEL1	6.16557e-09	0.299611	GLG1	3.67025e-06	0.274326	NIM1K	5.7935e-07	0.327832	NDUFS7	2.32416e-11	0.48634	ZNF268	0.000246122	1.1199	CFAP69	4.6916e-05	0.348483	EIF5A	1.42688e-17	0.900424	ICA1	1.75224e-20	0.722194	METTL21A	3.98011e-18	1.9337	SELPLG	1.77699e-08	0.293127	CMTM6	1.04524e-05	0.306892	FHL2	3.0337e-24	1.87946	SLCO2B1	1.97035e-15	0.467478	GTF3C4	1.33987e-18	0.267429	CYSTM1
1.51374e-05	0.41255	TMF1	6.7639e-09	0.622355	DIDO1	3.69343e-06	0.809155	HMGCS1	6.04748e-07	0.307047	PCNA	2.35905e-11	2.93412	VSIG1	0.000251645	1.12778	KCNK6	4.8679e-05	1.69966	IFNG	1.54843e-17	0.756315	NME1	1.88945e-20	1.2517	NCOR1	4.35168e-18	0.436147	ALKBH7	1.79583e-08	0.80917	FAM65C	1.05651e-05	2.69375	SKI	3.22018e-24	0.393852	FXYD5	1.98407e-15	0.707228	ARPC1B	1.61425e-18	0.322739	TCEAL3
1.52602e-05	1.07199	SIK3	6.93303e-09	0.842034	SUGP2	3.87833e-06	0.851608	TRIM39	6.29885e-07	0.331812	CORO1C	2.52263e-11	1.52396	SNHG20	0.000273465	0.582279	HGSNAT	5.11543e-05	0.391669	LINC00674	1.5938e-17	0.90823	MBIP	2.25829e-20	2.96327	TGFBR2	4.78767e-18	0.966403	CREB3	1.82543e-08	0.583808	MYCBP	1.11594e-05	1.15475	BAIAP2L1	3.27988e-24	0.846635	FAM107B	2.28788e-15	1.555	ULK1	2.41244e-18	0.318041	CD274
1.55798e-05	0.655806	WNK1	7.06552e-09	0.95176	NPRL3	3.9401e-06	0.806558	PHTF1	6.41318e-07	0.669864	TYMS	2.60629e-11	2.06752	ZNF737	0.000279938	0.413879	ERO1B	5.15447e-05	1.38555	MAN1C1	1.76463e-17	0.910301	CCDC167	2.26021e-20	1.22104	KMT2E	4.99255e-18	0.795661	ABCB5	1.97729e-08	0.436221	ATP2B4	1.13102e-05	1.70023	ITPRIP	3.79925e-24	0.629623	NEK1	2.30095e-15	1.57977	FRY	2.5419e-18	0.291016	MOB3B
1.59602e-05	0.577636	CDK17	7.38093e-09	0.395746	BRK1	4.0637e-06	0.352527	PTP4A11	6.5773e-07	0.437436	RBBP4	2.6402e-11	1.00727	SMDT1	0.000282432	0.38858	CCDC144A	5.36598e-05	1.82888	TNFSF13B	2.55811e-17	0.901041	SLC35D1	2.40891e-20	3.34092	KIAA0430	6.15214e-18	0.573762	IFNAR1	1.99435e-08	0.29194	ATF5	1.14448e-05	0.295341	PRKCB	4.0803e-24	0.926671	TRAF4	2.34597e-15	0.658084	CERCAM	2.9029e-18	0.651399	CHID1
1.63561e-05	0.847328	ITSN11	8.0932e-09	0.304735	FAM107B	4.12849e-06	0.57935	LINC00964	6.71199e-07	0.313234	IL2RB1	2.71872e-11	1.81072	BNIP3	0.000286643	0.583385	POLR2K	5.47992e-05	0.913586	CHST12	2.65478e-17	0.525625	BST2	2.59728e-20	1.14847	BDH1	7.01277e-18	0.347026	PLIN5	2.02623e-08	0.318602	GGCT	1.18208e-05	1.14308	EIF4E	4.21186e-24	0.317372	PPP3CA	2.46483e-15	1.14709	MTSS1	3.51864e-18	0.282156	RMDN3
1.70072e-05	0.439594	RGPD1	8.85642e-09	0.397671	ARRB2	4.24752e-06	0.55384	MGP	7.2684e-07	0.287113	UBL7	2.73132e-11	0.608261	GRAP	0.000295515	0.375561	OPHN1	5.6425e-05	0.571084	PMS1	2.76191e-17	0.793867	UNC119	2.62301e-20	1.84284	CDC40	8.42414e-18	0.966849	FOS	2.08657e-08	0.608476	MRPL12	1.23045e-05	1.47478	ARL14EP	4.49364e-24	0.284061	LINC01531	2.60529e-15	0.431493	ITGB7	4.73424e-18	0.801086	TNFRSF21
1.70265e-05	0.348312	GOLGB1	9.19462e-09	0.619583	CSK	4.40913e-06	2.51926	FCRL1	8.2819e-07	0.264602	PGM2	2.8609e-11	1.05704	MX2	0.000320947	0.494062	ETF1	5.91162e-05	0.291225	SSR3	3.07343e-17	1.58377	SLC41A2	2.63405e-20	4.58168	SATB1	8.56992e-18	1.46362	FAM174A	2.22639e-08	0.34111	ZDHHC18	1.24958e-05	1.49703	LEPROT	4.70478e-24	0.303714	MT-CYB	2.62508e-15	0.834708	KCNIP4-IT1	6.95382e-18	0.436509	APOO
1.73588e-05	1.26486	RERE	1.01278e-08	0.564642	LMBRD2	4.41659e-06	0.697868	NUDT14	8.88349e-07	0.319536	PSMC3	2.88301e-11	0.691821	DYRK2	0.000322574	0.484851	FAM60A	6.58449e-05	0.35455	TPST2	3.16387e-17	0.477536	DYNLL1	3.05175e-20	1.71017	ELF1	9.15912e-18	0.428341	HSD17B10	2.24474e-08	0.619038	EZR	1.27904e-05	0.522481	OTOA	9.84939e-24	0.611904	NASP	2.83316e-15	0.751454	RPL28	1.08667e-17	0.664943	CYB5A
1.77324e-05	0.623575	AGO2	1.06564e-08	0.638823	LIAS	4.51658e-06	0.382718	DENND1B	9.17743e-07	0.332423	SEC61G	3.27086e-11	0.515093	LSAMP	0.000322617	0.360365	POLR1E	6.64799e-05	1.04694	GCH1	3.31685e-17	0.839678	AFTPH	3.15457e-20	1.15894	C6ORF132	1.02446e-17	1.47956	SOCS3	2.4055e-08	0.398591	LY75	1.30138e-05	1.5592	GRAMD1A	1.00346e-23	2.11416	CPNE5	3.00108e-15	1.18395	SLC7A7	1.2669e-17	0.557897	FAM58A
1.77752e-05	0.287505	DDX21	1.07396e-08	0.646483	PEX11B	4.77127e-06	0.372883	GNG2	1.09723e-06	0.537852	C3ORF38	3.28329e-11	1.53218	NOL4L	0.000336525	0.679154	CFAP36	7.31464e-05	0.533862	NUP62	3.62576e-17	2.77188	SUOX	3.20159e-20	2.46619	RRP7BP	1.10901e-17	0.783024	YIF1A	2.48033e-08	1.5872	CALCRL	1.34412e-05	0.505886	AP2B1	1.32743e-23	0.789456	FHL3	3.23688e-15	0.803263	NUDT16	1.38256e-17	0.406601	ATF5
1.78489e-05	0.473764	MXD1	1.09691e-08	0.619311	SNX20	5.15721e-06	0.633773	SLC7A5P1	1.21477e-06	0.353433	FKBP5	3.43117e-11	1.20759	TRNT1	0.000353172	0.677657	PLXDC1	7.40696e-05	1.09315	SPEF2	4.63879e-17	0.494751	ELOVL5	3.27944e-20	1.72036	MSN	1.11449e-17	0.794037	ADI1	2.48057e-08	0.340755	LCP1	1.36518e-05	0.745013	KCNJ3	1.71353e-23	1.0717	C21ORF91	3.74811e-15	1.60569	CD33	1.47222e-17	0.944616	INHBA
1.82406e-05	0.592272	MX2	1.1187e-08	0.637019	NCR1	5.42928e-06	0.972954	NCF4	1.23674e-06	0.524422	COA6	3.66128e-11	0.429222	CSGALNACT1	0.00037715	0.489831	TSC22D2	7.50329e-05	0.275301	CAPN1	4.97107e-17	1.77755	TNIP3	3.68058e-20	0.32063	ZNF419	1.2286e-17	1.14106	TMEM107	2.69441e-08	0.3394	EBP	1.44214e-05	1.89412	KMO	1.7379e-23	1.72179	CHST12	3.78481e-15	0.530995	LAT2	1.55699e-17	0.834638	AKT1S1
2.02177e-05	0.862743	DNAJA4	1.14818e-08	0.763266	SNAPC3	5.47777e-06	0.619142	STAM	1.28406e-06	0.253109	FDPS	3.72166e-11	1.05987	SPDYE3	0.000387082	0.410185	MORF4L2	7.95572e-05	0.749373	KDM6B	5.32198e-17	0.593532	GOLGA8B	3.68562e-20	1.64371	DHX57	1.33312e-17	0.667749	DANCR	3.14366e-08	0.303919	PRMT1	1.47567e-05	0.704134	DCTN1	1.76149e-23	0.819949	CALU	4.41847e-15	0.443325	SLC4A7	1.62314e-17	0.874512	QKI
2.28733e-05	0.680199	MED14	1.15304e-08	0.411361	FAM49B	5.74954e-06	0.265393	ITGB7	1.30542e-06	1.17912	CLIC51	3.81584e-11	1.67971	EPB41L4A-AS1	0.000391621	0.551377	WBP2	8.07384e-05	1.02687	CISH	5.91202e-17	0.716696	MYO1C	3.73867e-20	3.40957	UBAC2	1.42693e-17	0.617809	GUK1	3.20755e-08	0.458179	WDR77	1.52111e-05	1.40368	IL10	2.14615e-23	0.586803	AP2M1	5.22586e-15	1.5098	NUCKS1	1.74268e-17	0.434401	ARL1
2.43426e-05	0.252894	PARP10	1.21093e-08	0.637617	OAS2	6.13107e-06	0.256383	DDX18	1.40679e-06	0.498898	DDT	4.2383e-11	0.632499	SP110	0.000416037	0.40038	NFE2L2	8.19276e-05	0.586686	VPS13A	6.10801e-17	0.697175	UBE2B	3.93565e-20	0.339136	CDKL1	1.48452e-17	3.77017	APOBEC3B	3.34833e-08	0.482007	GRSF1	1.54796e-05	0.62828	PGS1	2.52122e-23	0.954332	HSPD1	5.68551e-15	1.38541	TRPV2	2.40217e-17	0.635326	HS3ST1
2.43526e-05	0.778824	JOSD1	1.23015e-08	0.332719	NDUFB10	6.16872e-06	0.259258	IDS1	1.6517e-06	0.542735	AKAP2	4.40664e-11	1.10958	TRIM52	0.00042885	0.349586	BDH1	8.37671e-05	0.318691	UBAC2	7.10236e-17	0.561121	PSMB1	4.26739e-20	1.8823	CYFIP2	1.66846e-17	1.02417	IFT27	3.52941e-08	0.297033	C8ORF59	1.60684e-05	1.37115	DRAM1	2.67359e-23	1.01668	DUSP6	7.38887e-15	0.440638	MPC2	3.4438e-17	0.447	PSMD14
2.55603e-05	0.326213	MTHFD2	1.25816e-08	0.250744	RPS8	6.23178e-06	0.359442	ZC3H8	1.65798e-06	0.294546	MRPL51	4.46811e-11	0.883964	MFNG	0.000431423	0.602256	PITHD1	9.42051e-05	0.886547	SLC15A4	7.75849e-17	1.11678	GLUD1	4.40682e-20	1.4688	LYRM7	2.18186e-17	0.702025	RAPGEF1	3.56228e-08	0.647933	LSM1	1.62043e-05	0.808793	DNAH17	3.11767e-23	0.766723	TOB2	8.07498e-15	0.452096	SEC61A1	3.49022e-17	0.694396	SERPINH1
2.6011e-05	0.304758	MGAT4A	1.2602e-08	0.510426	KRI1	6.23945e-06	0.368893	ZBTB20	2.07957e-06	1.54279	INPP5F	4.66595e-11	0.892033	IMMP2L	0.000474803	0.252862	DDX24	9.79385e-05	0.414453	ACSL5	8.67387e-17	1.2657	AKIP1	4.70619e-20	1.26613	H3F3A	2.25645e-17	2.47493	PGM3	3.61706e-08	1.55042	BCL11A	1.73244e-05	0.284726	BAG6	3.40044e-23	0.920799	NFIA	8.35131e-15	0.399296	CYB5R3	3.64326e-17	0.39447	ZNF706
2.74706e-05	0.95387	SEMA5A	1.26058e-08	0.905125	SSBP3	6.79375e-06	0.561696	SAMD8	2.14796e-06	0.267686	JAK3	4.73192e-11	0.817603	MSL3	0.000524682	0.629796	CCNT1	0.000108363	0.303473	TMOD2	9.04487e-17	0.467041	MRPS6	4.79622e-20	0.868399	EMP2	2.42704e-17	3.33154	GGH	3.7714e-08	0.467993	ACTR3	1.73423e-05	0.274268	BLOC1S2	3.55668e-23	0.273926	MSRA	8.54616e-15	1.31084	GMIP	3.68602e-17	0.3523	ATP6V0C
2.81829e-05	0.260315	EIF4G2	1.30728e-08	0.381684	PPM1M	7.18483e-06	0.300973	LPIN2	3.0966e-06	0.393915	CAB39	4.97672e-11	1.38967	SDCCAG8	0.000529131	0.518114	ZNF609	0.000113842	0.368253	OAT	9.58469e-17	0.860539	PHPT1	5.00666e-20	2.50622	GTF3C3	2.51069e-17	0.994402	RPL36AL	4.49153e-08	0.412908	MOB1B	1.73997e-05	1.89747	ZNF470	3.88729e-23	0.66008	JUNB	9.00738e-15	0.286779	LAT	3.78559e-17	0.366639	SLC25A19
2.85547e-05	0.620916	TACC2	1.33808e-08	0.743529	PEPD	7.52535e-06	0.306609	ZNF529	3.22968e-06	0.392629	IGSF8	5.07518e-11	0.505874	NACA	0.000541894	0.404228	TMEM70	0.000114245	0.492484	CDC25B	1.28488e-16	0.776693	GSTO1	5.29917e-20	1.41718	LINC00939	2.64359e-17	1.57756	CHPF2	4.51457e-08	0.461018	NOLC1	1.75634e-05	1.33572	IRAK1	4.54043e-23	0.5525	TDG	1.07424e-14	1.2427	GCA	4.98915e-17	2.1456	CHI3L1
2.89753e-05	0.559775	ASAH2B	1.42265e-08	0.79831	PYM1	7.57295e-06	0.574499	AMPD2	3.24892e-06	0.88678	QSOX1	5.27115e-11	0.517664	TRAT1	0.000549613	0.708545	HSPA4	0.000129701	0.473426	CCNH	1.65459e-16	0.821624	TNIP2	5.56913e-20	1.1597	TBC1D8B	2.91203e-17	0.890581	AVL9	4.65072e-08	0.317304	TIMM8B	1.78428e-05	0.473001	RSBN1	4.56129e-23	0.675697	HSPA8	1.23125e-14	0.829322	XAF1	5.64615e-17	0.403199	TP53I13
2.92692e-05	0.441523	RNF168	1.57615e-08	0.373519	DGCR8	7.59449e-06	0.429618	SESN11	3.34781e-06	0.69619	MSMO1	5.29965e-11	0.324982	RPLP1	0.000556624	0.503713	CMTM7	0.000131414	0.461899	ARHGAP26	1.67184e-16	0.401008	ALDOA	6.4899e-20	1.7017	SNN	2.9925e-17	0.305572	TP53INP1	4.78781e-08	0.813357	MARCKSL1	1.81554e-05	0.799397	RORA	5.91867e-23	0.46052	CNBP	1.24894e-14	0.406539	TYMP	5.9641e-17	0.553809	CA2
2.94373e-05	0.509706	SNAPC1	1.63799e-08	0.53061	STAG3L2	8.30754e-06	0.253231	ATF41	3.39496e-06	0.572553	BPGM1	5.44976e-11	1.60173	TPCN1	0.000559415	1.25126	TBL1X	0.000132589	0.53951	GIMAP8	1.78887e-16	0.591006	NT5C	6.55336e-20	3.05134	PLD4	3.0252e-17	2.76695	PPCDC	4.88946e-08	0.305507	LDHB	1.81918e-05	0.729824	DYNC1I2	5.99001e-23	0.546559	SLC5A3	1.38893e-14	0.552617	CLMN	6.90574e-17	0.33101	MRPL39
3.13266e-05	0.910436	SELL1	1.75059e-08	0.710105	TRAPPC2	8.58777e-06	0.6758	RRP12	3.51117e-06	0.404129	SUCLA2	5.99636e-11	1.69222	BDH1	0.000569236	0.841348	RILPL2	0.000143486	0.329491	GTDC1	2.35709e-16	0.405779	LUZP1	7.71301e-20	0.972513	RPS8	3.60951e-17	1.62607	BCL2L1	4.91044e-08	0.666825	CA2	1.85798e-05	0.456538	ELMO2	6.73271e-23	0.757517	FLNB	1.71567e-14	0.461636	RPS13	7.22409e-17	0.303379	HN1
3.14761e-05	0.274859	CYCS	1.79677e-08	0.495351	ZBTB38	9.46424e-06	0.617622	SNHG15	3.54578e-06	0.291974	RAB10	6.18139e-11	1.22288	GSTM3	0.000590547	0.621525	MFSD14A	0.0001437	0.747263	SLC25A24	2.48877e-16	0.66166	PAPSS1	8.0252e-20	0.282024	FAM83F	4.01132e-17	3.49684	CHST2	5.25634e-08	0.36396	RAP2A	1.8918e-05	0.543732	ZNF121	7.49717e-23	0.569684	CATSPER1	1.76921e-14	0.311595	MESDC2	7.93312e-17	0.59541	HIF1A-AS2
3.18374e-05	0.533317	ALG13	1.87433e-08	0.983412	CCDC7	9.60531e-06	0.446388	HSPA5	3.57983e-06	0.504365	CACYBP1	6.658e-11	0.964364	RNF216	0.000622026	0.442527	STAT5B	0.000150906	0.251405	TMBIM1	2.51152e-16	0.295289	TM9SF2	9.94933e-20	1.67078	SNX29	4.01458e-17	2.00149	ATG4A	5.48006e-08	0.571136	ARF3	1.90504e-05	1.3004	INSIG1	1.24852e-22	0.356869	FAM53C	1.86101e-14	1.15067	TRIM38	9.85488e-17	0.537171	PRPS2
3.20416e-05	0.48669	SLC6A6	1.99022e-08	1.0634	LINC01089	9.63955e-06	0.688942	ANKRD42	3.60965e-06	0.290783	PFKP	6.75793e-11	0.429762	CCM2	0.000648855	0.632135	KDM6B	0.000154252	0.329358	RASAL3	2.72129e-16	0.550943	ADRM1	9.97555e-20	3.19891	PRKX	4.41569e-17	0.956988	R3HCC1	5.86266e-08	0.319359	CSNK2B	1.95319e-05	0.279097	SETX	1.79101e-22	1.01694	BNC2	2.05269e-14	0.679428	RRN3	1.12933e-16	0.334669	PPIA
3.30572e-05	1.9122	CDH1	2.08668e-08	0.384065	PSMB8	9.95967e-06	0.610583	YES1	3.66508e-06	0.318429	COX6B1	6.86846e-11	0.841038	EIF4B	0.000654113	0.279359	NOP58	0.000157071	0.909553	IFI44L	3.45963e-16	0.313662	EMP3	1.00999e-19	0.447707	ZNF557	4.73562e-17	1.67504	BHLHE41	6.02919e-08	1.17573	SLC9A7	1.95737e-05	0.395001	NEUROD2	1.81204e-22	0.291206	PIP4K2A	2.11829e-14	0.527503	RNF145	1.13352e-16	0.46975	ZNF618
3.40731e-05	0.259569	MOCOS	2.1257e-08	0.382927	AP1M1	1.03595e-05	0.397012	CCL3	3.70131e-06	0.414617	TSPAN14	6.87693e-11	0.707162	NLRP1	0.000670287	0.804094	PHLDB1	0.00017002	1.34743	FBXL8	4.01694e-16	0.850858	GRPEL2	1.0423e-19	2.01731	THOC5	4.76853e-17	0.318141	GLT8D1	6.1146e-08	0.672389	PIN4	1.96771e-05	0.433221	GNPTG	2.0546e-22	0.272168	FHOD1	2.12046e-14	0.724921	DICER1	1.1847e-16	0.493801	DIRC2
3.45427e-05	0.545267	KLHL8	2.43429e-08	0.307994	P4HB	1.09165e-05	0.457359	SCUBE1	3.85193e-06	0.382069	PDIA6	6.87924e-11	0.902159	EPHB4	0.000791343	0.482877	DENND4A	0.000175734	0.61469	CPQ	4.34155e-16	0.627759	USP48	1.06524e-19	1.80718	VASP	5.35866e-17	1.92414	MAGED1	6.77723e-08	0.464966	MRPS36	1.97693e-05	1.01216	CHML	2.6239e-22	0.320485	TTYH2	2.13072e-14	1.59585	SORL1	1.36672e-16	0.645453	AHCY
3.50673e-05	0.379162	AKIRIN1	2.45201e-08	0.287828	THEM4	1.12092e-05	0.365562	SERINC5	4.03039e-06	0.54416	ZBTB32	7.38621e-11	1.32724	HEMK1	0.000829348	0.411145	ISCU	0.000179256	0.253212	LTBP4	4.35053e-16	0.674172	PKIA	1.23923e-19	2.33804	LDLRAD4	5.74041e-17	0.315428	CDK6	7.07429e-08	0.545114	DPM1	1.9954e-05	0.317183	SMARCA5	2.77936e-22	1.03117	SMAD7	2.41198e-14	1.28577	GPSM3	1.46766e-16	0.811695	SPIN1
3.54522e-05	0.687572	PIM2	2.50332e-08	0.291292	RUNX1	1.14709e-05	0.264623	DNAH2	4.34724e-06	0.287607	CD164	8.11662e-11	1.59769	ANK3	0.000869239	0.552697	RBM23	0.000193529	0.38717	FAM86DP	4.4394e-16	0.668554	STX11	1.2853e-19	1.05014	SPTAN1	6.47868e-17	0.945798	EDEM1	7.68064e-08	0.30372	ARPP19	1.99555e-05	0.84893	ACOT9	2.83902e-22	0.45706	SLC9A3R1	2.42937e-14	0.403917	MKKS	1.61034e-16	0.297212	ABCC3
3.68744e-05	0.557957	NT5C3A	2.57629e-08	0.486811	XBP1	1.2364e-05	0.568339	AVPI1	4.3777e-06	0.294266	SQSTM1	8.28796e-11	0.58662	ARHGEF1	0.000888962	0.367663	BTAF1	0.00020827	0.251147	UBE2L3	6.60084e-16	0.764246	PGAM1	1.65506e-19	2.63177	ETS1	6.52704e-17	0.520534	RAB1A	7.70201e-08	0.432833	BCL2L11	2.01296e-05	0.876538	LINC01558	5.01595e-22	0.768685	TMEM154	2.54866e-14	0.272786	TFG	1.76876e-16	0.254763	RAB7A
3.81757e-05	1.02948	ARNTL2	2.61231e-08	0.770831	CISH	1.24639e-05	0.297709	N4BP2L1	4.93539e-06	0.414874	RFC2	8.98447e-11	0.305936	MT-CO2	0.000907703	0.261168	ZNF37A	0.000220643	0.450217	SLC9A6	8.08617e-16	0.616583	TXNDC11	1.69807e-19	1.37094	PRRC2C	7.22849e-17	2.7847	MXD1	8.02652e-08	0.269068	PCBP1	2.05843e-05	0.356961	GUSB	5.59104e-22	0.609	MSI2	2.78858e-14	1.33419	RNF24	2.10158e-16	0.557641	UBE2E2
3.87006e-05	0.731656	MSR1	2.63682e-08	0.494278	CENPT	1.3492e-05	0.265757	C21ORF59	5.38308e-06	0.785318	ASB1	9.77955e-11	0.582165	CYFIP2	0.000983747	1.54958	TFPI	0.000227982	0.342832	CYB5R3	8.52232e-16	0.95543	FMNL1	1.98843e-19	3.2687	MMS22L	7.99031e-17	1.06392	FLCN	8.0813e-08	0.431008	PUM3	2.08917e-05	1.3299	FRRS1L	7.71373e-22	3.06262	RGS16	3.02296e-14	0.718715	F2RL2	3.26241e-16	0.633513	CSRP1
3.88029e-05	0.437809	TCOF1	2.71346e-08	0.687702	CDKN2D	1.35274e-05	0.298456	ACSM2B	5.49276e-06	0.47306	NRAS	1.01318e-10	1.01074	SLC25A45	0.000997163	0.591529	SVIP	0.000238178	0.370187	PDLIM2	9.2185e-16	0.617929	NFKBIA	2.36743e-19	1.00146	RPL6	8.00347e-17	0.300451	TMCO1	8.29433e-08	0.29412	PSMA4	2.2761e-05	0.652061	PCSK5	7.92007e-22	0.76961	CTR9	3.32709e-14	0.90327	ATP5E	3.92088e-16	0.807893	GPR160
3.89207e-05	0.347063	FEM1A	2.94667e-08	1.07825	GK5	1.44035e-05	0.435942	TWISTNB	5.5544e-06	0.488092	SYT11	1.02213e-10	1.1174	SH3YL1	0.000998532	0.679578	HEXIM1	0.000253673	0.360993	MOB1A	9.67497e-16	1.51528	FLNB	2.506e-19	0.680379	RPL27	8.2953e-17	1.19856	FUCA2	8.39626e-08	0.265514	GHITM	2.27713e-05	0.74762	CCNL1	1.05112e-21	0.47154	TP53BP1	3.35398e-14	0.825296	MT-ND3	4.42044e-16	0.513841	B3GNT2
4.1486e-05	0.701138	ZNF589	3.28237e-08	0.719738	KIF22	1.47759e-05	0.26651	NEU11	6.26673e-06	0.298568	NDUFB8	1.02758e-10	0.992409	APEX1	0.00100351	0.305385	ABLIM1	0.000256817	1.41195	GALNT6	1.20202e-15	0.509668	SMC4	2.58787e-19	2.27607	PIP4K2A	9.04177e-17	1.07154	SURF1	8.68386e-08	0.776668	TBC1D9	2.29618e-05	0.734125	CMC1	1.09951e-21	2.7733	ATP1A4	3.48048e-14	0.472103	RRBP1	4.87636e-16	0.528816	NELFCD
4.18057e-05	0.413685	USP9X	3.30234e-08	0.372281	KDM5A	1.57148e-05	0.432626	PPP1R10	6.27748e-06	0.365754	IL21R	1.21359e-10	1.84312	PAN2	0.00101119	0.60764	POR	0.000257143	1.06888	ETV3	1.21499e-15	1.05585	GDPD5	2.61032e-19	3.64376	BIN1	9.29803e-17	0.658573	PRDX5	8.69343e-08	0.260913	RPS9	2.48888e-05	0.419367	CPQ	1.11208e-21	0.568748	OAZ2	3.51398e-14	0.584675	FRK	1.0858e-15	0.380016	PDE4DIP
4.3478e-05	0.740442	NFKB2	3.33364e-08	0.542233	FAM217B	1.66562e-05	0.593858	PLEKHG2	6.82883e-06	0.359105	MEF2A	1.31342e-10	0.816795	DIDO1	0.00105367	0.465155	IGFLR1	0.000264728	0.497743	MDFIC	1.51602e-15	1.56739	SERPINH1	2.64744e-19	2.16909	CD40	1.02561e-16	0.312236	MBNL2	8.84498e-08	0.26147	RPS8	2.49795e-05	0.764543	NOCT	1.15466e-21	1.59491	AKAP5	3.65579e-14	0.309783	EDF1	1.13397e-15	0.379807	SPTAN1
4.47736e-05	0.896156	LPCAT3	3.36987e-08	0.420079	CD52	1.72664e-05	0.290377	OSBPL3	6.88848e-06	0.657985	PMF1-BGLAP	1.40277e-10	1.15617	2022-09-09	0.00106057	0.644363	D2HGDH	0.000278045	0.443621	TMX4	1.65331e-15	0.342984	RPS26	2.72456e-19	0.884601	ZNF471	1.54463e-16	3.46305	MGLL	9.10802e-08	0.336754	BCKDHA	2.52347e-05	1.125	MYO1E	1.4843e-21	0.250435	MT-CO3	4.12528e-14	0.869626	AMMECR1L	1.36689e-15	0.571472	UQCC2
4.57563e-05	0.561018	MLLT3	4.16096e-08	1.22044	PXMP4	1.75026e-05	0.645519	GALC	7.03929e-06	0.42433	LGALS9	1.42361e-10	1.05722	SLC46A3	0.00107511	0.264591	PDCL3	0.000280251	0.62253	PER1	1.76643e-15	0.32023	COX8A	2.85393e-19	1.85817	ITGB2	1.5672e-16	1.09178	CRYBG3	9.51379e-08	2.22096	ZEB1	2.62946e-05	1.20855	PDE8A	1.76889e-21	0.452815	PRKACB	4.19833e-14	0.890006	LINC00336	1.41482e-15	0.732854	EOGT
4.73189e-05	0.406097	HSPA6	4.19429e-08	0.638943	STK39	1.76621e-05	0.26894	SFPQ1	7.08794e-06	1.0477	USP6NL	1.43538e-10	0.94834	ERCC6L2	0.00110183	0.47848	PPIL4	0.000288221	0.273303	PCF11	1.81789e-15	0.311592	NDUFA13	2.90023e-19	2.18719	ACTR2	1.65446e-16	0.940282	FTSJ1	9.58804e-08	0.272823	PGK1	2.6765e-05	1.62953	C1ORF106	1.86832e-21	0.415524	MAPRE1	4.46555e-14	0.830689	STX10	1.63362e-15	0.300497	GGA1
4.90779e-05	0.493973	ARAP2	4.35988e-08	0.50096	PROSC	1.78675e-05	0.588564	CENPI	7.22505e-06	0.38717	CCDC28A	1.83203e-10	1.2962	MPHOSPH8	0.00110768	0.404888	LPCAT3	0.00029006	0.300741	ITGAL	1.9687e-15	2.15072	ATP6V0A1	3.01364e-19	1.21929	ARPC2	1.74528e-16	0.631548	NAXE	9.59245e-08	0.264633	GRPEL1	2.69803e-05	0.858514	HIPK3	2.11016e-21	0.569558	SLC43A3	4.50092e-14	0.683684	BOD1L1	1.95097e-15	1.76257	SETDB2
4.94983e-05	0.409264	STT3B	4.60409e-08	0.709599	SDR39U1	1.87965e-05	0.315855	HIPK1	7.47478e-06	1.03392	DBN11	1.84374e-10	1.22803	ATXN7L3B	0.00111516	0.461031	PPP2CA	0.000298408	0.583542	RCN1	2.08282e-15	0.275452	TET2	3.13677e-19	0.812378	LPGAT1	1.86069e-16	0.694302	ARF1	9.86402e-08	0.28449	HMGB1	2.7096e-05	1.07694	TRIM8	2.35972e-21	0.404879	HSPA9	5.01483e-14	0.4306	NMT2	1.96085e-15	0.25819	C19ORF60
4.97567e-05	0.507537	ELMO1	4.62192e-08	0.698559	ZKSCAN7	1.91678e-05	0.309265	DMD	7.74445e-06	0.403311	CARD19	1.85697e-10	1.0351	PCMTD2	0.00114783	0.670315	DCXR	0.000305616	0.301928	TRANK1	2.40513e-15	0.437902	ATP5A1	3.2854e-19	1.67775	CNN2	2.09485e-16	1.76395	UNC13C	9.93278e-08	0.494754	C1D	2.72053e-05	0.426383	RGPD6	2.36282e-21	0.258318	ARF1	5.05108e-14	0.874173	GLIPR1	1.96185e-15	0.414326	PHB
5.19103e-05	0.390324	BNIP3	4.68555e-08	0.29903	ATP5F1	1.96607e-05	0.308557	DNAJC3	8.09223e-06	1.10174	HSPA1B1	2.07949e-10	1.10656	CCDC66	0.00117188	0.419737	KAT6B	0.000312093	0.252123	AMFR	2.68564e-15	0.938545	FUCA2	3.76505e-19	0.905807	RACK1	2.46196e-16	0.83005	ANKS1B	1.00436e-07	0.310288	PPIH	2.84826e-05	0.605112	ZNF483	2.37076e-21	0.488562	KIF9	5.51879e-14	1.34964	RGS14	1.97577e-15	1.55565	NUPR1
5.32276e-05	0.432565	FAM213A	4.76909e-08	0.743686	ZNF22	2.00319e-05	0.44189	FAM102A	8.58705e-06	0.372117	WARS	2.24959e-10	1.26095	GSAP	0.00120316	0.369269	PAF1	0.000313633	0.307259	NDUFA4	3.42939e-15	1.33602	CORO1C	3.87524e-19	1.96022	OFD1	2.50784e-16	0.434608	MCL1	1.06115e-07	0.285699	RPL23	2.95867e-05	0.494404	ARID4B	3.07334e-21	0.360154	GADD45B	5.74954e-14	0.899843	YTHDF3	2.39084e-15	0.426501	RGS12
5.3531e-05	0.330777	FABP2	4.79656e-08	0.698548	MRPS11	2.03608e-05	0.681	CNBD2	8.58761e-06	0.861165	SSFA2	2.27409e-10	0.466758	VAMP1	0.00126495	0.781365	KIAA0319L	0.000313662	0.506222	ARFGAP3	4.20362e-15	0.419272	PLP2	3.93045e-19	2.41329	LYST	2.65961e-16	3.82018	COL24A1	1.2641e-07	0.521074	PDCL3	3.03926e-05	1.20683	MPHOSPH6	3.1801e-21	0.825389	BCAS2	5.76413e-14	1.22097	PRKACA	2.49189e-15	0.399314	GBP1
5.4147e-05	0.770617	HGSNAT	5.05414e-08	0.610307	KLHDC3	2.0993e-05	0.337558	SNHG8	8.69697e-06	0.394248	YWHAH	2.32228e-10	1.38558	MORC2	0.00126688	0.878063	PTCHD1	0.000318412	0.257291	PIK3R1	4.2611e-15	0.41775	LMAN1	4.18417e-19	2.6673	MAP4K2	2.77886e-16	0.84853	ADD2	1.29982e-07	0.374519	DERL1	3.07911e-05	0.923328	CSNK2A1	3.57806e-21	0.517461	SBDS	6.1012e-14	0.72607	SNRNP200	2.50806e-15	0.535008	FAM213A
5.47413e-05	0.328905	DBF4	5.11067e-08	0.916465	PGS1	2.18072e-05	0.522961	SPATA2L	9.20211e-06	0.432546	ASPH	2.32906e-10	0.707856	IKZF1	0.00130109	0.586364	HIVEP2	0.00032382	0.741084	PRR5	4.26937e-15	1.17383	IGF2R	4.31782e-19	1.57929	FLYWCH1	3.95558e-16	1.41153	PIGK	1.34554e-07	0.75309	TIMM9	3.08817e-05	0.593097	HSPA6	4.54971e-21	0.327703	HIF1A	7.38173e-14	0.273607	SCARB1	2.61054e-15	0.456044	HAPLN3
5.50148e-05	0.624494	C3ORF58	6.07241e-08	0.339028	SSR2	2.20338e-05	0.455603	C16ORF91	9.58359e-06	0.313045	NDUFA7	2.36508e-10	0.793219	GALT	0.00131761	0.477438	SS18L2	0.000326984	0.283669	DNAJC3	5.35613e-15	0.337133	NEAT1	4.41813e-19	1.32598	DNAJB14	4.03332e-16	5.12118	KCNB1	1.38839e-07	1.57877	MTERF1	3.31793e-05	0.262514	RBCK1	4.95507e-21	0.402368	SLC1A5	7.68304e-14	0.666492	DUSP3	3.05098e-15	0.319593	LINC01239
5.55994e-05	0.498061	TNS1	6.11761e-08	0.324023	MOB2	2.34686e-05	1.2373	GNAQ	1.0416e-05	0.329564	ZBTB17	2.36673e-10	1.0506	FBL	0.00132056	0.465209	SMG1	0.000329892	2.17068	GNLY	5.93228e-15	0.958311	CPEB4	5.04072e-19	1.01089	RASAL2	4.12863e-16	1.2266	C12ORF57	1.41917e-07	0.343486	MKKS	3.36515e-05	0.761323	SVIP	5.06848e-21	0.867017	MAML1	9.20529e-14	0.913524	NOTCH2	4.35147e-15	0.348732	CAPZB
5.56594e-05	0.62561	NOMO3	6.13906e-08	0.420517	MMP25	2.51321e-05	0.378226	PARVB	1.06445e-05	0.289881	DGUOK	2.37316e-10	1.49835	TECPR1	0.00137161	0.551322	MPZL3	0.000362974	0.669073	MYO9B	6.64511e-15	0.318309	CDKN1A	5.21088e-19	1.44641	DAZAP2	4.20206e-16	0.473655	EMP3	1.42131e-07	0.353507	HIST1H1C	3.42854e-05	0.927398	CHMP1B	5.11241e-21	0.45059	RENBP	9.21692e-14	1.40222	ZNF217	5.94535e-15	0.29717	CYCS
6.10891e-05	1.27423	CTPS1	6.32225e-08	0.405748	IKZF1	2.72155e-05	0.626341	IL4R	1.08795e-05	2.74503	SOX4	2.42131e-10	1.40115	BEX4	0.00139275	0.261956	WTAP	0.000368676	0.267534	IKBKG	6.76915e-15	0.360462	CMTM6	5.64296e-19	1.62381	LRRC75A	5.39328e-16	0.53255	ATP5J	1.46338e-07	0.896593	TXNDC5	3.49432e-05	1.54836	WARS	5.18219e-21	0.396291	RPL36AL	9.33846e-14	0.737058	PTPN18	6.54691e-15	0.739481	SRC
6.18317e-05	0.600177	SMARCA5	7.39487e-08	0.344113	HLA-F	2.72917e-05	0.303789	HIP1R1	1.1424e-05	0.374832	GGCT	2.61164e-10	0.885947	FTX	0.00139295	0.763711	ARSG	0.000384831	0.294981	EPS15	6.98198e-15	0.36883	ANXA5	5.7225e-19	1.67277	RGS19	5.74297e-16	0.800095	ATP6AP1	1.61472e-07	0.283124	ARPC5L	3.67395e-05	0.803893	OTUD1	5.80099e-21	0.384623	NXT1	1.22698e-13	0.577674	FER	7.50783e-15	0.279333	DSTN
6.18638e-05	0.265185	HAUS3	7.41788e-08	0.829397	CD320	2.82521e-05	1.00907	LINC01568	1.24478e-05	0.428375	NRBF2	2.6514e-10	1.49772	LYRM7	0.00141019	0.341234	CYTH1	0.000391049	0.378806	DENND4A	7.42657e-15	0.523696	GNG10	5.7973e-19	3.87324	IL18BP	6.2244e-16	0.711908	MAGT1	1.83952e-07	0.477802	RSU1	3.71012e-05	1.41519	RNF157	7.02855e-21	0.27276	SMARCAD1	1.24016e-13	0.391168	TAX1BP3	8.75072e-15	0.509657	CDC42BPB
6.36702e-05	0.60795	DHCR7	7.48042e-08	0.360293	CDC42EP3	2.9197e-05	0.423261	RP1L1	1.31397e-05	0.31549	EXOSC9	2.91957e-10	1.17715	UBQLN2	0.00142513	0.363053	LPAR2	0.000391203	0.302889	INPP5D	9.28312e-15	0.731327	MOB3A	6.7702e-19	0.851128	WTIP	6.26622e-16	0.290782	FOXO3	1.8711e-07	0.430735	LSM6	3.73583e-05	0.492899	PSENEN	9.03874e-21	0.253915	REL	1.26134e-13	0.370117	MPV17	9.35273e-15	0.270961	RMDN1
6.36762e-05	1.0621	PRKY	7.61881e-08	1.28233	SERPINB6	2.96107e-05	0.360416	PGPEP1	1.32286e-05	0.38739	COMMD8	3.14857e-10	1.30204	ZNF708	0.00143251	0.648737	COA1	0.000405071	0.425733	NCDN	9.62715e-15	1.06026	VPS54	6.92618e-19	3.30586	SYCP3	9.6006e-16	0.671321	MYO15A	1.94672e-07	0.324175	DUT	3.83402e-05	0.891105	GPM6A	9.15249e-21	0.8374	PEF1	1.32776e-13	0.702993	CTDSP1	9.59383e-15	0.677899	SLC29A1
6.77458e-05	0.384645	STAT5B	7.72144e-08	0.257411	PARP4	3.19587e-05	0.829358	LINC00963	1.33084e-05	0.265893	RAN	3.26649e-10	1.05798	RGS10	0.00146188	0.486205	HAUS3	0.000434531	0.41358	FAM50A	1.0889e-14	0.9182	SGPP1	1.05401e-18	0.904156	MLLT6	1.14126e-15	0.322169	HAX1	2.09115e-07	0.348381	C14ORF166	3.84038e-05	0.539255	SLC19A3	9.21447e-21	0.959945	C5ORF22	1.36133e-13	0.325601	CORO1C	1.36156e-14	0.35541	SURF4
7.02724e-05	0.474154	RNF10	7.84472e-08	0.487109	PGM1	3.45453e-05	0.336189	PTGER21	1.35828e-05	0.325605	COPB1	3.36021e-10	1.86925	WDR92	0.0014842	0.472892	PRAF2	0.000435218	0.672102	CDK17	1.11229e-14	0.849741	RAB10	1.11854e-18	1.56848	SCN1B	1.24715e-15	0.403687	INSIG2	2.32187e-07	0.350115	CPNE3	3.86894e-05	1.3001	IL4I1	1.09092e-20	1.00551	ERVFRD-1	1.38828e-13	0.354026	CPEB4	1.45058e-14	0.309009	SUSD6
7.08009e-05	0.394787	GPBP1	8.46803e-08	0.349975	EIF3D	3.90701e-05	0.451748	GSPT1	1.36814e-05	0.282978	PAPSS1	3.39122e-10	1.15599	RABEPK	0.00150359	0.35991	JARID2	0.000477435	0.263748	ZYX	1.13359e-14	0.375262	RALGDS	1.21485e-18	0.587884	CARMN	1.28951e-15	0.723528	HINT2	2.52293e-07	0.667701	AVPI1	3.95294e-05	0.255687	ITGAL	1.25317e-20	0.463097	SLC12A8	1.41584e-13	0.447979	GTF3C6	1.83877e-14	0.270046	DENND4C
7.10283e-05	0.673614	PSME4	8.48745e-08	0.530697	MIEN1	3.92602e-05	0.298605	CDR2	1.39752e-05	0.781558	KIF21A	3.43554e-10	0.811605	RSL1D1	0.00156265	0.2872	INPP4B	0.000477691	0.645398	INTU	1.25504e-14	0.711753	COMT	1.22104e-18	1.55825	MBNL1	1.32182e-15	0.878814	IRF4	2.55767e-07	0.895856	FBXO6	3.98475e-05	1.61509	C1ORF186	1.26041e-20	0.448138	ITM2B	1.48527e-13	2.00162	FAM78A	1.8766e-14	0.3213	SLC22A18
7.15177e-05	0.42325	TNFSF8	8.58147e-08	0.665845	TOR2A	3.95704e-05	0.54203	TAF13	1.42271e-05	0.580194	STAMBP	3.63648e-10	1.6932	KANK1	0.00163418	0.49837	SBDS	0.000509528	1.39363	DENND3	1.4797e-14	0.759735	ASB2	1.22566e-18	1.63715	CD24	1.38004e-15	0.796547	PAPSS1	2.76488e-07	0.451433	PPP1R7	4.25356e-05	0.560194	MPZL1	1.33147e-20	1.44402	YES1	1.59691e-13	0.760982	RCBTB2	1.91373e-14	0.343908	NHSL1
7.23319e-05	0.315232	ALDH7A1	9.51621e-08	0.800075	VPS33A	4.21517e-05	0.766392	ID3	1.44903e-05	0.663801	EMC2	3.71475e-10	2.05201	WHAMMP3	0.00167292	0.485652	MED30	0.00051709	0.700669	RIPK2	1.48746e-14	0.528203	RANBP9	1.24016e-18	2.19521	APBB1IP	1.50132e-15	0.786328	NME2	2.80591e-07	0.549002	DPAGT1	4.36095e-05	0.517103	SPG11	2.38123e-20	0.505744	POLR3E	1.67265e-13	0.278969	TRIM8	1.9966e-14	0.35388	ERLEC1
7.64529e-05	0.635855	LINC00668	1.11459e-07	0.925742	FXN	4.23981e-05	0.437981	USP361	1.4689e-05	0.417945	CTSB	3.81585e-10	1.52939	ILF3-AS1	0.00185304	1.29828	CLN8	0.000539869	0.982325	DENND5A	1.51754e-14	6.24187	CCL22	1.53563e-18	1.95703	ARPC4	1.58221e-15	0.272524	MESDC2	2.87194e-07	0.454316	RCN1	4.56468e-05	0.531796	TLCD2	2.59479e-20	0.631506	CCDC92	1.67299e-13	0.574588	TAF13	2.01502e-14	0.437399	SEMA4A
7.70768e-05	0.659117	BPGM	1.12558e-07	0.522092	MOB3A	4.25477e-05	0.300136	TRA2A	1.55212e-05	0.259537	EWSR1	3.90166e-10	2.82905	PECAM1	0.00191099	0.364251	TVP23C	0.00060016	0.760789	JMJD6	1.64673e-14	0.639799	PRNP	1.59385e-18	1.44088	NMNAT1	2.08702e-15	0.896001	DOCK7	2.88602e-07	0.611772	NCBP2	4.69231e-05	1.13323	GNA15	4.0409e-20	0.257608	DNAAF2	1.67571e-13	0.426326	FADS1	2.31443e-14	0.366997	HSPA5
7.7729e-05	0.342438	NDUFS5	1.17654e-07	0.502949	ANKRD49	4.54766e-05	0.393708	B3GAT3	1.572e-05	0.802925	OTULIN	4.13426e-10	0.937396	DHRS3	0.00192733	0.708594	DAPK2	0.000626061	0.309407	BZW1	1.8294e-14	0.614	CMC2	1.65916e-18	2.38476	DRAM2	2.08941e-15	0.984752	METTL7A	2.94301e-07	0.455495	ATP5A1	4.77643e-05	0.302953	ABCA7	4.70009e-20	0.536078	CRY1	1.69013e-13	0.38997	ANXA7	2.48739e-14	0.260107	CBR1
7.89891e-05	0.288039	PHKA2	1.19365e-07	1.03449	MT2A	4.85413e-05	0.30669	THG1L	1.58265e-05	0.511393	ABHD17B	4.33463e-10	0.633918	GABPB2	0.00195774	0.269413	TBC1D15	0.000634056	0.388123	MAP2K1	1.91991e-14	0.645592	ZCCHC6	1.83951e-18	1.98716	DBNL	2.13694e-15	0.325213	SEC22B	2.95887e-07	0.420199	MS4A6A	4.83338e-05	0.493351	BRWD1	6.65709e-20	0.457023	ARF4	1.81672e-13	1.00218	MICU1	2.95647e-14	2.01507	LIMA1
8.13165e-05	0.434269	GNAS	1.2163e-07	0.513802	NOL4L	4.88172e-05	0.288144	PNPLA2	1.59422e-05	0.471985	HNRNPA3	4.5515e-10	0.891407	ST13	0.00197626	0.290961	HMGA2	0.000663565	0.508636	EIF4EBP2	2.1536e-14	0.820411	HERC5	1.8416e-18	1.02671	PDLIM2	2.28959e-15	0.829858	COPB2	3.09637e-07	0.271348	BRAF	4.93149e-05	0.463328	ACLY	7.0002e-20	0.355208	EEF1G	1.86422e-13	0.943733	CAMKK2	3.67084e-14	1.6184	IL2RA
8.19499e-05	0.415076	STRIP1	1.2588e-07	0.423881	AGGF1	5.04335e-05	0.333224	NAV1	1.71093e-05	0.378416	TOMM5	5.51614e-10	1.20073	LINC01128	0.00210536	2.18971	PON2	0.000724264	0.296871	C16ORF72	2.16158e-14	0.534769	NDUFB8	1.84295e-18	0.733035	TTC7B	2.4518e-15	0.908242	CD6	3.2909e-07	0.749158	CD40	5.04457e-05	1.38532	MAP2K1	8.89296e-20	0.425789	ENSA	2.00764e-13	1.23398	OSBPL11	3.97398e-14	0.349015	TDP2
8.49344e-05	1.46028	DLGAP1	1.30509e-07	0.38876	FERMT3	5.19054e-05	0.254776	SLC43A3	1.74646e-05	0.30639	FRG1	5.68807e-10	0.601069	TBC1D10C	0.00219473	0.625023	ZNF790	0.000754204	0.363324	RP2	2.45643e-14	0.88103	NAGA	1.92548e-18	2.0019	STAG3L3	2.78546e-15	0.274036	NDUFAF3	3.35745e-07	0.724408	DCPS	5.08509e-05	0.430748	FAM120B	1.01945e-19	0.481074	TIPARP	2.17932e-13	0.497778	RPL9	4.11512e-14	0.366707	ACER3
8.78673e-05	0.252536	EGR2	1.31464e-07	0.267713	CECR1	5.3599e-05	0.570816	ARIH11	1.83814e-05	0.37095	IFI44	6.1513e-10	1.118	HIST1H1D	0.00219936	0.505467	CD28	0.000772004	0.287185	LYSMD2	3.14482e-14	0.461239	SAMD9L	1.99098e-18	2.24387	LINC00310	2.89015e-15	0.329075	TVP23B	3.3811e-07	0.268219	AASDHPPT	5.22422e-05	0.310422	PTGIS	1.09795e-19	0.508318	STIP1	2.3173e-13	1.17616	RASSF4	4.16514e-14	0.535108	ACOT2
8.86533e-05	0.324544	RSPH3	1.31668e-07	0.835253	ANK1	5.43372e-05	0.560922	TP53INP1	1.84799e-05	0.319321	SH3GLB1	6.62612e-10	1.0322	RAPGEF6	0.0022047	0.447053	EVI2B	0.000786082	0.324984	P4HA2	3.22381e-14	0.930641	ASXL1	1.99729e-18	1.39611	GAS5	3.05676e-15	1.74915	BCL2L11	3.4525e-07	0.522689	HIGD1A	5.34451e-05	1.14188	KTN1	1.19485e-19	0.258046	CSDE1	2.34895e-13	1.06881	RNF166	4.69172e-14	0.295299	PEBP1
9.23284e-05	0.388822	BCL11B	1.40281e-07	0.866407	HERC6	5.54419e-05	0.348462	LGALS3	1.8822e-05	0.301502	MEMO1	6.88755e-10	1.23792	PARP11	0.00222996	0.347189	FBXO42	0.000808019	0.52381	TBXAS1	3.95392e-14	0.699935	IL12RB1	2.01724e-18	1.0761	ADCY7	3.96419e-15	0.701801	REXO2	3.53839e-07	1.10151	LY9	5.40824e-05	0.360187	CD59	1.22259e-19	0.492391	ZNF830	2.51572e-13	0.918569	LENG8	5.07724e-14	0.658909	C12ORF57
9.31662e-05	0.536889	HLA-DQB2	1.43175e-07	0.465463	THYN1	5.75432e-05	0.335774	CSNK1D	1.95776e-05	0.335394	GPR174	7.21822e-10	1.27388	ZNF766	0.0022306	0.374692	YY1	0.000811835	0.430107	SOS2	4.43177e-14	0.950781	SKAP2	2.03758e-18	0.805449	PCDH11X	3.99976e-15	0.580921	ATP5G3	3.64501e-07	0.631015	DUSP22	5.5188e-05	0.896005	SERPINB1	1.23762e-19	1.08688	TMEM220	2.65783e-13	0.498592	RPS14	5.4523e-14	0.959532	EPAS1
9.62044e-05	0.93685	NBPF15	1.46616e-07	0.576668	WDR45	5.84154e-05	0.312645	PATJ	1.98208e-05	0.494796	METRNL1	7.81865e-10	0.646946	ZNF549	0.00238509	0.522436	CCDC97	0.000827846	0.265531	RAB37	4.87197e-14	0.781454	MCM5	2.09523e-18	0.815342	FGF13	4.65296e-15	0.564849	JTB	3.87499e-07	0.830165	PAPD7	5.54483e-05	1.12974	SSFA2	1.31479e-19	0.482418	LPXN	2.70325e-13	0.635928	TARS	6.75719e-14	2.84126	IFI27
9.80234e-05	0.70878	INPP4B	1.46624e-07	0.538887	LTBP4	5.98853e-05	0.388812	SPECC1	2.11722e-05	0.395928	HM13	7.96867e-10	0.669371	2022-09-06	0.00248912	0.322743	ADHFE1	0.000901999	0.639881	ARL14EP	5.14808e-14	0.35714	SKAP1	2.57874e-18	1.852	ZNFX1	4.81323e-15	0.272524	DPAGT1	4.04464e-07	0.580376	ILF2	5.64079e-05	0.576024	TBC1D5	1.33407e-19	0.608234	ADGRE2	3.38296e-13	0.768583	TRNT1	7.01808e-14	0.707334	ACAA2
0.000100234	0.429384	CTCFL	1.46687e-07	0.411821	ACP1	6.28503e-05	1.20617	LAMA4	2.20415e-05	0.370821	CCDC125	8.03742e-10	0.575231	PXN	0.00259504	4.06942	GFOD1	0.000938087	0.328709	JAKMIP1	5.17308e-14	0.901983	CNIH1	2.68592e-18	2.044	TRIM56	5.03595e-15	0.343677	PDE11A	4.62576e-07	0.711633	GOLGA8B	5.69216e-05	0.857052	MECOM	1.58548e-19	1.20269	SIK1	3.42279e-13	0.975112	NPEPL1	7.68693e-14	0.835606	B3GNT7
0.00010216	0.813798	WFDC1	1.55393e-07	0.646519	PCNT	6.522e-05	0.26274	GRAMD1A1	2.20958e-05	0.363144	2022-09-02	8.17449e-10	0.922054	DNMT1	0.00272471	0.562361	TNFAIP8	0.000993172	0.314353	PLEKHA1	5.2367e-14	0.422841	NBEAL2	2.761e-18	1.60989	LINC01133	5.65928e-15	0.613481	PRELID1	4.63038e-07	0.313404	CYB5R3	5.94948e-05	0.572347	PTPRE	1.63122e-19	0.366457	SRP14	3.48908e-13	0.521398	RPS9	9.50993e-14	0.315686	TPI1
0.000104161	0.373988	RILPL2	1.64781e-07	0.480401	PCSK7	6.64789e-05	0.522963	BLZF1	2.32684e-05	0.514085	SRGAP2C	9.11983e-10	0.577146	CNN2	0.00272678	0.636616	BORCS5	0.00102055	0.368019	ZNF267	5.46451e-14	0.602992	LAP3	2.94318e-18	2.34042	RNF44	6.5359e-15	7.97769	SMPDL3B	4.65938e-07	0.941215	PRDX2	5.98561e-05	0.614308	CCDC66	2.09694e-19	0.541123	MLF1	3.56394e-13	0.589654	FAM114A1	1.02808e-13	0.253138	MECOM
0.000104699	0.973215	GCH1	1.70668e-07	0.629033	ARHGAP29	6.69071e-05	0.942179	HSPA21	2.36396e-05	0.293922	YIPF3	9.35039e-10	1.40587	KLHL3	0.00278246	0.484541	SLC31A1	0.0010691	0.768167	CRACR2A	5.60336e-14	0.579458	NDUFC1	3.27046e-18	2.17478	METTL8	6.57662e-15	0.58028	APOL1	4.79084e-07	0.272481	SNU13	6.03495e-05	0.396876	LYPLA1	2.52817e-19	0.926688	SLC35D1	3.57307e-13	0.333034	BRD2	1.14705e-13	0.639607	APH1B
0.000106267	0.268905	CCDC127	1.82248e-07	0.324817	MCRS1	6.8924e-05	0.614612	DXO	2.44895e-05	0.391628	ACOT2	1.13609e-09	0.469054	HMGN2	0.00285511	0.570713	NCOA7	0.00108188	0.365136	CRY1	5.89135e-14	0.867262	YIPF6	3.27854e-18	1.04973	RBM39	7.46142e-15	0.765414	TNFRSF9	5.46616e-07	0.304005	CKS2	6.11336e-05	0.47407	LRG1	2.55182e-19	0.287164	TUBA1B	3.76912e-13	0.29687	HAT1	1.15171e-13	0.259728	SDHD
0.00010662	0.679589	RIC3	1.96634e-07	0.326052	SCAMP2	6.95175e-05	0.257877	EVL	2.46125e-05	0.301699	CLPX	1.17538e-09	1.22852	XPA	0.00293662	0.631133	BRIP1	0.00113017	0.59201	EFR3A	5.93115e-14	0.56394	PRDX3	3.3821e-18	0.569087	SLC24A2	7.52661e-15	0.652334	SAT2	5.51712e-07	0.606287	NIPSNAP3A	6.1471e-05	1.44975	TOM1	2.62603e-19	0.331676	TAF7	3.80654e-13	1.25794	ARHGAP9	1.17268e-13	1.27203	ADTRP
0.000108627	0.429033	TCL6	1.96681e-07	0.302575	RPL22	7.19543e-05	1.25698	CCL3L3	2.46951e-05	0.356682	HMGN2	1.23388e-09	1.51958	RABL2A	0.00296011	0.622563	NASP	0.00120026	0.484919	PXN	5.96337e-14	1.42457	FAM19A2	3.71517e-18	3.18205	DAPK2	8.28684e-15	0.631348	TECPR1	5.59847e-07	0.330527	MOB1A	6.17471e-05	1.27575	AKAP6	2.69295e-19	0.373758	RALB	3.8121e-13	1.37742	CCDC88B	1.52748e-13	0.526762	RPL23AP82
0.000109898	0.333868	PPP1R15B	2.02767e-07	0.608599	CBX6	7.71993e-05	0.255085	CCDC85B	2.57361e-05	0.512952	SEC14L1	1.43682e-09	0.797018	SYTL1	0.00303743	0.74553	GMDS	0.00122523	0.294459	TES	6.57145e-14	0.556961	WSB1	3.80572e-18	0.933072	FAM117B	9.05939e-15	0.915298	MTHFD2	5.67094e-07	0.524927	HN1	6.37302e-05	1.29314	SPACA6	2.99585e-19	0.49922	PPP2CA	4.13635e-13	0.651269	C15ORF38-AP3S2	1.88481e-13	1.02932	S1PR2
0.000112445	0.682056	ZNF530	2.03658e-07	0.6966	SPDYE5	7.90715e-05	0.353036	MYO9B	2.85883e-05	0.280649	RNF7	1.5829e-09	0.872842	SUPT3H	0.00304752	0.421874	ZEB1	0.00129719	0.321669	PPP1R18	6.69623e-14	0.587958	GRN	3.82956e-18	2.78376	CDCA7L	1.1807e-14	0.706796	SHMT2	5.93599e-07	0.517111	MAGOHB	6.42245e-05	0.27516	ARMCX3	3.04482e-19	0.321842	TMX4	4.27934e-13	0.985874	RALGAPA2	2.44654e-13	0.436578	KIF16B
0.000114179	0.635011	CDC37L1	2.04191e-07	0.54983	KCNA3	8.00767e-05	0.469539	DCTN4	2.93376e-05	0.270065	UQCRH	1.58476e-09	0.932237	CRLF3	0.00306307	0.414109	GNAS	0.00134353	0.723382	CXCR4	7.33657e-14	2.15558	CLNK	3.84792e-18	0.691882	NEDD4	1.24836e-14	0.682214	COPZ1	5.99187e-07	0.523672	ST8SIA4	6.42816e-05	0.707764	BCAT1	3.38435e-19	0.534556	BTBD19	4.40243e-13	0.919759	ZCCHC6	2.5917e-13	0.354443	INF2
0.000117831	0.691102	CYP4F8	2.12731e-07	0.305909	TANGO2	8.09001e-05	0.35299	TRAPPC6A	2.9877e-05	0.697968	BOC	1.82215e-09	1.10011	IGSF8	0.00312562	0.460821	SLC25A3	0.00134861	0.402298	ARRDC2	7.55533e-14	0.70499	CALU	4.18949e-18	1.19961	NEK6	1.30372e-14	2.89345	ST7	5.99845e-07	0.335706	PUF60	6.46641e-05	0.731618	GBP1	4.36411e-19	0.254322	CUTA	4.45176e-13	0.269044	ATP6V1H	2.73624e-13	0.515712	ISG15
0.000119298	0.715825	STAG3	2.15938e-07	0.474893	LINC00667	8.36575e-05	0.36398	TPMT	2.99407e-05	0.295088	TMEM14B	2.1196e-09	1.22804	SEMA4D	0.00317388	0.471419	GNB5	0.00140651	0.394967	DYRK2	7.81191e-14	0.459639	CORO1A	4.31618e-18	2.96377	ZNF793	1.42556e-14	1.99106	PALM2-AKAP2	6.13962e-07	0.46566	COA4	6.50717e-05	0.666638	TRAPPC11	4.41279e-19	0.747858	MAPRE2	4.62244e-13	1.48405	NOTCH2NL	3.19074e-13	0.528476	ENOSF1
0.000119668	0.288228	POLR3E	2.21922e-07	0.481774	POTEC	8.68478e-05	0.717999	A1BG	3.2995e-05	0.524703	MED28	2.14613e-09	0.940726	AGGF1	0.0031999	0.405921	ZNF281	0.00151208	0.487043	TP53I13	7.99209e-14	0.381392	RAC2	4.4706e-18	1.05146	RPAP2	1.50759e-14	0.740817	NDUFAB1	6.17314e-07	0.373021	HSPB11	6.66695e-05	0.513065	PPM1A	4.48772e-19	1.7466	AP1S3	4.66475e-13	1.29231	FYN	3.35425e-13	0.427432	SMIM12
0.000122998	0.91676	PIAS21	2.23016e-07	0.385949	DENND4C	8.87034e-05	0.44016	ZMIZ1	3.34233e-05	0.369601	TMEM205	2.15347e-09	1.05346	FAM228B	0.00341626	0.664061	IFT57	0.00151656	0.306495	METTL9	7.99405e-14	0.702213	NABP1	4.78351e-18	1.18104	SRSF5	1.61257e-14	1.15803	ABHD14A	6.18363e-07	0.52015	RPS27	7.46378e-05	0.584631	P2RX4	4.55361e-19	0.364962	RPL5	4.67849e-13	0.466397	RPL21	3.81874e-13	0.987819	APLP1
0.000124991	0.4759	SLBP	2.31683e-07	0.352684	FBXL5	9.06472e-05	0.263672	TMEM147	4.08555e-05	0.494763	SEMA4D	2.19134e-09	1.27331	TBRG4	0.0034654	0.38287	PLPP5	0.00153084	0.866225	FAM102B	1.08005e-13	0.421906	ARL6IP5	4.79224e-18	2.20085	ARL10	2.00443e-14	1.19249	PSMC3	6.40749e-07	0.400218	CCDC94	7.50333e-05	0.31546	NONO	4.60236e-19	0.803754	PLGRKT	5.14179e-13	1.44636	BST1	5.3769e-13	0.53072	SC5D
0.000127223	0.56061	RGPD8	2.44812e-07	0.833512	MYO6	9.10705e-05	0.261007	TMED10	4.11061e-05	1.83663	PDGFA	2.1952e-09	2.20015	SERPINB6	0.00346879	0.507027	TMEM156	0.00169259	0.393234	PBDC1	1.4371e-13	0.302096	CD4	5.11497e-18	4.02948	CHI3L2	2.15728e-14	0.885277	SQSTM1	6.53801e-07	0.424242	NCOA7	7.56107e-05	1.4331	CNN3	4.74739e-19	0.553458	SLC44A2	5.46609e-13	0.512468	CAPN15	6.04008e-13	1.15947	FN1
0.000127403	0.577151	PTBP2	2.58072e-07	0.306963	SAMD9L	9.1654e-05	0.96555	SMG6	4.13693e-05	0.372623	ST8SIA4	2.26782e-09	0.618157	RBL1	0.0035831	0.30855	HUWE1	0.00171253	0.552511	RANBP17	1.7329e-13	0.467708	MRPL33	5.30703e-18	1.53438	ZSCAN30	2.28252e-14	0.610081	RHEB	6.67629e-07	0.305763	SPINT1	7.58668e-05	0.957155	EARS2	5.94967e-19	0.283279	MRFAP1	5.47131e-13	0.729348	BCDIN3D	7.26041e-13	0.258921	RB1
0.000133125	0.296375	FAM110D	2.75846e-07	0.49511	NDUFS2	9.74247e-05	0.292283	SKIL1	4.47337e-05	0.36259	PNKD1	2.56189e-09	1.29447	EPHA1	0.00365354	0.305324	LINC00937	0.00176044	0.361635	HTATSF1	1.73753e-13	0.736522	SLC1A5	5.42867e-18	1.12251	NCF1C	2.36797e-14	0.252344	SULT1B1	7.10433e-07	0.380266	SERPINB9	8.74983e-05	1.47294	JARID2	7.40007e-19	0.527358	EXOSC8	5.79345e-13	0.901742	PKN2	7.84069e-13	0.274514	GZF1
0.000133925	0.459665	PHF1	2.96808e-07	1.80622	SBK1	0.000106723	0.275161	PPP2R2A	5.25098e-05	0.534752	STAM1	2.5749e-09	0.763001	LINC01002	0.003696	0.352549	BCL2L11	0.00177276	0.847123	RAB24	1.74538e-13	0.530464	B3GNT2	5.95392e-18	0.737017	ICA1L	2.64451e-14	1.39521	SPTY2D1	7.17546e-07	0.385713	CD52	8.74988e-05	1.02362	DPH1	7.42473e-19	0.395306	ALG13	6.13114e-13	0.82596	EDEM2	1.01285e-12	0.348256	ZFP36L1
0.000135546	0.262165	SLC1A6	3.16818e-07	0.568166	ITFG2	0.000108586	0.342322	CAST	5.33327e-05	0.278657	MAPRE2	3.06885e-09	0.902615	MCM7	0.00371891	0.382631	ITK	0.00179284	0.566014	IFT57	2.01798e-13	0.580603	RHOF	6.21668e-18	5.44533	LGALS9	2.67192e-14	0.374032	ITIH5	8.4367e-07	0.560675	MRC1	8.82489e-05	1.43092	QPCTL	1.38141e-18	0.257103	IST1	6.69221e-13	0.484637	PSMB5	1.05917e-12	0.562365	TSPAN33
0.000136375	0.443482	SNHG5	3.32521e-07	0.37615	NUSAP1	0.000110837	1.33234	MYC	5.70029e-05	0.744557	BCAS41	3.12209e-09	1.0573	MAP3K7CL	0.00372214	0.517611	JMJD1C	0.00182159	0.617053	ARHGEF7	2.08276e-13	0.287309	DESI1	6.48348e-18	2.14225	RUNX1	2.89331e-14	3.38662	CERCAM	8.97945e-07	0.609986	GPR137B	8.86458e-05	0.836122	MIF4GD	1.41777e-18	0.291889	LMNB1	7.64362e-13	1.16602	C20ORF27	1.30048e-12	0.718844	FDFT1
0.000137786	0.667974	ZNF532	3.56712e-07	0.496791	PNKD	0.000115125	0.259748	TUBA1C1	6.33411e-05	0.834596	NCF41	3.16587e-09	1.95566	PPIAL4G	0.00372396	0.337244	CNIH1	0.00183087	0.441902	PRMT9	2.20006e-13	0.38233	C20ORF24	7.20457e-18	1.40783	POLE	3.90739e-14	6.48686	ITGA8	9.15408e-07	0.420134	INSIG1	8.90128e-05	0.355829	RNASEH2C	1.49326e-18	0.970648	POLR2A	7.78783e-13	0.324546	CHCHD3	1.46517e-12	0.800995	PCNA
0.000139697	0.402	MTFP1	3.63431e-07	0.407613	LSM6	0.000117944	0.589247	LTBP3	6.89377e-05	0.2635	SMIM19	3.2723e-09	0.789261	WDR89	0.00374724	0.430841	RASA1	0.0018398	0.496663	PTPRE	2.69139e-13	0.596902	MT2A	7.54019e-18	0.952913	NDUFS6	4.03739e-14	1.49272	FBXO18	9.60598e-07	0.382691	COMMD10	9.62945e-05	0.945887	TMX3	1.5472e-18	0.501505	PMF1-BGLAP	8.40505e-13	0.296535	PRELID3B	1.49545e-12	1.47618	SLC16A1
0.000145088	0.313776	RNF149	3.69541e-07	0.260052	APBB1IP	0.000132328	0.327171	FAM177A11	7.03263e-05	0.690979	PMAIP11	3.3264e-09	0.283932	MYL12A	0.00376405	0.392857	ZHX2	0.00202249	0.659975	VAMP4	2.76304e-13	0.661506	ICAM1	7.55179e-18	1.58816	MGEA5	4.32905e-14	0.410817	CDV3	9.63439e-07	0.460848	LGALS9	9.69835e-05	0.538982	SGSM3	1.83537e-18	0.315392	MUM1	8.94179e-13	0.430774	C10ORF11	1.54994e-12	1.16395	MACC1
0.000148084	0.28265	KLHL21	3.87748e-07	0.469062	LAMTOR4	0.000132836	0.371701	PIP4K2A	7.36557e-05	0.35287	ABCA2	3.48184e-09	1.29005	RRP7BP	0.00381339	0.911717	ZFP90	0.00205066	0.345853	TM9SF3	2.84511e-13	0.640052	CCDC50	8.03145e-18	0.831951	RPL17	4.50094e-14	0.540182	GMDS	9.70188e-07	0.655165	ACAP1	9.87327e-05	0.52294	SREK1	1.85174e-18	0.419832	OSTF1	8.94919e-13	1.06993	LRMP	1.9747e-12	0.297626	PBDC1
0.00015041	0.638108	RNF103	4.21419e-07	0.31061	MAT2B	0.000135204	0.28155	ENSA	7.37946e-05	0.265614	MZT1	3.53915e-09	1.67125	ZSCAN18	0.00384525	0.258331	ZCCHC11	0.00205537	0.404387	E2F4	2.95059e-13	0.454276	SEC11C	8.18072e-18	0.790117	PCDHGA8	4.95462e-14	0.555371	LMNA	9.78417e-07	0.466958	SHMT2	9.87734e-05	0.67113	LRRC2	1.91836e-18	0.886671	PVT1	9.66314e-13	1.84556	ATAD1	2.03724e-12	0.275747	ARHGAP12
0.000152791	0.328298	PABPN1	4.37138e-07	0.485667	CD244	0.000135893	0.914787	ASNS	7.39667e-05	0.497571	STARD4	3.74846e-09	1.02105	SPEF2	0.00388915	0.699951	MTMR6	0.00211135	0.574903	PLIN2	3.02661e-13	2.59428	PLA2G4C	8.32461e-18	0.929793	STARD9	5.09566e-14	2.3768	PRADC1	1.04257e-06	0.738087	MAN1A1	0.000100626	0.730493	BIRC3	2.07405e-18	0.564695	KREMEN1	9.83004e-13	0.444299	UTS2	2.05477e-12	0.742729	FBP1
0.000158789	0.395314	FBXO321	4.81029e-07	0.756028	TMEM181	0.000137021	0.310863	NCALD1	7.85815e-05	0.369396	N4BP11	3.77741e-09	0.299117	SNHG5	0.00389431	0.388782	MYLIP	0.0021531	0.439584	TBC1D10A	3.41662e-13	0.647119	PAK2	8.40677e-18	0.999744	ACAP1	5.11098e-14	0.362257	ZNF706	1.13707e-06	0.683594	DANCR	0.000101839	0.323347	CHD2	2.57203e-18	0.524512	LINC00964	1.01427e-12	0.425327	PARP1	2.07549e-12	0.815209	PCED1B-AS1
0.00015895	0.3378	ERC1	4.91286e-07	0.408341	PPP1R7	0.000142686	0.353613	RAPGEF6	8.11166e-05	0.363958	CD2BP21	3.94536e-09	0.941567	UBIAD1	0.00391057	0.377325	MYO5A	0.0022527	0.719492	FOS	3.47745e-13	0.663782	TRPC4AP	8.65731e-18	1.08898	NFKBID	5.35196e-14	0.594809	NDUFA11	1.16489e-06	1.56607	IDO2	0.000109121	0.416963	ZNF695	2.68134e-18	0.531341	ACD	1.02487e-12	0.358276	FNDC3A	2.09699e-12	1.06531	TCOF1
0.000163813	1.27308	LPAR3	5.47809e-07	0.903535	PPOX	0.000151632	0.732933	ZSCAN18	8.35833e-05	0.528652	STIP1	4.02846e-09	0.782216	NIN	0.00404496	0.578662	HERC1	0.00225321	0.302468	CD44	3.65598e-13	0.707301	PSMA6	8.76716e-18	1.69085	CAMK1D	5.58054e-14	1.21306	PLA2G16	1.22191e-06	0.301122	RPL41	0.000114744	0.346144	DENND1B	2.77391e-18	0.542201	YWHAQ	1.02849e-12	0.800322	TIMMDC1	2.1228e-12	0.632651	GEM
0.000163981	0.273432	FAM60A	5.77456e-07	0.262518	AP2M1	0.000160057	0.471142	ANKRD371	8.4598e-05	0.600885	PLIN2	4.06464e-09	1.76026	CASP10	0.00405961	0.395884	ITGAE	0.00231981	0.610146	CDC16	3.69662e-13	0.502648	JAK1	9.00425e-18	0.664245	MT-ATP8	5.75416e-14	0.722793	SLC25A4	1.25264e-06	0.365301	PHB2	0.000119681	0.294484	ALOX5	2.82829e-18	0.598202	DAZAP2	1.0712e-12	0.286513	CD79B	2.57429e-12	0.398731	MRPL18
0.000168664	0.46181	LYSMD3	6.50874e-07	0.317493	RNF167	0.00016154	0.361449	SRSF6	8.74574e-05	0.433068	HLTF	4.06649e-09	0.81723	ZZZ3	0.00406003	1.43454	GLA	0.00232231	0.472038	ATF7IP2	3.85401e-13	0.56211	HADHB	9.44658e-18	0.623003	RPL3	7.12235e-14	2.24584	GPR180	1.25816e-06	0.790707	PRPF31	0.000121126	0.464887	ERGIC2	2.83876e-18	1.64791	SOX5	1.13424e-12	0.281262	AMPD2	3.14868e-12	0.935519	CTNS
0.000170944	0.535942	CD5	6.74619e-07	0.657494	HSPB11	0.000163748	0.552744	MFSD4B	9.32759e-05	0.347738	TWF21	4.28738e-09	0.831932	CYB561D1	0.0040612	0.760842	PHF12	0.00233842	0.303774	PLOD3	3.99774e-13	0.592876	TBK1	9.54016e-18	1.1687	IL6ST	8.99396e-14	0.769677	ASAH1	1.33197e-06	1.73646	FCMR	0.000121887	0.486004	TNFAIP8	3.07236e-18	1.70695	GCNT4	1.16058e-12	0.370385	RBM47	3.41862e-12	1.11032	ZFHX3
0.000171381	0.371064	LRRC34	7.07e-07	0.5341	MTIF3	0.000168475	0.318107	ST3GAL1	9.93979e-05	0.494808	CASP21	4.31224e-09	0.641532	BTN3A2	0.00408453	0.934569	APOBEC3F	0.00254142	0.613088	ITM2C	4.06474e-13	0.553112	PSMD11	1.12297e-17	1.66394	ARID1B	9.63751e-14	2.76889	METTL21EP	1.57853e-06	0.573165	ETFB	0.0001226	0.351534	RNF7	3.82508e-18	0.539323	PARVB	1.16381e-12	0.514894	HSD17B4	3.49095e-12	0.547593	MOCS2
0.000178458	1.1501	EPHA1	7.24426e-07	0.410695	MRPL40	0.000171437	0.464637	RPS10-NUDT3	0.000103035	0.283714	PSMC2	4.77136e-09	0.877052	FAM134B	0.0041018	0.391914	FOXN2	0.00259522	0.680754	ANO6	4.11114e-13	0.541867	TBCB	1.1319e-17	2.57796	RASSF3	1.13872e-13	0.639664	REV3L	1.70341e-06	0.356067	KLHL5	0.000126076	1.08936	AFF1	4.28629e-18	0.380595	DDX39A	1.21523e-12	0.320033	TMEM147	3.70362e-12	0.744843	F11R
0.000180225	0.253312	ATXN1	7.26467e-07	0.366402	KLF12	0.000172533	0.291452	CTNNB1	0.0001031	0.524929	LTV1	4.94875e-09	2.60739	CD8B	0.00415401	0.251566	CHD7	0.00261061	0.419256	ATP11B	4.26748e-13	0.506959	ANTXR2	1.15566e-17	2.04381	SPECC1	1.18963e-13	0.27935	MRPL53	1.77033e-06	0.31315	PEBP1	0.000126845	1.68279	TPRA1	5.62084e-18	1.58089	CLNK	1.2997e-12	2.00065	DHX57	4.04622e-12	0.636918	LINC00116
0.000186054	0.522909	CHDH	7.2995e-07	1.34814	WDR77	0.000174983	0.55806	GABRE1	0.000107714	0.305168	WDR1	5.16874e-09	0.717676	LRCH4	0.00422264	0.610876	SMCHD1	0.00267631	0.442556	SEC22C	4.35731e-13	0.441222	PRDX5	1.16855e-17	1.62743	ZNF320	1.67842e-13	1.23232	ALG1	1.77699e-06	0.503485	PMS2P1	0.000128122	0.460284	R3HDM2	6.72438e-18	0.430067	HEXIM1	1.33914e-12	0.759339	CYFIP1	4.35094e-12	0.603872	ANKRD22
0.000195364	0.301781	ZFAND2A	7.33686e-07	0.416316	ERP29	0.000176444	0.501908	SAG	0.000112092	0.269924	TKT	5.17725e-09	2.1203	ZFP14	0.00433449	0.907018	CEP112	0.00268344	0.29256	NSL1	4.491e-13	0.441717	DYNLRB1	1.20966e-17	1.99823	ANKRD13A	1.70411e-13	1.21337	FAM98A	1.78569e-06	1.20318	HEATR5B	0.000130136	1.22162	FIP1L1	6.92649e-18	0.725501	PHYH	1.35614e-12	1.18436	NCEH1	4.79925e-12	1.38031	MDC1
0.00019725	0.454415	PLXNA3	7.48165e-07	0.43205	SFT2D2	0.000176912	0.683422	CRACR2A	0.00011652	0.265511	PGD	5.18073e-09	0.860985	OLMALINC	0.0043923	0.307085	ATF4	0.00283015	0.294606	KIF22	5.16552e-13	1.23354	CAMK1	1.32296e-17	1.6126	NCF1	1.72639e-13	1.05453	PELI1	1.97257e-06	0.937421	QDPR	0.00013291	0.330121	EDEM1	1.02394e-17	0.396645	FAR2	1.38096e-12	0.276119	IST1	5.22946e-12	0.395661	MOB1A
0.000202261	0.524241	GLS	7.5879e-07	0.580279	HERC3	0.000177747	0.37068	DBN1	0.000121103	0.365792	MRPL33	5.1937e-09	1.41435	ZNF397	0.004451	0.642587	ATP8A1	0.00284742	0.55073	EFHD2	5.24715e-13	1.69697	RGPD1	1.5895e-17	1.86307	PARP14	1.79102e-13	0.472966	TMEM179B	1.98897e-06	0.352073	ABCF2	0.000132946	1.12012	ETV6	1.0541e-17	0.714207	GSTM2	1.47983e-12	0.611488	RPS28	5.50495e-12	0.633361	TMEM33
0.000204615	0.382877	USP38	7.64581e-07	0.311143	ZNF480	0.000185044	0.483751	TMOD3	0.000122394	0.427917	TSEN2	5.23777e-09	0.618821	SYNE1	0.00454453	0.407404	STRBP	0.00293042	0.320178	SYVN1	5.29601e-13	1.74965	LAT2	1.81049e-17	1.95044	POU2F2	2.06715e-13	1.45882	AHNAK	2.02709e-06	1.05192	NREP	0.000133676	0.39051	LRPAP1	1.30655e-17	0.593257	WIPF2	1.52116e-12	1.38236	HIST2H2AC	5.66729e-12	0.558949	ICAM4
0.000218366	0.557441	DDX23	8.15246e-07	0.446923	ANAPC5	0.00019187	0.365851	ATP6V0A1	0.00012352	0.699346	ETS1	5.48435e-09	0.750407	CEACAM21	0.00456387	0.449246	ACSM2A	0.00293789	0.329498	TMEM43	5.76243e-13	0.430689	TMX1	1.83902e-17	1.1602	CD55	2.142e-13	1.44152	EXPH5	2.03464e-06	2.38388	CCND1	0.000137189	0.316285	PARVG	1.31058e-17	0.320523	HBS1L	1.59009e-12	0.390873	CYLD	7.33648e-12	0.285712	PPARG
0.000219387	0.598758	NABP1	8.17187e-07	0.412114	SUPT4H1	0.000193126	1.08672	RNF215	0.000140806	0.57615	KIAA1671	5.78573e-09	0.545732	HCAR1	0.00457986	0.346357	2022-03-03	0.00296961	0.35119	ILK	6.30294e-13	0.355103	COMMD3-BMI1	1.8664e-17	1.32348	CACNA1A	2.18228e-13	0.368656	PSMD8	2.28949e-06	1.46079	TBC1D4	0.000138823	0.365197	IFI30	2.29886e-17	0.387259	EIF4H	1.71308e-12	0.403937	DARS	7.42065e-12	0.448824	SPTY2D1
0.000221807	0.27031	GSTM3	8.69903e-07	0.261891	TMEM230	0.000194682	0.322869	DUSP22	0.000140836	1.53502	RGS9	5.89349e-09	0.895917	HMGN3	0.00462987	1.2434	GALNT1	0.00302734	0.511607	KIDINS220	6.38097e-13	0.582444	STARD7	2.03272e-17	2.86715	AKNA	2.49829e-13	0.683525	IFI27L2	2.43237e-06	0.255952	KIAA0825	0.000139438	0.997124	FAM49A	2.3257e-17	0.744253	EIF1AX	1.77538e-12	0.360566	TSTD1	8.45791e-12	0.341508	NTPCR
0.000224458	0.434411	PAPOLG	9.61755e-07	0.572071	VNN2	0.000200805	0.385138	ACSM3	0.000145532	0.306754	MFF	5.99315e-09	0.841393	SFI1	0.00465724	0.396117	SFXN1	0.00306738	0.634789	TNF	6.41971e-13	0.4244	ANXA7	2.04746e-17	2.72846	ZNF141	2.54003e-13	1.13712	DNAJB4	2.53917e-06	0.764434	PDIA4	0.000141325	0.40915	TCTN2	2.48456e-17	0.850598	GAS5	1.89711e-12	1.56369	KIAA0513	8.7841e-12	0.34116	SNRNP25
0.000228011	0.814229	CADM1	1.00674e-06	0.309246	PCED1B	0.000202034	0.538005	AKT3	0.000145691	0.462784	MRPL53	6.16831e-09	0.416385	CCDC40	0.00476093	0.331327	PVT1	0.00310614	0.345464	TMEM181	6.649e-13	0.433114	CHMP2A	2.10471e-17	0.902922	FOXL2NB	2.68532e-13	0.654044	DUSP6	2.71605e-06	0.280092	SATB1	0.000141739	0.875941	DAP	2.49804e-17	0.767742	CDC14A	1.95716e-12	0.349875	PSMD1	8.9902e-12	1.87942	CCDC152
0.000231142	1.18445	LYPD5	1.02401e-06	0.263017	PRELID1	0.000205215	0.411942	PYGO2	0.000147849	0.258017	AK2	6.21689e-09	1.25178	IFITM3	0.00481848	0.443621	RBM38	0.00311475	0.25254	LPAR6	7.05329e-13	1.36294	CEP120	2.27242e-17	1.95434	PBLD	2.92786e-13	0.33587	SRP72	2.73132e-06	1.14587	METTL5	0.000142334	0.507983	CSNK1G1	3.45745e-17	0.394027	CYCS	1.97553e-12	3.60322	PLD5	9.78449e-12	0.397189	APOPT1
0.000236501	0.318747	CMSS1	1.0778e-06	0.270128	GRK6	0.000207448	0.741879	MINOS1	0.000149952	0.547458	RFX5	6.44257e-09	0.941964	FKBP5	0.00485068	0.375569	CLIP4	0.00333391	0.367089	APMAP	1.02089e-12	0.510587	NPC2	2.75188e-17	1.58029	HERC1	2.98776e-13	0.748567	NAMPT	2.75141e-06	0.560003	FBXO7	0.000145651	1.17202	MGAT4C	7.80541e-17	0.744718	PROS1	2.15492e-12	0.75968	PDE7A	1.01948e-11	0.585807	SMAD7
0.00024236	0.300388	SLC3A2	1.08893e-06	0.371024	DDX58	0.00022128	0.737266	ACO1	0.000156517	0.345882	FGFR1OP2	6.64131e-09	0.768512	NHLRC3	0.00489864	0.274186	MCM6	0.00334749	0.300826	REEP3	1.02662e-12	0.790558	ADORA2A	2.91962e-17	2.08505	FBXO27	3.11849e-13	1.66516	CD320	2.8193e-06	0.370341	ARMC6	0.000149377	0.482317	DCAF5	8.55359e-17	0.319597	CELF2	2.26886e-12	0.997892	N4BP2L2	1.03651e-11	1.96795	RCC1
0.000245553	0.735677	TLE4	1.11507e-06	0.532824	AKR7A2	0.000231439	0.320847	PRKD3	0.000160489	0.555687	GINS2	6.71782e-09	0.991715	ZNF480	0.00491731	0.937826	SMC5	0.00342324	0.874896	CD2AP	1.0962e-12	0.337141	S100A10	2.97148e-17	1.58943	FAM159A	4.48348e-13	2.2584	APOL2	3.34516e-06	0.381212	TBL1XR1	0.000151294	1.53532	EML4	8.67208e-17	2.15246	CTSW	2.3382e-12	1.0986	OGFR	1.08272e-11	0.319192	SCCPDH
0.000246239	0.523888	PPIL4	1.23907e-06	0.662821	GBP3	0.000233023	0.361272	IER5	0.000169202	0.778883	GFI1	6.83349e-09	0.322696	MT-ND4	0.00502522	0.741142	TRERF1	0.0034926	0.393177	MSH3	1.12023e-12	0.596019	FYCO1	3.14568e-17	0.770518	ZNF382	4.90992e-13	0.597122	ICAM3	3.52989e-06	0.622408	MRPL36	0.000153538	0.814866	LINC01125	9.33487e-17	0.272557	RGPD6	2.35895e-12	0.346841	MYOF	1.24089e-11	0.399379	G6PC3
0.000248337	0.288851	SOD2	1.30296e-06	0.733813	POP4	0.000236102	0.430958	ANO9	0.000170388	0.299175	NBEAL1	6.84148e-09	0.957318	ZNF815P	0.00510556	0.491538	GGA2	0.00367292	0.325914	COMMD8	1.25239e-12	0.486705	SIT1	3.1767e-17	2.89412	IL1RAP	5.39738e-13	2.28059	ID2	3.71983e-06	0.480173	SCML1	0.000154178	1.41161	NTRK3	1.21815e-16	0.258479	HNRNPA2B1	2.38366e-12	0.610559	TLE4	1.25504e-11	0.918197	SESN2
0.000249755	0.864634	DNAJC18	1.35013e-06	0.637287	METTL3	0.000238405	0.285148	RBMX	0.000174771	0.356853	MPC2	6.97252e-09	1.76191	TSPAN32	0.0051562	0.319669	AZIN1	0.00379654	0.439504	YIPF5	1.30762e-12	0.896099	NCK2	3.22885e-17	1.44187	RB1	5.75014e-13	0.828407	PAAF1	3.93026e-06	0.482636	TSEN34	0.000154395	0.477122	LSM2	1.44216e-16	0.372091	NEK6	2.38493e-12	0.373024	NDUFS5	1.39011e-11	0.542332	FTH1
0.000253001	0.86222	TCF71	1.36393e-06	0.390386	FBXO32	0.000241653	0.416363	NDRG3	0.000174991	0.265462	NMI1	7.26757e-09	0.826639	C1QBP	0.00516111	0.356313	SNRPB	0.00385937	0.947441	RGS9	1.41875e-12	0.597605	ZFAND5	3.38239e-17	4.69735	MYO1E	6.39625e-13	5.69229	CADM1	3.98199e-06	0.71564	RAB29	0.000154796	0.968671	LINC00641	1.50222e-16	0.342672	NUDC	2.41965e-12	2.53155	DYSF	1.56216e-11	0.283118	COMMD5
0.000262078	0.468196	HYOU1	1.51127e-06	0.605665	AAK1	0.000243789	0.342684	KIAA1161	0.000184586	0.611068	TMEM87B	7.34438e-09	1.36162	ZC3H6	0.00517088	0.300043	SAP18	0.00390792	0.749866	PKP2	1.5867e-12	0.450433	TPM4	3.50465e-17	3.84153	MARCKSL1	6.46755e-13	7.57196	HPGD	4.43086e-06	0.263543	RRP15	0.000159671	1.07609	PITPNA	1.65397e-16	0.736814	ISOC1	2.43186e-12	0.560835	SMARCB1	1.72655e-11	0.4911	TMEM19
0.00026446	0.400135	REV3L	1.51544e-06	0.715291	TUBB	0.000255497	1.36985	SIRPB1	0.000187206	0.289962	PPP2R5D	7.37706e-09	0.781483	DDX39B	0.00526273	0.716209	SF3A1	0.00395838	0.38322	TSEN15	1.64289e-12	0.364845	SGMS1	3.64282e-17	0.678736	RABGAP1	6.55569e-13	0.840086	CYBA	4.51007e-06	0.312242	CRIP1	0.000164952	0.405783	CELF4	1.67556e-16	1.54255	COBLL1	2.43748e-12	1.30677	PTGIR	2.02224e-11	0.497484	PDK4
0.000265052	0.54349	TRPS1	1.57616e-06	0.279141	CD37	0.000257281	0.488664	C3AR1	0.000188635	0.426171	CXORF40B	7.39294e-09	1.44245	PLCG1	0.00534862	1.02165	PEAK1	0.00396037	0.47129	THEMIS2	1.70394e-12	0.477041	GRB2	4.14715e-17	1.0765	TRIM72	7.34158e-13	2.54553	ABHD4	4.56923e-06	0.847389	POGLUT1	0.000167086	0.703753	ARL4A	1.67821e-16	0.371612	TMBIM1	2.66024e-12	0.52186	ARPP19	2.02873e-11	0.474202	C5ORF58
0.000265386	0.593086	KLHL6	1.58911e-06	0.355355	PSIP1	0.000260818	0.269072	CDC37	0.000190989	0.379803	GNB2	7.52435e-09	2.07271	ST5	0.00543074	0.449092	PREP	0.00399209	0.436424	RGS13	1.79216e-12	0.354602	SRP14	4.19599e-17	0.873661	KIFC3	7.47945e-13	0.842699	PIK3CG	4.60952e-06	0.293624	DPM2	0.000168588	0.625848	PI4KB	1.86249e-16	0.678513	EIF2D	2.76656e-12	0.335969	SMG1P3	2.13827e-11	0.281009	SLC52A2
0.000267313	0.901412	RAB21	1.72079e-06	0.352162	C19ORF66	0.000262294	0.706891	ZBTB161	0.000191369	0.405141	CAT	7.78873e-09	0.960463	PLEKHA1	0.00543341	0.88898	ACSF3	0.0040374	0.362412	SLFN11	1.79679e-12	0.513376	COMMD3	4.25398e-17	3.55947	GNB4	9.26979e-13	0.681923	SND1	4.65841e-06	0.319019	IDH3A	0.000184687	0.720249	PTCSC3	2.25289e-16	0.632062	ANKRD42	3.13719e-12	0.338928	EXOSC4	2.57806e-11	0.442655	CD2AP
0.000270003	0.445727	PRDX1	1.80288e-06	0.327846	NUDT22	0.00026616	0.329424	LZTS1	0.000196392	0.358179	DDAH2	7.88266e-09	1.13523	ZNF680	0.00547671	0.307991	SYT16	0.00405993	1.15009	SRRT	2.08731e-12	0.707519	LMBRD1	4.35729e-17	1.54598	EIF5AL1	9.28995e-13	0.374349	C16ORF74	4.99419e-06	0.387493	UBE2J1	0.000186672	0.657052	RBM47	2.50511e-16	0.454109	TFG	3.2955e-12	1.59715	EXOC1	2.80952e-11	0.261899	GDE1
0.000274488	0.54606	SLC35E1	1.86685e-06	0.536373	LDLRAP1	0.000279031	0.540344	PNP	0.000203678	0.445395	GYS1	8.14722e-09	1.59981	CECR1	0.00548679	0.700193	C3ORF38	0.00407137	0.285133	PHF20L1	2.18074e-12	0.59132	H3F3AP4	4.45494e-17	3.38635	TCOF1	9.46282e-13	0.545593	TMEM167A	5.24074e-06	0.293455	CLDND1	0.000188627	1.17977	SKIDA1	2.58055e-16	0.350689	CDCA7L	3.4557e-12	0.610542	PTCSC3	3.33814e-11	0.37182	PDCL3
0.000275702	0.900643	KDM2B	1.92058e-06	0.737024	FANCA	0.000280682	0.31565	MAN1A1	0.000209879	0.255381	NCAPG2	8.41672e-09	1.04503	SLC7A6	0.0055173	0.559973	ATPIF1	0.00416894	0.375355	IVNS1ABP	2.22618e-12	0.395828	N4BP2L1	4.52127e-17	2.79075	CNTNAP2	9.65278e-13	0.398047	SCLY	5.72111e-06	0.406707	PSMC2	0.000189258	2.66523	GGT5	2.71666e-16	0.918831	ZSWIM4	3.76822e-12	1.01404	APLP2	3.48894e-11	0.392158	ATN1
0.000277599	0.3353	EIF2B4	1.93807e-06	0.37179	FBXO3	0.000288574	0.253972	LIPG	0.000213946	0.289583	C9ORF16	8.54773e-09	0.576404	LRPPRC	0.00559457	0.457382	POLR2I	0.00417378	0.321506	NAA15	2.33593e-12	0.310795	TRPS1	4.96285e-17	0.603994	EZR	1.01026e-12	0.425906	ZNF556	5.93434e-06	0.357039	HPRT1	0.000191768	0.628694	FABP2	2.89147e-16	0.413361	ASAH1	3.824e-12	0.987121	SNX10	6.15756e-11	0.284595	PMVK
0.000282337	0.367282	USP15	2.08135e-06	0.477729	COMMD3-BMI1	0.000288623	0.572431	MCF2L2	0.000220841	0.612118	ARL1	9.77911e-09	0.925361	CA5B	0.00565376	0.297356	RAB22A	0.00419395	0.467835	INTS6	2.37038e-12	0.587596	LAPTM4A	5.11301e-17	0.814528	WISP2	1.02855e-12	0.742219	CRYL1	6.17764e-06	0.313827	RPL36A	0.000202424	0.44276	FCGR2B	3.10887e-16	1.25192	NUP54	3.89271e-12	0.407685	FUNDC2	8.76976e-11	0.725543	SEMA4C
0.000287727	0.292569	ADAMTS2	2.15663e-06	0.667763	CHURC1	0.000291524	0.509879	SYAP11	0.000228779	0.609846	SFMBT2	1.00558e-08	0.620151	ZNF471	0.00574142	0.394206	TTF2	0.00424082	0.746727	FUT11	2.67736e-12	0.482924	LY6E	5.37651e-17	1.98456	ITK	1.06158e-12	0.797676	SLC25A46	6.55467e-06	0.96499	SMIM10L1	0.000202804	1.15798	GK5	3.11874e-16	1.05661	ZSCAN18	4.00904e-12	1.65372	CBL	9.20963e-11	0.542981	ZNF470
0.000288173	0.464288	SIAH2	2.23241e-06	0.654088	E2F3	0.000297957	0.517496	NME3	0.000234219	0.510583	AHSA1	1.02184e-08	1.26909	TTC32	0.00582785	0.378826	MLLT6	0.00425884	1.36863	KLRK1	2.90452e-12	1.12767	DUSP22	5.60011e-17	1.3649	ZNF430	1.06855e-12	0.594894	PLEKHA5	6.71991e-06	0.309384	SCIMP	0.000202851	0.401488	MRC1	3.79099e-16	0.609731	PIM2	4.18526e-12	0.851674	SRGAP2	1.1453e-10	1.08332	SLC46A1
0.000289736	0.501512	NCMAP	2.26126e-06	0.298978	DDHD1	0.00030273	0.354323	FAM212B	0.000278301	0.315621	PLEKHA5	1.03557e-08	1.02913	FBXO44	0.00601414	0.666548	DROSHA	0.00427398	0.373359	RNF11	3.71017e-12	0.303931	MIAT	6.25594e-17	3.8127	LCK	1.13563e-12	0.746481	CABP4	7.12597e-06	0.367569	SRSF1	0.000203426	1.22749	MAFF	3.96206e-16	0.924555	KCTD20	4.22427e-12	0.522375	RPL31	1.14902e-10	0.40866	CIITA
0.000310088	0.524127	GFI1B	2.27162e-06	0.745399	ZNF32	0.000304066	0.685486	ECHDC2	0.000278827	0.373381	TAF9	1.05748e-08	1.22214	ZNF506	0.00601503	0.468102	CENPI	0.00448227	0.797954	NAA40	3.72336e-12	0.788501	WDR44	6.65713e-17	1.96818	VHL	1.33156e-12	0.404742	YWHAE	7.17874e-06	0.565412	EIF2AK4	0.000206075	0.391358	SLC15A3	4.34863e-16	0.436461	RAB5A	4.60448e-12	0.297889	FAM96B	1.49767e-10	0.713176	F8A1
0.000310254	0.524417	NIPBL	2.276e-06	0.378603	RNPEPL1	0.000309511	0.429789	GPX1	0.000297859	0.259512	RNPS1	1.07208e-08	1.1663	NUP43	0.00622984	0.381615	TPCN1	0.004485	0.607156	TNFRSF1A	4.23987e-12	0.565663	VAMP5	6.88127e-17	1.41088	MAP4K1	1.333e-12	1.06864	PMM2	7.47329e-06	0.671541	UBE2K	0.000207459	0.332077	DOCK11	4.51304e-16	0.25863	RPL10	4.63104e-12	1.116	DDX17	1.67019e-10	0.683906	WDR61
0.000311474	0.345198	CLSTN3	2.31447e-06	0.294294	XKR9	0.000310162	0.502367	SLAMF1	0.000304264	0.43398	SUPT7L	1.11611e-08	0.964988	LARS	0.00623138	0.548538	USP4	0.00464065	0.319734	ZNF830	4.43446e-12	0.327044	HSPH1	7.08517e-17	0.887029	TUBGCP4	1.34738e-12	0.835649	LDHA	7.58797e-06	0.269561	GCA	0.000207845	1.3415	LINC00854	5.00543e-16	0.53692	DAD1	4.83823e-12	0.354173	S100A10	1.79284e-10	0.635374	AKIP1
0.000311964	0.505206	PPP4R3A	2.36486e-06	0.629657	HIST2H2AC	0.000322154	0.456914	TM2D3	0.000325108	0.381772	ITPRIPL1	1.11799e-08	0.839356	ZNF22	0.00623771	0.287727	KIAA1551	0.00477793	0.368931	EBP	4.45545e-12	0.478394	MRFAP1	7.46811e-17	1.72884	POLD4	1.57153e-12	1.03354	F2RL3	8.01254e-06	0.455416	FGL2	0.000213264	1.69098	UPB1	5.75784e-16	0.349743	ZNF410	4.92302e-12	0.472414	SNRPF	1.85101e-10	0.577137	TRPM4
0.00031352	0.469428	FAM129C	2.49684e-06	0.386382	CYC1	0.000342698	0.507329	SGSM2	0.000340155	0.418894	NFAT5	1.12024e-08	0.823067	RNFT2	0.0062398	0.61434	TSSC1	0.00505266	1.28656	LINC01568	5.1173e-12	0.431434	ARL6IP1	7.48471e-17	1.61362	CEP126	1.60263e-12	0.577129	TNFAIP3	8.27477e-06	0.71274	CERS6	0.000228343	0.890498	STAT5B	5.86252e-16	0.645002	UFM1	5.00639e-12	0.607578	MLEC	2.70032e-10	0.432784	APOL4
0.000316557	0.447982	RNF152	2.57517e-06	0.453136	SCOC	0.0003446	0.62681	COMMD5	0.000343078	0.255937	SLC7A6	1.22375e-08	1.08871	TTN	0.00630839	0.366846	RBBP5	0.0050567	3.12728	GAN	5.40978e-12	0.550237	SLC25A38	7.70758e-17	1.23885	ZNF100	1.65813e-12	0.986754	BET1L	8.75747e-06	0.726784	SMIM14	0.00022876	0.73115	COX7A2L	5.96499e-16	0.304419	ARL6IP1	5.02155e-12	1.00214	CALML4	3.44995e-10	0.26549	ILVBL
0.000317694	0.503166	PLEKHH31	2.7507e-06	0.999232	NUP43	0.000369007	0.413422	ICA1	0.000354933	0.774814	CHEK1	1.28267e-08	0.274258	CTSW	0.00632838	0.87759	ESYT2	0.00511603	0.462775	LRRC37BP1	5.6457e-12	0.479672	DCPS	8.3692e-17	0.999471	OPHN1	1.75345e-12	1.28245	IFI6	9.52818e-06	0.260289	SRM	0.000230812	1.296	ZNF200	6.10175e-16	0.793729	CDKN2AIP	5.13605e-12	0.27308	SUMO1	4.53938e-10	0.524014	SLC5A3
0.000318285	0.40463	SGK1	2.75325e-06	0.492045	CASP8AP2	0.000369511	0.534774	TGIF2	0.000378033	0.303504	SIRPB11	1.30968e-08	1.04975	GUSBP3	0.00639256	0.738272	PLAA	0.00527308	0.294518	SHC1	5.92248e-12	0.404794	NDUFC2	8.46272e-17	0.626393	CFAP69	1.83438e-12	1.17502	HIST2H4A	9.89641e-06	0.335171	LINC00550	0.000233142	1.3284	DUSP5	9.13738e-16	0.92613	LRCH1	5.17721e-12	0.709508	UBA5	4.75151e-10	0.409947	WDR45B
0.000320094	0.329532	ATP9B	2.82258e-06	1.13062	NCAPD2	0.000370611	0.310955	ATP6V0A2	0.000393423	0.332681	SIDT1	1.38508e-08	1.10421	EXOSC5	0.00646501	0.274751	SKP1	0.00529681	0.689815	POC1B-GALNT4	6.17249e-12	0.933065	DNAJB4	8.4663e-17	0.769206	ZNF233	1.83562e-12	0.831738	KRT18	9.91738e-06	0.707179	TMEM156	0.000238036	0.514833	RYBP	1.00794e-15	0.448668	SUMO2	5.49765e-12	0.370982	PRKACB	5.01775e-10	0.408984	MIR181A1HG
0.000324019	0.356713	IQCH-AS1	2.85627e-06	0.321418	ERAP1	0.000377923	0.458766	GRIPAP1	0.000405939	0.454137	PTPRJ	1.41245e-08	0.695159	SF1	0.00657301	0.370945	CLNS1A	0.00547393	0.37867	PDLIM5	6.17947e-12	0.363825	EDF1	8.65839e-17	2.78942	ZNF626	1.83608e-12	0.520976	DPM3	1.01542e-05	0.274055	BZW1	0.000238151	0.610501	NFKBIE	1.01078e-15	1.927	SPAG4	5.66791e-12	0.269546	TMEM154	5.28622e-10	0.508759	SCOC
0.000326143	0.656213	SPPL3	2.88437e-06	0.450669	FAM53B	0.00039008	0.53735	NAT9	0.000423778	0.559799	MCTP2	1.45335e-08	0.603538	RSRP1	0.00669046	0.888801	OSBPL8	0.00552952	0.511118	MXD1	6.36563e-12	0.780712	CASP7	8.78193e-17	1.98541	PCSK7	1.84954e-12	1.33571	FADS1	1.01629e-05	0.26905	TECR	0.000240358	1.05949	HSPBAP1	1.15997e-15	2.72137	MEIS2	6.17364e-12	1.16864	CARD8	5.88481e-10	0.279817	ARL2
0.000330256	0.394645	C6ORF48	2.90298e-06	0.524257	ANAPC13	0.000417564	0.40232	ADAMTS21	0.000451086	0.510061	ZNF414	1.51227e-08	0.681301	ORMDL1	0.00670228	0.56707	RLIM	0.00555974	0.587331	POLH	6.475e-12	0.673652	LEPROT	9.11885e-17	0.767927	PAG1	2.015e-12	2.08803	AGR2	1.08367e-05	0.47855	SSR4	0.000241724	0.752665	VPS37A	1.27142e-15	0.451195	CD37	6.24119e-12	0.866758	ICAM2	6.23084e-10	0.674098	TMEM138
0.000330531	0.340882	TECR	3.07694e-06	0.851896	ZNF785	0.000428952	0.301463	PLBD2	0.000464857	0.271905	PDE3B1	1.55351e-08	0.74474	EIF3D	0.00673588	0.264547	CCDC122	0.00560475	1.9139	KLRD1	6.55398e-12	0.481461	NOMO2	1.08453e-16	1.81791	ZNF527	2.30892e-12	1.72836	TBL2	1.08686e-05	0.301611	TMSB10	0.000243017	0.364594	CSF3R	1.28181e-15	0.385818	EPOR	6.29068e-12	1.16293	HLTF	6.52042e-10	0.566266	ARMCX6
0.00033685	0.312465	RAB9A	3.08244e-06	0.310795	MRPL34	0.000439383	0.787229	C6ORF141	0.000480484	0.452632	MYO1C	1.57179e-08	0.942967	IPCEF1	0.0067803	0.486688	ACTN1	0.00566647	0.620242	ALKBH4	7.68884e-12	1.33635	ACTA2	1.09088e-16	4.82939	SH2B3	2.44471e-12	0.536719	LAP3	1.31526e-05	0.277399	PIN1	0.000244881	0.679392	SAMD4B	1.3212e-15	0.468633	MAP4K5	6.38199e-12	2.38806	LINC00937	6.6577e-10	0.258965	SRD5A3
0.000341533	0.325379	GGCX	3.09954e-06	0.363142	MRPS34	0.000456391	0.685033	RAB3GAP1	0.000505681	0.365857	WBP1	1.57949e-08	1.14982	ZNF426	0.00688244	0.43137	POLR2D	0.00567789	0.362123	ALDH16A1	7.77353e-12	1.17707	GGT1	1.09392e-16	0.336665	LSAMP	2.45296e-12	0.403917	DHRS7	1.33456e-05	0.394891	EBNA1BP2	0.000254506	1.37599	CCL2	1.39933e-15	0.324974	OAT	7.10798e-12	0.627568	SRPRB	9.74839e-10	0.375058	SPG20
0.00034417	0.346495	ZCCHC11	3.14737e-06	0.65935	TRIM14	0.00046005	0.379241	KIAA16831	0.000512953	0.33927	BACH1	1.59812e-08	0.367949	MT-ND1	0.00691738	0.463247	MED28	0.005909	0.659874	EPG5	7.85065e-12	0.588304	CD63	1.12859e-16	0.684921	VWA5B1	2.5265e-12	0.532652	DCPS	1.36799e-05	0.543195	DCTN3	0.000259308	1.04312	PHLPP1	1.44773e-15	0.267215	CPM	7.11124e-12	0.470129	RPLP1	1.06264e-09	0.282534	LYRM2
0.000347995	0.553533	SLC25A29	3.16032e-06	0.599342	TTC9C	0.000463859	0.40992	DHX36	0.00051781	0.275442	AFTPH	1.63337e-08	1.66116	RDH5	0.00694796	0.28854	XPO6	0.00592909	0.538402	MOB2	7.86175e-12	0.813652	EIF4G3	1.15953e-16	1.52078	WDR12	2.60141e-12	0.862086	LRRC8C	1.52243e-05	0.376592	CNOT7	0.00025941	1.74189	BTG3	1.98443e-15	0.645356	CDIP1	7.54936e-12	0.951697	SCO2	1.09762e-09	0.322215	RASGRP3
0.000348671	0.658849	GNL2	3.18584e-06	0.264224	SHISA5	0.000477002	0.251287	H2AFX1	0.000542262	0.356699	L2HGDH	1.83406e-08	1.43313	CROCCP2	0.00698891	0.645264	SYT11	0.00603193	0.358977	GBP3	7.90021e-12	0.508813	DDIT4	1.16054e-16	1.16702	EPHA4	2.64482e-12	0.595252	ARHGEF12	1.62847e-05	0.507312	FSCN1	0.000265959	0.430941	FLOT1	2.08242e-15	0.940012	PAK1	7.66059e-12	0.553649	CCT4	1.12692e-09	0.322516	SLC12A7
0.000349421	0.456645	NRBP1	3.20051e-06	0.412613	NMRAL1	0.000484925	0.557562	RPS6KA5	0.000542906	0.330864	SMG1P31	1.8749e-08	1.11818	MRPS21	0.00711762	0.271172	RPL21	0.00641675	0.572901	APPL1	9.02424e-12	0.531375	ATP6V1E1	1.16373e-16	1.46854	KLHL36	2.76076e-12	1.16697	SLC7A7	1.75709e-05	0.408985	GATM	0.00026683	1.61124	GLS	2.19031e-15	0.888138	MSRB3	8.5053e-12	0.606157	CMTM3	1.35888e-09	0.47858	STX7
0.000350424	0.318057	PNRC1	3.23507e-06	0.995337	CNPY4	0.000486864	0.30397	TRIB2	0.000567351	0.291074	USP4	1.88475e-08	2.07532	PLXDC1	0.00716917	0.332652	NDUFB3	0.00650052	0.313268	HMGN4	9.18209e-12	0.475688	P2RY10	1.20713e-16	0.850126	C5AR2	3.05083e-12	1.22883	CFAP74	1.8042e-05	1.46638	STRBP	0.000269307	0.674171	LINC01299	2.24058e-15	0.566187	CNIH1	9.29045e-12	1.45404	MAPK14	1.79724e-09	0.639147	CHML
0.000355718	0.258056	BZW2	3.30889e-06	0.325849	CCNDBP1	0.000490493	0.702232	KREMEN1	0.00058286	0.255224	ZC3H11A	1.93647e-08	1.03065	LETMD1	0.00720725	0.453448	RPL32P3	0.00654762	0.922531	MGST1	9.22721e-12	0.797126	C16ORF87	1.21731e-16	0.904274	BEST1	3.18398e-12	0.506467	HLA-C	1.92168e-05	0.287798	POP4	0.000274309	0.393193	MRPL53	2.37008e-15	0.82755	SBDSP1	9.4223e-12	0.955812	TLR4	2.19849e-09	0.538388	CXCL14
0.000355976	0.691936	ZNF280B	3.49388e-06	0.289834	FAM192A	0.000490532	0.251154	UBC	0.000596386	0.285926	COA7	2.01792e-08	0.512691	C6ORF62	0.00722861	0.596163	KANSL2	0.00677942	0.611646	THAP12	9.52413e-12	0.619421	SLC43A3	1.40707e-16	1.53957	CAPZA1	3.53636e-12	0.788103	ARHGAP18	1.95297e-05	0.829695	YIF1A	0.00028327	0.324402	METTL3	2.46002e-15	1.20953	GABPB1	9.42507e-12	1.05701	OGFRL1	2.28719e-09	0.34172	HIBADH
0.000370841	0.619652	2022-03-03	3.77519e-06	0.865486	PIKFYVE	0.000496555	0.521222	TSPAN10	0.000597841	0.348703	TARS	2.08489e-08	0.553544	CIRBP	0.00725956	0.258551	RBMX	0.00684594	0.670315	ORAI2	9.97576e-12	0.372566	AHSA1	1.52323e-16	1.07106	KIAA1328	3.5639e-12	1.42653	PNP	1.98807e-05	0.638722	ASNSD1	0.000289975	0.375755	TLR2	2.73103e-15	0.886245	MAGEH1	9.55287e-12	0.367997	GNG10	2.28763e-09	0.273509	SYT11
0.00037149	0.377495	WEE1	3.83378e-06	0.401073	HENMT1	0.000501512	0.329364	SHROOM4	0.000628114	0.592177	TRAF2	2.10626e-08	0.883723	MPP7	0.0073316	0.512637	CCDC47	0.00689877	0.414482	NDRG3	1.07246e-11	0.459697	SUB1	1.56808e-16	1.50833	PNN	3.61608e-12	1.97957	CYB561	2.03224e-05	0.578664	RUFY3	0.00029134	1.29087	PRMT9	3.21436e-15	0.668569	SEC24A	9.60711e-12	1.05234	WDR6	2.32861e-09	0.353972	ZCCHC17
0.000375878	0.44908	SLC9A4	4.19454e-06	0.684914	TOMM7	0.00051149	0.577494	MED20	0.000642398	0.574134	ZNF154	2.13703e-08	1.43152	DPH2	0.00736236	0.313353	CTSA	0.00713271	0.257462	ACYP2	1.08121e-11	0.382697	PSMB4	1.87202e-16	0.802003	ZNF850	3.6665e-12	0.993666	NRDE2	2.03237e-05	0.428361	SRI	0.00029795	1.24835	SBNO2	3.74967e-15	0.713501	POLR2K	9.82792e-12	0.44416	UBAP2L	2.39943e-09	0.325434	KLF6
0.000390219	0.414836	HELLS	4.22882e-06	0.304613	TFDP2	0.000515789	1.67664	DNAJC22	0.000666245	0.265142	RBM18	2.2249e-08	0.310443	CREBZF	0.00740418	0.281356	ACOX1	0.00713922	0.310447	SH2D3C	1.21638e-11	0.530005	SNX5	1.92256e-16	2.20138	ICOSLG	3.74536e-12	0.69217	DEF8	2.06737e-05	0.470809	STAG3L4	0.000298894	0.824295	BACH1	3.83461e-15	0.65271	HAX1	1.00216e-11	0.405539	TRANK1	2.47942e-09	0.2944	SIGMAR1
0.000394562	0.436896	OASL	4.25022e-06	0.346988	CABP4	0.000516564	1.37627	GPR82	0.000671292	0.262038	GPI	2.26447e-08	1.27872	SLC25A37	0.00790782	0.499368	PRKCH	0.00722476	0.349303	USP25	1.24469e-11	0.602318	HPRT1	1.97002e-16	1.96424	XPO6	3.76556e-12	0.387739	NR4A1	2.24096e-05	0.372182	C5ORF15	0.000302817	0.733589	FCGR2C	4.50067e-15	0.271895	RNF145	1.12307e-11	0.647317	IL10RA	2.86455e-09	0.490682	MRPL13
0.00039951	0.29217	C4BPB	4.54349e-06	0.487551	TEX264	0.000520556	0.52269	LINC00996	0.000697918	0.385307	C9ORF64	2.28945e-08	1.10878	KLF12	0.0079426	0.503838	2022-03-06	0.00740949	0.316224	NXT1	1.30363e-11	0.654506	NDRG1	2.01294e-16	2.95775	PAK2	3.86529e-12	0.593475	PSME2	2.32175e-05	0.738755	JAGN1	0.000313606	1.06261	SLC8B1	4.61732e-15	0.556233	NUDT14	1.13435e-11	1.58343	MAST3	3.20623e-09	0.938605	LINC00996
0.000415424	0.319979	ERH	4.62583e-06	0.616329	RBL1	0.000520673	0.347015	CXORF40A	0.000703322	0.332401	DDRGK1	2.33571e-08	1.43164	ARHGEF2	0.00818891	0.335335	C1ORF27	0.00747829	0.554627	EAF1	1.30692e-11	0.536574	SLC7A5	2.22976e-16	1.00728	ZNF107	3.94244e-12	1.13232	OSBPL6	2.42163e-05	0.376783	MRPL13	0.000321264	0.721456	ARL8B	4.88848e-15	0.928959	DTNBP1	1.18851e-11	0.377221	ATP5G1	3.5325e-09	0.345122	KCTD10
0.000423923	0.551124	RPL22L1	5.10288e-06	0.689171	GTF2H2C	0.000523232	0.518476	CORO1B	0.000714662	0.309246	RFT1	2.34297e-08	0.944164	SUPT20H	0.00826007	0.546984	ACSM3	0.00774454	0.42312	NUDT3	1.30918e-11	0.556811	SPPL2A	2.33145e-16	1.55241	UTRN	4.16314e-12	0.275341	SCFD1	2.51445e-05	0.988915	CHML	0.000321708	0.503477	DPPA4	5.28245e-15	0.631278	CERS4	1.24359e-11	0.257973	DLEC1	3.87374e-09	0.258722	TMED3
0.000426292	0.353888	HUS1	5.48225e-06	0.52004	TRIP4	0.000569003	0.381514	FOXJ3	0.000770519	2.01004	NR5A2	2.40942e-08	0.393384	EXOSC2	0.00843808	0.836421	RALGAPA1	0.0079884	0.641203	MAGT1	1.32597e-11	0.607625	RASGRP1	2.61521e-16	1.50397	TNFRSF10B	4.50416e-12	0.376191	GSTO2	2.60082e-05	0.562901	GRHPR	0.000328954	0.820345	PTPRA	5.35815e-15	0.685451	LINC01138	1.24844e-11	0.281845	SNHG16	4.24151e-09	0.572503	RRAGA
0.000429067	0.615502	NDUFS6	5.74505e-06	0.759155	ZDHHC24	0.000572219	0.551111	IMPDH2	0.000780822	0.318454	SLC25A11	2.42442e-08	0.644351	TFCP2	0.0085087	0.420606	UBE2A	0.00799498	0.390767	TUBA1C	1.33202e-11	0.484726	BUB3	2.64194e-16	0.467704	ZNRD1ASP	4.81547e-12	0.651751	USP49	2.66635e-05	0.629452	NOL12	0.000329437	1.04335	SCYL2	6.96804e-15	2.2589	PTPRB	1.25499e-11	0.646226	SEC23B	4.51154e-09	1.07643	BAG3
0.000432015	0.332482	STMND1	5.92283e-06	0.305667	TSPO	0.000579377	0.467027	ZNF101	0.000783037	0.497771	ASPSCR1	2.53409e-08	1.01284	DGKD	0.00853646	0.386144	RNF168	0.0080619	0.521777	KIF21A	1.34966e-11	0.477028	CSK	2.69387e-16	1.62885	SLC25A37	5.00737e-12	0.744611	CDKN1A	2.84392e-05	0.387261	VDR	0.000333688	1.04153	SLC16A10	7.11313e-15	0.696062	CD274	1.28777e-11	1.31233	UBR2	5.09779e-09	0.342455	BTF3L4
0.000435568	0.282132	CCNL2	6.09548e-06	0.652425	ALG11	0.000584432	0.564082	STK24	0.00079543	0.318524	COMMD31	2.69563e-08	1.07677	KPNA5	0.00862727	0.282059	TRAF5	0.00808195	0.278795	ABHD13	1.35143e-11	0.360623	PTPN7	2.88674e-16	0.498625	RPS15	5.08473e-12	0.744796	GUSB	3.24976e-05	0.51066	ID3	0.000344765	0.859668	IL4R	7.44385e-15	0.471819	ACTN4	1.29525e-11	1.34408	ARRB1	5.13483e-09	0.399778	LAMTOR3
0.000445448	0.257267	ZHX2	6.17564e-06	0.26849	YPEL3	0.000592306	0.255677	CBL	0.000812268	0.359135	TMEM11	2.69594e-08	0.601106	BTN3A3	0.00867853	0.39291	TMEM236	0.00817966	0.290223	KIF13B	1.39517e-11	0.467863	PIN1	2.93569e-16	1.01948	IFT88	5.41765e-12	0.476529	EMC4	3.55558e-05	0.343924	CASS4	0.000363958	0.582427	CREBZF	8.56427e-15	0.760003	ACTR3	1.33118e-11	0.997202	SETX	5.84852e-09	0.470849	P3H2
0.000457509	0.423849	PPP1R13L	6.40648e-06	0.423881	SESN1	0.000601875	0.439402	AFAP1	0.000945504	0.940392	TAC4	2.72747e-08	0.88363	LINC00910	0.00868496	0.987147	NFIA	0.00830483	0.313081	ELOVL1	1.4764e-11	6.23821	CTSV	3.03879e-16	0.399717	ZNF826P	5.6145e-12	0.33688	SHISA2	4.15589e-05	0.302117	PPM1G	0.000364814	0.379042	TTC3	9.9061e-15	0.373048	RAD21	1.34102e-11	0.699897	MIPOL1	6.58144e-09	0.343799	PLEKHG2
0.000459304	0.390249	ZNF92	6.45673e-06	0.35322	LANCL1	0.000616025	0.288731	B9D2	0.000960217	0.367506	MFAP1	2.76125e-08	0.303222	SELPLG	0.00870454	0.32701	MAP3K5	0.0083798	0.603201	CISD3	1.61382e-11	0.556394	FAM104A	3.07011e-16	1.1147	UG0898H09	5.73681e-12	0.536685	XPNPEP3	4.20577e-05	1.14396	JCHAIN	0.000368003	1.23183	ATG2A	1.01614e-14	0.48766	MTFR1L	1.34327e-11	0.276006	SIVA1	7.75759e-09	0.785788	AGPAT4
0.000468118	0.258725	PRNP	6.58074e-06	0.456157	CARD8	0.000625667	0.317119	TMEM259	0.000962783	0.484126	RBM38	2.79338e-08	0.837339	MPHOSPH9	0.00886361	0.659682	WDR47	0.00838848	0.409012	NFKBIA	1.62059e-11	0.575603	PARP12	3.16559e-16	1.40293	FBXO24	5.76647e-12	0.324739	MYADM	4.31151e-05	0.255286	RBBP4	0.000369195	0.437064	RAB3IP	1.18866e-14	0.43047	CDK4	1.38224e-11	0.279584	NFKBIB	8.29052e-09	1.16116	PDPN
0.000484911	0.954051	ZNF462	7.02698e-06	0.558108	UBE2F	0.000635176	0.270361	RASA4	0.00102246	0.320016	PRR14	2.81769e-08	1.13795	RBM26	0.00893196	0.414085	C5ORF15	0.00873153	1.32779	EGR1	1.78066e-11	0.751873	PPA1	3.74795e-16	2.03691	DENND4A	6.05662e-12	0.285042	KNOP1	4.34543e-05	0.343014	PPP4C	0.000370691	0.274881	FES	2.05623e-14	0.297872	MT-ND4L	1.41419e-11	1.10222	CNTRL	8.77093e-09	0.330336	H1F0
0.000510751	0.270609	BHLHE40	7.06715e-06	0.406773	FAM13A	0.000653498	0.507427	KIAA2012	0.00103504	0.401383	AGPS	2.86394e-08	0.53525	PRPF3	0.00931262	1.06933	HIPK2	0.00898046	0.299816	RAB28	1.9362e-11	0.41193	LAMTOR5	4.24621e-16	2.21808	NPC1	6.54617e-12	2.622	ZBTB8A	4.90386e-05	0.280988	UBXN1	0.000370848	0.605929	TM6SF1	2.1129e-14	0.30991	NPM1	1.51191e-11	0.332577	NDST2	9.99953e-09	0.708543	CLOCK
0.000546046	0.485166	CSF2RA	7.14306e-06	0.442549	C4ORF3	0.000657526	0.299542	VASP	0.0010539	0.520701	SLC39A1	2.86602e-08	1.75961	BCAS4	0.00945892	1.13362	PAK3	0.00910547	0.677082	GADD45B	2.01291e-11	0.736259	KDM2B	4.65858e-16	1.51387	PNISR	6.61541e-12	0.931208	CACNB4	4.92039e-05	0.852732	HSH2D	0.000379836	2.21413	ADGRF1	2.56958e-14	0.28281	RBM4	1.54123e-11	0.99192	DIAPH2	1.02256e-08	1.05648	CCDC138
0.000552587	0.644018	PCSK5	7.1499e-06	0.93615	ZNF302	0.000670631	0.282179	ATF6	0.00110798	0.482769	EDEM2	2.98119e-08	0.74746	ARHGEF10	0.00955125	0.374538	PTPN7	0.00920949	0.742734	IL17RA	2.02086e-11	0.845703	RAB30	4.76175e-16	0.651879	GJC1	6.93437e-12	0.576587	MRPL55	4.96352e-05	0.44212	TUBB	0.000382287	0.504728	ACAA1	2.63248e-14	0.387938	GLTSCR2	1.88977e-11	1.24337	CD300LF	1.14465e-08	0.774753	DNAJA4
0.000561791	0.406121	ZNF586	7.49131e-06	0.491417	C2ORF68	0.00067265	0.269233	SMG1P2	0.00118363	0.333396	HMGXB3	3.04417e-08	0.968927	ACBD6	0.00955619	0.5178	AGFG1	0.00945965	0.303937	FTH1	2.22464e-11	0.434828	IL4R	5.33492e-16	1.4944	LINC00670	7.40843e-12	0.712067	PPIF	5.21366e-05	0.462618	MPZL3	0.000389267	1.06392	EFR3A	2.66854e-14	0.64063	ECHDC2	1.9301e-11	0.50841	C6ORF1	1.29958e-08	1.08154	DNAJB4
0.000591228	0.366448	MRPL10	7.63622e-06	0.340525	LILRB4	0.000680126	0.576696	ACOT7	0.00118583	0.768169	EXTL3	3.25542e-08	0.818426	DNAJC19	0.00964675	1.2423	AFAP1	0.00946324	0.285543	NFKBIB	2.54707e-11	0.31851	APOBEC3G	5.53011e-16	2.03107	GIT2	8.28983e-12	0.479901	SH3GLB1	5.31403e-05	0.494084	TMEM184C	0.000390435	0.352538	FBXO38	2.6918e-14	0.368283	KLF6	1.94991e-11	0.3481	MAFB	1.47881e-08	0.570136	ARRDC3
0.000600208	0.317828	OFD1	7.64596e-06	0.488372	CROT	0.000734029	0.250136	TNFRSF1B	0.00125345	0.384925	PRKAG1	3.42898e-08	1.04868	SH2B1	0.00966872	0.302967	2022-09-06	0.00956563	0.645149	CDK12	3.0423e-11	0.420269	ITPA	5.56985e-16	1.19443	SPATA6L	8.46521e-12	1.23637	MEF2D	5.53459e-05	0.523054	PPT1	0.000402499	0.297042	EMILIN2	3.66532e-14	0.280788	PPDPF	1.97718e-11	0.514876	NDUFA6	1.49589e-08	0.78309	KEAP1
0.000603714	0.33006	PLEKHB2	7.66956e-06	0.283106	CTSS	0.000744504	0.345886	ETFB	0.00126556	0.410806	MCM7	3.54899e-08	0.572818	SECISBP2	0.00983009	0.465732	IFT27	0.0096415	0.277562	GPR89A	3.05348e-11	0.423406	CDV3	5.8568e-16	1.81324	SHOC2	8.90498e-12	1.48323	TIFA	5.67377e-05	0.281342	SLC15A4	0.000405028	1.15954	TMEM123	4.02432e-14	0.840487	LINC00996	2.01058e-11	1.3493	CCNY	1.76632e-08	0.647634	MRPL47
0.000605517	0.558637	ARHGEF21	7.78724e-06	0.819346	ZNF91	0.000754327	0.353498	SLC1A51	0.00134602	0.277681	RAB11A	3.71868e-08	1.24916	DTWD1	0.0098941	0.606594	CDC37L1	0.00983911	0.316256	PARP15	3.11974e-11	0.766985	PSMD1	5.88286e-16	1.9314	SMG1P1	9.96967e-12	1.48475	WNT2B	5.97191e-05	0.461369	MKL1	0.000415044	0.514175	HEXA	5.39668e-14	0.434621	CALR	2.01064e-11	4.0463	RNF44	1.94737e-08	0.316604	GNL3
0.000632824	0.726504	OR7D2	8.22791e-06	0.577648	PTPRE	0.000759614	0.28681	NUP58	0.00137491	0.99427	SERTAD2	3.83485e-08	0.82384	POM121	0.00990338	0.512558	BAZ1A				3.20669e-11	0.58449	RAB5A	5.99095e-16	2.05303	FLRT2	1.03199e-11	0.832808	QDPR	6.15067e-05	0.45311	HMGN2	0.000417628	0.480583	ZNF333	6.18618e-14	0.251185	ARL5B	2.04075e-11	0.280191	SCP2	2.15991e-08	0.385025	ANKRD10
0.000640434	0.528388	NISCH	8.30999e-06	0.901636	ZNF746	0.000770264	0.660953	FBXW7	0.0013986	0.262912	SMG1P21	3.92527e-08	1.47959	EIF3J-AS1	0.00998985	1.50223	PKIG				3.29596e-11	0.570732	GNG5	6.63812e-16	2.25921	DENND4B	1.30136e-11	1.29548	FBP1	6.37628e-05	1.95094	PTGDS	0.000429866	0.590285	SMG9	6.30578e-14	0.54964	VPS28	2.05064e-11	0.897565	FRG1HP	2.60393e-08	2.45837	HAMP
0.000642294	0.454679	SLC35D1	8.34091e-06	0.331359	LAMTOR1	0.000784142	0.311251	LRRC74B	0.00143308	1.13748	CLSPN	4.42643e-08	1.63264	ANXA2R							3.35191e-11	0.361988	ILK	6.79579e-16	1.7064	TNFAIP8	1.3644e-11	1.05253	MPST	6.94865e-05	0.395549	RPL26L1	0.000433384	0.368329	LRRC59	7.737e-14	0.324114	BSG	2.12986e-11	0.270646	NAA50	2.65914e-08	0.409341	ACO1
0.000652115	1.40574	RND1	8.57644e-06	0.397297	CD8B	0.000824355	0.801416	ABHD12B	0.00143651	0.303772	CARHSP1	4.90873e-08	0.959564	AGTPBP1							3.49261e-11	0.437562	LASP1	6.80248e-16	3.42773	TNF	1.38595e-11	2.78291	CHST5	7.09058e-05	0.631962	NDUFAF4	0.000435729	0.586706	NOD2	8.14746e-14	0.608916	TP53INP1	2.15417e-11	0.799005	NEDD4	2.92614e-08	0.308652	ORAI3
0.000660231	0.401964	HIVEP2	8.82228e-06	0.250274	ANKRA2	0.000850157	0.405072	MFSD14A	0.00149729	0.450442	DHDDS	5.1121e-08	0.497942	VPS35							3.61495e-11	0.461668	LPXN	7.18508e-16	2.20808	TBCB	1.40855e-11	0.898104	SPATS2L	7.10651e-05	0.912932	CD2AP	0.000441334	0.824966	STARD4	9.87393e-14	0.27797	RBM14-RBM4	2.42285e-11	0.402904	COX20	3.14864e-08	0.803549	MAPK13
0.000665007	0.274573	RFWD3	8.83881e-06	0.475971	IRF9	0.000850464	0.494974	LIMK1	0.00152474	0.409269	PRKY1	5.38839e-08	1.51835	FAM175A							4.38364e-11	0.344436	YWHAB	7.70175e-16	0.545984	HCAR1	1.4469e-11	2.05978	GAB3	7.11466e-05	0.359038	MANBAL	0.00044407	1.27263	RAPGEF2	1.09166e-13	0.653402	RFTN1	2.64253e-11	0.449783	PPHLN1	3.21358e-08	0.543589	PAQR3
0.000671264	0.496455	CHI3L2	9.10878e-06	0.817562	CROCCP2	0.000855418	0.322814	TEX35	0.00153478	0.273383	NIT2	5.46144e-08	1.32419	FBXO24							4.4064e-11	0.333994	ATP5B	8.46269e-16	1.08933	GDPD1	1.52159e-11	0.415442	EIF2S2	7.5222e-05	0.445148	DCAF7	0.000450709	0.648056	SPIDR	1.09615e-13	0.412027	WDR45B	2.71367e-11	0.712136	DUSP23	3.30881e-08	0.271544	GAPDH
0.000671556	0.692383	BAZ1A	9.14293e-06	1.33586	TRIM52	0.000901831	0.351743	TPD52	0.00154418	0.3626	LMBRD1	5.64941e-08	0.667746	SIGIRR							4.89039e-11	0.580248	CFAP20	8.49152e-16	3.36232	ZNF677	1.55479e-11	0.279437	CCR4	7.62542e-05	0.318025	ISG20	0.000451839	0.985574	IRF7	1.18046e-13	0.286887	EXOC6B	2.77326e-11	0.483155	REEP2	3.64699e-08	0.261879	BRCA2
0.000674519	0.319181	COQ10B	9.52062e-06	0.315683	TNFAIP8	0.000929932	0.351792	DYNLT3	0.00154894	0.284951	LRRC37B	5.88272e-08	2.65784	ABO							5.14153e-11	0.446597	PSMD14	8.55974e-16	0.867611	TEX41	1.58204e-11	1.00056	PAIP2B	7.72901e-05	0.520751	SLC25A33	0.000453917	1.35412	SPATA20	1.23948e-13	0.291212	MYL12B	2.79095e-11	0.684939	MS4A6A	3.6706e-08	0.471293	PIR
0.000715386	0.642048	RASGRP4	9.61047e-06	0.297141	DDOST	0.000970099	0.323645	DEGS1	0.0015792	0.253927	MAN1C11	6.00424e-08	0.305463	KIAA1328							5.61803e-11	0.469414	AP2S1	9.43321e-16	1.80608	NDE1	1.67512e-11	1.19069	ACSS1	7.72906e-05	1.04157	PAK1IP1	0.000461918	0.364399	CREB3	1.25254e-13	0.35797	DDOST	2.84067e-11	0.44988	KRBOX4	3.84063e-08	0.757352	UCK2
0.000735925	0.671178	RASGRP3	9.9815e-06	0.430522	PWP1	0.00102364	0.449462	SOWAHC	0.00164662	0.266292	STX6	6.10109e-08	0.79461	PIBF1							5.69375e-11	0.716667	RUNX3	1.0043e-15	0.681509	LIMS3	1.73292e-11	0.285304	SLC39A11	8.00467e-05	0.851475	GOLGA7	0.000475305	0.738089	ELMSAN1	1.58474e-13	0.263031	NGDN	2.86536e-11	0.715694	COX17	4.07499e-08	0.465034	IGF1
0.000741704	0.454345	ZFYVE16	1.0206e-05	0.418166	DPYD	0.00103599	0.485236	ZNF121	0.00168764	0.275242	FBXW2	6.51609e-08	1.69704	ENOSF1							5.7893e-11	0.328177	RNF181	1.03604e-15	0.888718	ZBTB24	1.86561e-11	0.325816	STOML1	8.07165e-05	0.29729	HADH	0.000478154	1.01251	DPH6	1.64205e-13	0.819659	LINC01140	3.10423e-11	0.75762	CCND3	4.15888e-08	0.451248	DERL1
0.000781563	0.454796	IFT22	1.02126e-05	0.79526	RPL23AP82	0.00105161	0.759655	ATP1B2	0.00170842	0.533517	PON2	7.13024e-08	0.616693	TPK1							5.84115e-11	0.443405	LRP10	1.03881e-15	1.51659	CELF2	1.98813e-11	1.14794	TMEM140	8.31641e-05	0.522509	NAV1	0.000489022	0.834336	ARIH1	1.87389e-13	0.642641	ANXA4	3.13496e-11	0.264483	KIAA1191	5.68142e-08	0.353496	SHE
0.000806612	0.36197	UHRF2	1.03881e-05	0.491072	COASY	0.00108294	0.395219	MAP3K13	0.00174516	0.284747	OAS21	7.37328e-08	1.01725	THYN1							5.97684e-11	0.48288	LPP	1.1448e-15	1.29271	CSF2RA	2.46799e-11	0.391042	ATP6V0B	8.59253e-05	0.426015	NIFK	0.000489469	0.426399	R3HDM4	1.96533e-13	0.985139	KMT5C	3.1783e-11	0.668568	CAPN2	7.12584e-08	0.314461	IER2
0.000807769	0.311591	HIP1R	1.04323e-05	0.325312	PLEKHJ1	0.00108641	0.273566	GALT	0.00175011	0.251566	ETFB1	7.77984e-08	0.893768	GCNT2							6.06169e-11	0.483153	BSG	1.1758e-15	0.846338	MCM5	2.54311e-11	0.339969	SCAND1	9.97156e-05	0.72365	SMIM20	0.00049208	0.477575	GSDMD	2.26918e-13	0.47106	CYSTM1	3.19277e-11	0.33979	SH3BGRL3	7.98793e-08	0.450729	TNFRSF10D
0.000808309	0.374882	ZNF584	1.07675e-05	0.480877	ZNF600	0.00109145	0.39102	ETV31	0.00175445	0.265366	TSSC1	8.07948e-08	1.01011	STX16							6.32498e-11	0.40443	SGSH	1.28256e-15	1.79633	LUC7L3	2.55165e-11	0.917808	ASB2	0.000102939	1.6519	ZNF33B	0.000496079	1.39864	AMPD2	2.29551e-13	0.379163	OPHN1	3.19936e-11	1.7349	NAIP	9.84403e-08	0.298986	C11ORF24
0.000814395	0.737483	LINC00937	1.07888e-05	0.279257	HMOX2	0.00111018	0.325962	METTL15	0.00184195	0.440978	TIPRL	8.18079e-08	0.783097	WDR6							6.41894e-11	0.497594	LIMA1	1.28436e-15	0.817358	CRX	2.87357e-11	0.870973	LINC00963	0.000106198	0.632396	STX7	0.000506687	0.533875	NARF	2.66848e-13	0.485303	2022-09-07	3.24703e-11	0.612515	PTPRE	1.02905e-07	0.288263	TNFSF15
0.000815119	0.567979	IL5RA	1.0914e-05	0.692766	L3HYPDH	0.00116513	0.368989	DOCK8	0.00184974	1.51452	CA5A	8.21079e-08	0.970791	TRDMT1							7.3289e-11	0.721273	COX10	1.34923e-15	1.00583	BTBD1	3.22764e-11	0.467748	ESRRG	0.00010805	0.451437	IRF7	0.000519091	0.938146	ZNF563	2.97567e-13	0.569244	HNRNPK	3.25535e-11	0.479239	MUM1	1.35107e-07	0.412547	ANKRD9
0.000823117	0.611656	ISG20L2	1.12843e-05	0.594293	SNAPIN	0.00118032	0.422403	AHI1	0.00201284	0.314289	MIS18BP1	8.3815e-08	0.546594	PPARD							7.57112e-11	0.480722	MGAT1	1.43146e-15	0.42847	LINC00907	3.41724e-11	0.75948	KIF13B	0.000109757	0.261028	GSTM2	0.000524408	1.52215	FAM124A	3.18365e-13	0.444411	CYB5B	3.47478e-11	0.564653	MYD88	1.42015e-07	0.494337	PBRM1
0.000844773	0.392698	EMD	1.13526e-05	0.596785	EZH1	0.0011851	0.491431	TMEM184B	0.00206127	0.75252	MSR11	8.69698e-08	0.818901	ZNF880							7.7893e-11	0.726737	NAPG	1.53438e-15	1.37057	MAPKBP1	3.55773e-11	0.420315	SLC12A9	0.00011058	1.03897	NAA25	0.000526922	0.284629	ZFAND6	3.36033e-13	0.547057	AMD1	3.50853e-11	0.313405	SNX18	1.95846e-07	0.707901	PRKCH
0.000854829	0.32379	C1ORF52	1.13543e-05	0.274297	IKZF3	0.00122602	0.288642	MED31	0.00209323	0.641093	ACSL4	9.52374e-08	1.77288	PXYLP1							7.83295e-11	0.567965	SAMHD1	1.55582e-15	0.990971	WDPCP	3.6569e-11	0.259045	ENPP1	0.00011901	0.617944	JMY	0.000532599	1.26329	CHP2	3.59566e-13	0.58841	PIGT	3.54858e-11	0.743795	CLIC2	2.41787e-07	0.320239	PARVB
0.000856685	0.619522	YTHDC1	1.14968e-05	0.636679	C1ORF56	0.00122808	0.992208	FAM227A	0.0021192	0.300857	PTPN1	9.85855e-08	0.932032	SHPRH							8.12226e-11	0.306192	CYC1	1.61647e-15	0.700812	ZNF283	3.85771e-11	1.19855	NCAM1	0.000123978	0.662854	MMP12	0.000539467	0.821779	RNF121	4.00484e-13	0.297269	CHKA	3.62091e-11	1.47794	PKN1	2.5906e-07	1.06612	TMEM184B
0.000858093	0.450988	BIRC2	1.16057e-05	0.405855	PEX3	0.00122816	0.484129	TMED8	0.00221498	0.322423	DNAJC25-GNG10	1.00707e-07	0.489764	CYSLTR1							8.91865e-11	0.306306	CHORDC1	1.68538e-15	1.7201	JAK3	3.90602e-11	7.341	CCL3	0.000124798	0.552926	C19ORF48	0.000550429	1.002	SPEN	4.14024e-13	0.480548	SPATA13	3.70687e-11	0.271502	SDF4	2.63318e-07	0.474549	LYSMD2
0.000861252	0.772874	PLIN5	1.20064e-05	0.371715	ASAH1	0.00126217	0.444748	C21ORF91	0.0022357	0.506848	SYNJ2	1.02585e-07	0.740761	CD55							8.92888e-11	1.02143	GABPB1	1.6885e-15	3.57658	ZNF93	3.96873e-11	1.01664	PLXNA3	0.000158069	0.409043	RUBCN	0.000552562	1.55087	EPHA1	4.89874e-13	0.42121	C11ORF49	3.85312e-11	0.837251	VWA5B1	3.43577e-07	0.27038	C14ORF119
0.000864886	0.481103	KSR1	1.21807e-05	0.533737	APEX1	0.00128854	0.406052	SERPINB9P1	0.00226973	0.262502	DCTN3	1.02621e-07	0.538183	STMN1							9.38344e-11	0.330102	GNG2	1.69149e-15	0.754851	EPN1	4.4881e-11	0.256865	KAZN	0.000163913	0.301809	ADA	0.000553648	1.57651	SYT5	4.95492e-13	0.605878	CCDC18-AS1	4.00534e-11	0.679438	PPIL4	4.3768e-07	0.352977	NME4
0.000892388	0.409883	AP1G1	1.26539e-05	0.794171	MRPS18B	0.00129513	0.295044	RNF1681	0.00231909	0.429449	RGPD11	1.06602e-07	0.867485	CHMP3							9.76234e-11	0.368817	COX5B	1.72389e-15	5.59795	C1ORF162	4.58655e-11	1.55146	ARRDC3	0.000176625	0.438008	CREM	0.000561225	0.599089	NXT1	4.98044e-13	0.361794	DHRS7	4.62677e-11	0.633589	NDUFAF3	4.54179e-07	0.320427	ANO10
0.000897718	0.555471	NFATC1	1.26598e-05	0.745876	COMMD9	0.00129908	0.379952	EXOSC6	0.00235341	0.427072	VEZT	1.07335e-07	1.6987	GUSBP1							1.19628e-10	0.880439	PCK2	1.74551e-15	1.26015	HMGN2	5.24665e-11	1.50399	ENTPD6	0.000182472	0.555504	C14ORF119	0.000565831	1.65135	LCMT2	5.56154e-13	0.439942	SETD5	4.74834e-11	0.58431	SPTBN1	4.56628e-07	0.29006	FEM1B
0.000926985	0.369935	DRAM1	1.27359e-05	0.287873	OLMALINC	0.00130734	0.463931	TSPAN3	0.00240842	0.387018	RBM10	1.08421e-07	0.436707	WASF2							1.19901e-10	0.489428	HADHA	1.75907e-15	3.88705	HOPX	5.59707e-11	0.917672	ISOC1	0.00018976	0.455948	MPEG1	0.000571312	1.39432	FNIP2	6.18728e-13	0.581212	AP3S1	4.89776e-11	0.334866	HUWE1	4.72188e-07	0.31266	SLC25A43
0.000929053	0.562783	NANS	1.2817e-05	0.386202	CENPK	0.00132419	0.328005	SRP72	0.002414	0.293786	FASTKD5	1.09023e-07	0.584369	SLC44A2							1.35666e-10	0.301891	TERF2IP	1.76156e-15	1.11676	KIAA1551	6.00237e-11	0.637479	PMVK	0.000197469	1.77082	STMN1	0.000594601	1.72341	CSF1	6.42334e-13	0.663524	VPS13A	5.52628e-11	1.08661	PXN	5.42092e-07	1.36915	LONP1
0.000953345	0.516195	ZNF776	1.28922e-05	0.292716	TMEM126B	0.00135032	0.355968	TIMP11	0.00242573	0.293241	AEN	1.10028e-07	0.330257	TMEM116							1.55843e-10	0.415218	GOLGA8A	1.77568e-15	1.98323	SPATA17	6.88877e-11	4.48991	GCNT3	0.000206747	0.620218	SVBP	0.00060225	0.556913	MKLN1	6.49747e-13	0.287029	TSC22D3	5.63017e-11	0.389933	PHF20	6.77466e-07	0.279005	SMIM19
0.000955451	0.653098	SCYL3	1.31685e-05	1.00496	PIN4	0.00136101	0.461928	HSD11B1L	0.00249923	0.284328	CCNB1IP1	1.11451e-07	2.18258	SGK494							1.71789e-10	0.468951	ATP2C1	2.11999e-15	1.22817	JMJD1C	6.9026e-11	0.55096	PLXDC1	0.000212422	0.8284	RFT1	0.000627325	0.665426	POLR2J2	8.27057e-13	0.316131	SSR2	5.72739e-11	1.21912	REPIN1	6.79676e-07	0.316177	DNAJA1
0.000956533	0.578593	ARHGAP27	1.33753e-05	0.530639	RECQL	0.00136595	0.78402	MGRN1	0.00253878	0.502123	INO80D	1.13404e-07	0.57301	ERP29							1.74784e-10	0.422862	COX6A1	2.15155e-15	1.31632	WEE1	7.23532e-11	0.532452	PEBP1	0.000212925	0.267667	COMMD8	0.000637033	1.63997	CDC73	8.3379e-13	0.396881	ECH1	5.77214e-11	1.12035	SCIMP	7.90964e-07	0.77099	ACE
0.000969389	0.659807	COX16	1.34857e-05	0.30204	MFSD10	0.00147249	0.268561	SRSF3	0.00256499	0.298909	ATP6V1A1	1.15039e-07	2.59216	KANSL1L							2.00614e-10	0.570513	ELOF1	2.21106e-15	0.635877	RPS16	7.65987e-11	1.04772	CDH13	0.000219537	1.05679	UAP1	0.00064268	1.20026	FAM159A	8.39612e-13	0.36137	STARD4	5.77585e-11	1.1413	MRPL57	7.91106e-07	0.385968	TMEM184C
0.000969552	0.471266	ELP2	1.4225e-05	0.934875	VPS35	0.00150955	0.43593	PUM3	0.00263773	0.253351	SNRPC	1.18976e-07	0.2928	ZNF528							2.07851e-10	0.533098	GCHFR	2.21412e-15	1.24979	MALT1	7.91023e-11	3.59579	SRGAP1	0.000234577	0.455421	CKAP2	0.000647067	1.38172	EDEM3	9.18974e-13	0.734874	SLC25A44	5.85854e-11	0.454835	IMPDH2	9.22433e-07	0.627973	LINC00854
0.000974395	0.38503	COQ10A	1.43443e-05	0.381536	MRPL9	0.00161517	0.317709	ANXA11	0.00267326	0.473203	KANK2	1.28276e-07	0.888997	EML1							2.1632e-10	0.441399	ICAM3	2.23304e-15	0.380769	HTT	8.15285e-11	0.277704	YIPF1	0.000242001	0.268174	CSRP1	0.000670958	0.476865	FRK	1.01734e-12	0.437781	RTFDC1	5.90206e-11	0.69859	DPP7	9.90479e-07	0.251855	NABP1
0.000986041	0.527811	SLC39A8	1.43712e-05	0.255383	OPTN	0.0016881	0.277823	MXRA7	0.00270743	0.432811	CAPS	1.29391e-07	0.559852	CNOT7							2.17947e-10	0.43456	STIP1	2.28494e-15	1.88556	CIB1	8.34768e-11	0.274259	SEC31A	0.000246445	0.474539	RABIF	0.000683056	0.393585	CD53	1.0546e-12	0.377519	SRI	6.1972e-11	0.871685	NCF1B	1.07999e-06	0.343681	ARID5B
0.000995769	0.293225	TERF2IP	1.43813e-05	0.755769	KEAP1	0.00171563	0.56896	NAXE	0.00272777	0.301755	PFKL	1.33307e-07	0.41593	ITGB7							2.23166e-10	0.641172	OTULIN	2.31012e-15	2.74083	ORAI1	8.64969e-11	0.406443	ARCN1	0.000247509	0.612182	GPM6A	0.000699906	0.618897	MSRA	1.61031e-12	0.511785	ZNF578	6.33172e-11	1.65441	LMO3	1.11159e-06	0.357784	SIPA1
0.000996155	0.337965	FOXO1	1.44677e-05	0.344093	NMUR1	0.00178609	0.500576	SLC25A30	0.00273738	0.457638	GRHPR	1.34453e-07	0.943286	ZNF333							2.44853e-10	0.309976	FDPS	2.32907e-15	1.747	EGLN2	8.92175e-11	1.41139	ALDH1L2	0.00025044	0.670414	RPF2	0.000700389	0.75393	MROH7	1.66801e-12	0.410154	SPTY2D1	6.53098e-11	1.42131	NCOA2	1.26651e-06	0.756713	DSN1
0.00103493	1.22667	KCNJ15	1.51192e-05	0.322644	NAAA	0.00180132	0.517357	TNRC6C	0.00278481	0.275714	ZFAND2A1	1.37263e-07	0.332244	N4BP2L2							2.46381e-10	0.591286	SH3GLB1	2.38935e-15	1.07537	NPM1	8.96024e-11	0.449863	NDUFB10	0.000250822	0.71042	MAGOH	0.000710604	1.35759	NUMB	1.78493e-12	0.397865	SF3A1	7.07044e-11	0.408692	BCL7B	1.32447e-06	0.321949	FARP1
0.00104009	0.522511	THAP12	1.53949e-05	0.587379	ZNF445	0.00182954	0.406271	PSENEN	0.00283619	0.280824	DOHH	1.48018e-07	1.17115	FAM120B							2.5684e-10	1.09759	MCF2L2	2.50079e-15	2.68033	RRN3P1	9.36177e-11	1.47897	ERBB3	0.000257311	0.382589	TNFSF15	0.000713272	0.46904	COPA	2.00229e-12	1.36241	LSR	7.39051e-11	0.264646	SNRPD2	1.33399e-06	0.635448	PEX19
0.00104276	0.562474	C4ORF36	1.54809e-05	0.379662	UBXN1	0.00188193	0.400672	SPAG16	0.00287135	0.375576	EIF2AK2	1.52806e-07	1.2589	RNASEL							2.77261e-10	0.467312	CTSA	2.79055e-15	2.88031	PACS1	9.80732e-11	0.664037	CYC1	0.000259006	0.455917	CCND3	0.000737972	1.3517	APOBEC3A	2.1126e-12	0.78225	CBFB	7.85404e-11	2.02936	INSR	1.94137e-06	0.478918	NFE2L3
0.00106974	0.420297	ZPR1	1.5704e-05	0.259763	CD2BP2	0.00189372	0.408427	ALDOC	0.00287144	0.272915	SACM1L	1.60055e-07	1.39372	COA5							2.77713e-10	1.18503	FOXO1	2.79136e-15	0.822625	FOXK1	9.90892e-11	0.320715	PPP1R10	0.000285194	0.39954	PHLDB3	0.000751061	0.285813	TPP1	2.19219e-12	1.8946	TTLL7	8.57706e-11	0.845331	EIF4EBP2	2.23609e-06	0.312768	PDGFA
0.00107406	0.27967	TRIM73	1.67697e-05	0.545951	ARRDC3	0.00195646	0.321553	COX7B	0.00293422	0.46413	PRPF4B	1.60806e-07	0.975178	ZNF138							2.82609e-10	0.408048	CISD3	2.8119e-15	1.77035	CR2	1.02942e-10	1.94347	THAP2	0.000295882	0.268494	RGS2	0.000775605	0.772572	GRK6	2.57049e-12	0.284979	PMF1	9.21197e-11	0.426068	TMED3	2.30341e-06	0.466113	IL21R
0.00109285	0.514674	TNFRSF13C	1.8072e-05	0.35548	TMC8	0.00196982	0.339995	PDCL3	0.00298872	0.25285	PIAS3	1.60853e-07	1.05156	METTL3							3.21078e-10	0.615846	IFIH1	2.87382e-15	0.761547	NUPR1	1.02962e-10	0.433073	MCF2L2	0.000304204	0.456645	ZNF770	0.000777507	0.555841	NPIPA1	2.60309e-12	1.34088	ARL13B	9.23048e-11	0.290385	PDGFA	2.35719e-06	0.52792	SAV1
0.00111217	1.579	AKAP6	1.85419e-05	0.344899	SSNA1	0.00198336	0.471173	CAMKK2	0.00303512	0.261609	C7ORF73	1.61195e-07	0.321241	NDUFS6							3.97615e-10	1.18712	C20ORF194	3.10651e-15	0.469292	MT-CO2	1.04044e-10	0.542334	SFXN4	0.000310794	0.651051	MRPL15	0.000785954	2.70129	PNMA2	2.69278e-12	0.274008	MCL1	9.55167e-11	1.45455	NLRC5	2.69543e-06	0.617104	CADM1
0.00111275	0.55792	SPTAN1	1.87034e-05	0.34499	KLHDC2	0.00204523	0.260941	DYNLT1	0.00304153	0.776177	SLC25A12	1.61349e-07	0.572132	ADAMTSL3							4.08522e-10	0.453425	ZEB1	3.13012e-15	1.34789	MEF2C	1.06922e-10	1.89521	HCG11	0.000326674	0.261159	HGSNAT	0.000785987	0.767047	ITSN1	2.72455e-12	0.447607	RBM5	9.71807e-11	0.31621	ZBTB1	2.72471e-06	0.515273	MAB21L3
0.00111745	0.401938	GALM	1.87044e-05	0.917935	NOS1	0.00206642	0.888292	SRGAP3	0.00315505	0.523587	LAMTOR3	1.68071e-07	0.602137	FLOT2							4.82156e-10	0.350151	SLA	3.39797e-15	2.51416	SIDT2	1.18085e-10	1.25068	TMEM9	0.000339103	1.56319	SIPA1L3	0.000789284	0.60592	CD300LB	3.0126e-12	0.259895	TUBB	9.99614e-11	0.372566	QSOX1	2.75804e-06	0.675966	TSPAN31
0.001136	0.253336	UTP6	1.87259e-05	1.77145	SLCO4C1	0.00210483	0.257892	MLXIP	0.00323045	0.312966	CFAP20	1.74154e-07	1.04869	ZNF83							5.16619e-10	0.668906	MRPL18	3.50539e-15	0.550249	STK17B	1.18642e-10	1.26366	STARD5	0.000359756	0.253585	PRKACB	0.00079456	1.44051	ICOSLG	3.33327e-12	0.414808	HIGD1A	1.0058e-10	0.706807	UBE2R2	2.80144e-06	1.84475	EMP2
0.00115936	0.26209	FUS	1.87697e-05	0.271582	POLR3GL	0.00211142	0.457457	TMEM167A	0.00328352	0.263711	RTN3	1.85984e-07	0.865163	ATF6B							6.26436e-10	0.352115	CAP1	3.56193e-15	0.701962	RPS4X	1.2397e-10	1.11508	FFAR2	0.000387423	0.256519	TNFAIP8L2	0.000803596	0.373117	TLR1	3.58608e-12	0.401694	APEX2	1.03373e-10	0.283151	CKLF	2.91862e-06	0.509355	RNF8
0.00118785	0.86128	FER1L5	1.91465e-05	0.390502	SMG1P7	0.00212179	0.399032	PIGP	0.00329793	0.730997	TET2	1.86719e-07	0.615227	CCNG1							6.52136e-10	0.311219	PSMC1	3.6644e-15	1.13955	ZNF462	1.24039e-10	0.464229	SCYL1	0.000413506	1.33946	PTPRCAP	0.000804	1.48787	KIFC3	3.77236e-12	0.49782	LGALS8	1.13404e-10	1.04198	CTNND1	3.23961e-06	1.25579	PIF1
0.00120055	0.2831	BCLAF1	1.9228e-05	0.492094	HIST1H1D	0.00214039	0.866697	CHPT1	0.00339853	0.516504	GTF2IRD2	1.89752e-07	1.05762	WWP1							6.71497e-10	0.35462	ACTG1	3.70109e-15	1.33245	EPS15L1	1.31907e-10	0.413837	ICAM1	0.000435097	0.533454	UTP14A	0.000814971	1.81509	PLCXD1	3.95533e-12	0.305882	HLA-E	1.15914e-10	0.449305	C9ORF72	3.28775e-06	0.394194	ALG1
0.00120211	0.509619	KCNA31	1.93655e-05	0.36424	CREB1	0.00216785	0.659595	USP11	0.00359311	0.361909	FAM103A1	2.04284e-07	1.78162	PAQR8							6.93977e-10	0.292969	IFI35	3.88344e-15	0.547708	ZNF714	1.39517e-10	0.881992	BCKDHA	0.000458372	0.511805	RFC2	0.000820129	0.546975	RDH13	3.97919e-12	0.451145	TSPYL4	1.1912e-10	0.737817	CSK	3.31381e-06	0.527994	NOS3
0.00122174	0.481524	KRAS	1.97198e-05	0.881422	RNF170	0.00221057	0.505708	GMDS	0.00364932	0.566176	DNAJC221	2.0644e-07	0.616148	PHC3							7.07254e-10	0.585713	TMEM140	4.19978e-15	2.13877	SAV1	1.46182e-10	1.26993	TK2	0.000462655	0.325905	CD59	0.000820949	0.461603	NDUFA2	4.52312e-12	0.298738	SRPRA	1.21668e-10	0.547821	ATIC	3.55171e-06	0.287563	COQ10A
0.00123332	0.404285	SNIP1	2.01243e-05	0.258849	SPG11	0.00228681	0.412293	IFT88	0.00371536	0.66817	ZNF793	2.16746e-07	0.608868	RPAP2							7.14031e-10	0.374262	WDR1	4.2142e-15	1.72326	MANSC1	1.4887e-10	0.345223	MTDH	0.000483551	0.491813	KPNA2	0.000821638	0.559009	SLC39A10	5.31919e-12	0.34887	DYNLL1	1.21952e-10	0.360288	ECD	3.76236e-06	0.628814	CD2BP2
0.00134903	0.573363	IKBKE	2.03288e-05	0.603707	CLIC3	0.0023814	0.291421	DNAL1	0.00371894	0.266097	GPS1	2.2683e-07	1.00659	PIGC							7.1778e-10	0.564427	CCM2	4.32086e-15	1.59297	TRAF3IP2	1.49841e-10	0.697705	SLC50A1	0.000498934	0.295521	MOB4	0.000845027	0.34711	IL1RAP	5.62652e-12	0.801402	TPM1	1.22951e-10	0.271425	NDUFC2-KCTD14	3.94125e-06	0.41783	MRRF
0.00135092	0.733665	2022-03-09	2.0765e-05	0.380097	ZNF836	0.00238416	0.355852	FABP21	0.00374071	0.275022	SUCO	2.28203e-07	0.694985	ANKMY1							7.63896e-10	0.306811	TUBB4B	4.84154e-15	3.07963	RAPGEF6	1.6723e-10	1.08761	NDUFC2-KCTD14	0.000503673	0.390901	VBP1	0.00084746	0.491666	MYO5A	6.19285e-12	0.284223	SOD1	1.24624e-10	1.21704	OPTN	5.1794e-06	0.430384	QPCTL
0.0013531	0.26583	HSPA4	2.09402e-05	0.446714	IRAK4	0.00241913	0.292281	MR1	0.00386571	0.415797	NOMO2	2.29012e-07	1.74525	HYKK							8.27193e-10	1.26665	NCALD	5.12827e-15	1.5214	EIF2S3	1.70428e-10	0.818211	APMAP	0.000540804	0.270406	FAM49A	0.000860356	0.265015	ANXA11	6.91447e-12	0.547169	CAMLG	1.25038e-10	0.727046	FADS2	6.94263e-06	0.445848	PLA2G12A
0.0013981	0.2517	PAICS	2.19929e-05	0.34521	TGOLN2	0.00245995	0.33231	OGFR	0.00392258	0.325521	FBXO28	2.29904e-07	0.36166	ARHGAP15							9.14826e-10	0.257819	SLC38A2	5.61446e-15	1.57383	PDZD7	1.82702e-10	0.345667	WBSCR22	0.00055992	0.268421	KANK1	0.000866725	0.584517	LYPLA2	7.93604e-12	1.17551	FAM46C	1.31067e-10	1.74259	ZNF133	7.57405e-06	1.26729	PTGR1
0.00140631	0.304534	TCTN2	2.2121e-05	0.4997	POTEI	0.00246191	0.646341	GPD1L1	0.00393128	0.262806	CERS5	2.31497e-07	0.653884	NOTCH2NL							9.16645e-10	0.356371	VAMP8	5.65969e-15	2.16633	HACE1	1.96124e-10	3.33251	QPRT	0.000567773	0.605179	RBFA	0.000867583	0.531077	SGK1	8.21108e-12	2.78167	NLRC3	1.32042e-10	1.20133	SYK	8.7452e-06	0.878023	KIAA1683
0.00142006	0.329742	EMX2	2.2957e-05	0.800324	AGK	0.0024699	0.364407	TUSC2	0.00436324	1.10674	RGS16	2.3574e-07	1.02667	TMEM229B							9.30761e-10	0.484696	TMEM120A	5.67717e-15	1.77068	WDR90	1.98704e-10	1.07671	PIK3C2B	0.000579713	0.348029	NUPL2	0.000874935	0.904771	LIMS1	8.63514e-12	0.538357	FOPNL	1.37744e-10	0.26963	HMGN4	1.17914e-05	0.448971	GCN1
0.00142225	0.374674	RUBCN	2.37698e-05	0.304742	BIN1	0.00265328	0.515952	GTF2IRD2B	0.00455737	1.18403	GLDC	2.36725e-07	1.37182	TRIM73							9.78027e-10	0.390639	SDHA	5.92388e-15	4.7244	DDX60L	2.11223e-10	0.591211	DPY19L3	0.000658637	0.378089	C4ORF33	0.00090764	0.952088	A2ML1	8.76627e-12	0.409793	IDI1	1.4496e-10	0.489067	GABARAPL2	1.30688e-05	0.283334	IPO7
0.00142974	0.347848	PDE3B	2.40083e-05	0.302475	SSU72	0.00269174	0.35786	PRCP	0.00458489	0.612781	CENPF	2.54459e-07	1.09817	PRIM1							1.09137e-09	0.264686	PSMD8	6.12704e-15	2.22957	SUZ12P1	2.21097e-10	0.917726	MSTO1	0.000697965	0.41796	POLR2J2	0.000917319	0.814546	ABCB9	8.78759e-12	0.252243	TRMT112	1.4809e-10	0.454788	NKG7	1.32027e-05	0.306495	APOL1
0.0014504	0.315544	PBXIP1	2.40655e-05	0.452419	UPF2	0.00274266	0.265883	GTF2F1	0.00460166	0.297989	MRPS15	2.63888e-07	1.17294	MTRF1							1.09263e-09	0.896281	GLB1	6.66071e-15	0.550851	BIRC3	2.29594e-10	0.866963	SSH1	0.000707185	0.564975	GALNT1	0.000923508	0.623953	CDK4	1.2803e-11	0.765971	TMEM44	1.48258e-10	0.411282	KCTD5	1.34499e-05	0.304758	NEU3
0.00145683	0.498692	RGMA	2.4273e-05	0.450206	RNF20	0.00275129	0.311864	EPG5	0.00464726	0.62526	FH	2.69528e-07	1.54087	ZNF559							1.11928e-09	0.668384	ZBTB24	6.97337e-15	3.2312	STK10	2.3213e-10	0.387604	SRA1	0.000802254	0.705862	RBM18	0.000925398	0.732187	PEA15	1.35843e-11	0.256198	MAPK1IP1L	1.48318e-10	1.22268	SNX27	1.42464e-05	0.570143	SEC24A
0.00147496	0.294989	ATG9A	2.43513e-05	0.383292	ATG13	0.00275949	0.446306	GALNT1	0.00481847	0.281757	GATA3	2.71576e-07	0.758159	LONP2							1.23287e-09	0.448631	USP47	7.14938e-15	1.5132	NASP	2.34922e-10	0.984134	GOLGB1	0.000849739	0.612777	ISY1	0.000933534	0.440496	TMEM261	1.38517e-11	1.28876	FAM83F	1.62985e-10	1.48149	PITPNM1	1.65634e-05	0.306772	TULP4
0.00151607	0.380051	ZNF419	2.46406e-05	0.307154	ICAM3	0.00281144	0.340461	CCNH1	0.00491035	0.302564	UQCRB	2.71914e-07	0.784904	MBD5							1.25049e-09	0.729683	LINC00426	7.16453e-15	1.00765	GTF2IRD2	2.51208e-10	0.450527	LYSMD3	0.000868147	0.669457	BRCA2	0.000938047	0.589901	MZT2B	1.39535e-11	2.01998	RGS3	1.6305e-10	0.663319	TAPBPL	1.8096e-05	1.23786	ARHGEF39
0.00158216	0.281405	EMP2	2.46706e-05	0.366235	ZFAND1	0.0028167	0.656499	SMAP1	0.00504667	0.452234	ABCD2	2.7656e-07	0.758613	U2SURP							1.26577e-09	0.574068	PCYOX1L	7.24865e-15	1.76923	XAF1	2.55245e-10	0.60895	COX7A2	0.000890938	0.540582	SUSD6	0.000950238	0.90879	SESTD1	1.46456e-11	0.65468	RALY	1.68588e-10	0.796332	SMIM4	2.00537e-05	0.644567	FLYWCH2
0.00158951	0.524561	TRABD2A	2.48517e-05	0.48897	LINC00547	0.00287528	0.427683	FAM228B	0.00508624	0.357919	TAF2	2.94112e-07	1.23174	PSMD5-AS1							1.31083e-09	0.563025	PRKAR1A	7.44213e-15	3.02653	CD96	2.62201e-10	4.60859	F2R	0.00097102	0.324353	DSTN	0.000954986	0.549803	ATG7	1.50576e-11	1.66455	JAKMIP2	1.71293e-10	1.21249	AP5B1	2.05635e-05	0.9355	NQO1
0.00167116	0.488929	NDUFA4	2.57706e-05	0.461612	SETD3	0.00288239	0.881862	AXL	0.00516122	0.306814	HCST1	2.94404e-07	0.91052	NUP88							1.3615e-09	0.792504	PSME4	7.46058e-15	1.43351	FUS	2.75767e-10	0.410657	ITFG1	0.000972391	0.901568	SCD	0.000972159	0.627938	FAM193A	1.57976e-11	0.463656	TMEM50B	1.73512e-10	1.08713	ARAP2	2.71407e-05	0.477002	RFT1
0.00168511	0.280913	FAU	2.58425e-05	0.325968	RFC1	0.00290313	0.390841	ARNTL	0.00519561	1.6349	NT5DC3	2.9923e-07	0.830115	CEBPZOS							1.37608e-09	0.321706	ATP5G3	7.52297e-15	1.30407	LIPG	3.09905e-10	1.28593	SGK1	0.000976802	0.28076	RBBP7	0.000973898	2.10249	PPP1R3B	1.58489e-11	0.875187	IFT57	1.8425e-10	0.305373	SYNE3	2.72162e-05	0.272312	CD180
0.00170731	0.442044	CACYBP	2.68616e-05	0.467845	ABTB1	0.00293346	0.307217	ATXN2	0.00549008	0.375965	LGALS1	3.07305e-07	1.32285	ZNF345							1.40572e-09	0.955643	MSI2	7.69576e-15	0.696539	GDPGP1	3.72705e-10	0.537419	PPA1	0.00104532	0.843262	MCM4	0.000994876	0.949494	OPA3	1.71541e-11	0.309151	TROVE2	1.90117e-10	0.791324	PFDN5	3.01295e-05	0.792834	RHOBTB3
0.00173523	0.406362	FOXO3	2.69424e-05	0.674425	ISCA2	0.00296149	0.579666	HEBP2	0.0055871	0.267175	AKAP11	3.10558e-07	1.18929	GTF2IRD2B							1.44972e-09	0.355241	PSMC3	8.04633e-15	2.18524	CUL3	3.79195e-10	0.475533	PDP2	0.00105204	0.260059	AHCY	0.00100159	0.939004	EGLN2	1.74685e-11	1.79048	BMPR1A	2.05922e-10	1.57761	PPM1F	3.09457e-05	0.383789	APOL2
0.00173596	0.439113	SCAF11	2.69598e-05	0.278892	VDAC3	0.00296961	0.438357	SLC27A1	0.00573748	0.252897	C18ORF32	3.30137e-07	1.71054	C1RL							1.46916e-09	0.628986	SAR1B	8.32376e-15	0.53923	DSEL	3.8053e-10	0.321683	KRT10	0.00108473	0.28478	ANXA2	0.00103639	0.947356	BRD7	1.92735e-11	0.440726	LINC00963	2.13084e-10	0.589872	STAU1	3.28594e-05	1.05121	ACBD3
0.00175193	0.289218	ACKR2	2.74626e-05	0.5604	GLTP	0.00298976	0.344943	GNB5	0.00575124	0.467946	SLC2A8	3.34517e-07	0.350652	ZNF37BP							1.52446e-09	0.435278	PFKL	8.60176e-15	1.63232	KANK2	3.91139e-10	0.998766	HIST3H2BB	0.00110155	0.389544	APOOL	0.00104267	1.40411	DYNC1LI1	1.93437e-11	0.744135	SLC10A3	2.15346e-10	0.79076	ZNF354B	3.29017e-05	0.354058	LAMP3
0.00176323	0.524458	GLUL	2.75676e-05	0.306939	FAM172A	0.00303611	0.383814	RBM471	0.00586837	0.394139	TRIM26	3.43605e-07	0.863435	AGK							1.53263e-09	0.674063	PLGRKT	9.00944e-15	1.30573	USF3	4.91984e-10	0.33765	TYMP	0.00112645	0.420523	GTPBP1	0.00105032	1.32608	IL7R	1.94407e-11	0.374583	HNRNPDL	2.16595e-10	0.90824	ZNF518A	5.08133e-05	0.369463	C5ORF24
0.00181601	0.349785	PHACTR2	2.76401e-05	0.453617	UQCR11	0.00305592	0.387998	DNAJC4	0.00592227	0.327087	LSM7	3.54128e-07	1.04114	ZNF512							1.54521e-09	0.383723	NPC1	9.06559e-15	0.805704	MEFV	5.02181e-10	0.897821	REPS2	0.00112828	0.486563	ZNF585A	0.00105552	0.537749	TIGD1	2.01875e-11	0.734337	PIK3R3	2.23585e-10	1.30742	ANKRD13A	5.66552e-05	0.788974	HSPA6
0.00184271	0.452544	INO80E	2.77564e-05	0.290821	NBPF10	0.00310449	0.672361	TVP23C	0.00596503	0.322199	GAS51	3.55023e-07	1.33011	DNMT3A							1.57889e-09	0.824226	TIMP1	9.46647e-15	2.91165	SH2D3A	5.24888e-10	1.02883	RPS6KB2	0.00113178	0.312825	HDAC2	0.00106496	0.486005	USP33	2.11194e-11	0.479636	SUOX	2.41408e-10	0.532149	TBC1D9B	5.83849e-05	0.425969	H2AFX
0.001871	0.415935	C16ORF54	2.8471e-05	0.253978	SNX14	0.00316554	0.883669	MAN1C1	0.00612044	0.258433	SZRD1	3.55798e-07	1.3042	TRMT61B							1.71909e-09	0.486955	RTCB	9.78586e-15	0.563448	2022-09-09	5.30443e-10	1.16142	NME3	0.00118626	0.424298	CLPP	0.00108485	0.598166	SPI1	2.37397e-11	0.552568	DNAJC19	2.42472e-10	1.38545	ZCWPW1	6.06238e-05	0.424316	CBLB
0.00191139	0.963078	SNRPF	2.86845e-05	0.472527	MAP3K7	0.00336751	0.273428	SCAF8	0.00616893	0.252641	CHST121	3.60815e-07	0.31193	ITM2B							1.78184e-09	0.374565	TCF12	1.065e-14	2.24163	ATXN3	5.42723e-10	1.07158	CPA3	0.00119326	0.881393	ST18	0.00113545	0.862318	DDX60L	2.40812e-11	0.39511	KLHL6	2.47428e-10	1.53537	2022-03-05	6.13604e-05	0.309017	ARIH1
0.00200268	0.350195	LINC01531	2.87218e-05	0.602486	ZNF720	0.00342713	0.646446	CCDC13	0.00636375	0.287228	CD151	3.71482e-07	1.23558	KIAA0586							1.86406e-09	0.610011	ZFYVE28	1.09441e-14	3.43059	FAM26F	5.45996e-10	0.683614	PPP1R15A	0.0011967	0.254688	LYPLA2	0.00114703	0.28576	ATP6V1E1	2.45734e-11	0.717356	ZNF618	2.546e-10	0.397295	CAMTA1	6.54027e-05	0.306572	MRPS11
0.00205802	0.694131	STK38L	3.02749e-05	0.721424	SNUPN	0.00343246	0.288039	RAB30	0.00659245	0.253072	RASGRP1	3.75875e-07	0.81767	CDKL3							1.94307e-09	0.438203	RFTN1	1.12118e-14	0.920699	MOB3B	5.59065e-10	0.671923	MANBAL	0.00120043	0.623762	KEAP1	0.00114984	0.998737	BCL7A	2.8436e-11	0.337247	SMC4	2.54807e-10	1.13941	PYGL	6.65047e-05	0.267094	CLCC1
0.00206589	0.410552	CDH13	3.06191e-05	0.29099	PYURF	0.00345079	0.412679	TNFRSF25	0.0066334	0.560219	SCPEP1	3.77775e-07	0.924621	URB1							2.03458e-09	0.258409	TAGLN2	1.15798e-14	1.41263	ZNF284	5.61773e-10	0.891695	HPSE	0.00126805	0.258262	CNIH1	0.00116375	0.545435	OSBPL2	2.91078e-11	0.695862	SPAG16	2.57341e-10	0.434628	RPL32	6.76836e-05	0.584867	SGTB
0.00208538	0.349581	NBPF9	3.09046e-05	0.877752	NT5DC1	0.0034938	1.09638	LRP12	0.00672575	0.568352	NPAP1	3.93712e-07	0.822623	ZNF429							2.06916e-09	0.717113	CNTLN	1.223e-14	2.15811	SKAP2	5.84584e-10	0.724431	TRADD	0.00130602	0.568113	IL7R	0.0011794	0.983906	WAS	2.97337e-11	0.457085	DPY19L1	2.58384e-10	0.681988	ATXN10	8.36124e-05	0.484224	DOCK7
0.00209573	0.659347	FADS6	3.13917e-05	0.809073	ATXN7L1	0.00351457	0.546539	CREB3L2	0.00673898	0.351551	CHORDC11	4.1206e-07	0.416427	DPP4							2.08204e-09	0.526052	TMEM205	1.22755e-14	1.54042	NBPF10	6.00501e-10	0.264684	DUSP22	0.00132316	0.266073	PSMC4	0.00119807	0.383001	TMEM167B	3.26398e-11	0.554317	SLFN5	2.64395e-10	0.335693	MGAT2	8.56904e-05	0.547016	EIF3J
0.00211413	0.697211	RNF24	3.16397e-05	0.394361	LAMTOR2	0.0036346	0.596604	TMEM67	0.00700177	0.571405	CIITA	4.21354e-07	0.585781	MBNL1							2.18359e-09	0.360241	IFT27	1.23384e-14	0.693478	LRRC74B	6.02669e-10	0.70481	PCBD1	0.00134465	0.396781	TCOF1	0.00120936	0.562431	MON1B	3.8965e-11	0.367364	IPO11	2.76997e-10	1.29444	ULK2	9.01326e-05	0.323725	HFE
0.00223972	0.721199	SLC5A3	3.43526e-05	0.409622	NCBP2-AS2	0.00365948	0.30476	GTPBP4	0.00716955	0.396861	TRMT2A	4.24062e-07	0.301588	GSTK1							2.21181e-09	0.296918	TAB2	1.30466e-14	0.700761	ABCG1	6.60994e-10	0.41725	AAAS	0.00135508	0.662276	MED21	0.00121941	0.758388	CABIN1	3.93753e-11	0.325891	ZNF511	2.86782e-10	0.949716	PDK4	9.21656e-05	0.293851	DNAH17
0.00238969	0.385294	SPAG9	3.53052e-05	0.651512	ALG1	0.00384624	0.330907	DNPH1	0.0072264	0.310843	ELMO2	4.28645e-07	0.774178	HIST1H1E							2.28915e-09	0.52453	SNRPC	1.34061e-14	0.622273	RPL4	7.03095e-10	1.30143	PDE3B	0.00136257	0.455621	SESN3	0.00121961	1.03386	TXLNA	4.11235e-11	0.328908	LIG3	2.9076e-10	0.337824	LINC01531	9.23131e-05	1.42363	HTRA4
0.0023913	0.749486	PLEKHG1	3.5375e-05	0.467936	PHF21A	0.00392321	0.821438	IL18R1	0.00744202	1.19613	FEM1B	4.30226e-07	1.32794	UBE3D							2.30976e-09	0.925164	EIF3J	1.40607e-14	1.07666	ZNF273	7.43188e-10	0.484314	CD3G	0.00152788	1.76708	ZNF721	0.00122135	1.78873	MIR137HG	4.32208e-11	0.423412	DR1	2.93533e-10	0.943624	SERPINB6	9.26586e-05	0.422331	TSC22D2
0.00244496	0.355095	UPP11	3.5461e-05	0.291692	CA5B	0.00393386	0.273784	PRNP1	0.00746647	0.29707	ASNSD1	4.33155e-07	0.499654	PIGN							2.3197e-09	0.866464	BTN2A2	1.54756e-14	3.00975	ERICH1	8.07192e-10	0.714384	CYB5RL	0.00153602	0.610296	FKBP5	0.00123047	0.865332	SIPA1L1	5.40193e-11	0.413919	TPST2	3.00255e-10	0.384081	SSBP1	9.50816e-05	0.268255	LINC00921
0.00248323	0.410583	MAP1LC3B	3.6693e-05	0.334141	NOCT	0.00395342	0.794111	KCP	0.00752014	0.271836	POLR2F	4.43861e-07	1.52494	AKAP7							2.46494e-09	0.26075	CHMP5	1.67147e-14	3.19126	ALOX5AP	8.31818e-10	0.369343	CCDC186	0.00153997	0.349559	SEPHS2	0.00123259	1.19852	DNAAF1	5.49583e-11	0.633461	TBPL1	3.05231e-10	1.31994	CCDC69	9.61574e-05	0.653548	BNIP3
0.00249161	0.364376	CPEB1	3.71077e-05	0.440702	NOL12	0.0040242	0.372418	NFKB11	0.00763528	0.306609	EIF2S1	4.45542e-07	0.756762	EHMT2							2.47547e-09	0.285992	ARF1	1.76671e-14	1.33866	ACSM3	8.64426e-10	0.323207	HIPK2	0.00156698	1.32601	P2RY8	0.00123824	0.330684	FAM160B2	5.49697e-11	0.540036	TAPBP	3.13594e-10	0.372506	CDIP1	0.000101656	1.70213	SRGAP1
0.00254582	0.577876	TOP1	3.73766e-05	0.752034	KCTD7	0.00420174	0.353315	FAM118A	0.00809352	0.307342	SMARCA51	5.10493e-07	1.04365	UQCC1							2.50922e-09	0.513113	LST1	1.81608e-14	1.25583	SYNGR2	8.83779e-10	0.679261	NEGR1	0.00163673	0.522955	RAD21	0.00125831	0.277805	PLEKHB2	5.49981e-11	0.615423	HAVCR2	3.18497e-10	0.531722	RPN1	0.000114998	0.311827	NDRG1
0.0025658	0.441957	OSBPL10	3.75873e-05	0.604652	ITSN1	0.00422315	0.503974	KIF23	0.00817886	0.411843	ALDH3A2	5.39262e-07	1.07707	MMS19							2.72842e-09	0.380587	WDR83OS	1.81783e-14	2.20328	TOB2	8.99356e-10	2.23469	ITGA11	0.00167283	2.06873	MZB1	0.00127015	0.254367	MEMO1	5.96675e-11	2.14138	PDE3A	3.31527e-10	0.706394	BCL2L11	0.0001209	0.36792	NGRN
0.00257135	0.425067	WDR97	3.76641e-05	0.653643	MCM3AP	0.00426345	0.253702	ZNF791	0.00818811	0.441112	ATG2B	5.44143e-07	0.941624	CCDC141							2.8105e-09	0.293116	TMEM14A	1.82943e-14	0.597168	FAU	9.37359e-10	0.638514	FH	0.00169769	0.408164	FAM32A	0.00127785	1.30528	TP53INP2	6.03037e-11	0.338388	GABBR1	3.32742e-10	1.07026	LYN	0.000126417	0.376471	SPDYE5
0.00261025	0.450458	COX6B2	3.94038e-05	0.353476	ZNF808	0.00444929	0.361973	GPR108	0.00824218	0.581795	GMDS1	5.46576e-07	1.01417	KRIT1							3.15992e-09	0.503247	CASK	1.85409e-14	1.65467	ORC4	9.40885e-10	0.260543	PYGL	0.00176771	0.468004	TBC1D32	0.00133357	1.17392	COQ2	6.30091e-11	0.250614	QPCTL	3.37444e-10	0.439951	ROCK1P1	0.000131862	0.948768	FKBP4
0.00266059	0.663715	ARHGAP5	4.0338e-05	0.413644	IMP3	0.00448554	0.375465	CDC14A	0.00851818	0.596067	RFC4	5.62174e-07	0.649239	NARFL							3.41349e-09	0.715251	CNST	1.87833e-14	1.62825	VPS13C	9.44221e-10	0.600109	PRRC1	0.001843	0.582328	ZZZ3	0.00133499	0.490266	GBP2	7.60301e-11	0.969091	CCDC127	3.45939e-10	0.890866	PTGER2	0.000215583	1.05123	SPRYD7
0.00267077	0.774667	KDM7A	4.17924e-05	0.396727	M6PR	0.00471986	0.256636	UGP2	0.00867587	0.305314	PPM1M1	5.81473e-07	0.31985	MT-ND5							3.48007e-09	0.393243	PYCARD	1.9131e-14	1.80629	UBXN1	1.00671e-09	0.355701	EDF1	0.00190524	0.328852	WDR59	0.00137415	1.23858	TMEM119	7.96712e-11	0.350575	U2AF1	3.5877e-10	1.33381	SIRT7	0.000268614	0.444638	TFDP2
0.00270439	0.896493	ANTXR2	4.21002e-05	0.295179	FOXN2	0.00476349	0.36337	FAM86DP	0.00902762	0.657497	PIK3CG	5.97748e-07	1.15911	GSTM2							3.49942e-09	0.648295	HSD17B10	1.91418e-14	0.889151	KIAA0355	1.12289e-09	0.996648	LRG1	0.00191651	0.500598	UTP11	0.00138161	0.352802	BCL7C	1.05123e-10	0.306116	AMZ2P1	3.62633e-10	0.260727	PTBP1	0.000311738	0.757315	EEF2K
0.00275315	0.49483	EIF5B	4.2293e-05	0.591698	SPDYE3	0.00478027	0.381567	DCTD	0.0090797	0.390265	THOP1	6.28675e-07	0.285293	SUMF1							3.53034e-09	0.490713	TADA3	1.9266e-14	1.88996	MYH11	1.21806e-09	1.23061	MPZL1	0.00200087	0.741962	PPM1D	0.00139648	0.430906	MSX1	1.05895e-10	0.35769	ASRGL1	3.72289e-10	1.14375	ZNF688	0.000353256	0.551972	PHYH
0.00279139	0.546919	GLB1L	4.24893e-05	0.409159	EAPP	0.00487451	0.991707	SCART1	0.00913011	0.409902	CLN5	6.4178e-07	0.459742	ZNF649							3.76185e-09	0.302165	UBE2D2	2.02603e-14	2.03116	VAV3	1.27103e-09	1.02719	PCSK6	0.00205969	0.681335	COPS5	0.00142288	0.951559	FPR3	1.21886e-10	0.52572	SRSF1	3.76483e-10	1.37135	PIEZO1	0.000355421	0.266576	CCDC124
0.00280406	0.344033	MLPH	4.26824e-05	0.574264	CUL4B	0.00490911	0.429911	SIPA1L1	0.00950296	0.300514	DNMT3A	6.50084e-07	1.3688	TMEM25							4.01429e-09	0.624256	GPCPD1	2.07386e-14	2.23571	RABEP1	1.43601e-09	1.52835	FKBP14	0.00206619	0.297185	SDHAF2	0.00142309	0.946856	HELB	1.29908e-10	0.526465	TMED2	3.91822e-10	0.831917	NKTR	0.000391439	0.313149	FAM210B
0.00284431	0.544933	GDAP2	4.28834e-05	0.253053	GOLGA4	0.00515148	0.81149	ALS2	0.00962222	0.301477	ZNF622	6.55756e-07	0.51427	NUDCD3							4.06849e-09	1.60494	PLEKHG2	2.23698e-14	2.03442	NT5C	1.45761e-09	0.371133	SLC14A2	0.00207954	0.67058	MZT2A	0.0014385	0.275947	CHMP2B	1.8595e-10	0.523448	CARM1	4.07064e-10	0.6385	CYB5R1	0.000541107	1.0438	KCP
0.00285746	0.314426	CLK4	4.3814e-05	0.48271	NDUFC1	0.00518036	0.721776	POLR2A	0.0096776	0.560486	SCIN	7.21401e-07	0.288787	SCYL3							4.19545e-09	0.621508	SERPINB10	2.40668e-14	3.97139	CD84	1.47399e-09	0.909984	TMEM19	0.00209051	0.588407	ACOT7	0.00144386	1.22226	CASP2	1.88233e-10	0.58618	IDH3G	4.33831e-10	0.271892	TMED7	0.000553278	0.514084	NXF1
0.00286595	0.254718	TPRG1	4.44048e-05	0.383821	BCL2L1	0.00532281	0.771321	CD83	0.00997886	0.258928	PTGR2	7.31827e-07	0.358316	HTN3							4.32709e-09	0.815697	GABARAPL1	2.53476e-14	0.4046	INTS3	1.50726e-09	0.630049	FAM173A	0.00209525	0.261639	FASTKD1	0.00146658	0.320435	SMG1P7	1.93209e-10	0.353293	IP6K2	4.34463e-10	2.50707	CC2D2A	0.000579767	0.357818	HIST1H4C
0.00289867	0.401543	UBXN2A	4.54067e-05	0.404388	CTBP1	0.00534298	0.832754	LRRC8C				7.49369e-07	1.21592	MRI1							4.59898e-09	3.31275	PDGFA	2.69299e-14	0.355552	TLCD2	1.52965e-09	0.826724	ZNF347	0.00210836	0.404111	EFCAB14	0.0014742	0.53102	CARHSP1	2.33347e-10	0.273557	DDX6	4.44337e-10	0.349456	TRPM2	0.000588254	0.97725	FAM210A
0.00293543	0.526227	PHF20L1	4.68462e-05	0.373254	GBP1	0.00537692	0.466234	RBM12				7.52553e-07	0.26095	TBP							4.95809e-09	0.328626	ALG8	2.71285e-14	0.32004	ATP6V0D2	1.57013e-09	1.2178	ELMOD2	0.00223822	0.327486	TOR1AIP1	0.00147913	0.354949	GSPT1	2.44464e-10	0.504804	RAVER1	4.46638e-10	0.927916	MIR663AHG	0.000647948	0.27869	GBE1
0.00296552	0.458482	NSMCE3	4.72516e-05	0.473971	UBLCP1	0.00537776	0.296749	DERL1				7.69377e-07	0.757535	SCRN2							4.97849e-09	0.362499	COPZ1	2.74808e-14	0.494001	TCF23	1.58126e-09	1.17854	NDUFB3	0.0023732	0.515889	SLC35A5	0.00147924	0.930073	PUM1	2.56699e-10	0.327104	STOML2	4.50802e-10	0.596014	RPS8	0.000676915	0.467511	JDP2
0.00296865	0.901159	CASC15	4.93762e-05	0.384351	JAKMIP1	0.0055992	0.250017	LIX1L				7.7434e-07	1.93191	ZNF181							5.26587e-09	0.387918	STAT3	2.81337e-14	2.46816	PHF20	1.7344e-09	0.306461	SRP68	0.00253532	0.301321	THOC3	0.00148962	0.32939	ELF1	2.78814e-10	0.448391	PLA2G16	4.54542e-10	1.33374	SLC35A1	0.000714705	0.968589	TSKU
0.00297171	0.390634	MAGI2	4.96692e-05	0.270677	PAGR1	0.0057072	0.302195	AP4B1				7.76223e-07	1.19897	REV1							5.41606e-09	0.731861	SDF2L1	2.96162e-14	1.86709	TAC4	1.8176e-09	0.685151	ARFIP2	0.00253813	0.374944	INF2	0.00149172	1.63815	SRA1	2.87512e-10	0.403749	CACYBP	4.73074e-10	0.32337	MTR	0.000744404	0.504431	SPARC
0.00310098	0.454098	EYS	5.0869e-05	0.635626	WAS	0.00574443	0.639942	PIK3R3				8.05916e-07	1.01304	C5ORF51							5.45026e-09	0.364028	PPP1R12B	2.9706e-14	1.62443	ADD3	1.90452e-09	2.86885	CCDC113	0.00273037	0.450748	RABL3	0.00149204	0.614413	ZKSCAN8	2.93682e-10	1.99078	TINAGL1	4.74181e-10	0.507814	TDG	0.000764673	0.285277	UBE2Q2
0.00311622	0.534207	CASC3	5.19514e-05	0.632056	NSMCE4A	0.00591469	0.432071	NAT10				8.16949e-07	0.769746	C2							5.52406e-09	0.515463	HTRA2	3.00834e-14	1.89757	RFX5	2.16937e-09	0.532705	UBE2G1	0.0027306	0.327507	TAF6	0.00149738	0.479871	ZNF800	3.43638e-10	0.571028	C6ORF62	4.7671e-10	1.34926	KIAA0319L	0.000859697	0.287777	MPI
0.00320105	0.375221	SLC2A1	5.34275e-05	0.404026	TRIP11	0.00592924	0.347345	ANKRD54				8.24501e-07	0.952234	NAE1							6.05985e-09	0.521782	JAZF1	3.17059e-14	0.60961	RBMS2	2.34655e-09	0.641192	HELB	0.00292336	0.324295	TVP23A	0.00149971	1.36994	HSD17B2	3.50039e-10	0.520635	RRAGA	4.82447e-10	0.580316	MRPL52	0.00088429	0.337191	SCN1B
0.00337604	0.478052	PPM1D	5.36052e-05	0.496842	TRNT1	0.00601109	0.45349	PDLIM5				8.51647e-07	0.599106	FBXL4							6.08108e-09	0.272661	RBM42	3.27764e-14	0.82958	CA5A	2.48302e-09	0.777818	IFT20	0.00301219	0.347991	ABHD14B	0.00150316	0.420547	SYNCRIP	3.9123e-10	1.15211	PSMC1	4.83841e-10	0.538076	PSMD11	0.000913434	0.640502	LSAMP
0.00341055	0.258399	ABCG1	5.42666e-05	0.892363	ZBED5	0.00604526	0.335473	RAVER1				8.56741e-07	0.845177	CCDC28B							6.23248e-09	0.323773	BOLA2	3.51365e-14	1.87411	MGA	3.17823e-09	1.30418	QPCTL	0.00314974	0.621688	RECQL	0.00151428	0.549521	RRP1	4.29455e-10	0.841903	RNF19A	4.84587e-10	0.252286	TBK1	0.00102883	1.45373	METTL21B
0.0034363	0.406682	TMEM71	5.43782e-05	0.323208	CCDC107	0.00608934	0.548728	EMC1				8.61406e-07	0.913817	SLC35E2B							6.66843e-09	1.23276	KSR1	3.58513e-14	1.05619	ZNF480	3.88648e-09	0.630082	EFCAB6	0.00319791	0.630686	RAB5A	0.00154462	1.72247	MIR646HG	4.44674e-10	0.631256	SMARCA5	4.85954e-10	0.801919	PALLD	0.00111307	0.619012	IL32
0.00344057	0.435269	GBP1P1	5.47152e-05	0.27191	GOLGA5	0.00612939	0.275661	TATDN3				8.93237e-07	0.608248	CCDC90B							6.71498e-09	0.908705	MTHFD1	3.61981e-14	1.79545	PCM1	4.2146e-09	0.330314	STXBP4	0.00325928	0.395342	PMVK	0.00157093	0.599665	STX3	5.55802e-10	0.285102	FAM177A1	5.18656e-10	0.572552	ZBTB21	0.00118144	0.376336	GAN
0.00344129	0.471135	UBE2D1	5.5236e-05	0.925459	RPUSD3	0.00626484	0.278342	ZNF146				9.04339e-07	0.477436	SNUPN							7.08762e-09	0.271276	RFX5	3.66665e-14	0.926382	DPPA4	4.6287e-09	0.634581	MTIF3	0.00330453	0.563327	PTRH2	0.0016264	0.293436	HPS3	5.72981e-10	0.542987	LPCAT3	5.37162e-10	0.31318	PRCP	0.00125768	0.30437	HDDC2
0.00349013	0.680862	KDM3A	5.74762e-05	0.395916	TXN2	0.00641355	0.383675	HNRNPAB				9.12519e-07	0.603763	STAG3							7.57376e-09	0.587392	IFI30	3.68875e-14	1.34478	MYCBP2	4.63015e-09	1.00349	GALK1	0.00343495	0.38759	COMMD5	0.00162783	0.361185	TRIP12	5.81543e-10	0.989642	PARP15	6.2524e-10	1.24902	SH3GLB2	0.00128921	0.607001	ZNF747
0.00351095	0.550878	MANSC1	5.78071e-05	0.296087	DNAJC8	0.00648646	0.531217	EFCAB5				9.59827e-07	0.511778	PAICS							7.77341e-09	0.389702	CLTA	3.83212e-14	3.09346	BCL6	5.32325e-09	0.396254	CDK5RAP3	0.00349532	0.362044	DCTD	0.00164019	0.431668	FMNL1	5.91022e-10	1.26336	TUBA1A	6.27497e-10	0.841434	KIAA1328	0.00132493	0.648319	DDX24
0.00352182	0.464627	PRKCQ	6.16366e-05	0.417244	ITGB1BP1	0.00650943	0.41744	PNO1				9.76246e-07	0.817279	IFIT5							7.83889e-09	0.392233	CCNDBP1	3.84662e-14	2.1016	AIM2	5.41131e-09	1.07121	NLN	0.00350185	0.915925	ZNF250	0.00164371	0.256796	CAMTA1	6.00592e-10	2.3251	STRIP2	6.73869e-10	0.481596	MATR3	0.00134626	1.00603	ICA1
0.00352199	1.00631	GCNT4	6.16868e-05	0.423146	TRADD	0.0066771	0.760523	CAPN12				1.01395e-06	1.26925	ATP8B1							7.97519e-09	0.645769	CLIP1	4.01368e-14	1.02929	ADAMTSL3	5.66096e-09	0.439359	FAM221A	0.00364586	0.313569	SERTAD2	0.00164503	1.12255	ZNF542P	6.4551e-10	3.90286	ELOVL6	6.8803e-10	0.384551	ASPH	0.0016254	0.487808	TRMT10C
0.00355418	0.661896	ZMYND11	6.19042e-05	0.497483	SLC30A2	0.00680437	0.532473	2022-03-31				1.04325e-06	1.07162	MYO9A							8.3151e-09	0.830233	UCHL3	4.04134e-14	1.93235	PLEKHF2	6.28428e-09	1.53378	KLF13	0.00371397	0.412047	LYZ	0.00166508	1.01865	TRAPPC8	6.50188e-10	1.05917	BTN3A2	7.08869e-10	0.780679	STAT2	0.00167999	0.25635	BTBD9
0.00358767	0.682142	TTPAL	6.22472e-05	0.664655	SNHG20	0.00703616	0.360461	ZNF124				1.05231e-06	0.931467	C12ORF45							8.76007e-09	0.686486	CD320	4.04297e-14	2.4469	CEP170	6.97822e-09	0.402412	NELFE	0.0042413	0.37653	RMND5A	0.00168375	0.74689	STK10	6.50762e-10	0.720403	RGPD8	7.27553e-10	0.433682	RSRC2	0.00168256	0.660564	CD3G
0.00358812	0.742148	SNX30	6.31267e-05	0.562735	MRPS18C	0.0072956	0.256102	C9ORF66				1.07025e-06	0.365242	CD48							8.82483e-09	0.547357	FBRS	4.07051e-14	2.37587	BRI3BP	7.04844e-09	0.971932	NFKBIA	0.00430498	0.320744	RNF122	0.00168741	1.05385	LMBR1L	7.06268e-10	0.347317	TNFAIP8	7.32593e-10	1.55791	TLR5	0.00175837	0.757884	MXRA7
0.00362412	0.620809	PPP1R3B	6.34686e-05	0.576726	CHTF8	0.00733296	0.330188	RASA4B				1.07672e-06	0.762655	XPO6							9.33521e-09	0.491621	DGKH	4.14143e-14	3.29673	BMP2K	7.09493e-09	0.500851	FASTK	0.00430504	0.824887	NUDT19	0.00168976	0.368426	DSCR3	7.09193e-10	1.3373	ACVR1B	7.34939e-10	0.574654	TIMM10	0.00180668	0.262923	STPG1
0.0036319	0.682742	SGTB	6.37992e-05	0.448084	LLGL2	0.00740645	0.606616	PHYH				1.07672e-06	0.755491	PSMB8-AS1							9.76819e-09	0.296946	NRBP1	4.18081e-14	1.10305	ZNF667	7.25068e-09	3.95618	VWA5A	0.00444937	0.422984	STT3B	0.00171749	0.605117	ZNF471	7.42585e-10	0.290167	POLR3C	7.67012e-10	0.86139	KCTD12	0.0018136	1.40339	HN1L
0.00365136	0.313923	CHRAC1	6.38738e-05	0.274293	SH3BGRL	0.00776555	0.429148	DGKE				1.09484e-06	1.00431	MYBBP1A							1.03836e-08	0.374256	TMED9	4.3138e-14	0.342923	HSD17B1	7.33866e-09	0.427297	GPR35	0.00449381	0.463221	SRD5A3	0.00173801	0.505035	PURB	7.45149e-10	0.326627	WSB1	7.8128e-10	0.536968	PSMA1	0.00183893	0.475427	GPR89B
0.0036578	0.775933	PHLPP2	6.54383e-05	0.458879	SNAP23	0.00786318	0.36099	CSPP1				1.10627e-06	0.704851	NT5DC1							1.04972e-08	0.918509	MX1	4.62695e-14	1.27955	ZNF266	7.52724e-09	0.683903	CTBS	0.00454358	0.941041	REV3L	0.00176636	1.36411	MYLK3	7.76098e-10	1.93689	NRXN1	7.9328e-10	0.782996	TSC22D3	0.00226963	0.356811	KDM1A
0.00367211	0.33531	TIGAR	6.54915e-05	0.361386	BVES	0.00787045	0.54228	PPP5C				1.12326e-06	1.18487	UBTF							1.09384e-08	0.4775	PDIA6	4.65139e-14	0.643616	LAMA4	7.5664e-09	0.308124	CHST6	0.00468378	0.33701	BICD2	0.00177693	0.661836	BACH2	7.92748e-10	1.1363	2022-09-01	8.22738e-10	0.723427	SIL1	0.00244024	0.265566	CYBRD1
0.00372196	0.571721	GGT5	6.5877e-05	0.302945	TSN	0.00789931	0.288869	TRAPPC2B				1.12708e-06	1.0203	ZNF26							1.12616e-08	0.268154	TRAPPC1	4.77365e-14	1.46673	FBXW11	7.98457e-09	0.46936	ANKRD36B	0.00473784	0.3851	SMN1	0.00179722	0.278826	VRK2	9.24483e-10	0.95354	WDR89	8.32588e-10	0.264041	C4ORF3	0.00260581	0.295071	AAMDC
0.00386812	0.296269	MORF4L1	6.62606e-05	0.287449	DMTF1	0.00857337	0.792648	CD2AP				1.13491e-06	0.992796	AKAP10							1.15525e-08	1.16923	ZNF280C	4.85205e-14	1.29855	GLTSCR2	8.07292e-09	0.507214	ZNHIT1	0.0047694	0.436279	ING3	0.0018166	1.5818	PDE4DIP	9.85126e-10	0.282545	KIAA1683	8.7485e-10	0.40863	LINC01551	0.00285	0.638747	NPHP1
0.00394182	0.370319	CNOT2	6.64687e-05	0.719542	RGS3	0.00863592	0.338878	ZNF773				1.20043e-06	0.704578	ARHGEF3							1.22418e-08	0.395752	DERL1	5.01327e-14	0.252583	XRCC2	8.16321e-09	0.690363	PDCD5	0.00502873	0.411904	TADA3	0.00182802	0.319327	VOPP1	1.00587e-09	0.327627	CHORDC1	9.71782e-10	1.05185	RABGAP1L	0.00297715	0.628894	EGLN1
0.00396615	0.434314	HIST3H2BB	6.82999e-05	0.320446	CUTC	0.00875054	0.624517	PCNX4				1.2012e-06	0.91607	PAAF1							1.26159e-08	0.486645	CAPZA2	5.34255e-14	2.39231	LINC01588	8.80813e-09	0.479278	PLA2R1	0.00507643	0.898943	PTPRS	0.00183419	1.04772	SENP5	1.03826e-09	0.261322	COQ10B	1.02161e-09	0.338501	ILF3	0.00304231	0.582073	TTC39B
0.00398266	0.374572	UBE2J1	7.1159e-05	0.479359	SLC2A11	0.00885819	0.552854	TRPM6				1.21638e-06	1.59353	GNPNAT1							1.28678e-08	0.270885	COPE	5.37339e-14	2.69347	MANBA	1.06517e-08	2.46305	ZNF774	0.00511071	0.623093	PPM1K	0.00184465	0.653305	VMA21	1.04627e-09	0.543506	PLEKHA2	1.07918e-09	0.404068	CMC2	0.00320892	0.860324	RND1
0.00405537	0.694028	SLC12A2	7.44706e-05	0.483844	EIF2AK1	0.0088699	0.392062	PDE7A1				1.35203e-06	0.75512	PYCR2							1.44146e-08	0.774034	ANXA4	5.48726e-14	0.484624	DTX3L	1.18087e-08	2.67579	SNTB2	0.00515012	0.69629	LIMA1	0.00185539	0.435528	2022-03-02	1.07624e-09	0.407969	LASP1	1.12117e-09	0.424434	SNX5	0.00340163	0.648422	CYB5RL
0.00409325	0.347263	PSPH	7.52195e-05	0.376059	SKAP2	0.00895757	0.371529	SYPL1				1.38877e-06	1.25815	NAA16							1.44664e-08	1.18598	RNF207	5.52247e-14	0.830388	CORIN	1.18294e-08	0.438504	MAPKAPK2	0.00521623	0.5409	WHAMMP2	0.00186314	0.279024	DYNLT3	1.10469e-09	0.726969	MAML3	1.17343e-09	0.252445	NDUFB8	0.00341308	0.98134	PGM3
0.00410725	1.0054	COL27A1	7.79782e-05	0.556417	PUS7L	0.00906934	0.489334	ABHD13				1.39603e-06	0.99472	TRMT1							1.44665e-08	0.937689	AKTIP	5.63798e-14	1.25733	DENND2A	1.20772e-08	0.368737	NAA20	0.0052606	0.498911	FAM110A	0.00188089	1.13392	KLRD1	1.18659e-09	1.30774	P2RY10	1.22129e-09	0.363157	RPL41	0.00353303	0.270704	GLT8D1
0.00410965	0.352606	NSRP1	7.81828e-05	0.331728	POLR2J2	0.00937771	0.25357	ZNF891				1.40012e-06	1.1399	ATXN7							1.44734e-08	0.650466	NDUFC2-KCTD14	5.79576e-14	0.918062	TMEM213	1.24799e-08	0.512723	RAB9A	0.00555194	0.386681	CD48	0.00188318	0.681625	ACOX1	1.65519e-09	0.421758	TTI1	1.25714e-09	0.88761	STAT6	0.00355662	0.332452	UFM1
0.00425049	0.267355	CNOT1	7.90575e-05	0.732936	OSER1-AS1	0.00954024	0.317201	ATG101				1.48855e-06	0.394638	ZFP90							1.49418e-08	0.25044	VKORC1	5.79626e-14	1.41535	PEAK1	1.25264e-08	2.94461	RNF157	0.00571104	0.785683	RASSF5	0.00188709	0.79538	OMA1	1.7506e-09	0.309962	PRDX2	1.26298e-09	0.972151	UNC93B1	0.00356888	0.323094	ARPC1A
0.0042957	0.761679	CATSPERB	8.2999e-05	0.567578	NAE1	0.0096128	0.389324	ARL2				1.4943e-06	0.561941	ZNF33A							1.49937e-08	0.338689	SH3BGRL	5.79998e-14	1.89009	KLRD1	1.28764e-08	1.57759	CST3	0.00580208	0.515789	NUB1	0.00191473	0.28946	MPRIP	1.75799e-09	0.907234	F2RL3	1.28416e-09	0.612717	RPS21	0.00364594	0.859098	TTC21A
0.00436929	0.512508	SEC24B	8.66755e-05	0.26399	PARN	0.00965528	0.337187	QRICH1				1.50848e-06	0.878892	NDUFS2							1.52082e-08	0.264292	LAMTOR2	6.03111e-14	1.3398	SIPA1L3	1.29437e-08	0.438272	CCDC88A	0.00645171	0.630179	TRAF5	0.00192065	0.360831	STXBP3	1.86745e-09	0.283448	MGAT4EP	1.28656e-09	0.257015	CHCHD7	0.00372756	1.85717	ARMC9
0.00442162	0.327304	ADAMTS4	8.70419e-05	0.504263	ST8SIA5							1.54304e-06	1.09203	R3HDM2							1.56347e-08	0.31894	MTHFD2	6.36208e-14	0.511767	EMX2	1.3811e-08	0.681809	NFXL1	0.0069	1.31537	COQ10B	0.00196723	0.304612	SNX29	1.91813e-09	0.984299	FKBP7	1.31047e-09	0.418359	NAXE	0.0039258	0.770409	LINC00908
0.00449313	1.36883	ITGA11	8.71959e-05	0.439161	KIZ							1.55952e-06	1.19794	CASP6							1.58191e-08	0.665311	GOT2	6.78749e-14	1.2433	ATP5S	1.69742e-08	0.478124	GPS1	0.00693585	0.600802	RCL1	0.00197482	1.72326	MGP	1.95911e-09	0.269817	SLC22A25	1.32213e-09	0.816269	SLC44A2	0.00404578	0.633464	CHD6
0.00457506	0.576356	TMEM57	8.75662e-05	0.339787	IAH1							1.56052e-06	0.867302	LINC00847							1.62843e-08	1.25983	TDRD3	6.85363e-14	3.27775	GPR65	1.75877e-08	0.554016	DXO	0.00694727	0.413824	IFI30	0.0019754	0.291666	COG6	1.98308e-09	0.538892	EML2	1.35759e-09	0.970573	SLCO3A1	0.00456955	0.506785	ZNF620
0.00458936	0.466091	SLC9A6	8.85851e-05	0.587494	RABL2B							1.57413e-06	0.50525	NDUFV3							1.64448e-08	0.573284	JAK2	6.89676e-14	0.535422	RPL29	1.86325e-08	1.5692	KDM6B	0.00716815	0.5459	GAPT	0.00197645	1.88608	ACSL3	2.05578e-09	1.06511	CCL5	1.39029e-09	0.491754	TXNRD1	0.00488448	0.845111	MAP3K4
0.00459228	0.722311	ZNF816	9.04341e-05	0.422675	SUPT20H							1.60919e-06	0.330264	ICAM2							1.7108e-08	0.430108	NDUFB7	6.99526e-14	2.01971	LPCAT1	2.2239e-08	1.98289	DENND6B	0.00739322	0.263495	LRRC37A3	0.00199435	0.293967	HOXB13	2.47222e-09	0.756166	BTBD10	1.4327e-09	0.783133	ATM	0.00528008	0.773119	SLC30A6
0.00460112	0.609508	SIDT2	9.12529e-05	0.483989	NDUFA8							1.63178e-06	0.261421	HLA-E							1.8136e-08	0.410746	PSMD4	7.07989e-14	1.30832	MYO10	2.25597e-08	0.670774	PIGT	0.00740543	0.25331	COA6	0.00201833	1.86105	MTF1	2.5773e-09	0.890769	PAFAH2	1.46292e-09	1.81857	MNT	0.00530219	0.441614	KDM7A
0.00462086	0.449378	LDLRAP11	9.28751e-05	0.673785	CERK							1.65165e-06	0.419116	ZNF568							1.88328e-08	0.430751	C5AR2	7.30901e-14	0.719026	PRELP	2.26463e-08	0.500035	SYNE2	0.00772155	0.823884	DZIP3	0.00211094	0.386612	MAN1A2	2.57905e-09	0.341577	GLA	1.52502e-09	0.781752	FCGRT	0.00636846	0.88897	SLC2A5
0.00469118	0.314206	LINC00939	9.86275e-05	0.334042	DDX39B							1.68793e-06	0.61031	TMEM106B							1.8985e-08	2.18169	SWAP70	7.55358e-14	1.48565	CAP1	2.31069e-08	0.45853	C16ORF54	0.00777756	0.637732	PRPF18	0.00212883	0.535998	NBPF9	2.79321e-09	0.314197	STARD10	1.54128e-09	0.540217	G3BP2	0.00660769	0.457367	RNF217
0.00469496	0.300085	CNDP1	0.000100417	0.434508	EIF2B5							1.69318e-06	1.10575	ZMYND8							1.96294e-08	0.381474	ATP6V0B	7.62236e-14	0.893467	SMG1P3	2.3515e-08	0.809355	MGST1	0.00852497	0.466889	LYSMD2	0.00213618	0.496771	CENPC	2.79799e-09	0.288719	PLCG2	1.55199e-09	0.383352	RBM12	0.0072679	0.687584	USP6NL
0.00472661	0.679767	SLC7A14	0.000101123	0.308591	BABAM1							1.73849e-06	1.77459	DIS3L							1.96931e-08	0.411069	UBA1	7.66304e-14	3.60204	CBLB	2.57557e-08	0.288977	CYCS	0.00893173	0.781257	CIZ1	0.00218616	0.448639	PFDN2	3.1727e-09	0.280035	IP6K1	1.59532e-09	0.357016	EIF4G2	0.00746057	0.395589	LINC00346
0.00474296	0.3983	CD27	0.000101601	0.286305	IRAK1BP1							1.75227e-06	0.968128	ZNF321P							2.02138e-08	0.382372	SRA1	8.12793e-14	0.909751	QSOX2	2.93028e-08	1.12886	QPCT	0.00951776	0.433459	QTRT2	0.00224496	0.83319	GNA13	3.21995e-09	0.501532	GNL2	1.62111e-09	0.73203	2022-09-09	0.0076168	0.716456	SARM1
0.0047625	0.361525	CLTB	0.000103945	0.366052	NCOA4							1.84904e-06	1.11003	IMPA2							2.02961e-08	0.344647	PSMB5	8.15507e-14	1.7496	SPDYE3	2.98024e-08	1.89469	NINJ1	0.00953292	1.06545	TNFRSF21	0.00225162	0.306246	BOD1L1	3.97048e-09	0.635427	PITPNB	1.68106e-09	1.0913	SYS1	0.00771142	0.386603	OGFOD3
0.00501604	0.405954	CCL22	0.000104293	0.47318	APEH							1.87822e-06	3.12883	ZNF594							2.19572e-08	0.485037	ABHD10	8.30026e-14	2.55167	APAF1	3.16436e-08	0.345047	GNG5	0.00973326	1.06773	RUNX1	0.00226178	0.549826	DNAJC15	4.16045e-09	0.47613	STAM	1.7223e-09	0.306061	RNF5	0.00781258	0.425271	SERAC1
0.0050687	0.334009	GBP6	0.000104298	0.259296	VPS13C							1.89434e-06	1.13545	TMEM168							2.2248e-08	0.641586	ADK	8.57823e-14	0.275437	RNF181	3.17246e-08	0.332432	PGD				0.00228822	0.425417	NPIPB5	4.39076e-09	0.447085	DCP1A	1.73924e-09	0.317177	MRPS7	0.00800872	0.270754	POU2F1
0.00519316	0.610112	DNM1L	0.000104473	0.402425	SLC35A1							1.94065e-06	0.709462	SBDSP1							2.26842e-08	0.61448	TRIM59	1.00714e-13	2.27455	RGS12	3.20021e-08	0.433641	TMED5				0.00238876	1.12963	HS3ST3B1	4.85043e-09	0.894884	IFIT2	1.74629e-09	1.00892	ARID3A	0.00834435	1.26916	ANKRD37
0.00524838	1.54026	FGFR1	0.000104867	0.377279	TPTEP1							2.03907e-06	1.36194	ZNF271P							2.32085e-08	0.721603	IKBIP	1.02112e-13	0.780695	INTU	3.24522e-08	0.552533	SERAC1				0.00240298	0.307452	AKAP17A	5.58228e-09	0.626823	H1F0	1.77385e-09	0.256974	EIF4A2	0.00847441	0.275321	TTC8
0.00540089	0.572347	DDA1	0.000107259	2.25296	RBMS2							2.07189e-06	2.87513	WHAMMP2							2.32776e-08	0.414709	DENND1B	1.04548e-13	2.8396	SRGAP2	3.38598e-08	0.602916	ATOX1				0.00241398	0.264445	HLA-B	6.14355e-09	0.367153	BST2	1.82918e-09	1.15539	MTMR3	0.00924331	0.540128	MAD2L1
0.00540112	0.802376	GCN1	0.000108074	0.261641	TAF12							2.1165e-06	0.529843	SLC16A7							2.3323e-08	0.372128	PCMT1	1.07082e-13	0.264488	NOS1	3.3887e-08	0.37995	NOMO1				0.00241544	0.268583	ELOF1	6.44356e-09	0.726957	BIN3	1.84334e-09	1.2605	PIK3CD
0.00540461	0.542628	ATP1A1	0.00011112	0.34507	SNX6							2.21572e-06	0.695527	PGS1							2.41816e-08	0.420984	MTMR6	1.09458e-13	1.51737	DDX27	3.43698e-08	0.404738	SIVA1				0.00243174	0.384802	CCDC144B	7.03417e-09	0.712385	GTF2IRD2B	1.87276e-09	0.488791	NPHP1
0.00548251	0.347711	POLH	0.000111594	0.580006	ZNF518A							2.30804e-06	0.781636	RAB3GAP1							2.60071e-08	0.779382	TRIM69	1.13416e-13	2.23658	KLF12	3.96285e-08	0.61894	RHBDD1				0.00244768	0.28567	CEP63	7.05005e-09	0.291179	MOB4	1.89272e-09	1.78503	CDC40
0.005502	0.350754	CC2D1B	0.000113536	0.637245	UBXN2B							2.33032e-06	0.766574	BCL2							2.67475e-08	1.00319	PTER	1.13586e-13	2.25439	GPR183	4.0001e-08	0.353078	EBAG9				0.00245	0.671801	WDR61	8.09289e-09	0.526401	MGME1	1.919e-09	0.623702	TPM1
0.00550389	0.421009	ROMO1	0.000115368	0.533231	PRR5							2.45637e-06	0.74705	C15ORF40							2.77361e-08	0.360347	CCDC12	1.21236e-13	0.835939	LINC00426	4.13017e-08	0.484921	IFT80				0.00246538	0.307399	HK2	8.88599e-09	0.290804	MAD2L1BP	1.9626e-09	1.17487	HDAC9
0.00558688	0.877382	DDI2	0.000125537	0.474774	POLR2I							2.56647e-06	0.998477	ST3GAL1							2.82632e-08	0.832297	LAX1	1.25136e-13	1.67178	ADNP	4.14567e-08	0.888223	SSTR2				0.00246735	0.583494	MYO1G	9.42298e-09	0.780777	BCL2L1	1.98507e-09	1.42373	TMOD2
0.00570344	0.587844	IFT57	0.000128408	0.877115	GUSBP1							2.61178e-06	0.865158	MED11							2.85916e-08	0.44297	PARP14	1.27737e-13	1.152	PTCSC3	4.22308e-08	1.5584	ATP5I				0.00248794	0.667462	NSMCE2	1.02702e-08	0.463486	PCTP	2.03733e-09	0.441521	GSPT1
0.00581172	0.253353	EFCAB11	0.000128669	0.300197	RGL2							2.8142e-06	0.479758	NLRC5							2.97207e-08	0.590209	CARD19	1.40783e-13	0.423659	MT-CYB	4.75843e-08	0.287903	NFKBIZ				0.00254562	0.271967	LINC00869	1.18201e-08	1.13783	UNC5B	2.06409e-09	0.40752	COX5A
0.00584521	0.688349	SPATS2L	0.000131986	0.391527	SDHAF3							2.92086e-06	1.03464	ZNF544							2.99063e-08	0.273579	PSMA7	1.44124e-13	1.54107	SLC51A	4.79668e-08	1.5655	GYS1				0.00260351	1.26726	HGSNAT	1.19769e-08	0.302141	SURF4	2.11541e-09	0.479582	USP14
0.00602449	0.420863	RIC8B	0.000135474	0.497407	SF3A3							2.96929e-06	0.556523	LINC00670							3.05411e-08	0.406991	UBE2L6	1.46275e-13	0.846388	ACTG1	4.89767e-08	0.70972	GALNT3				0.0026278	1.44221	DNM2	1.35543e-08	0.837589	RCL1	2.11661e-09	0.806698	SPG11
0.00606786	0.371822	EPM2AIP1	0.000135801	0.455929	TAPBPL							3.13821e-06	0.430761	BRD8							3.05621e-08	0.414697	PGD	1.46503e-13	0.684876	VGLL3	5.01621e-08	0.572993	CCL22				0.00264084	0.264562	RPLP2	1.36867e-08	0.349058	APLF	2.12138e-09	0.565927	USP12
0.00607762	0.412348	NRF1	0.000136752	0.742436	JAKMIP2							3.14041e-06	0.327732	POLR3D							3.23185e-08	0.41511	LDHA	1.48604e-13	2.95427	PHLPP2	5.26915e-08	0.516931	ENO2				0.00265191	1.60164	ZBTB43	1.52717e-08	0.513181	BORCS5	2.22739e-09	1.15168	CEBPA
0.00609579	0.443135	NEDD4	0.000138041	0.313787	EIF3L							3.16572e-06	1.29299	CEP41							3.27692e-08	0.31247	CSRP1	1.51031e-13	1.90896	UBE2N	5.47841e-08	0.950288	IKBIP				0.00265443	0.446591	SLC38A2	1.5352e-08	0.63925	RASA2	2.24231e-09	2.16164	TBL1X
0.00612959	0.408177	WHAMMP21	0.000138461	0.348015	CYB561D2							3.33673e-06	1.00657	PMS2P1							3.37436e-08	0.629128	RHBDD1	1.53702e-13	1.8455	CNPY3	5.7146e-08	0.708043	HAGH				0.00266874	1.03852	SESN2	1.5504e-08	0.703042	TBC1D30	2.31585e-09	0.848986	CLIP4
0.00618164	0.497545	RMND5B	0.000141717	0.363227	USP49							3.38023e-06	1.72685	CNKSR2							3.5419e-08	2.61062	PTGIR	1.59359e-13	0.41141	ZSWIM8	6.49564e-08	0.630797	KCNJ14				0.00267865	0.889577	LIMK2	1.58697e-08	0.838606	BMF	2.47454e-09	0.327001	IRF2BP2
0.00627923	0.721989	IFNG	0.000146188	0.357685	UBQLN2							3.38482e-06	0.342345	RCSD1							3.69655e-08	0.317789	B4GALT1	1.65154e-13	1.97686	UTP6	6.64389e-08	0.777989	PPOX				0.00271756	0.907045	ARFGAP3	1.65943e-08	1.00306	PSMC2	2.48245e-09	0.408283	BCL10
0.00630722	1.13059	MED13	0.000148106	0.417202	PCYOX1							3.38767e-06	0.826902	FSIP2							3.77146e-08	0.571045	AKAP2	1.78977e-13	1.43602	MSH5	6.75075e-08	0.523668	RBM33				0.00276	0.40524	SEC11C	2.1023e-08	0.56161	C21ORF59	2.55135e-09	0.954699	NOD2
0.00635417	0.356524	PLEKHD1	0.000151257	0.265681	PHB2							3.42087e-06	0.397629	CARS2							3.84283e-08	0.477769	UFD1L	1.85555e-13	0.900751	KCNJ5	7.3993e-08	0.973913	CLCC1				0.00276868	1.50871	CDH13	2.30941e-08	0.615759	MBNL2	2.62675e-09	0.694538	MTRNR2L6
0.00639251	0.803963	MECP2	0.000151398	0.314403	DENND1C							3.46445e-06	1.22784	LINC00667							3.91675e-08	0.615535	SETD1B	1.88838e-13	1.60257	AGO3	7.73376e-08	0.291516	SERPINA1				0.00277669	0.858737	PTPN1	2.55932e-08	0.306887	NSMCE3	2.63273e-09	0.712205	FCGR2C
0.00654298	0.258816	KIF1BP	0.000153876	0.359027	RSU1							3.4671e-06	0.890227	NEK9							4.02937e-08	0.513455	GUSB	1.94496e-13	1.84313	RNPC3	8.57148e-08	0.264024	MRPS23				0.00284979	0.554026	MYO18A	2.72594e-08	0.422237	LMAN2	2.73053e-09	0.520246	PPRC1
0.00659839	0.364458	GNL1	0.000156214	0.344124	ATG16L2							3.46863e-06	0.723428	ABHD14B							4.04505e-08	0.39682	DNMT3A	1.94509e-13	2.05928	PAN3	8.81386e-08	0.460857	CDIP1				0.00285443	1.70523	FN1	2.81858e-08	0.890711	PCYOX1	2.73893e-09	0.507412	GRPEL1
0.00675998	0.386843	SLC23A2	0.000157996	0.333222	NT5C							3.52264e-06	1.96846	ZNF814							4.187e-08	0.304143	SUMO1	2.00321e-13	2.1502	TTF1	8.84821e-08	0.588254	COASY				0.00285926	0.424903	SPIN1	2.84515e-08	0.986726	RSAD2	2.80603e-09	0.519537	OAZ1
0.00691459	0.948502	UGGT2	0.00015996	0.563017	NDUFV3							3.74387e-06	0.827836	SMIM7							4.20721e-08	0.27455	MGME1	2.01847e-13	1.13751	GABRB3	8.98815e-08	0.373891	NORAD				0.00288182	0.335951	EGR3	3.15108e-08	0.471466	MECP2	2.82112e-09	1.30366	NCKAP1L
0.00692637	0.84857	DCUN1D3	0.000162309	0.835126	LINC00957							3.84864e-06	0.635364	MTR							4.2512e-08	0.45985	TOMM34	2.03275e-13	1.70171	ZNF559	9.52096e-08	0.556246	GNS				0.00290207	1.09049	RNF144B	3.16895e-08	0.258865	SPCS1	2.83411e-09	0.412769	TMEM208
0.00707708	0.582288	2022-03-06	0.000162484	0.314241	EIF3G							3.92269e-06	0.990872	EZH1							4.7524e-08	0.338506	MAPKAPK3	2.11559e-13	1.81602	CASP2	9.79743e-08	3.28377	GOLGA3				0.00296032	1.02658	ARHGEF7	3.42127e-08	0.679879	SNAPC1	2.96352e-09	1.42383	RIN3
0.00723186	0.461333	ICAM1	0.000165854	0.574505	SLC46A1							4.04901e-06	0.93202	RBM19							4.91577e-08	0.6413	ASCC1	2.17749e-13	0.92964	SLC41A2	9.95439e-08	0.684827	MRPL2				0.00296313	1.38605	CCNT1	3.62552e-08	0.465285	SS18	2.96975e-09	0.663772	NAGK
0.00737347	0.390089	BTAF1	0.000175258	0.321655	XAF1							4.12873e-06	1.63135	SHH							5.05368e-08	0.277291	DBI	2.18855e-13	1.59902	OTX2-AS1	1.02199e-07	0.661202	ITGB7				0.00298062	0.296966	ALOX5AP	3.64578e-08	0.462918	CFAP36	3.00236e-09	0.251737	KMT2E
0.00749278	0.338118	MARK4	0.000176956	0.365905	CERS2							4.28328e-06	1.77867	PEX1							5.10037e-08	0.290022	NDUFAB1	2.27753e-13	0.839953	PAWR	1.08664e-07	0.66458	TPM4				0.00300794	1.17988	LDLRAD4	3.74952e-08	0.498251	NME7	3.35982e-09	1.44386	FAM13A
0.00750422	1.33591	CDH17	0.000179825	0.45243	SGSM3							4.28885e-06	1.95238	SLC4A5							5.49193e-08	0.304777	TRAK2	2.32747e-13	1.57532	SH3BGRL	1.10614e-07	2.79133	IER3				0.00300886	0.346864	HUNK	3.89585e-08	0.727741	LXN	3.36464e-09	1.17778	TVP23B
0.00758532	0.667809	TM9SF1	0.000180062	0.336779	GTF3C3							4.46483e-06	0.512691	UG0898H09							5.50604e-08	0.324689	ATP5J2	2.42451e-13	0.452061	MAB21L3	1.12267e-07	0.522716	DENND1B				0.00301872	0.397897	CBFB	3.97764e-08	0.31071	FTH1	3.47781e-09	0.397957	NOP56
0.00758906	0.669532	FAM105A	0.000180584	0.799278	HIVEP3							4.4698e-06	0.388929	TMA7							5.61426e-08	0.465315	RNPEPL1	2.49587e-13	1.16876	PPP2R3A	1.14647e-07	1.25865	UQCC2				0.00303243	0.261585	BMPR1B	4.20078e-08	0.571121	METTL21A	3.50425e-09	0.768517	SNRPG
0.0077445	0.325049	MYEF2	0.000181825	0.562289	ANXA2R							4.47032e-06	0.912523	ZNF626							5.61661e-08	0.330417	RAB2A	2.5249e-13	0.680317	NUP155	1.14924e-07	2.2556	HELLS				0.0030523	0.279731	KDM3B	4.20277e-08	1.42559	ST8SIA1	3.52357e-09	0.640411	BIRC2
0.0078624	0.30539	KCNIP4-IT1	0.000183828	0.409218	STAT6							4.5183e-06	0.651665	GTF2I							5.61934e-08	0.508057	UGCG	2.56472e-13	0.991562	PABPC1	1.22554e-07	2.14257	CHST12				0.00305439	0.683288	ACACA	4.53205e-08	0.290948	SLC39A4	3.64953e-09	0.284055	EHD4
0.00790195	0.382201	RRN3P1	0.000185292	1.03298	PTPN12							4.5753e-06	0.282731	SAMHD1							5.63153e-08	0.415294	ADAM10	2.56755e-13	0.724994	MOGAT3	1.2257e-07	0.380821	ISG20				0.00311609	0.261228	SRRT	4.62867e-08	0.268149	USP9X	3.6721e-09	1.34686	CASP8
0.00798925	0.435013	PRKAR2A	0.000190308	0.43511	CHAF1B							4.65727e-06	0.836599	JMJD7-PLA2G4B							5.7886e-08	0.424453	PMF1	2.62443e-13	1.78409	FAM228B	1.22577e-07	0.936594	SIK2				0.00311798	0.264568	ZCCHC7	4.75408e-08	0.265733	TIPRL	3.74553e-09	0.418604	FKBP3
0.00806795	0.667683	ZNF677	0.00019353	0.316852	ZNF33A							4.7191e-06	0.989255	MITD1							5.85462e-08	0.284142	PPP1R7	2.6812e-13	0.959159	ZNF585B	1.39971e-07	0.751671	IL1B				0.00314389	0.554707	EGFR	4.78858e-08	0.559252	TTC38	3.8626e-09	0.602395	LPCAT2
0.00815028	0.251636	METTL12	0.000195457	0.33595	NCKAP1L							4.73549e-06	0.580822	LILRB4							5.90554e-08	0.328557	MICAL1	2.7201e-13	1.11535	RAB8B	1.43852e-07	1.26722	SCO2				0.00315113	1.54037	EPB41	4.81695e-08	0.306294	NRBP1	3.91223e-09	0.492092	KREMEN1
0.00815779	0.672889	LGMN	0.000200336	0.301302	GIT2							4.75977e-06	0.96729	DGKZ							6.11591e-08	0.33831	PGM2	2.73705e-13	1.06626	PSD4	1.52858e-07	1.15753	PAPD7				0.00317884	0.765441	ITGA1	5.23859e-08	0.369987	RBM3	3.91635e-09	0.734333	COX16
0.00815959	0.815782	MYH7B	0.000201044	0.370183	MTG1							4.77669e-06	1.03223	METTL16							6.11661e-08	0.577939	TUBA1C	2.90718e-13	3.18209	TMED8	1.67196e-07	0.64836	TMEM231				0.00320199	0.881126	KLHL18	5.86381e-08	0.561554	MGAT2	3.95854e-09	0.436783	CHD4
0.0081875	0.333426	GLB1L3	0.000201464	0.410346	RUNX2							4.77975e-06	1.18772	PSMG4							6.13627e-08	0.708364	PFDN2	2.95586e-13	0.496032	MYCBPAP	2.29042e-07	0.320159	FAM127A				0.00322091	0.434323	LINC00426	5.86563e-08	0.385729	HSPA13	3.96139e-09	0.634651	RRM2B
0.0082026	0.598689	NBPF20	0.000208747	0.368373	UNC13D							4.92808e-06	0.284177	TPRXL							6.19087e-08	0.388192	UBL5	3.31388e-13	0.938709	DET1	2.46682e-07	1.0439	BLVRB				0.0032694	1.2079	GID8	5.99594e-08	0.633908	FECH	4.15359e-09	0.346134	WBP2
0.00838043	0.921334	SLC26A2	0.000209477	2.71571	NHSL2							4.92908e-06	0.692098	HELQ							6.23053e-08	0.299693	NSFL1C	3.62849e-13	0.878741	SEC14L5	2.7418e-07	1.32131	RAB3D				0.00328114	0.437892	XRN1	6.01461e-08	0.46341	SF3B4	4.20849e-09	1.68637	FCAR
0.00838259	0.394041	NCF1	0.000213909	0.327409	WDR46							5.0362e-06	1.46963	DIP2B							6.37635e-08	0.252122	TMEM258	3.66425e-13	0.805688	LINC00511	2.75539e-07	1.67934	CSNK1E				0.00328255	1.39082	PDE11A	6.48361e-08	0.467065	SPN	4.28189e-09	0.284399	EYA1
0.00851337	0.370985	MFSD11	0.000220287	1.07297	SMAGP							5.17418e-06	0.693153	MFGE8							6.6401e-08	0.333542	CHMP2B	3.70284e-13	0.398206	RAB3B	2.89155e-07	1.07576	ABCC9				0.0033476	0.515552	TAF7	6.76099e-08	0.799281	GINS4	4.34446e-09	0.755429	GGA2
0.00856568	0.5366	ZNF569	0.000232647	0.297592	DTD1							5.18168e-06	1.06904	NSUN5							6.68615e-08	0.328012	ARPC5L	3.72576e-13	0.35824	ZNF766	2.90186e-07	0.381151	MRPL12				0.00337575	0.605443	RILPL2	7.20861e-08	0.999738	LYSMD3	4.52849e-09	0.957514	GLRX
0.00880485	0.421228	NPLOC4	0.000236678	0.364403	ZBTB37							5.35518e-06	0.461327	FBXO15							6.90106e-08	0.56813	CDKN1B	3.72696e-13	1.42886	DUSP10	3.06049e-07	0.519288	ARSD				0.0034048	0.834669	CAPN15	7.31116e-08	0.259458	MCU	4.61089e-09	0.677962	HBP1
0.00883489	0.40373	TFIP11	0.000238463	0.358412	PGGT1B							5.58097e-06	0.445156	HEATR3							7.10886e-08	0.421929	ZYX	3.87219e-13	1.15636	TRMT10B	3.0609e-07	0.958422	SPRYD3				0.00345151	1.43204	FN3K	8.06953e-08	0.894032	MAP7D3	4.6325e-09	1.14456	ZCRB1
0.00886702	0.393989	DSEL	0.000248036	0.52449	LCLAT1							5.58584e-06	0.571212	SNRPN							7.53807e-08	0.467395	SLC39A1	4.08255e-13	1.25723	RUFY2	3.13734e-07	1.23206	GCLC				0.00345222	1.85401	PROCR	8.12922e-08	0.298064	ATG14	4.64026e-09	0.346896	TOMM5
0.00887981	0.402009	MED19	0.000250143	0.391652	FAM47E							5.64393e-06	0.587495	HELB							7.73802e-08	0.300574	ARF4	4.13022e-13	2.14856	IKBKB	3.2961e-07	0.652454	MRPL34				0.00349334	0.544524	GSN	8.18142e-08	0.447389	NPRL2	4.8577e-09	0.564088	TRIM25
0.00888446	0.275749	TSPYL4	0.00025714	0.709174	TEFM							5.92895e-06	0.660257	SGTB							7.94824e-08	0.299049	NUMB	4.21621e-13	3.05666	CNKSR3	3.49361e-07	0.280008	U2AF1L4				0.0035538	0.499576	SND1	8.57062e-08	0.550707	AK2	5.14848e-09	0.982583	TWSG1
0.00907351	0.773111	ZNF134	0.000261381	0.47497	GMPR2							5.93791e-06	0.598512	ERV3-1							8.59396e-08	0.25001	TAX1BP1	4.51852e-13	1.80256	GCNT2	3.58758e-07	0.262121	LMF2				0.00358371	0.290697	TPP2	8.72571e-08	0.739573	EIF1AY	5.26928e-09	0.296551	UBE2D3
0.00919924	0.383949	PRDM2	0.000265418	0.272874	PARP9							6.07151e-06	0.491058	NLRP2							8.86369e-08	1.06203	MAPK13	4.55755e-13	3.11203	RGL2	3.9545e-07	0.931041	SPTSSA				0.0036215	0.378777	MOGAT3	8.84189e-08	0.35621	SNU13	5.43688e-09	1.24241	CPPED1
0.0092108	1.89877	LRRC2	0.00026638	0.274935	TPM3P9							6.25493e-06	1.2559	C14ORF37							9.07081e-08	0.338152	APOBEC3F	4.66299e-13	0.494976	ZNF33B	4.19332e-07	0.604091	DDX18				0.00365995	0.318728	TRDMT1	9.0563e-08	0.349825	ATP5F1	5.48263e-09	0.959854	ICE2
0.0092355	0.359362	PLEKHM1	0.000289091	0.722507	CEP126							6.32276e-06	0.645327	SDAD1							9.37627e-08	0.431785	SYT11	5.03521e-13	0.79781	KCNV1	4.34926e-07	0.903983	GSS				0.00369877	0.550081	MORC3	9.48541e-08	1.39004	ALDH5A1	5.49964e-09	0.313837	UQCRC2
0.0093659	0.301656	ZNF674-AS1	0.000292915	0.404192	CMAS							6.33327e-06	1.3916	ZNF674							1.019e-07	1.04245	STYXL1	5.60396e-13	0.371546	ZNF506	4.38176e-07	0.265269	TMPO				0.00371357	0.332606	MDFIC	1.06938e-07	0.638577	HIBCH	5.56422e-09	0.375742	MORF4L1
0.00948483	0.689458	TRAF3	0.000302824	0.35521	POLR2J							6.34267e-06	1.25208	CEP250							1.0378e-07	0.303378	H2AFJ	5.61959e-13	3.10823	ZNF665	4.63255e-07	0.56036	TOLLIP				0.00371472	0.571434	RPGRIP1L	1.11101e-07	0.782331	GSTM1	5.57419e-09	0.523988	RASA1
0.00956673	0.714819	PRR11	0.000304367	0.399896	CYB561A3							6.35657e-06	0.643947	LGALS3BP							1.08427e-07	0.643566	TGIF2	5.94938e-13	0.75384	LINC00346	4.70039e-07	0.327322	PXMP4				0.00374988	0.450722	SAMD4A	1.18799e-07	0.635991	HNRNPH2	5.73719e-09	0.420097	PLIN3
0.00971137	0.371035	VENTX	0.00030457	0.470598	LMF2							6.39832e-06	0.57412	RPA2							1.08632e-07	0.579766	PMM1	5.95457e-13	0.521918	LIMK1	4.92447e-07	1.30857	PPP1R13L				0.00377081	0.25541	RBM25	1.30356e-07	0.920045	OCIAD2	5.74789e-09	0.69115	TUFM
0.0097439	0.31782	UBQLN1	0.000308349	0.505162	IFRD2							6.42832e-06	1.45361	GANC							1.15417e-07	0.651195	POLD4	6.06613e-13	0.793134	HNRNPA2B1	5.40609e-07	1.21537	STYXL1				0.00377262	0.584281	MAP3K4	1.3454e-07	0.791548	TMF1	5.79049e-09	1.64172	PTPN4
0.00974701	0.361416	PPFIBP1	0.000312125	0.538366	PDLIM2							6.53949e-06	0.754509	KIF2A							1.21965e-07	1.9423	PARVB	6.17641e-13	3.01471	SCRG1	5.68712e-07	1.44816	YIF1B				0.00381394	2.02281	GAMT	1.37476e-07	0.503005	ACER3	5.81357e-09	0.589776	SRPRA
			0.000315572	0.575642	PTRH1							6.75715e-06	1.43644	CARF							1.30899e-07	0.388745	SLX1A	6.21593e-13	1.14516	WSB1	5.88556e-07	0.510197	ACBD7				0.00383296	0.491731	MYEF2	1.45654e-07	0.804376	PRPSAP2	5.93804e-09	1.26283	DGKZ
			0.000319841	0.409256	PDCD6							6.82506e-06	1.14158	POLM							1.33038e-07	0.4837	IL10RB	6.68963e-13	0.634794	OSMR	5.95459e-07	0.305207	KANSL3				0.00388213	0.934048	ADAMTSL4	1.45905e-07	0.384057	POP5	5.93991e-09	0.886573	IRF2
			0.000324323	0.266447	CD247							6.85334e-06	1.27659	CSTF3							1.34772e-07	0.431894	MPDU1	6.9456e-13	1.27797	TAF15	5.96489e-07	0.286445	KIF21B				0.00389518	0.964487	BAZ1A	1.52564e-07	0.344533	PRKRA	5.99809e-09	1.26177	FAM156B
			0.000325318	0.713995	TMEM254							6.96577e-06	0.495978	RDH16							1.40552e-07	0.821386	PCCA	6.94619e-13	1.87023	GRAMD1C	6.20943e-07	2.74961	PINLYP				0.00392782	1.42194	PRIM2	1.66792e-07	0.527582	APOBEC3C	6.11679e-09	0.801724	C3ORF58
			0.000333105	0.325532	GBP4							6.96967e-06	1.36757	CAPN10							1.42635e-07	0.679432	P4HA1	7.02041e-13	1.84069	DIP2B	6.49548e-07	0.459392	SLC25A39				0.00392798	1.10001	DTD1	1.66816e-07	0.278524	CLIC4	6.3972e-09	0.556762	UBA52
			0.000339468	0.409951	VTI1B							6.97568e-06	1.15564	GART							1.42816e-07	0.337351	TALDO1	7.22844e-13	1.04267	LY9	6.61235e-07	1.01072	HSP90AA1				0.0040074	0.40817	IPO7	1.69472e-07	0.503317	DYNLT3	6.52119e-09	0.470928	VDAC2
			0.000342947	0.592821	WDR7							7.0812e-06	0.94696	PDCD2							1.55325e-07	0.298715	ACP6	7.2457e-13	1.78469	CELF4	6.63273e-07	1.08544	SLC33A1				0.00420386	1.11382	LYPD5	1.78343e-07	0.266274	MRPL50	6.67672e-09	0.557054	MAP4K1
			0.000354076	0.468019	MRPS31							7.48353e-06	1.90721	ZNF519							1.5549e-07	0.651003	NME3	7.29629e-13	1.60989	CCDC40	6.94777e-07	0.495222	FOXRED1				0.00420416	0.516627	AIMP2	1.84331e-07	0.630638	TNFAIP8L1	7.07699e-09	0.557651	HIPK3
			0.000355139	0.276712	FLII							7.50473e-06	1.06179	DENND6A							1.67806e-07	0.475234	AK3	7.35091e-13	0.746782	ZNF788	7.29947e-07	0.66112	OPTN				0.00436236	0.708748	PAG1	1.86386e-07	0.336372	YARS	7.18076e-09	0.762822	ZYX
			0.000359686	0.424514	BNIP2							7.58262e-06	0.516895	MAN1C1							1.94164e-07	0.261978	FAM89B	7.49402e-13	1.24649	RDH16	7.45634e-07	0.290231	MED8				0.00442309	1.2768	SYAP1	2.22112e-07	0.410691	MOAP1	7.34625e-09	0.290957	TLE3
			0.000359941	0.782745	COG4							7.67314e-06	0.553354	MAP1LC3B2							1.98825e-07	0.630436	SMC6	7.56216e-13	1.14054	RPS6KA5	7.57519e-07	0.811071	LINC01205				0.00443337	0.367629	OTUD5	2.30254e-07	0.738353	TMEM245	8.02734e-09	0.990342	CKAP5
			0.000369183	0.325758	RAD50							7.7336e-06	0.817537	NR2C1							2.06983e-07	0.37674	ARHGEF6	7.67626e-13	0.937408	STRIP2	7.83616e-07	0.694453	PLA2G4C				0.00447877	1.19556	LMO7	2.42789e-07	0.258335	ARIH2	8.0657e-09	0.306365	NDUFB4
			0.000372747	0.486956	UCKL1							7.94457e-06	0.745565	ATAD5							2.15948e-07	0.310719	ABI1	7.68932e-13	0.855731	FAM110D	8.18948e-07	2.08639	SDC4				0.00449335	1.01766	CFAP74	2.72033e-07	0.286811	RNF5	8.19163e-09	0.903339	CHSY1
			0.000386094	0.553056	ARL5A							7.96924e-06	0.348926	SPTLC3							2.22157e-07	0.26575	TOB2	7.8138e-13	0.892798	STIM1	8.57529e-07	1.34419	PHGDH				0.00454719	0.774117	DGKE	2.93398e-07	0.25977	AGK	8.45982e-09	0.382415	PPM1N
			0.000388421	0.297943	SAMD9							8.0061e-06	0.304463	IREB2							2.24915e-07	0.276163	MAT2B	7.85065e-13	1.38406	PPP3CA	8.7225e-07	1.01328	ASTN2				0.00455721	0.265208	CDCP1	2.93558e-07	1.8344	ZNF552	8.50504e-09	0.661222	TPD52
			0.000390249	0.597693	ZNF75A							8.06417e-06	1.14994	TRIM56							2.26954e-07	0.480241	MYD88	7.86341e-13	1.28431	RCAN3	8.84081e-07	0.906429	TOR3A				0.00455774	1.29285	ZNF493	3.08705e-07	0.474788	CCT7	8.75474e-09	0.523754	LSM3
			0.000394873	0.749144	SPEF2							8.40187e-06	0.662086	KAT6A							2.2976e-07	0.36941	PSMC5	8.08566e-13	3.32485	TNFRSF1B	9.26695e-07	0.516863	C2ORF81				0.00456903	0.734974	TRIM25	3.20552e-07	0.260429	ANAPC16	8.9722e-09	0.349526	TPCN1
			0.00040794	0.496308	MED8							8.46927e-06	0.261134	MDN1							2.42985e-07	0.415939	SLA2	8.34368e-13	2.02616	PCNX2	1.02371e-06	0.74899	AAMP				0.00457733	0.462592	PTPN22	3.21306e-07	0.267959	HNRNPA0	9.08833e-09	1.52662	ABTB1
			0.000409415	0.33215	PYCR2							8.52528e-06	1.4171	RPS10-NUDT3							2.45376e-07	0.387921	HUWE1	8.42287e-13	1.16474	PDDC1	1.05332e-06	0.280343	TIMM17A				0.00464623	0.993769	EZH2	3.47047e-07	0.338307	WDFY1	9.26129e-09	0.722576	BZW2
			0.000411519	0.575614	UQCC3							8.62891e-06	2.20615	TMEM220							2.65168e-07	0.515865	DNAJB11	9.28925e-13	0.506514	LINC01531	1.06692e-06	0.433235	NME4				0.00464801	0.72311	MECP2	3.50009e-07	0.519303	PNRC2	9.3686e-09	0.263771	CRTAM
			0.000418996	0.326688	URM1							8.66477e-06	0.39933	SMAD2							2.82231e-07	0.295066	PSMA1	9.76745e-13	0.271118	HMGN3	1.08807e-06	0.584847	BMPR1B				0.00469649	2.35404	DUSP4	3.50389e-07	0.297611	KPNA6	9.43382e-09	0.306331	SERINC5
			0.000425464	0.505966	MFSD8							8.67022e-06	1.08998	SIRT5							2.82727e-07	0.422878	RANBP1	9.93039e-13	3.11725	TRAK1	1.16018e-06	0.896718	FBXO32				0.00475733	0.333036	CYB5R4	3.51749e-07	0.629282	PPM1L	9.44022e-09	0.987748	GZMA
			0.000428572	0.593531	SP4							9.67779e-06	1.17409	DNAJA3							2.98037e-07	0.274632	PRDX2	9.98914e-13	1.37062	ELMO1	1.24477e-06	0.498369	MRPL3				0.00481155	0.466341	GPR85	3.55057e-07	0.468654	TANK	9.53301e-09	1.81226	HIST1H2AC
			0.000433093	0.272995	TWF2							9.69675e-06	0.719581	DDX18							3.01758e-07	0.491398	ETFB	1.02493e-12	1.17625	KIAA1456	1.25966e-06	1.36614	ACSS2				0.00481749	0.297042	PCBP2	3.72467e-07	0.317676	PRPF38A	9.56843e-09	0.48904	SMG1P1
			0.000442088	0.261349	RNF181							9.74087e-06	1.07676	GOLGA2P5							3.02656e-07	0.322555	LINC01239	1.03398e-12	2.51452	SIPA1	1.27514e-06	0.805351	ZNF674				0.00486151	0.988935	RNF180	3.83077e-07	0.339737	ARL6IP5	1.01332e-08	0.485167	ZNF121
			0.000442983	0.433241	UBE2V2							9.79146e-06	1.14623	USP24							3.05438e-07	0.30805	RTN3	1.03504e-12	1.17433	TERF2	1.29648e-06	1.23775	FAM114A2				0.00508745	0.502301	FKBP2	3.93998e-07	1.96628	IL2RB	1.03417e-08	0.438033	STK17A
			0.000455362	0.552588	AP3S2							9.95595e-06	0.298755	CCDC169							3.10325e-07	0.691678	ACBD3	1.0453e-12	1.08907	TRA2A	1.30019e-06	2.7035	LRRC2				0.00510224	0.478863	HDAC5	4.01056e-07	1.8177	NCKAP1	1.05305e-08	0.547686	C19ORF24
			0.000462015	0.286388	IGBP1							1.0047e-05	1.0172	SDHAF3							3.17397e-07	0.463591	EXOSC1	1.04596e-12	1.01066	RAD51C	1.30572e-06	0.630704	RALY				0.00510987	0.445936	ANKRD17	4.12355e-07	0.334814	HK2	1.05756e-08	0.499613	LRRC75A
			0.000486691	0.307738	CNN2							1.01736e-05	0.37141	FCRL5							3.20079e-07	0.75985	FAM126A	1.05194e-12	2.00405	CORO2A	1.33873e-06	0.8458	ZNF345				0.00519193	0.307273	ADD1	4.28227e-07	1.01733	TTC28	1.09497e-08	1.60362	CDK17
			0.000502322	0.357561	SUMF2							1.04194e-05	0.90747	PIAS2							3.25842e-07	0.50832	TMEM208	1.06684e-12	0.627257	C12ORF76	1.47898e-06	0.544469	ERCC4				0.00523844	0.307829	VPS13B	4.51255e-07	0.441812	FDX1	1.1371e-08	1.56443	LTB4R
			0.000507722	0.461513	SHC1							1.05408e-05	0.53333	PKN1							3.28253e-07	0.329657	PSMB9	1.07276e-12	1.74376	ZC3H8	1.50953e-06	0.405636	EYA1				0.00529191	1.42459	SLC35B2	4.55004e-07	0.523133	NOL4L	1.15909e-08	0.251422	LSM4
			0.00051227	0.340406	WASH3P							1.05872e-05	0.942402	ZNF75A							3.35704e-07	0.69055	NAGK	1.09232e-12	0.850412	EPC1	1.54482e-06	0.817295	ZNF623				0.00535194	0.612043	CCDC18	4.62753e-07	0.40891	KLHL18	1.16941e-08	0.626209	RTCB
			0.000513966	0.265479	DPY30							1.11583e-05	0.380839	CTDSP2							3.90866e-07	1.45869	MPST	1.16745e-12	1.49082	HNRNPK	1.60904e-06	0.512396	PAGR1				0.00537351	0.57383	RIN2	4.67879e-07	0.629048	SPRYD3	1.28059e-08	0.859997	SIDT2
			0.000517295	0.333683	PDCD10							1.13139e-05	0.427388	XPNPEP3							4.00339e-07	0.330961	IER5	1.17935e-12	1.14257	SAMD3	1.6131e-06	0.577923	TUBG1				0.00542786	0.885371	NMRAL1	4.96112e-07	1.40778	FAIM	1.28646e-08	0.966943	TTC14
			0.000518845	1.11718	HMGCL							1.16322e-05	0.674003	HKR1							4.75978e-07	0.658548	PTRHD1	1.18985e-12	1.39077	RBMS3	1.65215e-06	0.977962	TMEM256				0.00543095	0.494358	HSPA7	5.50278e-07	0.343024	RFC2	1.33064e-08	0.616719	RNF103
			0.000519436	0.575515	GTF3C1							1.16856e-05	0.524245	CORIN							5.09274e-07	0.733475	PRKAB1	1.21852e-12	1.39777	L2HGDH	1.65394e-06	0.412515	RAMP2-AS1				0.0054678	0.312465	FERMT3	5.50489e-07	0.355388	RPS27L	1.34489e-08	1.35543	KIAA1109
			0.000524349	0.765078	TMEM229B							1.1794e-05	1.69317	TPM1							5.12467e-07	0.297689	NECAP2	1.25761e-12	1.4764	ZNF224	1.69719e-06	0.445822	PGAM1				0.00551272	0.29825	PPP4C	5.67791e-07	1.43975	NDUFA4	1.41312e-08	0.977794	FAM193B
			0.000532207	0.304889	TIMP1							1.18695e-05	0.692911	TOP3A							5.38148e-07	0.389911	UBE2N	1.25859e-12	0.749361	ZNF529	1.72734e-06	0.813918	SFXN5				0.0055342	0.495536	ATXN7	5.68903e-07	0.422455	ZBTB4	1.55698e-08	0.653028	MIDN
			0.000542817	0.385537	SDHAP1							1.21763e-05	0.262751	LNPEP							5.47414e-07	0.273748	PERP	1.31235e-12	0.951985	SPTLC2	1.73618e-06	0.726355	BRCA1				0.0056027	0.61668	SERAC1	5.77942e-07	0.953672	ZNF544	1.56782e-08	1.01709	FLOT2
			0.000557193	0.433116	HAUS1							1.23843e-05	0.723071	DNASE1							5.52974e-07	0.507059	NDUFA1	1.31664e-12	0.728555	MORC4	1.77313e-06	0.889105	E2F5				0.00568893	0.675863	SMG1P5	5.82873e-07	0.344814	G3BP1	1.57114e-08	0.424433	SAE1
			0.000570195	0.291605	HMGN4							1.2453e-05	0.56617	AP1M1							5.63888e-07	0.268657	MRPS7	1.35377e-12	0.777464	KIAA1161	1.78213e-06	0.975749	HYKK				0.00571532	0.34007	METTL23	6.17982e-07	0.275978	KATNA1	1.58849e-08	0.635977	METTL7A
			0.000590924	0.502511	FAM20B							1.25201e-05	0.953883	ZNF84							6.03125e-07	0.276264	DPY30	1.37504e-12	1.93907	ZNF83	2.11038e-06	1.51767	YKT6				0.00577422	0.652915	CYB5RL	6.32193e-07	0.507736	POLE3	1.59707e-08	1.77667	SPTLC2
			0.000590957	0.469544	MRPS26							1.26263e-05	0.476712	ZBTB20							6.73018e-07	0.281825	IRF9	1.37753e-12	1.61875	BPTF	2.13743e-06	1.56135	MRPS33				0.00583076	0.321415	SMG1P1	6.68509e-07	0.722209	TSNAX	1.59865e-08	1.16771	XRN2
			0.000592811	0.472408	ZCCHC17							1.27998e-05	0.410604	TMEM161B							6.78165e-07	0.380002	TIPRL	1.37947e-12	0.931723	TRPM7	2.18814e-06	0.56244	ASNS				0.0059571	0.377451	IL10RB	7.06283e-07	0.278285	STK26	1.71549e-08	0.461384	MZT2A
			0.000593892	0.377751	TCEANC2							1.28267e-05	1.80698	TBC1D32							6.78802e-07	0.289227	C14ORF159	1.39253e-12	0.948039	EPHB4	2.27559e-06	0.398954	KIAA1841				0.0059862	0.588865	SDCCAG8	7.31039e-07	0.428789	ASMTL	1.71869e-08	0.335828	SND1
			0.000602826	0.434849	UQCC1							1.29669e-05	0.701658	SCAPER							6.79866e-07	0.270135	GPR137B	1.40436e-12	2.04647	EFCAB12	2.29036e-06	0.815055	SLC27A5				0.0060118	0.620746	QSOX1	7.51765e-07	0.326168	RPAIN	1.744e-08	1.05399	GPR141
			0.000608343	0.392316	CRYZ							1.30807e-05	0.763136	FAM159A							7.0805e-07	0.250246	TOP1	1.47176e-12	0.969355	MOB1A	2.31272e-06	0.558736	ACAD11				0.00604905	0.728458	ERAP1	8.05469e-07	0.655709	FEM1C	1.76421e-08	0.484086	TMEM30A
			0.000611466	0.254228	VAMP5							1.30808e-05	0.815035	TRIM5							7.19352e-07	0.59924	PVT1	1.4948e-12	0.785154	CARD14	2.51693e-06	0.942125	LOXL2				0.0061022	0.321234	GPBP1	8.56878e-07	0.512197	DSTN	1.7674e-08	0.392054	RPL27A
			0.00061668	0.27624	ARMC10							1.3093e-05	0.638242	SMIM20							7.23417e-07	0.678799	RPGRIP1L	1.51507e-12	0.688523	CHP1	2.56142e-06	0.324117	AHDC1				0.00619417	0.388348	KIF6	9.72694e-07	0.741255	FAM13B	1.83871e-08	0.693762	NEAT1
			0.000617445	0.364973	MROH8							1.32388e-05	0.574956	DHRS4L2							7.41831e-07	0.368215	MRPL28	1.5191e-12	2.94382	NPHP1	2.58025e-06	0.58584	RNF122				0.00624283	0.264019	POLR3E	1.01104e-06	0.397909	PSMB7	1.87391e-08	1.38717	SF1
			0.000619686	0.374541	CUL1							1.34109e-05	0.613799	EAPP							7.49019e-07	0.471449	HMGCS1	1.52173e-12	4.00243	LINC00598	2.59692e-06	1.34424	ARFGAP1				0.00626691	0.313464	SKIV2L2	1.03154e-06	0.342394	EFCAB14	1.9032e-08	0.802553	AP2A1
			0.000621311	0.481999	COG8							1.3909e-05	0.726806	ZNF160							8.08843e-07	1.36819	OTUD7B	1.52619e-12	0.55131	ASGR1	2.64569e-06	0.607299	TMED3				0.00632316	1.37439	ERO1B	1.13094e-06	0.406172	YTHDF2	1.93586e-08	0.8134	ZDHHC7
			0.000627571	1.10659	ZFP90							1.39608e-05	1.60837	ZNF93							8.24075e-07	0.317689	PPP2CA	1.56328e-12	2.72237	BLOC1S2	2.70321e-06	1.13698	EML2				0.00636835	0.634006	PRKD2	1.1315e-06	0.376813	ATG101	1.95933e-08	1.58865	IMPA2
			0.000647705	0.293752	MEI1							1.4118e-05	0.447173	STK31							8.43115e-07	0.611363	ABHD17B	1.58939e-12	1.07997	GVINP1	2.89151e-06	1.80977	TTC38				0.00639682	0.678246	EZR	1.15233e-06	0.261458	AP4S1	2.1122e-08	0.319134	GPD2
			0.000653923	0.454273	PTPN18							1.41524e-05	1.93171	SPIN3							8.44488e-07	0.3801	GNPAT	1.61803e-12	0.370668	CASC15	2.90861e-06	0.854421	RDX				0.00641057	0.401432	SH2B3	1.19663e-06	0.72144	AGPAT4	2.12602e-08	0.375466	NAB1
			0.000658775	0.292216	ZNF226							1.41822e-05	1.26338	KNOP1							8.51556e-07	0.445338	ST8SIA4	1.72939e-12	1.69679	ZNF525	2.95623e-06	0.828716	OGFOD3				0.00642514	0.307682	TRIM22	1.24166e-06	0.748139	MED21	2.18104e-08	0.271741	BCL6
			0.000662238	0.523288	C1ORF123							1.42325e-05	1.05735	PEX11B							8.59131e-07	0.48292	RAB9A	1.79887e-12	1.35626	SNRPB	3.00455e-06	0.457834	FXN				0.00645652	0.740619	CDKL1	1.27692e-06	0.482809	CAMKK1	2.3049e-08	1.13852	C19ORF35
			0.000668727	0.853492	PAAF1							1.44484e-05	0.964198	KCTD7							8.60905e-07	0.452119	ZNHIT1	1.82777e-12	3.1012	AP1B1	3.16399e-06	1.00562	AFF1				0.00651786	0.716726	CERKL	1.29041e-06	0.259216	PIGA	2.35268e-08	0.335761	SPATA4
			0.000680277	0.627498	RPE							1.47145e-05	1.05333	MAD1L1							8.6905e-07	0.825802	TPMT	1.90467e-12	0.665694	KIAA1671	3.25062e-06	0.640959	ODC1				0.00652008	0.858096	LPAL2	1.34586e-06	0.391899	MLF2	2.4052e-08	1.18722	SENP7
			0.000694841	0.299271	PKN1							1.49124e-05	0.551517	HEATR5B							9.18848e-07	0.649506	PRDX4	1.90688e-12	2.86095	CCL28	3.27608e-06	0.546364	BID				0.00656595	0.880178	DNAJB6	1.36617e-06	0.449118	MRFAP1L1	2.48708e-08	1.13467	MYCBP2
			0.000706546	0.253007	C1QBP							1.50387e-05	0.530817	ALMS1							9.29992e-07	0.355877	NDUFA11	1.95906e-12	0.506484	NANOG	3.46657e-06	1.01563	SLC38A7				0.00658771	1.37828	TBC1D7	1.68518e-06	0.326959	TNFRSF21	2.50995e-08	1.25035	PRKCD
			0.000727043	0.256698	CASP4							1.51726e-05	0.83881	SNX27							9.51817e-07	0.38536	ETHE1	1.97511e-12	3.85652	IL2RA	3.5011e-06	0.260921	POLR2J				0.00662983	1.07807	SYNPO2	1.77798e-06	0.563386	PDCL3	2.5485e-08	1.29279	ARHGAP26
			0.000735812	1.91899	FCN1							1.51983e-05	0.721625	EXOC3							9.73393e-07	0.836497	MANEA	2.02778e-12	0.41878	ZNF26	3.85516e-06	3.91858	G0S2				0.00669102	0.763434	NUP58	1.78302e-06	0.315421	SPATS2L	2.56691e-08	0.355006	TMBIM1
			0.000741929	0.29073	MED10							1.52643e-05	0.922404	DGCR2							9.88113e-07	0.480407	DYNC1LI2	2.08468e-12	1.60319	NBPF9	4.05307e-06	1.04734	CD300A				0.00670186	0.398701	EGR1	1.85694e-06	0.254194	GHITM	2.66087e-08	2.48099	LMTK2
			0.000744465	0.946527	ATP8B1							1.54661e-05	0.472466	ZNF687							1.051e-06	0.375096	GNB2	2.20407e-12	0.904442	DEPDC5	4.41849e-06	0.510657	PSMG1				0.00697351	0.814904	MAP3K11	1.93102e-06	0.481829	NOL7	2.68472e-08	1.24357	FAM156A
			0.000756182	0.461621	GLOD4							1.54689e-05	0.365136	MYLK3							1.05762e-06	1.52367	FAM135A	2.21696e-12	0.650937	A2ML1	4.42768e-06	0.250189	ZNF519				0.00702698	0.570174	PIGS	1.95739e-06	1.25464	RBM14	2.71702e-08	0.698482	AKNA
			0.000757984	0.358257	RIPK3							1.54831e-05	0.451046	FUS							1.06351e-06	0.358467	SCAMP2	2.22422e-12	3.07209	ZFYVE26	4.4468e-06	0.99809	SFXN2				0.00706171	1.10373	LCOR	1.99758e-06	0.61753	IFI6	2.72434e-08	0.306637	RNASEH2B
			0.000758942	0.35544	MTHFS							1.55665e-05	0.832922	SPDYE2B							1.07069e-06	0.627172	QSOX1	2.23185e-12	2.3814	CASP8AP2	4.66122e-06	1.23076	UBE2H				0.0072544	0.29141	TINF2	2.0383e-06	0.252799	BLVRA	2.74735e-08	0.417826	RPL13
			0.00076225	0.580762	RNFT1							1.55833e-05	0.669893	TIGD1							1.07939e-06	0.31149	PTTG1IP	2.29146e-12	0.281896	GREM1	4.75518e-06	0.821074	ABCC3				0.00741472	1.56816	POLH	2.04018e-06	0.910942	PLEKHH3	2.75074e-08	0.495202	PPA2
			0.000767852	0.799701	PDAP1							1.56455e-05	0.668177	FAM78A							1.08863e-06	0.323567	DDX49	2.30321e-12	0.723747	PFDN5	4.91391e-06	0.350028	FARP2				0.00748284	0.43035	TBCD	2.07269e-06	0.541713	KANK2	2.77435e-08	0.596122	NUDT14
			0.000771762	0.328193	ZBTB8OS							1.57801e-05	1.00893	TPH1							1.16704e-06	0.272767	ECH1	2.31466e-12	4.76648	ZBTB37	5.96292e-06	1.1397	TPM1				0.00749701	0.302218	YTHDC1	2.16735e-06	1.72613	CLUHP3	2.79417e-08	1.19073	OXR1
			0.00077646	0.340932	ACBD6							1.58216e-05	1.08805	TFB1M							1.16874e-06	0.955542	GBF1	2.32641e-12	1.32506	SIDT1	6.07165e-06	0.757879	IPP				0.00753649	0.606192	RAD51	2.27666e-06	0.720269	CCDC115	2.89903e-08	1.19683	NIN
			0.000776835	0.263915	RPL32P3							1.60358e-05	1.20623	NOL9							1.23439e-06	0.832719	BCL2L11	2.40121e-12	1.20763	ATP6V0A2	6.21009e-06	1.32141	KLHL8				0.0075924	0.393176	TRAPPC3L	2.40778e-06	0.392402	ZNF664	3.02669e-08	0.277214	COMMD10
			0.000792578	0.282324	MTERF1							1.63351e-05	0.398259	CYP46A1							1.26428e-06	0.409589	SLC26A11	2.40735e-12	1.37518	HCLS1	6.37164e-06	0.268059	SIGMAR1				0.0076234	0.747857	ERGIC1	2.88285e-06	0.261533	USPL1	3.06066e-08	0.303434	KRTCAP2
			0.000799874	0.380595	CTC1							1.65566e-05	0.570238	ZNF800							1.33118e-06	0.523937	MAD1L1	2.44601e-12	1.98608	IBA57	6.52211e-06	0.256353	OAT				0.00763745	0.534337	SPATA6L	2.92974e-06	0.277717	S1PR2	3.13981e-08	1.16223	ARRDC1
			0.0008091	0.547956	KRCC1							1.65864e-05	0.790772	NPEPL1							1.34488e-06	0.942492	SAYSD1	2.50028e-12	0.65291	ZNF383	7.05734e-06	1.95153	CCDC144B				0.00776855	0.27997	CNST	3.07954e-06	0.586505	RPRD1B	3.1494e-08	1.403	MDM4
			0.000810955	0.44807	WDR37							1.66288e-05	1.58488	PAXIP1-AS1							1.36489e-06	1.59855	HPSE	2.54153e-12	1.53426	ACTR3	7.20929e-06	1.80526	TRPV3				0.00777136	0.350785	NDUFB2	3.29824e-06	0.456384	MIS12	3.15268e-08	0.51546	ERO1A
			0.000832851	0.259139	SHARPIN							1.66853e-05	1.39315	ALDH6A1							1.46745e-06	0.614676	MYEF2	2.58976e-12	1.20478	ZNF684	7.42652e-06	0.270224	GPAA1				0.00797369	0.446218	DENR	3.89406e-06	0.974239	CDKAL1	3.16785e-08	1.28168	PREX1
			0.000847363	0.396659	COG2							1.67517e-05	0.705208	TACC3							1.48464e-06	0.381364	MRPL13	2.63043e-12	3.12621	OSBPL10	7.50973e-06	2.28476	ACVR2B				0.00797779	0.611748	CAPN2	3.95625e-06	0.349966	GPR35	3.18189e-08	0.649866	PQBP1
			0.000867898	0.265796	FIS1							1.68714e-05	0.701586	THAP11							1.67985e-06	0.364972	CMTM7	2.64672e-12	0.451603	PIK3R2	7.55062e-06	0.873038	EREG				0.00799716	0.4372	SF3A2	3.97308e-06	0.47158	RBFA	3.22194e-08	0.507838	SLC31A1
			0.000890937	0.750333	TRIM56							1.70019e-05	1.20252	DNHD1							1.70819e-06	0.319877	CYTIP	2.71172e-12	1.59401	FAM160B2	7.61234e-06	0.507138	CBR1				0.00803578	0.674866	SURF6	4.39436e-06	0.83924	ZDHHC20	3.2237e-08	0.309757	CHMP5
			0.000898061	0.393129	RER1							1.71628e-05	0.650762	CCDC180							1.73502e-06	0.801092	MCCC2	2.72753e-12	1.76713	LRCH3	7.69816e-06	0.667664	TMEM30A				0.00808488	0.986319	PRKCA	4.44569e-06	0.514997	PSMC3	3.25808e-08	1.36381	ABCC5
			0.000907066	0.504681	COPS5							1.7232e-05	0.361039	RPL32P3							1.73794e-06	0.333129	PDE6D	2.80221e-12	0.742087	PRSS23	7.97405e-06	2.14781	DST				0.00824921	0.269747	NIT1	4.93458e-06	0.522998	PPM1D	3.27771e-08	0.760501	DUSP7
			0.000924578	1.0936	WDR92							1.73191e-05	1.09524	HOOK2							1.74007e-06	0.73703	PPIL1	2.84384e-12	0.83552	HNRNPH1	8.38167e-06	0.367568	COX6B1				0.00840171	0.591535	VPS4B	4.94676e-06	0.321158	SIN3A	3.30211e-08	1.16036	TACC3
			0.000926958	0.423184	ADH5							1.74955e-05	1.00069	CCDC18							1.76759e-06	0.453111	TOR1AIP1	2.84836e-12	1.22649	MIR100HG	8.59413e-06	1.00545	GBA				0.00841015	0.282147	PDS5B	5.00303e-06	0.791949	PPP2R2B	3.30997e-08	0.490382	MRPL51
			0.000945392	0.34439	FAM161A							1.79189e-05	0.92214	CWF19L2							1.77287e-06	0.300391	UQCRB	2.86879e-12	0.803015	DACT3	8.63412e-06	0.883838	C4ORF36				0.00841361	0.361614	DALRD3	5.65013e-06	0.496845	EMC7	3.32258e-08	0.828572	SH3BP1
			0.000957287	0.329169	PQLC3							1.79477e-05	1.24225	PTGR2							1.86049e-06	0.575572	UHRF1BP1L	2.95625e-12	0.441591	SCAND2P	8.7423e-06	0.456038	PTPMT1				0.00853253	0.508841	NUDT1	6.15344e-06	1.00031	ZNF286B	3.4048e-08	1.36814	KANSL1
			0.00096178	0.313606	GRAMD1A							1.81063e-05	0.835191	CHTF8							1.92322e-06	1.66797	QPRT	2.99732e-12	0.89283	GEMIN6	8.87066e-06	2.46877	ASRGL1				0.00853821	0.264587	KRI1	6.44887e-06	0.791008	CEACAM1	3.43191e-08	1.88897	DGKD
			0.000978352	0.370924	IFFO1							1.81171e-05	0.787422	NKAP							1.92799e-06	0.389423	SOCS1	3.28328e-12	3.45412	LINC01012	9.95529e-06	1.18648	C21ORF33				0.00858416	0.32827	HEXIM1	7.36976e-06	0.351803	PSMA2	3.67222e-08	0.85789	B4GALT5
			0.000981083	0.458029	USP5							1.82764e-05	0.617567	MLXIP							1.95388e-06	0.296343	REEP3	3.30471e-12	1.75099	GPATCH11	9.9687e-06	1.57862	ICA1				0.00860518	0.33815	RAP1A	7.84238e-06	0.505258	IFT27	3.75756e-08	0.472091	MRPS28
			0.00100816	0.344839	UPP1							1.85036e-05	0.522508	RAB29							1.99595e-06	0.31364	RHOH	3.31877e-12	2.54947	CAPN15	1.01253e-05	0.523316	CEP76				0.00868916	0.685872	KCNJ2	7.88182e-06	0.616706	SNRNP27	3.8687e-08	0.640249	SDF2
			0.00102846	0.32705	SEC13							1.86525e-05	0.85267	SPG20							2.01129e-06	0.600584	MAPK6	3.33995e-12	1.3261	ENAH	1.08781e-05	0.599013	MBTPS1				0.00871154	0.464418	MARS	8.52244e-06	0.609057	ZNF684	3.93427e-08	0.950141	KIAA0430
			0.00103025	0.303868	SERGEF							1.92165e-05	0.510965	SRSF11							2.07071e-06	0.432764	ZNF706	3.55773e-12	0.559869	MT-ND4	1.16578e-05	0.566365	SNAP47				0.00876599	1.41334	SLMAP	8.53217e-06	0.360265	GCDH	3.95296e-08	0.538325	RGS19
			0.00103313	0.271006	HNRNPF							1.93315e-05	0.536222	HERC4							2.24878e-06	0.278771	EID1	3.65442e-12	3.37135	PRKY	1.22113e-05	3.6657	PLPP2				0.00887289	2.19613	ARNTL2	8.54514e-06	0.288	MAFF	3.97579e-08	1.11976	C14ORF159
			0.00105917	0.267046	MAGEH1							1.94891e-05	0.617173	NUMA1							2.2811e-06	0.30013	TLK1	3.70279e-12	0.515947	NPFFR1	1.40573e-05	0.25765	TIMM9				0.00896706	1.70448	STAT3	8.63121e-06	0.365453	GLT8D1	4.0353e-08	0.618419	GBP2
			0.00106422	0.588037	DAG1							1.97009e-05	0.90729	SUN1							2.4721e-06	0.251988	EML2	3.80852e-12	1.49212	MTO1	1.49345e-05	1.08822	AKAP2				0.00923164	0.267665	CSTB	8.8981e-06	0.259979	PTBP2	4.05756e-08	0.269132	FUCA2
			0.00107187	0.402023	RWDD2B							1.97886e-05	0.626077	RABL3							2.58924e-06	0.45324	ITFG1	3.93269e-12	2.24833	HERC4	1.52711e-05	2.42872	EHD4				0.00925545	0.279431	GGT6	8.99226e-06	0.463098	CMSS1	4.67971e-08	0.313906	FDX1
			0.0010912	0.619439	PTK2							1.9969e-05	1.19467	MPI							2.60454e-06	0.32911	FAM120A	4.08119e-12	1.17813	ZDHHC15	1.5353e-05	0.698132	STUB1				0.00926246	1.06568	JMY	9.16018e-06	0.357992	MAGT1	4.91972e-08	1.69813	IFFO1
			0.00110359	0.280337	FKBP3							2.05887e-05	0.828044	SGF29							2.67328e-06	0.888544	LGALS9	4.11932e-12	2.83811	SCAI	1.5613e-05	0.475816	LINC00891				0.00930488	0.94179	FAM102B	9.53849e-06	0.461509	SMARCE1	5.05845e-08	1.13751	GIT2
			0.00112387	0.395611	DTX3L							2.10402e-05	0.516992	WDR78							2.77069e-06	0.496454	KIAA1161	4.21426e-12	2.40503	AES	1.56814e-05	1.50838	SLC24A4				0.00930937	1.81496	SHOX	1.05897e-05	0.476381	ZNF428	5.10385e-08	0.458152	C19ORF53
			0.00112398	0.321481	ANAPC7							2.11286e-05	1.01001	RNF20							2.85208e-06	0.347188	RNF10	4.28684e-12	0.613125	RDH13	1.57319e-05	1.09063	ST8SIA4				0.00932787	0.307719	ZNF761	1.06225e-05	0.376606	KRR1	5.10477e-08	0.525935	XRCC6
			0.00115576	0.283433	GTF2IP1							2.20828e-05	0.676604	ZNF320							2.88175e-06	0.274587	MXD4	4.35857e-12	0.566755	NAALADL2	1.59163e-05	1.39116	CD160				0.00934949	0.734041	AFAP1	1.24034e-05	0.406021	ARFGAP2	5.24622e-08	0.626704	SPIDR
			0.00115696	0.384349	NSUN6							2.22428e-05	1.04381	EEA1							2.88847e-06	0.435348	PLIN3	4.40778e-12	1.4577	MBD4	1.60965e-05	0.272515	FAM98C				0.00939051	1.8931	CCBE1	1.2608e-05	0.717609	KLHL9	5.24926e-08	0.99491	SMARCAD1
			0.00117717	0.265506	ZFC3H1							2.25156e-05	1.67733	KLRK1							2.92475e-06	0.597658	DNAJC25-GNG10	4.45643e-12	0.686513	CRISPLD2	1.61592e-05	1.66034	SPAG16				0.00942415	0.433194	USE1	1.43647e-05	0.550354	KLHL15	5.27681e-08	0.971229	YIPF2
			0.0011895	0.538459	METAP1							2.32309e-05	1.20781	N4BP2							2.93247e-06	0.950317	FAH	4.62556e-12	1.43852	RALGPS2	1.63883e-05	2.25901	NADK2				0.00943397	0.336159	ITPRIPL2	1.44264e-05	0.398053	TXNDC15	5.41926e-08	0.30831	PFDN1
			0.00119161	0.357432	MSH2							2.33335e-05	0.948407	SCRN3							2.94536e-06	0.329096	DNAJA4	4.77442e-12	1.9166	MAP3K7CL	1.70785e-05	0.878047	PCBD2				0.00950458	0.421023	PTRF	1.44551e-05	0.256103	GMPS	5.45687e-08	0.847533	KLF3
			0.00121712	0.362169	MIF4GD							2.37496e-05	0.372126	ACAP1							3.03974e-06	0.348253	ANAPC11	4.79733e-12	0.43529	PEX26	1.74871e-05	1.33108	MLLT3				0.00958007	0.61217	CCDC170	1.49379e-05	0.850297	NSFL1C	5.46267e-08	0.757995	PLEKHM1P1
			0.00121798	0.409572	GGA1							2.38694e-05	1.39067	SMPD1							3.14548e-06	0.305148	PEX3	4.82642e-12	1.20525	DNAL1	1.75642e-05	0.475414	YIPF6				0.00959948	0.617469	BNIP3L	1.51983e-05	0.651805	GPN2	5.50021e-08	1.06191	PLAGL1
			0.00128377	0.849122	NAIP							2.41064e-05	0.654106	HMGA1							3.17196e-06	0.353415	PSMB2	4.88343e-12	1.91635	KRI1	1.76423e-05	0.418574	ZGPAT				0.00971041	1.28738	PHF10	1.52907e-05	0.77511	TEX41	5.68929e-08	2.71379	MPP7
			0.00130759	0.410835	ARRDC1							2.44079e-05	0.802655	HERC3							3.20744e-06	1.48389	ARL11	4.90016e-12	2.77043	MAP3K14	1.79621e-05	0.77888	NMRK1				0.0097204	0.591648	CCDC14	1.57139e-05	1.43921	SERF1A	5.76366e-08	1.39341	ABAT
			0.00132517	0.433801	GNS							2.51476e-05	0.497628	APRT							3.22372e-06	1.2532	MYL6B	4.97831e-12	0.399184	PRCP	1.85807e-05	1.83449	SULT1A1				0.00975812	0.710799	ZNF765	1.61455e-05	0.399702	GNL1	5.78277e-08	0.641568	CYP51A1
			0.0013312	0.289015	BRWD1							2.52044e-05	0.365452	MAP4K2							3.24395e-06	0.720774	EEF2K	4.98866e-12	2.61007	MECP2	1.86231e-05	0.26479	CXXC1				0.00980926	0.391576	CTBP1	1.71846e-05	0.526613	ARSK	5.871e-08	0.425648	CLCN3
			0.00133192	0.574368	TRIM27							2.56203e-05	0.545699	ZNF44							3.36371e-06	0.384811	IRF2	5.03137e-12	1.34886	R3HDM4	1.94854e-05	1.07166	SLFN5				0.00981387	0.813293	PLIN2	1.87212e-05	0.51548	KPNA2	5.94893e-08	0.493273	ARIH2
			0.00135492	0.410317	NOSIP							2.61045e-05	1.36889	NBPF3							3.58544e-06	0.358051	COX16	5.18199e-12	1.6631	ROCK1	1.98014e-05	0.874851	LCORL							1.87582e-05	3.00035	FZD3	5.99374e-08	1.51555	SCPEP1
			0.00135516	0.744067	ARL10							2.629e-05	1.13347	LUC7L							3.68552e-06	0.554144	WDTC1	5.18337e-12	1.67281	ZNF675	2.04542e-05	0.382102	PSMC4							2.06092e-05	2.06821	POU2AF1	6.03624e-08	0.803689	SP100
			0.00136487	0.348145	C5AR2							2.63661e-05	2.25428	ACSL1							3.70897e-06	0.648889	LAG3	5.20568e-12	0.417379	LRRC57	2.11535e-05	1.43788	MDM2							2.11559e-05	0.647454	RPF1	6.08107e-08	0.453174	CD48
			0.00139242	0.28756	MEAF6							2.67799e-05	0.649294	ATXN3							3.74091e-06	0.649498	ZFP36L1	5.25679e-12	1.77667	RBM34	2.26722e-05	1.47239	PLXDC2							2.23744e-05	0.597928	ZNF587	6.16775e-08	0.570074	C1ORF56
			0.00145162	1.01955	AGO4							2.73764e-05	1.04281	UBE2G2							3.92373e-06	0.27385	TUBA1A	5.31217e-12	1.0797	FBXL18	2.27879e-05	0.540903	NAV1							2.27995e-05	0.56911	SARS	6.19014e-08	0.292487	COX7A2
			0.00147759	0.307235	ABHD10							2.79594e-05	0.373533	PCF11							3.93815e-06	0.262329	SH3KBP1	5.47566e-12	2.07491	ZNF91	2.30304e-05	0.788761	VARS							2.3941e-05	0.423325	IL2RG	6.21334e-08	0.377436	MGEA5
			0.00148105	0.294887	NMI							2.91527e-05	1.23984	PLA2G4B							3.95064e-06	0.5993	KIAA0430	5.50198e-12	1.83055	LYPD5	2.43115e-05	0.953214	CYHR1							2.40773e-05	0.637209	AK3	6.22092e-08	0.328947	ETNK1
			0.00148641	0.79959	TTC31							2.93534e-05	1.169	MSH2							3.95757e-06	0.695332	PIEZO1	5.53212e-12	5.16707	DENND5A	2.53918e-05	0.266435	UQCRC1							2.41339e-05	0.270234	CCDC25	6.2548e-08	1.40706	HOMER2
			0.00148967	0.429253	THAP11							2.95388e-05	1.79143	LMO7							3.96698e-06	0.526251	UBE2Z	5.55071e-12	1.15145	EXOSC6	2.78433e-05	6.31156	CCL4							2.45499e-05	0.861084	CTPS2	6.53292e-08	1.11953	ADA
			0.00149692	0.62176	DPH7							2.96497e-05	1.56494	C1ORF56							4.06191e-06	0.580337	NT5C3A	5.55561e-12	1.59316	DGKA	2.88979e-05	0.522189	ZBTB8OS							2.48061e-05	0.513308	PMPCA	6.55596e-08	0.414903	YIF1B
			0.00153769	0.279823	SHKBP1							2.99056e-05	1.45085	NPIPA1							4.11212e-06	0.31063	RAB1A	5.7391e-12	1.33057	PKD2L2	2.89676e-05	1.22521	COQ4							2.49248e-05	0.252209	SPTLC1	6.67269e-08	1.28211	CELF1
			0.00154168	0.348106	IARS2							3.01189e-05	1.00006	UBXN11							4.43646e-06	0.321954	PFKP	5.7735e-12	0.994235	MATK	2.91993e-05	2.33407	PRMT5							2.55632e-05	0.48164	RBBP4	6.81756e-08	1.10856	RBM7
			0.00154259	0.396926	HMG20A							3.06128e-05	0.479637	ZNF726							4.51594e-06	0.260087	AURKAIP1	6.02386e-12	0.909915	AP1S3	3.00192e-05	0.660483	ETFDH							2.60982e-05	0.695896	MOCOS	6.86767e-08	0.963764	AGPS
			0.00154362	0.403864	NBN							3.07041e-05	1.13728	CEP170							4.53011e-06	0.325002	FAM214A	6.05394e-12	3.40463	MEIOC	3.08797e-05	1.00034	FHIT							2.68233e-05	0.361068	GADD45GIP1	7.04462e-08	0.306044	RETN
			0.00155168	0.2699	PMS2P1							3.09653e-05	1.00117	CNPY4							4.76178e-06	0.407972	ZNF281	6.1894e-12	1.74501	DENND1C	3.10579e-05	0.283513	IFI35							2.83438e-05	0.686381	UMAD1	7.29258e-08	0.523942	ARHGAP5
			0.00160477	0.348516	TBC1D14							3.11628e-05	0.805405	BSDC1							5.06282e-06	0.434833	CLDN4	6.23881e-12	0.742441	RBM28	3.43647e-05	0.660259	MBD2							2.9858e-05	1.19577	HMCES	7.52054e-08	0.465279	VEZT
			0.00160511	0.494361	GART							3.12793e-05	1.72051	LINC00094							5.14186e-06	0.295592	CD2BP2	6.27334e-12	0.308268	TMEM266	3.51065e-05	2.89912	MGAT4C							3.1304e-05	1.69965	FCRL1	7.61893e-08	0.775328	TUBA4A
			0.00161294	0.291165	PIGC							3.16727e-05	0.729476	PRKAG2							5.25221e-06	0.668974	NCOA1	6.28373e-12	0.708799	KCNE4	3.71485e-05	4.25973	ZNF555							3.21276e-05	0.269896	ZFYVE27	7.77565e-08	0.398867	RPL23A
			0.00163168	0.254405	NPIPA1							3.18103e-05	1.93785	ZNF844							5.37032e-06	0.261869	2022-03-07	6.43588e-12	1.79677	SNAP23	3.73285e-05	0.453093	SLC25A29							3.27285e-05	0.274831	ZPR1	7.81836e-08	1.15388	EVI5
			0.00163639	0.540959	MTA2							3.18224e-05	0.703601	SLC35A5							5.45432e-06	0.354233	TSPAN14	6.61809e-12	1.77895	ARHGAP25	3.8224e-05	0.423798	NUB1							3.43976e-05	0.500489	NUP160	7.97029e-08	0.547681	KIF5B
			0.00165698	0.344714	PSMD5							3.18309e-05	0.588392	CRYZL1							6.25568e-06	0.339964	UBE2K	6.67083e-12	0.368548	FAM227A	3.89973e-05	0.266284	NDUFS3							3.73734e-05	0.293473	CAPZA2	8.0047e-08	0.387997	CCT6A
			0.00165844	0.294776	HKR1							3.21951e-05	0.924821	ANKRA2							6.53655e-06	0.347257	MKNK1	6.75427e-12	0.795157	TSPAN14	4.13412e-05	0.329925	ADORA2A							3.80333e-05	0.258856	NDRG3	8.06979e-08	1.23319	CARD9
			0.00168061	1.25213	SCRG1							3.22422e-05	0.32957	CNBP							7.20177e-06	0.476437	TMEM160	6.94512e-12	0.603826	WHAMMP2	4.25546e-05	0.994404	PPIP5K1							4.00468e-05	1.40265	FANCC	8.11263e-08	0.711897	TNPO1
			0.00178396	0.473272	UPF3A							3.25501e-05	0.594746	IFNAR1							7.46627e-06	0.283348	VPS25	6.99348e-12	1.24624	JAK1	4.37082e-05	3.60604	ABCB9							4.40467e-05	0.531861	TIMM23	8.22361e-08	0.427184	PRKRA
			0.00181364	0.558556	EIF4G3							3.26148e-05	0.804005	NDE1							7.55871e-06	0.307835	PIGS	7.01403e-12	1.57022	UNC80	4.37468e-05	0.254069	STARD7							4.63543e-05	0.463209	ZC3H11A	8.25837e-08	0.25543	SLFN13
			0.00184761	0.47541	RAD51							3.28446e-05	0.86742	QTRT1							7.67167e-06	1.51259	MCAM	7.26156e-12	1.73423	PCNX4	4.43138e-05	0.420936	PRKAG2							4.68017e-05	0.328729	DNMT3A	8.28799e-08	0.611812	ALKBH7
			0.0018557	0.59217	MTMR10							3.34497e-05	0.478035	GTF3A							7.73639e-06	0.709287	ASL	7.32863e-12	1.51943	MYH7B	4.47714e-05	0.527661	HAUS2							4.89736e-05	0.261522	SLC25A32	8.69577e-08	0.469436	DOK3
			0.00186895	0.410488	ZNF76							3.34919e-05	0.864171	SNAPC3							7.83195e-06	0.678639	BCAP29	7.39662e-12	3.51992	ZNF260	4.49144e-05	0.995545	HSPD1							5.0091e-05	0.426148	RYBP	8.9802e-08	1.36065	ICA1L
			0.0018793	0.367117	FAAP24							3.43961e-05	0.972575	ZFAND1							8.70355e-06	0.689343	NF1	7.66121e-12	2.67736	SC5D	4.68753e-05	1.93628	C2ORF91							5.19213e-05	0.300241	KIF21B	9.03164e-08	1.21579	RAB12
			0.0019271	0.367034	CNOT7							3.44608e-05	0.676981	VGLL4							9.0579e-06	0.899801	IRS2	7.67053e-12	1.12558	SCUBE1	4.71102e-05	0.445704	UBE3D							5.22509e-05	0.365409	ZDHHC2	9.23349e-08	1.11658	TTC39C
			0.00197502	0.421067	DCAF5							3.52815e-05	0.624242	PPP1R21							9.14833e-06	0.415318	PTPRA	7.80585e-12	0.424588	C8ORF59	4.74819e-05	0.313532	DGKE							5.2656e-05	0.250848	BCAP29	9.42791e-08	0.31171	EID1
			0.00199165	0.338987	DCAF8							3.58053e-05	0.699381	ASTN2							9.16996e-06	0.456395	TSG101	8.25164e-12	2.52786	EIF4G3	4.75466e-05	1.21717	IL5RA							5.33348e-05	0.263083	MPP4	9.55559e-08	0.411899	GBP5
			0.00200411	0.33439	ADAM8							3.65027e-05	0.424041	EFHC1							9.2111e-06	0.789142	VNN3	8.37874e-12	1.60857	ARID1A	4.80877e-05	0.971913	MAFF							5.33723e-05	0.294325	RLIM	9.96728e-08	0.584549	SLC9A1
			0.00201984	0.261669	DGKD							3.65585e-05	0.872469	TRUB2							9.33489e-06	0.345342	STIM1	8.40171e-12	1.21791	ANKLE2	4.83468e-05	0.972053	ATR							5.38345e-05	0.399542	UBE2N	1.00015e-07	0.870438	UBR1
			0.00202928	0.31988	STK26							3.6661e-05	0.444669	ICE2							9.54777e-06	0.487908	E2F3	8.81938e-12	0.863173	COX4I1	4.84637e-05	1.63383	MALL							5.42471e-05	0.343318	NOMO3	1.00346e-07	0.65483	RPL22L1
			0.00204877	0.377928	SEC22B							3.72043e-05	0.901891	SLC30A2							9.65182e-06	0.315628	EIF4E	8.86855e-12	0.382557	PRSS27	5.37888e-05	0.887593	AAK1							5.86771e-05	1.17517	FGGY	1.00432e-07	1.52776	FLI1
			0.00207445	1.03735	C6ORF203							3.87308e-05	1.35532	ZNF623							9.72565e-06	1.11343	NCOR2	8.88159e-12	1.54641	MORC3	5.39552e-05	0.717793	MCC							5.94224e-05	0.293705	TXNL1	1.00821e-07	0.901859	SLC27A3
			0.00211956	0.717673	GIPR							3.93611e-05	0.658518	RGS14							9.79776e-06	0.261069	BUD31	8.93577e-12	2.28261	RFTN1	5.68672e-05	1.28331	TSC22D1							5.95747e-05	0.281275	C18ORF32	1.01691e-07	0.722369	BCAP29
			0.00215894	0.365095	EPRS							3.94182e-05	1.04417	MOCS2							9.99276e-06	0.353676	LSM10	9.28801e-12	1.14038	LINC00652	5.76932e-05	0.40896	FOSL2							6.04125e-05	0.384258	PUF60	1.05497e-07	0.690089	ANXA6
			0.00219506	0.552476	MATK							4.02759e-05	0.463713	ZAP70							1.0073e-05	0.329494	SMIM19	9.63891e-12	0.273777	IL7R	6.21468e-05	0.508942	ATF5							6.30643e-05	0.583177	TNFRSF10D	1.08147e-07	1.41495	ESRRG
			0.00224887	0.85778	CCDC150							4.07822e-05	0.780197	PMS2							1.02637e-05	0.41661	SKA2	1.00572e-11	0.435184	MARVELD3	6.24862e-05	0.542954	ME2							6.36055e-05	0.401099	NFU1	1.19443e-07	0.757393	RCC2
			0.00228967	0.340065	DCN							4.10071e-05	0.681873	MCF2L							1.03767e-05	0.281735	FBXL15	1.02496e-11	1.29023	DDX17	6.33997e-05	0.823664	COG3							6.4299e-05	1.34919	LARP4B	1.21258e-07	0.505507	ANKH
			0.00232237	0.704636	HIST1H4C							4.18743e-05	1.11183	FAM200B							1.03916e-05	0.263995	RAB8B	1.03328e-11	1.45668	MORN3	6.40161e-05	1.4982	MTFP1							6.71933e-05	0.449907	TSPAN4	1.22496e-07	0.287579	SLC8B1
			0.00236753	0.419267	IVD							4.21555e-05	0.78961	SEC22B							1.04812e-05	0.324772	COA3	1.03739e-11	1.28846	KAT6A	6.54106e-05	1.64712	VPS13D							7.00346e-05	0.569589	C7ORF50	1.22725e-07	0.639139	TCF12
			0.00237929	0.35999	FOXN3							4.22133e-05	1.59375	TMEM45B							1.05049e-05	0.398898	OGDH	1.08822e-11	1.21088	ZNF101	6.81474e-05	1.00295	ATP8B2							7.01529e-05	0.454288	CCDC94	1.23752e-07	0.619061	COMMD1
			0.00238336	0.390673	UNC50							4.26896e-05	0.751107	NUP160							1.08257e-05	0.374047	RALB	1.09234e-11	2.24625	VGLL4	6.92128e-05	2.7261	PGPEP1							7.24335e-05	0.405918	LY6G5C	1.23797e-07	0.454385	NUDT1
			0.00240538	0.57143	P2RX5-TAX1BP3							4.2777e-05	0.379989	RNF44							1.14495e-05	0.255898	STAT5A	1.10206e-11	0.700096	SCN3B	7.16424e-05	3.0081	SLC16A1							7.26361e-05	0.351312	DNAJB11	1.27314e-07	2.00413	ZNF414
			0.00240763	0.546672	ORAOV1							4.28855e-05	0.652589	SH2D3C							1.15794e-05	0.323492	AP5S1	1.11874e-11	0.557672	ATG14	7.21406e-05	0.834498	KNTC1							7.55515e-05	0.263639	SYNJ2	1.27822e-07	0.415815	HIVEP3
			0.00246036	0.464196	VPS25							4.29818e-05	1.37446	C6ORF203							1.19642e-05	0.630847	CCR4	1.12995e-11	0.25438	ALPK1	7.7355e-05	0.465318	OAS1							7.59542e-05	1.12267	RFX3	1.29841e-07	0.746641	APIP
			0.002471	0.313524	VPS51							4.32211e-05	0.842065	PRPSAP2							1.24749e-05	0.495109	PPP4R2	1.13507e-11	1.28325	TNFAIP8L1	7.766e-05	1.15208	LLGL2							7.61426e-05	0.663285	ACE	1.30355e-07	0.635604	RPL26
			0.00247269	0.436154	TRIM72							4.38475e-05	0.870992	METTL21A							1.25927e-05	0.25754	CASP3	1.13735e-11	1.6882	FLOT2	7.78451e-05	1.22274	VAT1							7.87339e-05	0.521394	MAP3K2	1.32561e-07	0.724648	PTRHD1
			0.00248319	0.443311	ARL16							4.4147e-05	1.25704	ZNF606							1.29395e-05	0.454216	CRIPT	1.16722e-11	0.309252	RPS28	8.06157e-05	0.256423	DPYD							7.9767e-05	0.562937	NDUFAF6	1.33629e-07	1.37457	SNAPC3
			0.00249454	0.767868	SLC25A45							4.47313e-05	1.22398	ZNF573							1.3004e-05	1.11899	LACTB	1.18719e-11	2.93166	PPP1R18	8.19841e-05	1.19881	PRR3							8.01762e-05	0.299238	MFSD14A	1.36172e-07	0.649896	ARHGEF3
			0.00255876	0.327026	VHL							4.49008e-05	0.951741	TRMT10B							1.31921e-05	0.319842	GBP1	1.26332e-11	2.4063	FBXL2	8.3405e-05	0.384997	KEAP1							8.16931e-05	0.407799	SIGLEC10	1.36395e-07	1.06659	FAM120A
			0.00258422	0.338847	UHMK1							4.49153e-05	0.780147	GGA1							1.32254e-05	0.316578	MYO18A	1.27341e-11	1.45178	BAZ1A	8.45126e-05	0.507304	FASTKD1							8.18681e-05	0.266222	GYG1	1.43848e-07	1.03646	MGMT
			0.00259395	0.414297	NUP62							4.54012e-05	1.69697	ZNF440							1.37609e-05	0.402856	RBX1	1.34032e-11	1.8551	ARL6IP5	0.000102864	1.9551	NET1							8.25348e-05	0.252901	QRICH1	1.44449e-07	0.441956	PPP1R2
			0.00259723	0.435456	SRD5A1							4.5811e-05	0.3281	TNFAIP8							1.38391e-05	0.48502	HYOU1	1.34351e-11	0.443564	GPALPP1	0.000104089	0.279024	UTP11							8.60517e-05	0.538296	ZNF808	1.44644e-07	0.638704	ADGRE5
			0.0026447	0.66143	PIAS2							4.61488e-05	0.947829	WDR77							1.39597e-05	0.682371	B3GNTL1	1.36742e-11	0.709992	AP3B2	0.000104219	1.03603	ERC1							8.72094e-05	0.522094	RARRES3	1.44662e-07	0.793406	CLIP2
			0.00264548	0.364053	RAP1GDS1							4.65616e-05	1.08605	HSPBAP1							1.40657e-05	0.664981	CERS4	1.44118e-11	0.975642	HNRNPC	0.000109081	2.00311	CDH1							8.88114e-05	0.480887	PDLIM5	1.48333e-07	1.12835	PNN
			0.00265341	0.501434	MTERF4							4.69654e-05	0.542633	ARGLU1							1.51203e-05	0.542905	BAX	1.44276e-11	1.17873	FAM175A	0.000111273	0.505388	ZNF511							8.92633e-05	1.41066	PGBD5	1.55645e-07	0.484469	NDUFB11
			0.00265709	0.339613	NR2C1							4.74929e-05	0.441234	CLN3							1.53944e-05	0.269304	NDUFS8	1.52966e-11	1.76246	PAXIP1	0.000111679	0.369844	DGKH							9.00618e-05	0.551225	CFAP20	1.56706e-07	0.2813	TAF9
			0.00266593	0.547678	EIF2B2							4.76179e-05	0.83847	UNKL							1.58563e-05	0.476414	NR4A1	1.64143e-11	0.33051	RBBP5	0.000111995	1.63789	ZFP64							9.14124e-05	0.427225	COMMD3-BMI1	1.58927e-07	1.85188	SNX30
			0.00266781	0.365995	MRPL19							4.8232e-05	1.49258	MRPS27							1.5879e-05	0.352467	SRPK1	1.64345e-11	0.929801	PSMB9	0.000113103	0.256163	ALCAM							9.64735e-05	0.505667	RAB3GAP1	1.63762e-07	0.321036	DYNLRB1
			0.00268113	0.395126	THOC7							4.84961e-05	0.341124	URI1							1.5919e-05	0.260184	HLA-F	1.68958e-11	2.4934	SLC16A10	0.000114464	3.45783	TMEM45A							9.81066e-05	0.619478	MRPS22	1.64058e-07	0.333455	GMPPB
			0.00269761	0.294013	DDX41							4.90786e-05	1.04949	TMEM38B							1.65689e-05	0.435949	NDUFB11	1.6937e-11	1.55926	SYNJ2BP	0.0001166	1.36059	PLOD3							9.87323e-05	0.316689	FAH	1.66974e-07	0.279919	TBL1XR1
			0.00270748	0.831498	ZNF559							5.0201e-05	1.04137	ZNF770							1.68594e-05	0.344034	GABPB2	1.72154e-11	2.11969	PLEKHG2	0.000118946	2.29224	C2ORF88							9.93612e-05	0.425039	PRKAB1	1.67642e-07	0.524227	RIOK3
			0.00273117	0.632662	HIST1H2BN							5.09954e-05	0.499099	HDAC7							1.70632e-05	0.415561	SNAP47	1.72524e-11	1.84378	NPIPB3	0.000126594	1.35582	NUGGC							0.000104699	0.935358	XIAP	1.6781e-07	0.374467	MT-ND2
			0.00274174	0.256549	MRPL43							5.1746e-05	0.942923	FITM2							1.71244e-05	0.2516	JMY	1.72624e-11	1.57038	ZNF333	0.000128686	0.458538	CYSTM1							0.000110167	0.328588	NCALD	1.68579e-07	0.252067	PPP3CA
			0.00274924	0.855005	KDM4B							5.27086e-05	1.14451	ALG14							1.77084e-05	0.293211	FIBP	1.72879e-11	0.352303	CATIP	0.000136914	2.67174	NCAPD2							0.000110417	0.498779	TSG101	1.68992e-07	0.347683	OSGEP
			0.00277221	0.615188	SLFN13							5.43716e-05	0.898646	CCDC88A							1.92347e-05	0.460447	DUSP23	1.7434e-11	0.815172	ERBB2	0.000140475	0.439095	ZNF844							0.00011144	0.486642	MTR	1.73489e-07	0.441136	PSMD2
			0.0028298	0.730521	SLF2							5.50453e-05	0.966254	ILVBL							1.95844e-05	0.25804	ANXA11	1.79395e-11	0.362895	ZNF584	0.000142013	0.38308	C2ORF68							0.000111545	0.510939	ZNF793	1.74009e-07	0.920162	CACNA1A
			0.00283622	0.505042	NCALD							5.50797e-05	0.699627	RECK							2.11799e-05	0.419525	TACC1	1.84738e-11	1.72764	RASEF	0.0001571	0.561135	GYG1							0.00011393	0.438922	C15ORF52	1.91893e-07	1.07788	CDC42EP3
			0.00283854	0.323314	ULK3							5.52178e-05	0.457164	ZNF18							2.13523e-05	0.520563	HSP90AB1	1.90104e-11	0.843921	C6ORF141	0.00015818	0.332445	ZNF264							0.000114351	0.800018	CCDC97	1.98456e-07	0.903743	UNC119
			0.00283932	0.420054	SEC11A							5.55328e-05	0.333985	C1S							2.15893e-05	0.373379	NABP2	1.91298e-11	2.71274	TAOK1	0.000170465	0.878981	MAZ							0.000118481	1.81524	SYNJ2BP-COX16	1.99573e-07	0.974536	RDX
			0.00287046	0.257556	IDH3B							5.69744e-05	1.56516	NR2C2							2.2215e-05	0.412993	RFXANK	1.96862e-11	0.988161	ZNF426	0.000173831	1.05939	SLC17A5							0.00012011	0.521531	ZNF622	2.0498e-07	0.396122	ZDHHC20
			0.00288512	0.924712	BBS2							5.7107e-05	0.523051	ANKRD36B							2.22294e-05	0.607265	RFK	1.98671e-11	1.97543	TTLL3	0.000179306	0.440389	DCUN1D3							0.000121561	0.757197	C1GALT1	2.08749e-07	0.369751	MB21D1
			0.00291875	0.46359	MRPS21							5.71759e-05	0.681287	PCSK7							2.26802e-05	0.39156	C7ORF50	2.00795e-11	0.629735	PUS1	0.000182024	3.63224	GSTM3							0.00012396	0.417608	BRAP	2.09222e-07	0.652729	IFITM1
			0.00292891	0.347331	SULT1A3							5.71774e-05	0.693157	SH3BP5							2.29881e-05	0.316138	ARL4A	2.02963e-11	0.406533	CYP1A2	0.000186585	1.17653	ZNF133							0.000124292	0.590717	STOM	2.1308e-07	0.569964	GOLGA2
			0.00293861	0.627704	ALG3							5.79904e-05	0.657776	ARL6IP4							2.33056e-05	0.643066	STK38L	2.06805e-11	0.874398	TNRC6B	0.000188498	0.492403	MLPH							0.000124449	0.805578	ZNF154	2.14328e-07	0.967944	SCYL1
			0.00295644	0.371873	SPATA13							5.83701e-05	1.00059	MIEF1							2.39593e-05	0.333034	MRPL21	2.09963e-11	2.77141	PARP12	0.000204597	0.495298	PARP2							0.000127398	0.507582	THUMPD1	2.18122e-07	1.39811	EZH1
			0.00304079	0.448957	CUX1							5.92529e-05	1.15724	HSD17B1							2.45262e-05	1.4018	KLF8	2.14442e-11	0.68645	SLC15A4	0.000210029	0.281497	SUCLG1							0.00013686	0.503437	ATN1	2.21107e-07	0.791654	TAB2
			0.00305851	0.326951	SH2B1							5.98456e-05	0.838566	AMN1							2.45733e-05	0.283425	PSMA4	2.14762e-11	0.807112	PGBD4	0.000240465	0.584043	SMIM15							0.000139271	0.667542	ERGIC2	2.28915e-07	0.786573	SLC31A2
			0.00310242	0.314824	PHC3							6.05546e-05	0.76202	CCT6P3							2.48033e-05	0.298521	RANBP3	2.16253e-11	2.02175	RFWD3	0.000244195	0.840962	UGDH							0.000143178	0.60214	RPL7L1	2.30297e-07	0.907733	TFEB
			0.00316815	0.348951	SCAF4							6.06387e-05	0.898527	PEX26							2.49047e-05	0.500659	BPGM	2.16301e-11	0.791438	PDCD6IPP2	0.000261737	0.77891	ADGRG5							0.000152596	0.263537	ZNF76	2.41138e-07	0.513278	LCP1
			0.00329936	0.404776	WDTC1							6.08462e-05	0.315546	TTLL3							2.52096e-05	0.273178	ADI1	2.25892e-11	2.27841	GOLGA2P5	0.000280094	0.606776	CHEK2							0.000158324	0.373022	HNRNPF	2.4953e-07	1.03361	PARP9
			0.00331533	0.293623	VAMP7							6.18915e-05	1.53817	FOXK1							2.53754e-05	0.287534	SFXN3	2.26907e-11	1.09931	ZC3HAV1	0.00028043	0.48356	UVSSA							0.00016343	0.640064	GPR34	2.49728e-07	0.59377	DNAJC13
			0.0033994	0.581309	COPS7A							6.34445e-05	1.13536	CCL28							2.59724e-05	0.381351	CUL1	2.27355e-11	1.43557	PNRC1	0.000293189	1.71116	LDLRAP1							0.000171372	0.790117	RRM1	2.49916e-07	1.31531	MTHFR
			0.00342533	0.370706	DHPS							6.36064e-05	0.897336	TRIM4							2.64353e-05	0.297389	STX10	2.31842e-11	0.39621	ZNF829	0.000301189	0.296672	ZFAND2A							0.000172825	0.25293	SNHG6	2.50981e-07	0.302142	IL6R
			0.00343051	0.407154	PTER							6.36554e-05	0.485751	FLOT1							2.75873e-05	0.410165	DNAJB12	2.44331e-11	0.416524	NFIB	0.000333061	1.80915	DBR1							0.000173225	0.610662	ABHD14B	2.53425e-07	0.403477	SLC25A40
			0.00344438	0.681287	BET1							6.43999e-05	0.414538	BTN3A1							2.88758e-05	0.561346	CENPM	2.50304e-11	1.27671	CTNNB1	0.000334609	3.34303	RGMA							0.000175474	1.75032	GSTM3	2.54775e-07	0.427326	MEF2D
			0.00344703	1.05421	PTGDS							6.53618e-05	1.0853	KIAA2026							2.9526e-05	0.788256	TRIB2	2.59432e-11	0.420796	LRP12	0.000335993	2.96669	BCAR3							0.00017647	0.926765	GZMA	2.56848e-07	0.677325	SNX29
			0.00345724	0.327825	PPID							6.75059e-05	0.636666	ARPIN							2.95669e-05	0.377405	FAM35A	2.60455e-11	3.20181	PLCE1	0.000337924	0.998404	HMG20B							0.000178525	0.566012	POC1B	2.58731e-07	1.06245	THRAP3
			0.00348468	0.525879	SIRT5							6.79933e-05	0.42076	TYW1							2.97869e-05	0.60995	PLPP1	2.68619e-11	1.19562	STAT5B	0.000343614	0.307643	MTX2							0.000182226	0.550383	ZNF33B	2.598e-07	0.414418	RPL23
			0.00350824	0.574102	NSL1							6.8107e-05	1.64288	STXBP5							2.98066e-05	0.546315	PHKB	2.74156e-11	1.70655	FAM13B	0.000368928	0.354064	ASMTL							0.000183862	0.317435	PDIA6	2.64675e-07	0.552009	OVCA2
			0.00353369	0.310838	VNN3							6.87724e-05	0.637656	IL17RA							3.26784e-05	0.290886	RFX7	2.80988e-11	1.13692	ZNF19	0.000378691	0.516288	ERO1A							0.000201096	0.732062	SCIN	2.65326e-07	0.65422	SPAG7
			0.00355466	0.416876	TXNDC9							6.88891e-05	0.647956	CLUHP3							3.46319e-05	0.296459	SHKBP1	2.81875e-11	1.21939	SNRNP200	0.000445421	0.917269	ZNF496							0.000204561	0.523453	XPO4	2.65443e-07	1.1605	EMB
			0.00357059	1.22693	RPTOR							6.89606e-05	0.49004	CHD3							3.54634e-05	0.332655	PSMC4	2.92856e-11	1.69636	CAPZB	0.000478861	0.48602	H3F3B							0.000204656	0.90396	STPG1	2.68123e-07	0.652292	SLC12A2
			0.00358162	0.477003	MAP7D1							6.91843e-05	0.608794	TMPO							3.60901e-05	0.559301	MIB1	2.98458e-11	1.37641	USP15	0.000489186	0.452007	CYP4V2							0.000211581	0.676221	CDK6	2.70835e-07	0.3829	ZDHHC4
			0.00359686	1.85183	ZFP14							7.06203e-05	0.599265	GGNBP2							3.74075e-05	0.431193	SNAP29	3.05262e-11	2.03506	ARHGAP4	0.000496365	0.469019	EIF4A3							0.00021411	0.3221	SUMF2	2.72564e-07	1.14199	NUBP1
			0.00360352	0.365673	KAT2B							7.10969e-05	1.52779	TBC1D8B							3.93553e-05	0.626051	CDK7	3.05327e-11	1.54683	IKZF1	0.00051574	0.679331	EHD1							0.000220292	0.432849	GPATCH4	2.77153e-07	0.377809	EIF3I
			0.00365625	1.51838	PPIAL4G							7.11708e-05	0.631532	OARD1							4.10174e-05	0.472565	ATP6V1A	3.12409e-11	3.78748	CEP295	0.000527726	0.637929	BMS1P4							0.000225225	0.759616	LETM2	2.79199e-07	0.877485	UBE2B
			0.00367149	0.264645	SUPT16H							7.12346e-05	2.14899	ZNF500							4.12711e-05	0.253788	VDAC2	3.32996e-11	0.40193	RPL35A	0.000536026	0.312975	ZNF720							0.000227632	0.400937	EHD4	2.91448e-07	0.434642	NDUFS8
			0.00371539	0.33449	PLEKHH3							7.25518e-05	1.36211	PTCD2							4.1779e-05	0.492225	DNASE2	3.47492e-11	1.14429	C3	0.000564531	1.17918	NXPE3							0.00023717	0.794488	TSPAN6	2.9225e-07	1.40349	SOS2
			0.00374941	0.361548	REST							7.43742e-05	1.12102	C9ORF3							4.35662e-05	0.440755	INSIG1	3.5e-11	1.84843	SLC4A8	0.000588226	0.613503	GPR108							0.000240909	1.04509	TTPAL	2.93828e-07	0.57299	ARPIN
			0.00383721	0.492184	MTRF1							7.54981e-05	0.818423	ALG11							4.4116e-05	0.550538	C5ORF64	3.61727e-11	0.915452	GPR85	0.000602744	1.71475	SATB2							0.000253117	0.337757	POLR1C	2.97258e-07	0.494531	ACTN1
			0.0038821	0.549938	BCKDHA							7.56977e-05	0.421142	RASSF3							4.42135e-05	2.25498	AKAP5	3.65087e-11	1.59522	LECT2	0.000623088	1.39677	LYZ							0.000259269	0.804405	PRR5	2.9818e-07	0.301692	TMEM230
			0.00392738	0.31912	FBXO9							7.67645e-05	0.501319	CAMK2G							4.52127e-05	0.376133	POP4	3.69758e-11	2.73472	ZBTB16	0.000649561	1.69668	SEC24C							0.000262844	0.577309	SECISBP2L	3.01423e-07	0.25141	LAMTOR2
			0.00396716	0.786539	ZNF844							7.76079e-05	1.5667	TCTN2							4.56657e-05	0.486695	LINC01089	3.80265e-11	1.03902	CD47	0.000657771	1.24999	MCM4							0.000284167	0.314562	NOP2	3.19372e-07	1.2078	SCYL3
			0.00401556	0.267103	FUCA2							7.78402e-05	0.726855	ZNF37A							4.94752e-05	0.824679	SLC25A19	3.98591e-11	1.36769	LRRC75A-AS1	0.000691902	0.585038	PKNOX1							0.00028591	0.782609	OSBP	3.25937e-07	0.377605	YARS
			0.00405822	0.43131	LTA4H							7.80175e-05	0.317007	RNF135							5.04129e-05	0.284005	PDCD5	4.08025e-11	0.852478	HLA-F	0.000718263	0.632338	NDC80							0.000290523	0.541225	CHD2	3.30256e-07	0.674931	DOCK2
			0.00416737	0.408912	CASP2							7.89226e-05	0.962508	DPH1							5.68894e-05	0.416398	LINC00937	4.09357e-11	1.29444	YWHAB	0.000771923	0.588817	MMACHC							0.000302132	0.610621	SMURF1	3.32942e-07	0.842214	TRIM14
			0.00417749	0.479338	DHRS1							8.05323e-05	1.24881	RPAP1							5.70627e-05	0.351792	SRP19	4.20445e-11	1.63097	KRR1	0.000851133	2.02106	RGS3							0.000319803	0.935339	CSTF1	3.37651e-07	1.01419	EIF6
			0.00418034	0.901802	ATP5G1							8.08894e-05	1.52818	TMEM80							5.70734e-05	0.42068	GOLT1B	4.2194e-11	1.47539	TMEM159	0.000851662	0.664177	CCDC80							0.000337731	0.45771	ATP2A2	3.38425e-07	0.458198	ANXA11
			0.00421293	0.289491	GPD1L							8.16459e-05	1.03338	TAMM41							5.79404e-05	0.290681	MRPL15	4.37082e-11	0.638152	TRAPPC2L	0.000874869	1.01889	RFK							0.000344579	1.58344	FCRL2	3.40743e-07	1.00325	ODF3B
			0.00423016	0.65349	GNPDA2							8.17335e-05	0.734846	RGL2							5.99515e-05	0.532671	CCDC6	4.426e-11	0.742823	CDKL5	0.000875724	0.299944	FAM193A							0.000369472	0.360309	EIF3I	3.40848e-07	1.77165	ZRSR2
			0.00424691	0.293193	CCDC18-AS1							8.18697e-05	0.668991	NCBP2-AS2							6.50141e-05	0.541675	LRRFIP2	4.44669e-11	2.10453	LCOR	0.000901492	0.354784	GNL1							0.000376977	0.256547	NUCB2	3.4094e-07	0.259274	SGTA
			0.00425081	0.78347	CHRNB1							8.20445e-05	0.717097	ARRDC3							6.87086e-05	0.553284	CCDC69	4.52602e-11	0.428668	SLC35E3	0.000928063	0.58584	GZMA							0.000385902	0.266322	CLDND1	3.46165e-07	1.05507	UBA3
			0.00445948	0.377438	ZNF655							8.23838e-05	0.44401	PDCD7							6.93152e-05	0.37757	CASP8	4.61487e-11	0.920935	FMNL1	0.000964141	0.518428	DNASE2							0.000399976	0.526181	DYNC2LI1	3.60618e-07	0.29782	ATPIF1
			0.00453339	0.298654	EIF3F							8.25096e-05	0.573289	KIAA0391							6.95165e-05	0.742248	EOGT	4.67293e-11	1.359	MIS18BP1	0.000993852	1.18657	PANK3							0.000406317	0.302493	AASDHPPT	3.62148e-07	0.305424	LUZP1
			0.00460272	0.81836	TTLL3							8.30825e-05	0.841968	UBASH3A							7.16115e-05	0.433071	R3HCC1	4.76872e-11	0.931389	TPSAB1	0.00101039	0.347308	LTBR							0.000407522	0.561667	NABP1	3.64973e-07	0.748202	GLG1
			0.00470228	0.44668	TRMT10B							8.36172e-05	0.65219	UBXN1							7.35904e-05	0.945823	ABI2	4.85752e-11	1.79494	USP6NL	0.00105422	1.18156	ALAS1							0.000408934	0.428227	TRDMT1	3.67095e-07	0.561551	GPR108
			0.00471815	0.667546	DIS3L							8.41457e-05	0.950344	STPG1							7.36159e-05	0.306289	RBM18	4.98323e-11	0.871424	TRPM4	0.00106157	0.423227	HSPE1							0.000410691	0.595959	OGFOD1	3.71469e-07	0.271814	FAH
			0.00479252	0.315652	STX18							8.53847e-05	0.769113	TRIM27							8.21921e-05	0.512284	MRPS16	5.14875e-11	0.698958	ATG16L2	0.00108344	0.300435	SLC30A5							0.000413378	0.52178	TMX1	3.90296e-07	2.88542	KIF13A
			0.00482122	0.420893	HLA-DOA							8.82764e-05	1.35215	ANKS3							8.24176e-05	0.350074	C3ORF38	5.17077e-11	0.618272	CALM1	0.00108872	0.78807	SUSD6							0.000421566	1.35161	SOGA1	4.0901e-07	0.489128	ACTN4
			0.0048456	0.371062	UBE2E3							8.99817e-05	0.795575	GLOD4							8.24943e-05	0.777763	ZBP1	5.28116e-11	0.995861	SF3B1	0.00110751	0.404008	MED13L							0.000421688	0.975936	ACKR2	4.12773e-07	0.396042	FSIP2
			0.00485949	0.496879	SLC43A2							9.03694e-05	0.684519	LRIG1							8.35261e-05	0.41047	SNAP23	5.36277e-11	1.38283	STK26	0.00114253	1.50799	TVP23C							0.000429134	0.46954	INO80C	4.27757e-07	0.913762	SEC62
			0.00491452	0.441927	NUDT6							9.07061e-05	1.66394	ZNF674-AS1							8.74227e-05	0.399581	CCDC88C	5.36926e-11	1.67239	DPF2	0.00117671	0.532648	AFMID							0.00042938	0.571025	MEG3	4.31829e-07	0.727273	CALHM2
			0.00495122	0.334866	DDX60							9.08001e-05	0.501491	SRSF10							9.05476e-05	0.254196	MYO5A	5.39175e-11	2.25532	COLEC12	0.00119309	0.638698	CCDC88C							0.000454327	0.555036	EBP	4.47369e-07	0.381948	DCTN4
			0.00495632	0.858474	TTC5							9.22983e-05	0.29687	ZNF831							9.3641e-05	0.814478	GPHN	5.48236e-11	2.10082	ZNF200	0.00119363	0.255247	MPV17							0.000460964	0.47451	ELAC2	4.59329e-07	0.418183	KBTBD2
			0.0049726	0.254518	PRICKLE2							9.44335e-05	1.27478	C12ORF76							9.64953e-05	0.356948	UBR5	5.49044e-11	0.254674	NUBPL	0.00119959	0.459092	ATP6AP2							0.000461559	0.922633	ZNF660	4.60743e-07	1.35668	USF1
			0.00497294	0.356273	FAM96A							9.59329e-05	0.969906	ZNF587							0.000103487	0.283227	DDX19B	5.59445e-11	2.38076	EFTUD2	0.00120898	1.72899	PCTP							0.000466629	0.480841	CCDC9	4.65882e-07	0.564614	DESI2
			0.00498431	0.492921	JAGN1							9.65056e-05	0.578968	C19ORF25							0.000103963	0.600286	PGM2L1	5.64622e-11	2.48202	CCDC171	0.00124045	0.470142	TRIM41							0.00048724	0.345369	PBDC1	4.66814e-07	0.441712	FIS1
			0.00499816	0.740445	GLT8D1							9.71881e-05	0.560286	EIF2B1							0.000104855	0.498976	DUSP11	5.68055e-11	1.41441	LRCH1	0.00125362	0.425822	KIF1B							0.00050606	0.519623	IFI44L	4.67739e-07	1.10573	STARD8
			0.00504028	0.411436	WHAMMP2							9.76169e-05	1.46456	WDR73							0.000105767	0.260351	FAM49B	5.7793e-11	0.643436	RPL24	0.00128588	1.19355	TCEANC							0.000510915	0.740987	HACD3	4.69669e-07	1.23087	CBWD3
			0.00510073	0.325728	UGCG							9.79158e-05	1.09589	LINC00909							0.00010609	0.625	TRAF3IP2	6.0942e-11	1.48288	RASGEF1B	0.00130627	0.758613	TMEM259							0.000524411	0.435917	CD320	4.7991e-07	0.676409	RPS19BP1
			0.00513268	0.377276	FOXRED1							9.86733e-05	1.17681	DCAKD							0.000110898	1.14712	MOB1B	6.11543e-11	3.54588	MAP7D3	0.00135359	1.22409	ACSM2A							0.000549862	0.265393	IL18	4.91573e-07	0.41647	NONO
			0.00513555	0.280569	WDR61							9.94527e-05	0.292339	ZNF107							0.000112051	0.262926	MDH1	6.11561e-11	1.93634	HAUS8	0.00137024	0.635161	NUDT22							0.000556952	0.799968	ASB8	4.95135e-07	1.14224	CAPN10
			0.00516945	0.378996	IER3IP1							0.000100178	0.914155	ULK3							0.000112735	0.291054	UQCRC1	6.20099e-11	5.1635	RASAL3	0.00142218	0.492148	IRF3							0.000567956	0.490688	GHDC	4.97515e-07	1.37957	ORC2
			0.00524179	1.13278	NEK5							0.000101705	0.76152	IL6R							0.000113276	0.305084	RPP21	6.45574e-11	1.61848	RIT1	0.00150877	0.340615	ALG14							0.000582538	0.812935	PA2G4	5.09127e-07	0.411302	ATRAID
			0.00530165	0.352871	AP1S2							0.000102621	0.381357	MTMR4							0.000114499	0.354116	MPV17	6.62922e-11	1.29052	BDP1	0.00152942	0.702764	KLF6							0.000600925	0.364017	PDIA4	5.09255e-07	1.56297	BTN3A1
			0.00544159	0.584312	EXOSC8							0.000103447	1.31912	CACNA1A							0.000115108	0.301615	UBL7	6.65977e-11	2.65801	PPP1CB	0.00157889	1.74614	LPIN3							0.000606222	0.51469	CCNT1	5.09929e-07	0.442841	C4ORF32
			0.0054515	0.483686	ZNF37BP							0.000106433	0.475891	2022-03-06							0.000122342	0.374063	POLR3K	6.67418e-11	4.17535	TNR	0.00161869	6.17896	DNAAF1							0.000612052	0.46643	ZNF654	5.16295e-07	1.14827	TTC7A
			0.00546406	0.366259	MED16							0.000106816	0.90854	JADE1							0.000126453	0.318786	ZSWIM8	6.76804e-11	2.0604	DENND3	0.00171003	0.622844	OGDH							0.00061542	0.353359	PSMF1	5.23531e-07	0.484793	SLBP
			0.00547446	0.335344	RPRD2							0.000109273	0.712359	FBXO22							0.00013234	0.286714	VMA21	6.79232e-11	0.264891	TOMM7	0.00171693	0.297244	POLD2							0.000628745	0.261398	NDUFA5	5.44546e-07	0.477328	SH3YL1
			0.00547625	0.605424	GATAD1							0.000111119	2.97042	ZNF253							0.000134018	1.04575	B3GNT5	6.79433e-11	1.45463	LINC00547	0.00175951	0.302531	FDX1							0.000656227	0.512798	SLC29A1	5.46177e-07	0.596896	CUEDC2
			0.00548477	0.402994	CLMN							0.000112243	0.344812	ADAM32							0.000135012	0.375245	ZNF548	6.86313e-11	1.22063	PGM2L1	0.00180539	3.12446	GPRIN3							0.000664758	0.38729	TTC7B	5.49372e-07	0.340485	NDUFV1
			0.00552589	0.455661	NCAPD3							0.000112267	0.424721	TMEM41B							0.000137135	0.260687	CARHSP1	7.03873e-11	0.940967	RSRP1	0.00184784	0.512886	ZNF839							0.000671801	0.310043	FYTTD1	5.51629e-07	0.418608	RPL6
			0.00555734	0.336789	GLE1							0.000112433	0.320917	ACYP2							0.000137142	0.487415	RRN3P2	7.06773e-11	2.10898	PHF11	0.00184889	0.742506	HSPA8							0.00070309	0.56815	TBRG4	5.5589e-07	0.260304	C5ORF15
			0.00559781	0.366497	ENOPH1							0.000112859	0.813582	NOB1							0.00013944	0.603485	CPSF3	7.24216e-11	0.447845	CCDC170	0.00192909	1.41224	TTC8							0.000714608	0.404635	ELK4	5.6579e-07	0.809461	SNRPE
			0.00568352	0.592585	TMEM192							0.000113425	0.633951	ATF7IP2							0.000147479	0.996419	CMSS1	7.31318e-11	1.63804	ABI1	0.00193016	0.336204	AKTIP							0.000750069	0.638779	ZNF250	5.71219e-07	2.17867	NRROS
			0.00568457	1.07803	TPK1							0.000114077	0.491827	CNOT8							0.000151988	0.250646	PSMD9	7.59587e-11	1.3425	TFAP4	0.00198065	0.677996	MRPL52							0.000764674	0.403827	C11ORF24	5.72236e-07	1.99453	KCNC4
			0.00580106	0.505839	MYH11							0.000116049	0.421791	ZNF716							0.000154229	0.321856	SNRPE	7.71132e-11	1.89549	MTF2	0.00202603	0.574902	STAT1							0.000786844	0.560283	NIP7	5.76665e-07	0.463396	CLPTM1
			0.00595069	0.405551	ADI1							0.000116684	0.665058	SNRK							0.00016474	0.364907	TMEM242	7.75696e-11	2.5325	GALNT10	0.00205495	1.52001	MAP7D1							0.000798897	0.465402	ZNF274	5.77406e-07	0.302252	TROVE2
			0.00596429	0.368801	MRPS27							0.000117394	2.34252	DENND2C							0.000167784	0.436298	OXSR1	7.81555e-11	1.79192	TAOK3	0.00206293	1.43992	MIEF1							0.000821423	0.269407	EIF5A2	6.17594e-07	0.705291	TMPO
			0.00604938	0.267607	SPRYD4							0.000117869	1.23382	NEIL1							0.000168723	0.384252	LINC01578	7.93533e-11	0.700266	POLR1A	0.00219913	1.85428	PLLP							0.000825672	0.631396	NFS1	6.23329e-07	0.656761	CHCHD1
			0.00605208	0.261574	POLR2G							0.000117933	0.569548	EXOSC8							0.000169862	0.293596	GPS1	8.23312e-11	1.21878	SMAGP	0.00226393	3.70177	SPON2							0.000835115	0.403634	F11R	6.25455e-07	0.89128	SUPT6H
			0.00609828	0.697509	MED11							0.000118253	0.524651	LRRC37A							0.000171192	0.318336	COMMD1	8.39605e-11	0.97221	CDC42SE2	0.0022772	0.397601	GSKIP							0.000839686	0.588254	ZNF562	6.36904e-07	0.965464	TMEM248
			0.00609851	0.259324	PCDH11X							0.000118337	1.01859	DDX55							0.000175016	0.260209	SAMD8	8.87264e-11	2.50139	FLVCR1	0.00237908	0.394714	TMCO3							0.000860901	0.250691	SMURF2	6.44399e-07	0.491268	RAB5C
			0.00616724	0.868499	ZNF737							0.000120528	0.368231	CYTH1							0.000179751	0.259053	TBC1D10B	9.21361e-11	1.36115	CDC42SE1	0.00238699	0.381893	NPAT							0.000864062	0.466002	TTC31	6.46005e-07	0.5813	ABHD6
			0.00623459	0.333022	GTF2H5							0.000122651	0.402901	STEAP4							0.000180478	0.255518	POLR2E	9.24249e-11	1.30867	AP1G2	0.00245086	0.272928	TCF3							0.000918518	0.7531	TSPAN31	6.52352e-07	1.0709	ZADH2
			0.00626971	0.396226	NSF							0.000123561	1.18625	ZNF136							0.000184538	0.49304	TXNRD1	9.34971e-11	0.326697	PPARA	0.0025178	0.817722	POLN							0.000937099	0.489023	RTCB	6.56547e-07	0.796554	ATXN7L1
			0.00629272	0.572974	DDX19B							0.000124101	0.567649	MTAP							0.000187674	0.306509	UQCRC2	9.37311e-11	1.47361	SRFBP1	0.00257247	1.60761	EPCAM							0.000958057	1.28974	RBBP9	6.68785e-07	1.21267	USP24
			0.00631892	0.388908	PRPSAP2							0.000125166	0.743523	THUMPD1							0.00019619	0.299635	UBL3	9.4164e-11	4.68613	MPEG1	0.00260777	1.68061	CFL2							0.000969728	0.452987	CYB561	7.04235e-07	0.589649	NUCB1
			0.00632592	0.660724	RAD9B							0.000125339	2.51765	MYLK							0.000208603	0.262181	ATG3	9.44719e-11	3.07653	C9ORF72	0.00269831	1.7149	C12ORF77							0.000972259	0.59844	SNHG1	7.22839e-07	0.719492	IRF5
			0.00635494	0.585813	PTRHD1							0.000125481	0.55678	SLC39A10							0.000209659	1.6219	SAMD12	9.47598e-11	1.28393	SCAF11	0.00278755	0.737462	TMEM245							0.000985873	0.474231	FGFR1OP2	7.23716e-07	0.785681	VAMP5
			0.00644756	0.311118	PDCD6IPP2							0.000127954	0.676409	MED15							0.000213998	0.641347	LETM1	9.51676e-11	0.337465	TPD52L1	0.00282987	1.00128	SKA1							0.000997359	0.560659	CRIPT	7.61249e-07	0.511513	SLC34A2
			0.00646889	0.525857	RNF14							0.000128378	0.59605	YIPF4							0.000215269	0.564142	MRPL27	9.75945e-11	1.56873	ABO	0.00288578	0.262371	PSMD3							0.00102643	0.744742	MLLT3	7.6135e-07	0.451489	DET1
			0.0065135	0.488819	BRCA2							0.000131849	1.17453	MRPL46							0.000216601	0.474435	BID	1.02933e-10	0.681905	ITGB1	0.00289342	1.23179	NDRG1							0.00104328	0.388049	UBE2L6	7.959e-07	0.40518	MYEF2
			0.00651475	0.482499	TMEM261							0.000132036	1.10601	MOCS3							0.000221243	0.300687	PEX2	1.11829e-10	1.48498	SPDYE5	0.0031168	0.331429	CMC1							0.00108809	0.336558	PLAG1	8.14918e-07	0.567985	RNASET2
			0.00657384	0.3429	PTK7							0.000132174	0.862268	FAM217B							0.000223068	0.28682	DNAAF2	1.13559e-10	0.329247	ATP1B2	0.00326386	1.10611	CHRNB1							0.00112305	0.280468	RBBP7	8.15934e-07	0.587452	PPP1R21
			0.00663463	0.337105	MTFR1L							0.00013267	0.860805	PPIE							0.000223627	0.26285	TUBA1B	1.15366e-10	0.664947	TCAF2	0.00357363	0.306937	ACAA2							0.00115031	0.251074	JOSD1	8.16792e-07	0.376982	CNST
			0.00664129	0.599081	TSEN34							0.000133287	0.844028	PDE7A							0.000230601	0.44389	RAB11A	1.15786e-10	2.24509	ARHGEF26	0.00359979	0.893277	PHACTR4							0.00115064	1.82626	TGFB1I1	8.24626e-07	0.599674	SLC22A18
			0.00664834	0.509679	WDFY1							0.000136036	0.458091	LINC00471							0.000234829	0.43498	BECN1	1.17088e-10	1.26875	C6ORF48	0.00395713	1.41527	CXCL2							0.00121532	0.306865	LIX1L	8.39914e-07	1.78871	LRRC8D
			0.00666068	0.260531	MAN1A2							0.000136151	0.412583	COX4I1							0.000235789	0.305934	PROSC	1.17727e-10	1.7572	CAPG	0.00407338	0.328051	CRIP1							0.00123115	0.376951	AAMDC	8.42812e-07	0.269753	THUMPD3
			0.00667714	0.584045	HLA-J							0.000137663	0.831453	LRRC37A2							0.000236894	0.321042	PPM1A	1.19086e-10	0.988278	TMEM260	0.00408526	1.37864	ZADH2							0.00124018	1.08946	METTL14	8.45815e-07	0.339743	NUTF2
			0.00671762	0.580669	ACYP2							0.000137911	0.590602	PHF3							0.000243881	0.271317	MRPL36	1.19633e-10	1.66602	ATM	0.00448505	0.602053	ST6GAL1							0.00135143	0.526981	SMIM11A	8.47536e-07	0.572285	OSBPL3
			0.00676143	0.335743	AIFM1							0.000138104	1.11406	LINC00891							0.000246203	0.276312	LINC00957	1.23691e-10	2.0646	CWF19L2	0.0044993	0.522994	DCAF4							0.00139235	0.638363	FMNL2	8.50538e-07	0.823885	PLD1
			0.00685665	0.8464	TMEM260							0.000139662	0.444147	SENP6							0.000246786	0.360089	STAT1	1.23792e-10	1.2185	SMYD4	0.00467928	0.41232	AEN							0.00139504	0.847361	PPM1K	8.62956e-07	0.333814	RRM1
			0.00686663	0.445614	TRAFD1							0.000140586	1.74786	SLC27A5							0.000266163	0.411148	AP1S2	1.25358e-10	0.825369	ZSCAN18	0.00475727	1.08459	MED18							0.00142193	0.334467	FAM221A	8.77612e-07	0.497492	CTDSP2
			0.00687329	0.26793	TTC34							0.000141596	2.37531	ZNF780B							0.000267309	0.544514	UHRF2	1.25859e-10	1.44205	SFI1	0.00522064	0.278222	CHCHD2							0.00143507	0.425377	ANKRD36B	8.87408e-07	0.412411	SLC2A8
			0.0068949	0.327986	TSEN15							0.000145759	0.577312	VPS29							0.000278337	0.332742	PRKCD	1.26913e-10	1.19274	STAG3L2	0.00523283	0.897704	ACO1							0.00145925	0.348654	RANBP1	8.90701e-07	0.983098	TEP1
			0.007034	0.567578	IMPDH1							0.000146622	1.46971	C1ORF140							0.000278577	0.452904	MAML1	1.27251e-10	1.10956	ZPR1	0.00530166	0.257806	SGTA							0.00148913	0.649323	IFIT3	8.95015e-07	0.895261	STX16
			0.00720844	0.495521	AP5M1							0.000146901	1.23103	AMMECR1							0.000285578	1.33211	KIF1B	1.34238e-10	0.771659	CAMK2G	0.00530587	0.342264	FUT8							0.0015053	2.33913	RGS17	9.08722e-07	0.719143	SHISA5
			0.00721068	1.11804	MARVELD3							0.00014731	1.37237	FUK							0.000287545	0.312777	UQCRFS1	1.35837e-10	2.72042	EFCAB13	0.00532051	2.13001	MYLK							0.00150907	0.694909	GNS	9.28655e-07	1.63243	AGFG1
			0.00722321	0.467435	PPIE							0.000147521	0.755219	BLOC1S5							0.000290604	0.323075	ARF3	1.362e-10	1.71995	MOCS3	0.00539003	0.453693	DCTN2							0.00155728	0.417163	PLPP5	9.54528e-07	0.504646	MRPS12
			0.00758446	0.543241	ARHGAP4							0.000148624	0.304605	SLFN12L							0.000312299	0.379574	LEMD3	1.39029e-10	1.79703	IDI1	0.0055277	0.302655	CAPN2							0.00157375	0.388685	PTPN18	1.01203e-06	0.460527	RPS11
			0.00759134	1.14213	ZC3H4							0.000151853	0.666369	EBPL							0.000316494	0.585556	LXN	1.44557e-10	0.456698	RPS15A	0.00566445	2.39857	FAM114A1							0.00170458	0.451716	PSMG1	1.04772e-06	0.88396	ZNF385A
			0.00772731	0.806884	LAIR1							0.000152835	1.41951	TRAPPC11							0.000318589	0.597108	PLEKHM1	1.4489e-10	0.506544	SLITRK2	0.00574058	0.938615	PIGX							0.00180162	0.575471	PRPS2	1.064e-06	0.43198	RAB8B
			0.00785017	0.423794	MIEF1							0.000153588	0.995666	ZKSCAN1							0.000326408	0.301516	LAMTOR1	1.45372e-10	1.15228	CERS4	0.0057513	0.282025	IER2							0.0018076	0.453668	MRPL10	1.08782e-06	0.746702	NBAS
			0.00818922	0.370539	NUBP2							0.000154256	0.712884	PUM3							0.000328168	0.28655	SRGAP2	1.4561e-10	2.096	SNX8	0.00620113	0.629025	IL10RB							0.00183729	0.287591	SERGEF	1.09224e-06	0.748929	MAPK8IP3
			0.00829765	0.340291	RAD9A							0.000157231	0.671032	FAM208A							0.000330021	0.354554	CUEDC2	1.45838e-10	0.880532	ZNF44	0.00621595	0.789814	EP400NL							0.00183826	0.403447	ZNF835	1.09805e-06	1.34238	RNPEPL1
			0.00841906	0.263143	MAN1B1							0.000157246	0.377626	GTF2IRD2							0.000331053	0.284357	LAMP2	1.48578e-10	2.43116	DOCK11	0.00622458	0.918914	LINC00550							0.00184271	0.38492	PHLDA1	1.10688e-06	0.918022	SCN3B
			0.00845281	0.37132	DNAJC19							0.000157908	0.442988	FUBP1							0.000331094	0.540718	HAUS1	1.50586e-10	1.53806	PHKB	0.00644812	0.287953	EMC1							0.0018916	0.593119	ZNF667	1.11905e-06	0.366234	ARCN1
			0.00858189	0.663677	SWSAP1							0.000158958	0.420777	TRAPPC12							0.000335467	0.45999	CARS	1.50998e-10	2.14254	HS3ST1	0.00682596	0.609775	PIGR							0.00199796	0.567314	SLC30A2	1.11963e-06	1.19154	NEMF
			0.00865754	0.467813	STIM1							0.000158958	1.07401	CRTC1							0.000339579	0.517483	FAM69A	1.53236e-10	0.899563	SMCHD1	0.00712216	0.260234	NUDT4							0.00207876	0.397903	DCAF7	1.12105e-06	1.52222	PNPLA2
			0.00867417	0.575208	GMIP							0.000159002	1.12378	TCEANC2							0.000342296	0.289494	ASXL2	1.55419e-10	1.2939	ZNF487	0.00766825	4.45138	TNFAIP2							0.00208056	1.48367	PDE6B	1.1221e-06	0.660911	NDUFV2
			0.00868884	0.279712	VRK3							0.000160039	1.23513	PCSK6							0.000346443	0.306144	RSU1	1.56292e-10	1.18454	CHRNA7	0.00778078	1.21724	MUC20							0.00208645	0.522781	VAMP7	1.134e-06	0.660426	TMED4
			0.00870912	0.388644	APOA2							0.000161778	0.263867	PLCD4							0.000350272	0.256755	FDX1	1.60987e-10	1.69209	NR4A2	0.00794263	0.537081	SLA							0.00214539	0.654757	ACYP2	1.15733e-06	0.352468	USP38
			0.00874087	0.440387	COG6							0.000162342	0.489137	NFATC3							0.000360022	0.282315	STX8	1.61803e-10	1.75905	HDAC1	0.0081854	0.403234	GALK2							0.00218834	0.872329	PRKY	1.18133e-06	0.670499	IFI27L2
			0.00886978	0.316516	CERKL							0.000165059	0.405791	VGLL3							0.000374183	0.690653	CALCOCO1	1.62058e-10	1.24132	MYO1G	0.00826917	0.944306	CEP78							0.00226646	0.596787	SHMT2	1.18404e-06	0.732784	ERC1
			0.00905993	0.750237	ZBTB8A							0.000166864	0.736237	TTC9C							0.000374816	0.305568	MAD2L2	1.65779e-10	2.97702	ITGAX	0.00844612	0.481167	TSC22D2							0.00228977	0.271749	RUVBL1	1.20508e-06	1.3132	KLHL2
			0.00908765	0.682075	ZBTB16							0.000168143	0.323168	PRKACB							0.000391029	0.384929	NDUFB5	1.6615e-10	1.29182	H6PD	0.0084656	0.981487	DTWD1							0.00233131	0.307798	FAM122C	1.22768e-06	1.33664	APAF1
			0.00918494	0.610414	SNAPC5							0.000170299	1.32161	DRAM2							0.000402488	0.482415	TOLLIP	1.6633e-10	1.09948	ARL6IP1	0.00848234	1.43371	RPS6KL1							0.00233657	0.362674	POGZ	1.23299e-06	0.787471	AP5S1
			0.00935456	0.280354	RBM6							0.000170733	0.624772	SSU72							0.000404173	0.268223	SPATS2	1.68083e-10	2.13833	SSBP2	0.00856224	1.03523	CDC20B							0.00238991	0.251426	C15ORF57	1.26602e-06	0.398166	CLNS1A
			0.00970044	0.54401	DYNC1I2							0.000175138	0.638385	DPYD							0.000405644	0.294782	UBE2H	1.69261e-10	0.79936	ABHD18	0.00909398	0.420081	TSC2							0.00240018	0.321515	OSTC	1.28254e-06	0.415989	TMEM258
			0.00973483	0.426465	RUVBL1							0.000175659	1.02083	FBXO32							0.000411972	0.660687	CSNK2A1	1.72023e-10	0.260064	CCDC169	0.00914994	0.266467	CRACR2B							0.0024247	0.933606	CABYR	1.28268e-06	0.394638	MAGT1
			0.00977263	0.47993	POLL							0.000177681	0.606469	TECR							0.00042873	0.632289	MKNK2	1.75113e-10	0.562136	SLC7A1	0.00924112	1.32521	SLA2							0.00243434	0.411768	CWC22	1.30265e-06	0.409269	TMEM50A
			0.00977859	0.280491	ITPA							0.000179961	0.37973	IMP3							0.000434101	0.295048	TXLNA	1.91395e-10	1.36051	SLC7A14										0.00245973	0.765544	GALNT11	1.34221e-06	0.657682	PDZD8
			0.00978079	0.38038	ATP8B3							0.000184501	0.260685	TMC6							0.000449285	0.456301	SIPA1L1	2.00795e-10	1.63268	ATXN2										0.00246017	0.355283	RCHY1	1.3773e-06	0.371604	RSU1
			0.0098286	0.324588	CNPPD1							0.000187167	0.764095	NOA1							0.000469007	0.330349	FDFT1	2.01206e-10	0.933194	BOD1L1										0.00246424	0.455589	CFAP70	1.42163e-06	0.501786	ETHE1
			0.00992756	0.516102	DHRS7B							0.000187493	0.511527	LINC01091							0.000473404	0.360138	MICAL3	2.01456e-10	3.02329	C10ORF128										0.00256041	0.762161	RAE1	1.43028e-06	0.372931	IL1RAP
			0.0099817	0.909775	ZNF333							0.000192695	0.537491	SGSH							0.000479265	0.384684	PDZD11	2.02415e-10	0.757702	NKTR										0.00265157	0.554713	STXBP4	1.46057e-06	1.19951	ARID1A
												0.000194935	0.867688	SIMC1							0.000489838	0.793079	FBXW11	2.02713e-10	1.76417	NR3C1										0.00265786	0.390425	NSUN6	1.47395e-06	1.66681	SPATA6
												0.00019683	1.01079	ESF1							0.000523494	0.832476	ARAP1	2.04585e-10	1.77259	ST8SIA1										0.00272141	0.869022	RNF152	1.49001e-06	0.322307	ATP5O
												0.000203638	0.529342	MTERF4							0.000529471	0.392088	RPUSD3	2.04917e-10	0.545641	EIF2A										0.00280436	0.366627	GPR89A	1.49448e-06	0.968061	C20ORF24
												0.000204886	1.16167	BCKDHB							0.000531735	0.549495	GALK1	2.08779e-10	1.61723	ZNF440										0.00281614	0.307737	CYB5A	1.51492e-06	0.366394	UFC1
												0.000205408	0.49733	ATXN7L1							0.000539301	2.12216	TWIST1	2.12196e-10	2.1452	ITGA1										0.00285312	0.313712	TAMM41	1.53105e-06	0.372297	MED14
												0.000205487	0.71483	XRRA1							0.000545154	0.407479	FAM134C	2.12996e-10	1.43635	FRG1HP										0.00286927	0.314953	HUS1	1.54859e-06	0.76169	OGT
												0.00020564	0.848801	LTA4H							0.000562401	0.296206	TMBIM6	2.22351e-10	2.62218	RNF111										0.00295126	0.335921	YTHDC1	1.59279e-06	1.01757	HACD4
												0.000206736	1.21972	IFT172							0.000564978	2.14954	LRG1	2.22578e-10	1.21688	MYEF2										0.00300224	0.716804	DDA1	1.63142e-06	0.426375	SELPLG
												0.0002069	0.909812	MRPS25							0.000583391	0.920208	MIR181A1HG	2.24147e-10	0.295629	GALNT6										0.00304621	0.574975	TRAPPC2	1.64947e-06	0.692913	SLC17A7
												0.000207892	0.312936	CD3G							0.000585362	0.665977	STAM2	2.28804e-10	0.718601	SIM2										0.00312988	0.329242	CSNK2A1	1.65003e-06	1.01183	NUP210
												0.000208425	0.504702	SNRNP35							0.000588406	0.266314	RPA1	2.3162e-10	2.07693	FLNA										0.00316333	0.26027	WDR48	1.67476e-06	0.328428	UROD
												0.000211819	0.733336	SLC35C2							0.000595468	0.396399	SUCLA2	2.31921e-10	2.04359	PTBP3										0.00318178	0.315442	PSMC4	1.67605e-06	0.332209	DDA1
												0.000212929	1.01972	CRTC3							0.000603821	0.491162	SARNP	2.33025e-10	0.391444	RPARP-AS1										0.00320829	0.332991	HAUS6	1.69378e-06	1.12154	SRP54
												0.000216496	0.733268	CHRNB1							0.000604306	0.475017	LINC00891	2.35238e-10	1.41038	MITD1										0.00330662	0.299374	CLCC1	1.69652e-06	0.336332	CCDC127
												0.00021755	1.13325	TCEANC							0.000608217	0.268242	CASP2	2.37315e-10	2.24778	ZNF18										0.0034098	1.45941	KLRK1	1.70953e-06	0.696873	AIFM1
												0.000219317	1.83244	PI4KAP2							0.000622847	0.397227	FUT8	2.39708e-10	0.368893	DGKD										0.00342592	0.451199	NRIP1	1.71377e-06	0.66637	MAPKAPK3
												0.000226063	1.01354	FARSB							0.000640606	0.316901	ALDH9A1	2.49076e-10	1.36692	CHD2										0.00345421	0.8166	TYRO3	1.72655e-06	0.649636	NDUFS4
												0.00022911	1.3987	ERICH1							0.000645636	0.314588	C2ORF91	2.60009e-10	0.421141	WDR62										0.00347763	0.254363	SFXN1	1.73164e-06	0.693052	LUC7L
												0.000230136	0.913322	ZNF8							0.000655849	0.299876	ING3	2.66905e-10	1.45644	EPB41										0.00359607	0.415719	SLAIN2	1.74484e-06	1.01995	CARMN
												0.000231104	0.854229	JAK3							0.00068068	0.523084	NCOA2	2.70263e-10	0.990914	TMOD3										0.00361783	0.335501	COPS4	1.78199e-06	1.0823	BAZ2A
												0.000232872	1.76207	USP32P1							0.000683715	0.46093	ZNF143	2.74701e-10	0.480233	SRSF7										0.00367723	0.396886	LSM14A	1.78204e-06	0.507525	MTCH2
												0.000233786	0.684512	PUS7L							0.000685586	0.366508	CNPPD1	2.78179e-10	1.36468	SUMO2										0.00377763	0.318598	DIABLO	1.80334e-06	0.275966	SLC25A32
												0.000236939	0.335523	NFRKB							0.000709409	0.293457	PCNA	2.79233e-10	1.6299	HIP1R										0.00380738	0.625425	SMAP1	1.8093e-06	0.580227	SDE2
												0.000238777	0.55081	IRF3							0.000711274	0.310501	LAMA4	2.83305e-10	1.85542	RBMS1										0.00402052	0.836956	ZNF708	1.84284e-06	0.61448	DNAH2
												0.000238976	0.682952	BET1L							0.000729135	1.16124	EHMT1	2.84222e-10	0.418802	MROH7										0.00408541	0.937465	NMUR1	1.93878e-06	0.768104	BAD
												0.000239563	1.58806	STK33							0.000732355	0.279298	MRPL22	2.84792e-10	0.973494	NBPF3										0.0042225	0.338869	DPY19L4	1.96602e-06	0.463682	PTPRM
												0.000244265	0.790337	CAPN7							0.000734665	0.608897	TRIM25	2.86754e-10	0.807339	HMGB1										0.00430991	0.310698	RNF4	1.97644e-06	0.605692	NR3C1
												0.000245865	1.9571	GABRG2							0.000740359	0.443464	TTF2	2.87187e-10	2.02631	ZNF286B										0.00447059	1.15002	DNAJC18	2.0137e-06	0.254989	GABPB1
												0.000248351	0.840036	PREPL							0.000750375	1.58956	DGKE	2.96663e-10	1.36252	SKIL										0.00453456	0.570578	FAM213A	2.03696e-06	1.26804	PHIP
												0.00024933	0.455637	TUBGCP4							0.000752036	0.441156	TUBB	3.10042e-10	1.92387	KLRK1										0.00455599	0.256629	PEX2	2.03815e-06	0.324878	AASDHPPT
												0.000249707	0.383156	NEMF							0.00075843	0.347612	APOL2	3.24087e-10	0.452769	COPA										0.00466498	0.438701	PRKCSH	2.04247e-06	0.715321	DOK2
												0.000251701	0.616361	EIF2B3							0.000762204	0.251165	PDHB	3.55572e-10	0.605618	TNS4										0.00471794	0.724033	MRPL49	2.05148e-06	1.01556	DKC1
												0.000253307	0.645122	DENND4B							0.000767739	0.477467	TXNDC15	3.61435e-10	1.47634	ZNF776										0.00471882	0.308996	PTAFR	2.05647e-06	0.250396	TNS3
												0.000255167	0.608228	DKC1							0.000794512	0.606594	GPR157	3.61718e-10	1.65626	ZCCHC11										0.00478683	0.688429	NMRK1	2.06771e-06	0.752585	ITSN2
												0.000257926	0.89593	NDUFV1							0.000805649	0.285031	RECQL	3.61889e-10	2.47491	SGK494										0.00483418	0.277298	HMBOX1	2.09921e-06	0.809265	SASH3
												0.000261605	0.4663	THEMIS							0.000820525	0.309183	IST1	3.64427e-10	1.37047	ZNF160										0.00484276	0.259779	LRRC47	2.14232e-06	0.536066	POLR2G
												0.000263584	0.926067	CAMKMT							0.000849698	0.323599	TBC1D7	3.64759e-10	1.55637	USP34										0.00487786	0.603052	ATF1	2.19408e-06	0.613315	IFITM3
												0.000266757	1.06147	ANAPC13							0.000883915	0.672104	BANP	3.67065e-10	1.27003	SLC38A1										0.00493384	0.444159	MYSM1	2.20502e-06	0.595438	MAPKAPK2
												0.000267384	0.302257	C9ORF72							0.000895485	0.729398	VASP	3.72899e-10	0.348158	STAP1										0.00508772	0.719039	COG5	2.21348e-06	0.304235	BRD7
												0.000277255	0.5995	TSPAN3							0.000910816	0.466406	UBR7	3.76763e-10	0.583451	SMURF2										0.00511735	0.475386	COPS8	2.21573e-06	0.408246	H2AFJ
												0.000280486	1.02774	TRAP1							0.000914785	0.864232	ZNF570	3.7833e-10	1.19824	WFDC1										0.0051305	1.15782	DCBLD1	2.22941e-06	1.13314	MATK
												0.000281769	2.91641	EXPH5							0.000989144	1.08888	DLGAP1	3.88906e-10	1.0266	BTLA										0.00547602	1.41218	MYO6	2.24454e-06	0.857752	BMS1
												0.000284446	0.861325	CPT2							0.000996876	3.90894	KCNB1	4.02284e-10	2.54895	ZNF736										0.0055285	0.541507	GALNT1	2.2831e-06	0.924625	CFAP97
												0.000288442	0.370177	ZNF260							0.00100656	0.287982	SIDT2	4.13245e-10	1.17829	RNF19A										0.00575166	1.18216	GALNT7	2.2912e-06	2.24028	SULT1B1
												0.000289806	0.489334	CAMTA1							0.00102125	0.308947	D21S2088E	4.13287e-10	0.683234	FARP1										0.00576669	0.55652	UGDH	2.33092e-06	0.859116	FOXN2
												0.000290522	0.436854	SDHAP1							0.00109341	0.290426	DOHH	4.16819e-10	1.19618	KIF27										0.00582174	0.779486	RGP1	2.3349e-06	0.991087	DNAL1
												0.000291808	0.768053	TMEM182							0.00109411	0.715488	SLC22A18	4.18656e-10	0.474597	CLUHP3										0.00589522	0.87735	DYRK1A	2.39871e-06	0.815592	CEPT1
												0.00029404	0.668791	NSUN6							0.00112675	0.316271	TFG	4.27007e-10	2.0521	FADS3										0.0060259	0.505527	PPIE	2.4141e-06	0.391083	NFU1
												0.000294668	0.461861	FOXL2NB							0.00114478	0.305486	CASP4	4.27352e-10	1.81671	EXOSC10										0.00624986	0.483027	LAMTOR3	2.42851e-06	1.01362	FCGR3A
[truncated: 2,103 more rows]
[truncated: 22 more columns]

## Sheet: Table_S2
cluster-1	cluster-2	cluster-3	cluster-4
[truncated: 562 more rows]

[truncated: 7 more sheets: Table_S3, Table_S4, Table-S5, Table_S6, Table_S7, Table_S8, Table_S9]
